# Supplementary material for: Multi-omics investigation of spontaneous T2DM macaque emphasizes gut microbiota could up-regulate the absorption of excess palmitic acid in the T2DM progression
Source: bioRxiv preprint, doi:10.1101/2024.10.17.618794, version 3 (2025-07-17)
Supplement: Table S2 [file 618794_file14.xlsx]

## Sheet: Sheet1
Names	log2FoldChange	p-value	VIP
(2s,3r,4s,5s,6r)-2-[(2r,3r,4s,5s,6r)-2-[[(3s,6s,8r,10r,12r,13r,14r,17s)-3,12-dihydroxy-4,4,8,10,14-pentamethyl-17-[(2s)-6-methyl-2-[(2s,3r,4s,5s,6r)-3,4,5-trihydroxy-6-(hydroxymethyl)oxan-2-yl]oxyhept-5-en-2-yl]-2,3,5,6,7,9,11,12,13,15,16,17-dodecahydro-1h-cyclopenta[a]phenanthren-6-yl]oxy]-4,5-dihydroxy-6-(hydroxymethyl)oxan-3-yl]oxy-6-(hydroxymethyl)oxane-3,4,5-triol	-2.0455	0.0012743	2.71461
Pyroglu-Ala	-0.602169	0.0019978	2.63176
Muscone	-0.944515	0.0043551	2.53127
Dexanabinol	-1.48091	0.0045768	2.62646
Desmethylverapamil	-1.85406	0.0058191	2.3204
Pyridaben	-0.704868	0.0061456	2.55344
Arcaine	1.34242	0.0067992	2.45036
1h-imidazole-1-acetamide	-1.15729	0.0073408	2.51628
Tridecanoic acid (Tridecylic acid)	-1.59248	0.0080724	2.03588
Phenylethylamine	-1.30134	0.0092392	2.4168
Suberylglycine	2.21214	0.010976	2.39481
N-3-oxohexadec-11z-enoyl-l-homoserine lactone	0.643733	0.011439	2.3534
1-phenylethanol	-1.40639	0.011793	2.33831
4-(1-piperazinyl)-1h-indole	-1.21741	0.012966	2.30422
Digoxigenin monodigitoxoside	-0.83553	0.013225	2.2387
Thr-Thr	0.913078	0.013477	2.37177
Ser-Asn	0.791659	0.013851	2.21877
Ser-Ile	1.23473	0.013982	2.23853
Pro-his	1.11249	0.014609	2.14792
N-acetyl-d-galactosaminitol	1.23225	0.015258	1.61185
Senegenin	-1.3502	0.016185	1.79049
Serotonin	-0.7753	0.017467	2.32383
Asn-Thr	0.675597	0.017524	2.14008
3-aminopyrazine-2-carboxylic acid	1.39878	0.017606	2.11322
Glufosinate	1.22665	0.018869	1.95201
Cyromazine	2.01841	0.019844	2.14619
Monensin	-1.6465	0.021254	2.26395
1,3,5(10)-estratrien-3,17.beta.-diol 17-glucosiduronate	1.02534	0.022271	1.81197
Leptomycin b	2.61187	0.022325	2.1756
Acetoveratrone	1.44322	0.022929	2.16414
Myriocin	-0.915527	0.023194	2.14978
Lys-Pro	0.875998	0.023643	2.06804
Gln-his	0.813772	0.024907	1.8381
4-(tert-butylamino)-6-ethylamino-5h-1,3,5-triazin-2-one	-1.00187	0.026068	2.08906
16.alpha.,17,21-trihydroxypregna-1,4-diene-3,11,20-trione	-0.852291	0.026586	2.20472
Genistein	1.16799	0.027103	2.2422
Asiatic acid	-0.912179	0.027395	1.723
Saikosaponin d	-0.722675	0.029299	2.07298
N-octylsphingosine	-0.766432	0.0307	2.05651
Hymeglusin	-0.625361	0.030932	2.08718
Gly-Leu	1.23328	0.032506	1.88336
Norvaline betaine	1.8366	0.033162	2.03233
Gln-thr	0.817105	0.033683	2.15121
5'-hydroxymethyl-5'-desmethylmeloxicam	-1.09825	0.034775	1.86285
Piperazine-n,n'-bis(2-hydroxypropanesulfonic acid)	0.698459	0.035089	1.53926
1h-indole-5-carboxylic acid	-0.738775	0.035184	1.90288
Enniatin b	1.06771	0.036382	1.98453
Cytarabine	1.33064	0.038579	2.10038
Resibufogenin	-0.649601	0.038828	1.95342
Myristyl sulfate	-1.10634	0.039917	2.0208
L-propionylcarnitine	4.01673	0.040281	2.03624
N-octanoylsphingosine	-0.6153	0.040327	1.93653
Indole-3-acetaldehyde	-0.595993	0.040694	2.05522
Pimelic acid	-1.03614	0.041123	1.99782
3-hydroxypyridine	1.08641	0.041772	2.06983
1h-indole-3,5-dicarboxylic acid	-0.722483	0.041904	1.93691
17-phenoxytrinorprostaglandin f2.alpha.	0.888827	0.043297	1.41035
3,5-dihydroxydecanoic acid	1.06084	0.04378	1.98806
.alpha.-keto-.gamma.-(methylthio)butyric acid	-0.797116	0.044712	1.97303
Orotate	0.592904	0.04687	1.96558
Pro-gln	0.785976	0.047009	1.82373
N-desethylsunitinib	-0.721765	0.047344	1.90545
1-palmitoyl-2-hydroxy-sn-glycero-3-phospho-(1'-rac-glycerol)	-0.699493	0.048288	1.88162
Creatinine	1.26956	0.049026	1.99466
Arg-Pro	1.22643	0.050742	1.91699
4-methylcyclohexaneacetic acid	0.625722	0.050811	1.90317
Proscillaridin a	-0.600288	0.05118	1.78627
O-desmethyl-cis-tramadol	0.750441	0.053112	1.72772
Neoruscogenin	1.48215	0.053481	1.83924
Prostaglandin i2	-2.66598	0.053788	1.96496
Gly-Asn-Arg	0.582916	0.057454	1.80706
Imidazo[5,1-f][1,2,4]triazin-4(1h)-one	-0.849192	0.05893	1.85781
Pro-hyp	-0.795599	0.061236	1.82439
His-Leu	1.03185	0.061957	1.74436
Lignoceric acid	-1.24761	0.062477	1.85882
Hexanoyl-l-carnitine	1.22551	0.063051	1.94992
Imazapyr	1.46438	0.063864	1.71609
Pentamidine	-0.685392	0.064129	1.75384
Porphobilinogen	0.852567	0.06497	1.60312
Gly-His	0.93214	0.065281	1.6203
N-(4-piperidinyl)acetamide	1.88905	0.065992	1.88866
Thromboxane b2	-1.39668	0.067406	1.52043
His-Glu	1.04977	0.067756	1.35121
N-acetylhistamine	3.05339	0.068849	1.85994
17,20-dimethylprostaglandin f1.alpha.	-0.913005	0.068978	1.63731
Val-Asp	0.807655	0.069175	2.05019
N-.alpha.-acetyl-l-ornithine	-1.01096	0.069262	1.78572
Pe(16:0e/10-hdohe)	-0.603028	0.069349	1.41168
(3.beta.,5.alpha.)-4,4-dimethylcholesta-8,14,24-trien-3-ol	-0.967936	0.069433	1.80948
Histamine	1.98441	0.07317	1.80747
(r)-butyrylcarnitine	1.41494	0.073506	1.76156
Diethylstilbestrol	0.850967	0.07481	1.43631
Ile-Glu	0.877673	0.075179	1.76496
Trans-crocetin	-1.02661	0.076727	1.80831
Aleuritic acid	0.960536	0.076927	2.23706
Thr-His	0.731162	0.077378	1.73377
Geldanamycin, 17-demethoxy-17-[[2-(dimethylamino)ethyl]amino]-	-0.735935	0.079101	1.86795
N,n'-diacetylchitobiose	-0.706401	0.07928	1.75561
N-acetylcadaverine	2.16122	0.081327	1.69446
Mitoxantrone	-0.596898	0.081577	1.48516
Ala-Ala	-0.577897	0.081729	1.8602
Pro-leu	2.6693	0.083501	1.82392
Carnitine	1.89847	0.084823	1.76958
Curcumin	1.37669	0.085946	1.61349
Icilin	-1.2186	0.087849	1.57923
L-iditol	2.24683	0.088293	1.4951
2-Deoxyribose 5-phosphate	-0.734788	0.088358	1.93201
Dexpanthenol	-0.900331	0.089333	1.58987
9-phenyl-1-(2,4,6-trihydroxyphenyl)nonan-1-one	-0.949249	0.093423	1.5273
Phenylpyruvate	-0.982084	0.094044	1.28436
Artesunate	1.22251	0.097933	0.972579
Gln-val	0.832436	0.098328	1.44342
1-hexadecyl lysophosphatidic acid	-0.615321	0.099024	1.22496
Glabrol	-0.675466	0.099055	1.48928
Isovaleryl-l-carnitine	1.83139	0.099074	1.70452
Lys-Gln-Arg	1.03036	0.099564	1.71699
Ajmalicine	-0.458956	0.10019	1.61085
1-stearoyl-2-arachidonoyl-sn-glycero-3-phospho-_1-sn-glycerol_	-0.775736	0.10022	1.37918
35-dimethoxy-3574-tetrahydroxyflavone	0.363094	0.10023	1.79859
N-fructosyl pyroglutamate	1.06547	0.10028	1.59266
3-acetoxypyridine	0.396818	0.10217	1.677
5-Hydroxyhexanoic acid	-1.06318	0.10255	1.71224
Met-Leu-Arg	-0.357535	0.10322	1.63691
Vincamine	-0.651425	0.10343	1.53467
6a12a-didehydroamorphigenin	0.675083	0.10351	1.37259
Gly-Arg	0.971656	0.10369	1.73236
Ethcathinone	-0.550106	0.10401	1.63444
Octadecanedioic acid	-1.3762	0.1054	1.40777
Mangostine	-0.258991	0.105469	1.81274
D-glucosamine 1-phosphate	-0.344531	0.10596	1.09432
Baccatin iii	-0.699743	0.106084	1.80039
Dronedarone	-0.500214	0.106373	1.84116
Rabeprazole	-0.560781	0.106607	1.88072
Polygalic acid	0.604419	0.10661	1.47138
2-deoxyuridine 5-monophosphate	-1.39785	0.106678	1.75011
Trp-Met-Arg	-0.409492	0.107363	1.97794
Fluocinolone acetonide	-0.450448	0.10745	1.59063
5s-hydroxy-6e8z11z14z-eicosatetraenoic acid	-0.78482	0.10753	1.65398
Pyridoxal phosphate	0.282324	0.108193	1.54065
Asparagine	0.506158	0.108368	1.99598
Val-Asp-Arg	-0.617862	0.108734	1.88603
Rac-n-allyloxycarbonyl-cis-moxifloxacin acyl-.beta.-d-glucuronide allyl ester	-0.529084	0.109457	1.86735
Asn-Thr-Lys	-0.299306	0.109937	1.88672
Val-Val	1.03141	0.11106	1.48447
3-o-acetyl-16alpha-hydroxytrametenolic acid	-0.483949	0.11138	1.46968
Mitragynine	-0.37784	0.11167	1.57673
Thr-Arg	0.576122	0.11178	1.63413
Asn-Pro	0.437007	0.11197	1.6689
4-ohe1-1-n3ade	-0.611713	0.112617	1.7286
Glycerol 1-myristate	-0.605141	0.11273	1.64104
12-dimyristoyl-sn-glycerol	-0.765227	0.11307	1.67622
Leu-Pro	0.667786	0.1134	1.54872
Dl-5-hydroxylysine	-0.418588	0.11378	1.50076
Levofloxacin	-0.362093	0.11379	1.43473
Eicosapentaenoic acid	0.409226	0.114	1.50194
Lauramidopropylbetaine	-0.501816	0.114188	1.67103
Ser-Val-Lys	0.564982	0.11437	1.56403
Adrenosterone	-0.663913	0.11463	1.51981
2-hydroxy-6-pentadecyl-n-phenylbenzamide	-0.48419	0.11478	1.21705
Cytochalasin e	-0.415652	0.11534	1.57587
M-fluoro-dl-phenylalanine	-0.671903	0.11569	1.47984
Stachydrine	0.813476	0.11576	1.58784
Aldosterone	-0.771127	0.11624	1.62396
Bazedoxifene	-0.571413	0.11882	1.40323
Testosterone enanthate	0.617657	0.11927	1.47498
15-diaminonaphthalene	-0.614298	0.119423	1.66716
(.+/-.)-11-nor-.delta.9-tetrahydrocannabinol-9-carboxylic acid	-1.23067	0.12096	1.78412
Arachidonic acid _peroxide free_	0.394073	0.12175	1.51642
Myristoyl-l-carnitine	-1.41398	0.12182	1.49386
1-stearoyl-2-myristoyl-sn-glycero-3-phosphocholine	0.486746	0.12235	1.48899
1-oleoyl-2-hydroxy-sn-glycero-3-phospho-_1-rac-glycerol_	-0.485445	0.12263	1.59296
12-dilauroyl-sn-glycero-3-phosphate	-0.906766	0.12429	1.67217
567-trimethoxycoumarin	0.544025	0.12547	1.67836
Methyl 56-diacetyloxy-10-hydroxy-24b7710a12a-hexamethyl-12-methylidene-148-trioxo-4a566a91010b11-octahydronaphtho_12-h_isochromene-2-carboxylate	0.28386	0.12565	1.60862
2-(5-oxovaleryl)phosphatidylcholine	-0.586124	0.1258	1.58887
Chymostatin	0.877157	0.12593	1.13257
Gln-Gly-Arg	0.844725	0.12616	1.46802
Dihydrotachysterol	0.363618	0.1268	1.48339
Thr-Val-Lys	1.10257	0.12691	1.45777
Tyrosine	0.831155	0.12709	1.30242
Caproic acid	-1.11562	0.12757	1.62508
Ophthalmate	-0.686395	0.12927	1.43059
Dicoumaroyl spermidine	0.46889	0.13012	1.45757
Phytosphingosine	1.186	0.1311	1.50579
3-hydroxyxanthone	-0.76311	0.13185	1.45029
Capecitabine	-0.402563	0.13232	1.44577
(2s,3s,4s,5r,6r)-6-[[(3s,6ar,6bs,8as,14br)-8a-carboxy-4,4,6a,6b,11,11,14b-heptamethyl-1,2,3,4a,5,6,7,8,9,10,12,12a,14,14a-tetradecahydropicen-3-yl]oxy]-3,4,5-trihydroxyoxane-2-carboxylic acid	0.782211	0.13295	1.48038
3-hydroxyoctanoic acid	0.776861	0.13395	1.65542
2-o-methylcytidine	-1.18021	0.13422	1.40284
Thr-Leu-Lys	0.7326	0.13431	1.50489
Arginine	-0.742129	0.13509	1.52914
Phenyllactic acid	-1.5868	0.13809	1.54406
Prostaglandin j2	-0.702323	0.13905	1.27119
Cis-2-tert-butoxycarbonylamino-2-methylcyclohexanecarboxylic acid	-0.553091	0.13915	1.46206
Zinniol	-0.80961	0.13996	1.51374
Hexadecanedioic acid	0.523213	0.14071	1.88379
Lys-Asp	0.405754	0.14085	1.4602
23-dideoxyuridine	0.603418	0.1434	1.26912
N-methyl-l-isoleucine	0.549391	0.14354	1.29131
4-aminosalicylic acid	0.38209	0.14458	1.59668
Didodecyl 33-thiodipropionate oxide	-1.01876	0.14503	1.56251
Ala-Gly-Lys	-0.283456	0.14589	1.43748
581114-eicosatetraenamide n-_4-hydroxy-2-methylphenyl_- _5z8z11z14z_-	0.315724	0.14596	1.64166
Taurine	1.25877	0.14636	0.834037
Creatine	0.281795	0.14642	1.56956
Heptadecanoic acid	-0.686373	0.14713	0.880272
Fucoxanthin	0.832753	0.14719	1.35736
478-trimethoxy-35-dimethylchromen-2-one	-0.611	0.14745	1.43809
Trehalose	4.12044	0.14773	1.44232
Salicyluric acid	0.437704	0.14818	1.28507
Tryptophan	0.788774	0.14833	1.39133
N-acetylcarnosine	1.3897	0.14908	1.55833
Tricosanoyl ethanolamide	-0.528409	0.14962	1.41522
3.beta.7.alpha.-dihydroxy-5-cholestenoic acid	-1.37194	0.15008	1.70261
(z)-26-dimethyl-7-_4-methyl-5-oxooxolan-2-yl_-3-__345-trihydroxy-6-_hydroxymethyl_oxan-2-yl_oxymethyl_hept-5-enoic acid	-0.49957	0.15014	1.39515
Trioxsalen	0.386639	0.15016	1.65084
N-myristoylsphinganine	-0.550596	0.15093	1.4611
Cyasterone	-0.764283	0.15108	1.51371
4-iodosuberoylanilide hydroxamic acid	-0.443958	0.15195	1.33187
Estra-135_10_7-tetraene-317.beta.-diol	-0.688753	0.15203	1.43914
N-Acetyl-L-alanine	-0.319422	0.15374	1.64684
Val-Pro	0.533867	0.15375	1.345
Bis_2-ethylhexyl_ adipate	0.458907	0.15422	1.27715
1h-indole-2-carboxylic acid ethyl ester	-0.955676	0.15467	1.42854
Acetyl-dl-leucine	0.570517	0.15485	1.29953
2-o-methyluridine	-1.16451	0.15494	1.20721
Retrorsine n-oxide	-0.501621	0.15551	1.485
L-bunolol	-0.755062	0.15564	1.58456
Lys-Phe	0.651449	0.15596	1.37946
Glabrolide	-0.394395	0.15605	1.37418
Biocytin	-0.296446	0.15607	1.44337
6-hydroxy-34-dihydro-1h-quinoline-2-one	-0.640121	0.15636	1.34096
Cytochalasin b	0.426424	0.15657	1.52113
Myristic acid	-0.73218	0.15668	1.34904
Maltotriose	-0.53613	0.1569	1.34355
Trans-cinnamaldehyde	-0.351627	0.1578	1.56827
N-acetylglucosaminylasparagine	-0.779468	0.15852	1.63796
1-stearoyl-2-oleoyl-sn-glycero-3-phosphoethanolamine	-0.638475	0.15862	1.32127
1718-dihydroxy-5z8z11z14z-eicosatetraenoic acid	-0.654957	0.15868	1.18763
Tetranorprostaglandin j2	0.56485	0.15879	1.45427
Maltose	2.2987	0.1597	1.46
Prostaglandin g2	-0.571274	0.1603	1.3202
Methyl _1r4as9s10s_-10-acetyloxy-59-dihydroxy-14a-dimethyl-2-oxo-7-propan-2-yl-1010a-dihydro-9h-phenanthrene-1-carboxylate	1.46253	0.16061	0.988584
Asn-Gly-Arg	-0.367783	0.16273	1.36879
Tetrahydro-l-biopterin	-0.255902	0.1629	1.51948
5-aminonaphthalene-2-sulfonic acid	-1.00151	0.16322	1.49876
Famotidine acid methyl ester	-1.00274	0.16391	1.42699
Tyr-Pro	0.535133	0.16423	1.31483
Leukotriene f4	-0.404859	0.16446	1.3621
5-_morpholinomethyl_-3-_2-nitrobenzylidenamino_-2-oxazolidinone	-0.707032	0.16455	1.43535
Ile-Asp	0.615681	0.16538	1.49153
(.+/-.)-norketamine	-2.41638	0.16568	1.2843
His-Val-Arg	0.398758	0.16575	1.4757
Succinate	-1.16134	0.16671	1.46808
Bifenazate	-0.718566	0.16674	1.30767
Arg-phe	0.760566	0.16799	1.41694
Heptadecasphing-4-enine	-0.302268	0.16834	1.26389
4-hydroxybenzaldehyde	0.417288	0.169	1.00844
26-dimethoxyphenol	-0.374569	0.16969	1.45811
Schaftoside	-0.416465	0.16998	1.6556
Leu-Val	0.609323	0.17016	1.29815
Ile-Pro-Ile	0.563604	0.17028	1.32365
Ribavirin	-0.33328	0.17145	1.3704
O-phosphotyrosine	-0.480424	0.17156	1.44133
1920-dihydroxy-4z7z10z13z16z-docosapentaenoic acid	0.474129	0.17169	1.76086
Gentianose	1.23304	0.17169	1.47954
Palmitic acid	-0.4496	0.17373	0.881851
1-_9z12z-octadecadienoyl_-2-hydroxy-sn-glycero-3-phosphoethanolamine	-0.555588	0.17386	1.61243
Dipyridamole	-0.283256	0.17403	1.42757
3-dehydrocholic acid	2.18595	0.17433	0.749053
(-)-riboflavin	0.222793	0.17442	1.34736
Thr-Thr-Arg	0.258386	0.17525	1.31713
His-Tyr	-0.628335	0.17571	1.32564
1-palmitoyl-sn-glycero-3-phosphocholine	-1.35824	0.17677	1.44836
5-hydroxy-34-dihydro-2_1h_-quinolinone	-1.44627	0.17722	1.59617
Phe-gly	-0.379609	0.17789	1.34017
Pregnenolone sulfate	-0.522646	0.17873	1.312
12_13_-epoxy-9z-octadecenoic acid	0.595175	0.17949	1.33398
Xestospongin c	-1.85051	0.18001	1.46188
Harmine	2.4711	0.18042	1.30594
Leucylleucine	0.434975	0.18172	1.34151
(3.beta.)-allopregnanolone sulfate	-0.66326	0.18196	1.12799
Lys-Gly	0.483911	0.1822	1.40909
6-ketoprostaglandin e1	-0.648443	0.18372	1.20289
1h-indazole-1-pentanoic acid 3-__tricyclo_3.3.1.1_37__dec-1-ylamino_carbonyl_-	0.789731	0.18402	1.31321
5.beta.-pregnane-3.alpha.17-diol-20-one	-0.335264	0.18479	1.28848
Nudifloramide	1.29967	0.18488	1.44831
Amikacin	0.390576	0.1849	1.31423
Arg-Ala	0.702474	0.18509	1.4127
Andrastin c	0.65487	0.18652	1.11137
6-acetylmorphine	-0.439592	0.18705	1.25279
52-O-dimethylcytidine	0.369717	0.18754	1.36222
4-hydroxy-l-glutamic acid	0.507605	0.18839	1.43182
3-methylhistamine	-0.354512	0.18841	1.25484
(2-oxo-23-dihydro-1h-indol-3-yl)acetic acid	0.831692	0.18869	1.43382
Olanzapine	-0.285575	0.19007	1.42707
1-myristoyl-2-hydroxy-sn-glycero-3-phosphoethanolamine	-0.608339	0.19074	1.3204
Val-Ala	-0.4219	0.19152	1.32084
N-.alpha.-_tert-butoxycarbonyl_-l-proline	-0.408995	0.19169	1.26086
N-Acetyl-D-Glucosamine 6-Phosphate	-1.16269	0.19284	1.43444
Olopatadine	-0.343222	0.19288	1.272
16-phenyltetranorprostaglandin f2.alpha.	-0.638826	0.19316	1.46778
Arg-Met	0.798313	0.19322	1.41189
12-dimyristoyl-sn-glycero-3-phosphate	-0.49628	0.19382	0.641228
23-dideoxycytidine	-0.353045	0.19414	1.30501
6-_methylthio_guanine	0.710382	0.19466	1.3876
Phe-Ala	0.532638	0.19467	0.937818
Neomangiferin	1.1251	0.19485	1.36076
Allantoin	2.38931	0.195	0.963106
Phe-Ala-Leu	0.321168	0.19501	1.17587
Enterolactone	-1.07164	0.19559	0.961145
Dl-Leu-dl-Val	0.529852	0.19617	1.38863
Leukotriene e4 methyl ester	0.384019	0.19634	1.44032
Fumonisin la4	-0.79616	0.19659	1.22522
Pi_18_11617-epdpe_	-0.534867	0.19782	1.56254
N-stearoyltaurine	0.40645	0.19878	1.01395
Quinolin-8-ol	-0.618162	0.19904	1.30481
Theophylline	-0.834969	0.20014	1.17024
Ionomycin	-0.79001	0.20065	0.786783
Celaxanthin	-0.39628	0.20118	1.19387
7.alpha.-hydroxy-4-cholesten-3-one	0.451084	0.2023	1.35025
Medroxyprogesterone 17-acetate	-0.395002	0.20264	1.27086
Dantrolene	0.0297959	0.20276	1.29311
Cytochalasin a	0.327845	0.20297	1.13898
Oleamide	0.173131	0.20329	1.25799
Swietenocoumarin b	-0.593509	0.20334	1.1183
2-hydroxyestradiol	-0.320272	0.20341	1.30149
Gly-Val-Arg	0.90083	0.20487	1.20888
_2e6e11e13e_-18-_26-dioxopiperidin-4-yl_-9-hydroxy-8-methoxy-101214-trimethyl-15-oxooctadeca-261113-tetraenoic acid	0.66805	0.20585	1.20615
N-oleyl-isoleucine	-0.460464	0.2065	1.08028
Saponarin	0.213209	0.20752	1.21272
1-o-_9z-octadecenyl_-sn-glycero-23-cyclic-phosphate	0.464318	0.20781	1.49296
D-glucarate	-0.729618	0.20796	1.36282
Cis-13-eicosenoic acid	0.262815	0.20826	1.22569
7.alpha.24_s_-dihydroxycholesterol	0.354868	0.20836	1.32155
2-__2r4as8s8as_-8-_2-__4as7r8ar_-7-_1-carboxyethenyl_-1-hydroxy-4a-methyl-2-oxo-6788a-tetrahydro-5h-naphthalen-1-yl_ethyl_-4a-methyl-7-oxo-123488a-hexahydronaphthalen-2-yl_prop-2-enoic acid	0.639496	0.20851	0.916188
Val-Glu-Lys	-0.454059	0.20887	1.19707
Nicotinamide n-oxide	0.29239	0.2096	1.18829
Ginsenoside f1	0.546733	0.20968	1.42533
(r)-(+)-arachidonyl-1'-hydroxy-2'-propylamide	1.1371	0.21013	1.41723
Pro-phe	-0.364127	0.2108	1.21365
2-isopropylmalic acid	-0.65146	0.21091	1.34802
Phe-gln	0.314087	0.21097	1.19405
Cytidine 23-cyclic phosphate	0.241875	0.21125	1.56001
Chaulmoogric acid	0.688712	0.21155	1.2781
Adenosine	-0.279347	0.21208	1.25767
N-lauroyl-d-erythro-sphinganine	-0.406278	0.21223	1.34087
6h-thieno_32-f__124_triazolo_43-a__14_diazepine-6-acetamide 4-_4-chlorophenyl_-n-_4-hydroxyphenyl_-239-trimethyl- _6s_-	-0.375332	0.21234	1.40264
Seneciphyllin	-0.362024	0.21288	1.12125
N-nitrosopyrrolidine	0.347792	0.21315	1.34807
Atorvastatin	-0.280844	0.21378	1.33312
hydrocortisone 21-acetate	0.423086	0.21409	1.07366
18-carboxydinorleukotriene b4	-0.401997	0.21431	1.19391
1-oleoyl-2-palmitoyl-rac-glycerol	-0.448274	0.21443	1.19646
Furmecyclox	-0.60283	0.21475	1.31596
Isovaleric acid	-0.466135	0.21771	1.33
Ginkgolic acid i	0.578872	0.2179	1.72765
N-methyl-l-glutamic acid	-1.19075	0.21841	1.25864
Aspidocarpine	0.382166	0.21907	1.11877
Lovastatin hydroxy acid	2.00123	0.21946	0.769876
_s_-10-hydroxycamptothecin	-1.65979	0.21963	1.16016
1-_1z-octadecenyl_-2-_4z7z10z13z16z19z-docosahexaenoyl_-sn-glycero-3-phosphocholine	-0.611309	0.22015	1.43462
1616-dimethylprostaglandin f2.alpha.	0.609383	0.22092	1.30452
2-_n-morpholino_ethanesulfonic acid	0.444312	0.22111	0.988716
Asn-Lys-Arg	0.458635	0.2212	1.20667
Fluotrimazole	-0.485698	0.22145	1.16357
Lsd	-0.588089	0.22146	1.23655
2_1h_-pyridinone	-0.392261	0.22229	1.19585
Ile-Arg	0.31481	0.22341	1.09908
17-keto-4_z_7_z_10_z_13_z_15_e_19_z_-docosahexaenoic acid	0.327513	0.2236	1.08187
14-bis__p-hydroxyphenethyl_amino_anthraquinone	0.974802	0.22433	0.914746
Cycloheximide	0.327363	0.22447	1.20418
1h-indole-3-carboxamide 1-_5-fluoropentyl_-n-1-naphthalenyl-	-0.667615	0.22484	1.37221
N-acetyl-s-farnesyl-l-cysteine	-1.22764	0.22496	1.27713
N-acetyl-l-glutamate	-0.353838	0.22687	1.40805
His-Pro	1.08173	0.22716	1.27165
Quinolin-2-ol	-0.57029	0.22751	1.23393
12s-hydroxy-5z8e10e-heptadecatrienoic acid	-1.48985	0.22759	1.27814
Fenoldopam	2.54049	0.22794	1.35294
Poricoic acid a	-0.369944	0.2285	1.35561
Lys-Ala	0.714854	0.22853	1.11866
Testosterone	-0.402388	0.2287	1.08086
P-acetaminobenzaldehyde	-0.755757	0.22871	1.31176
D-Glucuronate	-0.350615	0.22929	1.14941
Glu-Ala-Lys	-0.34227	0.23085	1.3243
3-_4-methyl-1-_2-methylpropanoyl_-3-oxocyclohexyl_butanoic acid	0.332797	0.23119	1.14749
Ajmaline	-0.326657	0.23121	1.21517
D-galacturonic acid	-0.831968	0.23144	1.28043
Albizziin	0.6583	0.2315	1.24744
Val-His	0.472411	0.2317	1.12921
Docosaenoyl ethanolamide	1.35932	0.23202	1.34744
1-methylhistidine	-0.311551	0.23202	1.19436
G-guanidinobutyrate	0.804978	0.23204	1.35191
Eriodictyol	0.622058	0.23219	1.32787
Gly-Gly-His	0.381212	0.23286	0.996178
1-hydroxybenzotriazole	3.42783	0.23307	1.28533
Fumonisin py4	-0.742709	0.23336	1.16689
Medicagenic acid base _ o-hexa	-0.566548	0.2343	1.23968
Quinaldic acid	0.604797	0.23522	1.0936
6-hydroxyindole	1.32382	0.23578	1.30322
Aspartic acid	-0.254101	0.2359	1.17528
5alpha-Androstane-317-dione	0.590001	0.2371	1.79242
_-_-perillyl alcohol	0.285496	0.23939	1.08998
Ostruthin	-0.491738	0.23991	1.48649
3-__2s3r4s5s6r_-45-dihydroxy-6-_hydroxymethyl_-3-__2s3r4s5s6r_-345-trihydroxy-6-_hydroxymethyl_oxan-2-yl_oxyoxan-2-yl_oxy-2-_34-dihydroxyphenyl_-5-hydroxy-7-methoxychromen-4-one	0.316779	0.2401	1.17348
1h-indole-1-pentanoic acid 3-__2233-tetramethylcyclopropyl_carbonyl_-	-0.525453	0.24077	1.40432
Leu-Asp-Lys	-0.27371	0.24092	1.12996
44-dimethylcholest-8_9_24-dien-3.beta.-ol	-0.612497	0.24177	1.2485
2-linoleoyl-1-palmitoyl-sn-glycero-3-phosphoethanolamine	-0.441289	0.24322	1.21932
1-palmitoylglycerol	-0.43423	0.24367	1.1614
Alisol a 24-acetate	0.389438	0.24391	1.13195
Prilocaine	2.92152	0.24403	1.11389
1-_1z-hexadecenyl_-sn-glycero-3-phosphocholine	-1.36228	0.24479	1.13926
Glycine nn-_12-ethanediylbis_oxy-21-phenylene__bis_n-_carboxymethyl_-	-0.231847	0.24492	1.15878
Taxinine m	-0.30782	0.24495	1.16855
Trigonelline	1.50075	0.24533	1.31099
Glutaraldehyde	0.28436	0.24544	1.28051
N-_4-chlorophenyl_-4-piperidinamine	-0.350737	0.24597	1.14359
N-acetylsulfamethoxazole	-0.433556	0.24629	1.16712
5-androstene-3.beta.17.beta.-diol	0.280764	0.24643	1.13755
Glycerophosphocholine	-0.264172	0.24688	1.13808
Fluphenazine	-0.423912	0.24762	1.29118
4-amino-4-methylpentanoic acid	0.789887	0.24785	1.11871
Nn-dimethyl-l-valine	0.453916	0.24815	1.00115
C-6 ceramide	-0.235111	0.24969	1.04991
581114-eicosatetraynoic acid	-0.422578	0.25066	1.0649
Pentadecanoyl ethanolamide	0.725574	0.25132	1.2158
2-acetyl-3-methylpyrazine	-0.310938	0.25181	1.24101
Androsterone glucuronide	-0.8607	0.25199	1.21943
Hyperforin	0.155881	0.25226	1.06282
Mefenamic acid	-0.263364	0.25317	1.12897
3-Phenylpropanoic acid	-0.759617	0.25387	0.856669
DL-Glutamic acid	-0.203586	0.25462	1.20524
Fahfa 34_0	-0.284621	0.25468	0.680759
DL-tyrosine	-0.328304	0.25528	1.18964
Thymidine 5-monophosphate	-0.768058	0.25534	0.958912
Niacinamide	-0.370955	0.25603	1.06852
Cholic acid	5.34856	0.2565	0.648054
Deoxyinosine	-0.274093	0.25654	0.696288
Oleoyl-l-carnitine	-1.08649	0.25683	1.02536
Prostaglandin e1 ethanolamide	-0.441021	0.25729	1.27889
7-methylthioheptyl glucosinolate	-1.7694	0.258	1.31803
Nintedanib	-0.335029	0.25808	1.08331
Corey pg-lactone diol	0.298023	0.25837	1.07588
Pyroglu-pro	0.200943	0.2594	1.14146
3-hydroxykynurenine	0.496727	0.25977	1.21563
Pro-val	0.719538	0.25996	1.14333
N-acetyl-dl-valine	-0.532202	0.2604	1.07661
Gln-pro	-0.570462	0.26137	1.06074
Cinchonine	-0.488669	0.26205	1.06597
Trans-ferulic acid	0.198641	0.26309	1.15269
Kynurenic acid	0.577961	0.26312	1.5218
Oligomycin a	0.612623	0.26329	1.10834
Ala-Lys	0.614985	0.26351	1.17287
Gomisin c	0.653586	0.26444	1.1483
Hypoxanthine	-0.333714	0.26459	1.20568
Val-Arg	0.416616	0.26473	1.29276
_2s3r5r10r13r14s17s_-2314-trihydroxy-1013-dimethyl-17-__2r3r5r_-236-trihydroxy-56-dimethylheptan-2-yl_-234591112151617-decahydro-1h-cyclopenta_a_phenanthren-6-one	-0.237755	0.26474	1.06443
3-methylbenzyl alcohol	-0.145559	0.26547	0.992953
Adipic acid	-0.621198	0.26575	1.38575
Manoalide	0.40566	0.26652	1.02205
Ser-Leu-Ile-Gly-Lys-Val-Amide	-0.223752	0.26734	1.06202
Cisapride	0.304661	0.2676	1.11365
Dasatinib	0.24784	0.26897	1.07289
Lpe 18_2	-1.16226	0.26977	0.837215
1-o-hexadecyl-2-o-ethyl-sn-glycero-3-phosphocholine	0.293016	0.26988	1.4078
Nabilone	0.779113	0.27024	1.35945
Glu-His	1.77629	0.27069	1.20972
Prosapogenin a	0.342467	0.27086	1.07362
Latanoprost	0.289399	0.27092	0.950328
Cucurbitacin d	-0.953836	0.27107	1.05864
N-acetyldihydrosphingosine	-0.267154	0.27119	1.15849
Cholest-5-ene-3.beta.4.beta.-diol	0.39859	0.27299	1.06696
Arg-Thr	0.407158	0.27308	1.17042
Hydrocortisone	-0.43977	0.2745	1.03853
1-arachidoyl-2-hydroxy-sn-glycero-3-phosphocholine	-0.576168	0.27485	1.03183
Thr-Glu	0.417794	0.27494	1.40974
Thr-Leu	0.545385	0.275	1.07338
Lys-Val	0.814656	0.27552	1.14978
Medicagenic acid	-0.776467	0.27589	1.28374
Leu-Ile	0.266394	0.27689	1.16312
Trp-Ile	0.291823	0.27813	1.1025
Metoprolol acid	-0.430733	0.27843	0.937977
Artemisinin	-0.416691	0.27941	1.0325
Palatinose	0.583569	0.2807	0.943847
Uracil	-0.86583	0.28103	1.04201
Inabenfide	-1.03243	0.28105	1.12666
Mycophenolate mofetil	0.391823	0.28164	1.24565
Ser-Leu-Arg	0.273799	0.28224	1.07467
Arctigenin	-0.623379	0.28364	1.15963
Naringin	0.215153	0.28389	0.774326
alpha-Tocopherol _Vitamin E_	-0.425229	0.28695	1.07978
Rac-trans-4-cotininecarboxylic acid methyl ester	-0.267477	0.28726	0.98799
1-_10z-heptadecenoyl_-sn-glycero-3-phospho-_1-rac-glycerol_	-0.323008	0.28739	1.29481
1-aminocyclopropanecarboxylic acid	-0.187925	0.28744	1.12224
Fahfa 36_1	-0.165777	0.28769	0.657585
Hydroxyphenyllactic acid	-0.563217	0.28782	0.87303
Hirsutine	0.447619	0.28817	0.921359
Pygenic acid c	-0.839196	0.28888	1.0785
Cimicifugoside h 2	-0.786316	0.29035	1.21996
Quinine	-0.541878	0.29044	0.983852
3-hydroxybutyrylcarnitine	4.53042	0.2905	1.12115
7-methylguanine	0.187342	0.29073	1.09848
10-hydroxy-4z7z11e13z16z19z-docosahexaenoic acid	-0.295357	0.29092	0.589113
Desferrioxamine d2	0.423658	0.29126	1.14046
3-methoxylimaprost	-0.552698	0.29166	1.4459
Gln-Arg-Arg	0.425609	0.2921	1.02829
4-androstene-11.beta.17.beta.-diol-3-one	-0.343534	0.29239	1.05345
Quinoline-28-diol	-1.58596	0.29311	0.977929
1-palmitoyl-2-linoleoyl-sn-glycero-3-phosphocholine	-0.4913	0.29325	0.955447
4-acetamidobutanoate	-0.317411	0.29361	1.25936
Ala-Thr-Arg	0.337661	0.29388	1.02859
D-glucuronic acid	0.355544	0.29522	0.914076
Thr-Lys	1.10043	0.29587	0.885254
Pitavastatin	0.251145	0.29731	1.08653
4-quinazolinamine 2-_hexahydro-4-methyl-1h-14-diazepin-1-yl_-67-dimethoxy-n-_1-_phenylmethyl_-4-piperidinyl_-	-0.260425	0.29754	1.08294
Phenylacetyl-l-glutamine	0.370038	0.29859	1.12636
Cimifugin	1.37558	0.29863	1.08544
5-O-methylthymidine	0.187782	0.29884	1.05643
Lys-Leu	0.751893	0.29979	1.02732
Fusidic acid	0.235643	0.30032	0.920151
Methylprednisolone succinate	-0.361657	0.30042	1.34924
Caperatic acid	0.180348	0.30065	0.951055
Val-met	0.370516	0.30435	1.01559
Lys-Thr	0.666406	0.30636	1.09796
4-hydroxyphenethyl alcohol	-0.48545	0.30763	1.15039
Phenacetin	0.475942	0.30773	1.02769
3-methyl-l-histidine	-0.265285	0.30799	1.11054
Pheniramine	1.71367	0.30805	1.15462
Loxistatin acid	-0.514461	0.30817	1.10397
Thr-Met	0.460767	0.30925	1.1578
Isovalerylglycine	0.229064	0.31012	0.847581
.beta.-d-glucopyranosiduronic acid 5-_3-__2233-tetramethylcyclopropyl_carbonyl_-1h-indol-1-yl_pentyl	-0.237113	0.31094	1.02846
Reserpiline	0.425125	0.31113	0.637189
Gln-Val-Lys	0.448716	0.3116	0.91625
3-ketopetromyzonol	0.687335	0.31223	0.9264
22-hydoxy-2-hopen-1-one	0.503742	0.31249	1.19615
25-dimethoxy-4-ethylamphetamine	-0.343953	0.31266	1.12179
1-monolinoleoyl-rac-glycerol	0.232238	0.31634	1.09111
4-hydroxy-1-_2-hydroxyethyl_-2266-tetramethylpiperidine	0.31322	0.31745	1.09172
Dl-a-hydroxybutyric acid	0.392314	0.31796	0.63114
12-diamino-2-methylpropane	0.583966	0.3186	1.05268
18.beta.-glycyrrhetinic acid	-0.783841	0.3189	1.04889
Tyramine	-0.464832	0.31914	1.11013
Luffariellolide	0.436825	0.32014	1.12193
2-heptyl-4-hydroxyquinoline n-oxide	0.206908	0.32038	0.886416
Guanosine 35-cyclic monophosphate	0.0249698	0.32111	1.52771
Phenylalanine	0.392293	0.32129	0.938437
Taurochenodeoxycholate	-0.126132	0.32196	1.27347
D-___-mannose	0.404236	0.32201	1.29388
Serine	0.248663	0.32234	0.67166
Hydroxyisocaproic acid	-1.25579	0.32253	1.01852
Erucic acid	-0.2361	0.32298	0.67223
L-leucyl-l-leucine methyl ester	-0.209749	0.32326	1.06076
Nicotinate	-0.202613	0.32342	0.999281
Oxypurinol	-0.245875	0.32344	0.72125
Trp-Pro	-0.199921	0.32364	1.08549
Ser-Val	0.41566	0.32396	0.917819
2-chloro-2-hydroxy-4-methylbenzophenone	-1.26145	0.32456	0.919819
Glu-Val-Arg	0.42301	0.32465	0.834822
Dethiobiotin	0.302864	0.32487	1.02012
12-dioleoyl-sn-glycero-3-phosphatidylcholine	-0.225113	0.32658	1.23299
Flusilazole	0.315037	0.32716	0.88128
33-dimethylglutaric acid	1.14026	0.32805	1.60545
Asn-Val-Lys	0.273163	0.3281	0.941082
Linoleic acid methyl ester	0.326392	0.32875	0.97544
Ingenol	0.247026	0.32877	0.867612
Pentadecanoic acid	-0.367656	0.32911	0.535937
Eriocitrin	0.156894	0.32931	0.539379
Cis-4101316-docosatetraenoic acid	0.568857	0.32971	0.903085
1-o-octadecyl-sn-glyceryl-3-phosphorylcholine	-1.01152	0.33005	0.831511
Ile-Pro	-0.164574	0.33195	0.702727
1-_12-dioctanoylphosphatidyl_inositol-5-phosphate	-0.177789	0.33218	0.955461
Bonactin	-0.235765	0.33479	0.834184
3-hydroxyglutaric acid	0.367943	0.33526	0.887997
Linoleoylcarnitine	-1.57647	0.33534	0.821661
Dehydrocholic acid	0.41171	0.33589	0.867513
Withaferin a	-0.615984	0.33602	1.08064
D-glutamine	0.252331	0.33645	0.908764
Chlormadinone acetate	-0.153088	0.33646	1.01988
5-__z_-14-_35-dihydroxyphenyl_tetradec-10-enyl_benzene-13-diol	-0.530664	0.33837	1.0206
Fucosterol	0.185897	0.33866	1.02173
Urobilin	-0.893448	0.33873	1.01128
2-naphthalenecarboxamide n-__1s_-2-_4-_5-chloro-23-dihydro-2-oxo-1h-benzimidazol-1-yl_-1-piperidinyl_-1-methylethyl_-	0.499871	0.33911	0.897318
Hippuric acid	0.722825	0.33927	0.760992
3-hydroxyphenylacetic acid	0.210571	0.33934	1.19323
2-Deoxy-D-ribose	-0.131284	0.33949	0.800852
Pechueloic acid	-0.384034	0.33966	0.514484
17alpha-ethynylestradiol	0.330254	0.33981	0.855849
All-trans-4-hydroxyretinoic acid	-0.3448	0.34043	0.92802
9-oxo-10e12z-octadecadienoic acid	-0.474973	0.34262	0.989345
Aminohippuric acid	-0.489671	0.34317	0.990848
Pyridoxal	-0.195208	0.3433	1.14244
Calcimycin	-0.245152	0.34362	0.94645
Lys-His	0.852191	0.34373	0.714556
1-palmitoyl-2-_4-ketododec-3-enedioyl_phosphatidylcholine	0.719167	0.34392	0.884778
2-pyrrolidinone 5-__1e3r_-44-difluoro-3-hydroxy-4-phenyl-1-buten-1-yl_-1-_6-_2h-tetrazol-5-yl_hexyl_- _5r_-	-0.253987	0.3444	0.980967
Desmethylcerivastatin	0.489382	0.34482	1.36462
Daidzein	0.48134	0.34599	1.12808
44-methylenebis_26-di-tert-butylphenol_	0.204471	0.34605	1.06116
Methyl indole-3-acetate	-0.227937	0.34674	1.06731
Amantadine	-0.181878	0.34764	1.03278
Guanidoacetic acid	0.751387	0.34805	0.576167
D-allose	1.52787	0.34806	0.798033
Reserpic acid	-0.341879	0.34893	0.85615
Gln-arg	0.403269	0.34911	0.874994
15-ketolatanoprost _free acid_	0.249115	0.35043	0.7618
Dimethylaminopurine	0.534017	0.35112	0.995288
Phenol	0.299077	0.35138	0.622149
Microcystin lr	-0.141039	0.35154	1.0346
Lisdexamfetamine	-0.330034	0.35204	0.939043
Ala-Tyr	0.176602	0.35246	1.06768
Dodecanoic acid	-0.674704	0.3531	0.982481
15-pentanediamine	0.669983	0.35333	0.858045
Fumagillin	-0.105898	0.35384	0.952419
Glu-Asn-Arg	0.186615	0.3539	0.724038
Gln-gln	0.214715	0.35448	0.769515
Fa 18_2_2o	-0.657501	0.35571	1.03363
Val-His-Arg	-0.19847	0.3563	0.823338
Dipivefrine	-0.24476	0.357	0.898533
Cyclobenzaprine n-oxide	-0.452365	0.35721	1.00508
Flavone base _ 3o 2meo o-guaiacylglycerol	-0.513463	0.35776	0.927197
1h-indole-3-propanoic acid	-1.23345	0.35813	0.959911
Nakijiquinone h	-0.461261	0.3587	0.82118
Prostaglandin f2.beta.	0.76844	0.36077	0.755114
.beta.-cryptoxanthin	-0.170828	0.36205	0.967481
Ser-Pro-Lys	0.224806	0.36249	0.8664
Carbobenzyloxyglycylglycyl-l-norleucine	-0.211429	0.36388	0.926391
Phe-Gly-Arg	0.295178	0.36553	0.989004
L-homocitrulline	-0.141455	0.36654	0.915636
Taurodeoxycholic acid	-0.197838	0.36666	0.72413
Lappaconitine	0.42321	0.36672	1.00403
Alanine betaine	0.368191	0.37091	0.887457
6-methylchromone	0.258961	0.37092	0.938485
Podototarin	0.181205	0.37142	0.801824
Chenodeoxycholic acid 24-acyl-.beta.-d-glucuronide	4.96664	0.37243	0.42742
Met-Ile-Arg	-0.194811	0.37312	0.913534
Val-Val-Lys	0.604537	0.37314	0.791702
3.beta.-tetrahydrocortisol 321-diacetate	-0.207008	0.37361	0.872405
Asp-Ala-Arg	-0.128112	0.37525	0.984896
Cephaeline	0.242689	0.37574	1.05713
Dihydroketoprofen	-1.18614	0.37645	0.87749
Oleic acid	0.295641	0.37709	0.923729
N-acetylneuraminic acid	1.20509	0.37754	0.472427
2-lahpda _dmed-fahfa_	-0.559604	0.37884	0.968875
Docosanamide	1.7564	0.37941	0.989713
3-hydroxy-3-methylglutaric acid	0.220711	0.38012	0.917216
1-stearoyl-2-hydroxy-sn-glycero-3-phosphocholine	-1.14215	0.38076	0.79252
Arg-Leu	0.445512	0.38105	0.865664
Neomenthyldiphenylphosphine oxide	-0.311994	0.38264	0.993877
Pyruvate	0.520713	0.38266	1.42478
N-acetyl-l-carnosine	1.32562	0.38291	0.966477
2-hydroxy-6-methoxychalcone	-0.992972	0.38296	0.972249
Thr-Asn-Arg	0.1565	0.38441	0.846273
Pantothenic acid	-0.169085	0.38562	0.914901
1-decanoyl-2-hydroxy-sn-glycero-3-phosphocholine	-0.20025	0.38618	0.738694
4-hydroxymethyl-5-desmethylmeloxicam	0.0225798	0.38632	1.10764
Desferrioxamine	0.202009	0.38701	0.921205
Casticin	0.128358	0.38719	1.01
Terephthalic acid	0.32849	0.38726	0.960298
N-_sec-butyl_-n-_4-_sec-butyl_trifluoroacetyl_amino_phenyl-222-trifluoroacetamide	-0.170926	0.38772	0.771375
Tolmetin	0.697905	0.38822	0.997793
.delta.-tocotrienol	0.312173	0.38904	0.788372
Oleanolic acid	-0.657957	0.38924	1.14302
N-alpha-acetyl-l-lysine	-0.3077	0.39068	0.873735
Spiro_3h-indole-33-pyrrolidine_-1_2h_-acetic acid 5-chloro-1-__5-chloro-2-fluorophenyl_methyl_-225-trioxo-	0.444118	0.3922	1.51716
1h-indole-3-ethanamine 5-methoxy-n-methyl-n-_1-methylethyl_-	-0.439138	0.3922	0.85279
N-oleoylethanolamine	-0.347896	0.39374	0.737004
Cytidine	0.456304	0.39492	0.951231
_3r5r6r7s9s10r13r17r_-17-__r_-5-methoxy-5-oxopentan-2-yl_-1013-dimethylhexadecahydro-1h-cyclopenta_a_phenanthrene-367-triyl triacetate	-0.243206	0.39526	0.828979
Methanone _3-chloro-1-naphthalenyl__1-pentyl-1h-indol-3-yl_-	-0.234828	0.39531	0.893642
Triamcinolone diacetate	-0.136231	0.3957	0.84165
Indoleacetic acid	-0.294954	0.39656	0.795168
Epothilone b	-0.161278	0.39684	0.930395
Cytosine	0.712727	0.39902	0.950051
N5-_1-imino-3-butenyl_-l-ornithine	0.187568	0.39955	0.738193
Acetylaniline	-0.205219	0.40004	0.861321
Thyrotropin-releasing hormone	-0.413302	0.40145	0.834289
Cyclopiazonic acid	-0.100112	0.40147	0.903798
6-sialylgalactose	0.148154	0.4026	0.889067
Gly-Val-Lys	0.229999	0.40347	0.806216
Veratramine	-0.152402	0.40351	0.975449
Gamma-l-glutamyl-l-glutamic acid	-0.0156363	0.40471	0.530145
13s-hydroxy-9z11e15z-octadecatrienoic acid	0.173059	0.40627	0.845452
Clindamycin	-0.311935	0.40675	0.83521
Phe-pro	0.586969	0.4074	0.737964
Diacetoxyscirpenol	-0.258186	0.40768	0.839315
Borrelidin	0.338493	0.40784	1.03612
Butanoic acid	-0.38947	0.40845	0.663941
2-hydroxypalmitic acid	-0.239318	0.40864	0.526705
Diflubenzuron	0.143698	0.40869	0.769545
Destruxin a	-0.395022	0.40884	0.829457
2-mohma _dmed-fahfa_	-0.187814	0.40913	0.846885
Gambogic acid	-0.744995	0.40914	0.943214
Ile-Thr-Arg	0.566489	0.40987	0.828852
Lithocholic acid	1.11882	0.40987	0.621267
D-ribose 5-phosphate	0.48005	0.41022	1.02685
Uridine 5-diphosphogalactose	0.015794	0.41099	0.457276
3-_1h-indol-3-ylmethyl_-618-dimethyl-12-_1-phenylethyl_-915-di_propan-2-yl_-14710131619-heptazacyclotricosane-25811141720-heptone	0.246106	0.41107	0.588804
Asn-Lys	0.397209	0.41151	0.8754
Dihydro-44-dimethyl-23-furandione	0.223985	0.41394	0.586539
Propionic acid	-0.19411	0.41513	0.828345
D-glucose 6-phosphate	0.44997	0.41631	0.917098
7-keto-3.alpha.12-.alpha.-dihydroxycholanic acid	0.236586	0.41632	1.019
Androstendione	-0.181784	0.41711	0.711244
Met-Leu	0.125187	0.41737	0.694034
Val-Phe	0.329819	0.41801	0.699598
Isoanhydroicaritin	0.235291	0.41921	0.508993
Phe-val	0.242436	0.41949	0.836779
Salidroside	0.201183	0.41952	1.25451
Phytolaccagenin	-0.507061	0.41974	1.11163
Androstane-317-diol _3.beta.5.alpha.17.beta._-	0.219902	0.42012	0.825571
Psychosine	-0.272446	0.42086	0.956467
Glu-Lys-Lys	-0.209691	0.42214	0.969611
Ethylmorphine	-0.301987	0.42307	0.90037
Linoleoyl ethanolamide	0.220608	0.42334	0.92275
Met-Met-Arg	0.302823	0.42456	0.978417
Oo-diethyl phosphate	-0.4008	0.42504	0.741401
Ganoderic acid a	0.0542507	0.42592	0.346785
Ketoleucine	-0.965871	0.42633	0.748106
3-aminobutanoic acid	-0.559211	0.42678	0.823088
Monolaurin	0.3809	0.42772	0.724312
Chloramphenicol palmitate	0.713126	0.42802	0.779611
N-phthalyl-l-tryptophan	0.350756	0.42856	1.26976
Val-Val-Arg	0.245818	0.43007	0.693625
Cytidine 3-monophosphate	0.228781	0.43015	0.900836
Erucamide	-0.275803	0.43136	0.788729
12-dilauroyl-sn-glycero-3-phosphatidylcholine	0.143199	0.43188	0.867162
.beta.-damascone	0.254476	0.43344	0.848049
Bis-_acetyl_diaminopentane	2.09123	0.43421	0.691176
Arg-Gly-Asp	-0.435298	0.43493	0.907275
Sulfinpyrazone	-0.549686	0.43576	0.680179
Traumatic Acid	-0.382543	0.43636	0.696223
5-methylcytosine	0.368814	0.43687	0.845553
Quinolinate	0.159841	0.43834	1.06255
Quetiapine	-0.101276	0.43855	0.811505
12-ketodeoxycholic acid	0.357801	0.44035	0.900845
16-phenoxytetranorprostaglandin f2.alpha.	0.153	0.44065	0.701573
3.alpha.7.alpha.-dihydroxy-12-oxocholanoic acid	0.342212	0.44152	0.221584
N-oleoyl-phenylalanine	0.139506	0.44364	0.936874
Azelastine	-0.270591	0.44511	0.719234
1-hydroxy vitamin d2	0.423572	0.44733	0.789362
1-palmitoyl-3-oleoyl-sn-glycero-2-phosphoethanolamine	-0.256117	0.44839	0.462383
Ala-Ala-Arg	0.283396	0.44843	0.769746
Gln-lys	0.413441	0.44906	0.813653
Deoxycholic acid	0.600468	0.44955	0.525047
Beta-hydroxybutyrate	0.758226	0.44958	0.341504
Crocoxanthin	0.0573015	0.44965	0.631278
Palmitoyl 3-carbacyclic phosphatidic acid	0.187237	0.44982	0.82668
3-heptanone 7-_34-dihydroxyphenyl_-5-hydroxy-1-_4-hydroxyphenyl_-	0.43472	0.45023	0.790741
1-palmitoyl-2-linoleoyl-rac-glycerol	-0.653381	0.45074	0.699642
Melezitose	0.0227019	0.45186	1.01037
Beta-alanine	-0.0448449	0.45266	0.527579
Methyltyrosinate	-0.208088	0.4541	0.747221
Malate	-0.20311	0.45461	0.422871
Iprovalicarb	-0.201973	0.45517	0.665164
Adenosine 3-monophosphate	0.816008	0.45735	0.76877
O-desmethylastemizole	0.318936	0.45747	0.358693
Saikosaponin b2	-0.159309	0.45776	0.646545
_3e5s7r8r11e13s15r16r_-357111315-hexamethyl-816-bis_13-oxazol-5-ylmethyl_-19-dioxacyclohexadeca-311-diene-210-dione	-0.201803	0.45826	0.818703
Ser-Thr	0.398554	0.4586	0.847321
Leu-Ala-Lys	0.544553	0.45895	0.652279
Flufenoxuron	-0.503719	0.45917	0.716136
11_12_-epoxy-5z8z14z17z- eicosatetraenoic acid	-0.421126	0.45944	0.431261
Valine	0.249123	0.45991	0.600655
Sebacic acid	-0.278685	0.46053	0.460984
Thymine	0.29169	0.46111	0.860937
D-erythro-sphingosine-1-phosphate	0.52595	0.46217	0.820491
7.alpha.27-dihydroxycholesterol	0.530419	0.46296	0.669453
Gln-leu	0.221258	0.46305	0.711907
N-.alpha.-_tert-butoxycarbonyl_-l-lysine	-0.281631	0.46473	0.710311
3-methyl-2-oxobutyric acid	-0.309165	0.46553	1.22824
17-phenyltrinor-1314-dihydroprostaglandin a2	0.165497	0.46553	0.884042
Cyclohexanesulfamic acid	-1.02274	0.46611	1.00846
Formylanthranilic acid	-0.717775	0.46651	0.634818
Adenosine 5-monophosphate	-0.381997	0.46661	0.858081
5-_2-hydroxyethyl_-4-methylthiazole	0.568902	0.46789	0.79633
Oleic acid methyl ester	-0.681736	0.46831	0.827685
Urocanate	-0.142374	0.46835	0.673631
Protoporphyrin ix	-0.15968	0.4715	0.710795
N-acetyl-l-tyrosine	-0.125954	0.47215	0.536816
Glycochenodeoxycholate	0.937373	0.47252	0.813418
Dibutyl phthalate	-0.215761	0.47265	0.790593
Ala-phe	0.413813	0.47267	0.705774
Thr-Asn-Lys	0.203512	0.47295	0.647557
Quinate	0.81982	0.47361	0.559483
Asn-Leu	0.251387	0.47438	0.696073
Ectoine	0.490145	0.47462	0.681381
Tsugaric acid a	-0.495797	0.47483	0.614031
Leucine	0.361294	0.47496	0.650459
Methylguanidine	-0.6613	0.47664	0.847852
Methyl hexadecanoate	0.287324	0.47722	0.655587
Putative _3-hydroxyhexadecanoyl_glycine _aka commendamide_	0.28712	0.47738	0.689024
Phenylacetic acid	-0.340357	0.47784	0.699768
Benzoic acid	-0.471018	0.47814	0.827752
Boldenone sulfate	0.167488	0.47815	1.04445
Ala-Gln-Arg	0.584424	0.47831	0.697755
Stearidonic acid	-0.32853	0.47858	0.709777
Indole	0.294479	0.47909	1.06668
Turkesterone	-0.280269	0.47996	0.782525
Kanamycin a	-0.0954151	0.482	0.750173
26-di-tert-butyl-4-methoxyphenol	-0.246814	0.48217	0.702419
Asn-Arg	0.216269	0.48497	0.744422
Mestranol	-0.86565	0.48608	0.75374
2-palmitoyl-rac-glycerol	-0.121776	0.48641	0.756608
Brassicasterol	-0.101401	0.48826	0.74532
Isoliquiritigenin	0.514689	0.48914	0.883346
_desmethyl_hydroxycerivastatin	0.754924	0.48954	0.837285
Taurolithocholate	0.461915	0.48956	0.711917
Metyrapone	-0.0730126	0.49034	0.794816
Tomatidin	0.216046	0.49115	0.668755
N-_p-amylcinnamoyl_anthranilic acid	0.113002	0.49116	0.671864
78-dihydro-.alpha.-ionone	0.160456	0.49142	0.777265
Prostaglandin b2	0.139899	0.49211	0.631235
Perifosine	0.366063	0.49267	0.616816
Pro-asn	0.130884	0.49269	0.618091
1-methyluric acid	-0.134638	0.49329	0.541703
Rottlerin	-0.160654	0.49355	0.694674
57-dihydroxy-2-phenyl-6-_345-trihydroxy-6-_hydroxymethyl_oxan-2-yl_-8-_345-trihydroxyoxan-2-yl_chromen-4-one	0.0805954	0.49395	0.284028
Ala-Gln	-0.133197	0.49438	0.716705
Echinocystic acid	-0.821055	0.49469	0.993434
124-dihydroxyvitamin d3	0.64969	0.49643	0.737601
Indinavir	-0.0425802	0.49659	1.14468
Prostaglandin f2.alpha.	0.181624	0.49694	0.893989
Asn-Gln-Lys	0.0644176	0.49699	0.723805
Maltotetraose	0.3347	0.49769	0.452322
Pro-Gly-Pro	-0.193237	0.49797	0.729054
Octanoic acid 2-__4-___11-biphenyl_-4-ylmethyl_amino_-6-chloro-2-pyrimidinyl_thio_-	-0.117418	0.49894	0.640821
1-palmitoyl-2-docosahexaenoyl-sn-glycero-3-phosphocholine	0.332993	0.49968	0.826941
2-hydroxyatorvastatin lactone	-0.19147	0.49973	0.804334
Ile-Leu-Lys	0.122057	0.50006	0.599279
Neolinustatin	-0.116213	0.5003	0.546936
7.alpha.12.alpha.-dihydroxycholest-4-en-3-one	-0.304973	0.50063	0.667678
15-ketoprostaglandin f2.alpha.	-0.0176371	0.50132	0.65031
Pro-pro	-0.513628	0.50434	0.692607
L-tyrosine ethyl ester	-0.317517	0.50485	0.677697
Adenosine 2-monophosphate	0.178818	0.50524	0.516809
Senecionine	0.245011	0.50722	0.586372
N-desbutylbupivacaine	0.369095	0.5084	0.535451
Gly-Leu-Arg	0.0830455	0.50846	0.622611
Xanthine	0.112813	0.51101	0.89554
Daunorubicin	0.288294	0.51167	0.779587
Tauroursodeoxycholic acid	0.442714	0.51172	0.695475
2-deoxyinosine	0.243519	0.51253	0.696871
Acadesine _drug_	0.18201	0.51271	1.04351
Aprepitant	0.558682	0.51286	0.632825
1-_1z-octadecenyl_-sn-glycero-3-phosphocholine	-1.21508	0.51301	0.58086
Pencycuron	0.0738064	0.51372	0.512258
4-pregnen-6.beta.11.beta.1721-tetrol-320-dione	0.0767148	0.51426	0.716691
Pulchinenoside a	-0.151783	0.51533	0.727374
9s11r15s-trihydroxy-20a20b-dihomo-5z13e-prostadienoic acid	0.427186	0.51549	0.538232
Adenosine 35-cyclic monophosphate	0.222296	0.51662	1.26587
D-leucinamide n-__phenylmethoxy_carbonyl_-l-leucyl-n-__1s_-1-formyl-3-methylbutyl_-	0.208411	0.51768	0.666913
D-pyroglutamic acid	-0.157074	0.51779	0.772313
Kukoamine a	-0.223895	0.51908	0.510834
Ala-asp	-0.130792	0.52048	0.125877
3-dehydroepiandrosterone sulfate	0.868821	0.52216	0.1129
2-hydroxy-3-methylbutyric acid	-0.637274	0.52292	0.475814
Ngng-dimethyl-l-arginine	0.0428215	0.52308	0.644027
Tetradecanedioic acid	-0.403117	0.52322	0.602053
1-stearoyl-2-hydroxy-sn-glycero-3-phosphoethanolamine	-0.613595	0.5243	1.0457
D-psicose	-0.338698	0.52488	0.921432
Trandolaprilat	3.21918	0.52601	0.207378
Tri-2-ethylhexyl trimellitate	0.459631	0.52649	0.725783
Prostaglandin e1	1.27314	0.5272	0.47918
Pe_16_0e12-hete_	-0.410895	0.52801	0.238381
Terfenadine	1.21121	0.52879	0.670754
Pi 40_5	0.61013	0.52921	0.578074
Pro-Thr	-0.0538417	0.53016	0.456599
Prostaglandin f1.alpha.	-0.182337	0.53034	0.696556
Betamethasone dipropionate	0.493086	0.53082	0.663629
Val-Glu	0.138571	0.53086	0.606687
Corticosterone	0.580145	0.53173	0.321094
Sulfobacin b	-0.364866	0.53177	0.961171
5-methylbenzotriazole	0.213743	0.53252	0.523505
DL-threonine	0.16758	0.53271	0.636767
5-hydroxy-2-methylpyridine	-0.147997	0.53349	0.726365
Podofilox	0.83603	0.53433	0.776511
Ala-Val-Arg	0.43895	0.53494	0.677955
Phe-tyr	0.165563	0.53551	0.670661
26-dihydroxy 44-dimethoxydihydrochalcone	0.741432	0.53606	0.539779
Dl-.beta.-homoleucine	-0.212284	0.53629	0.743467
Amprenavir	-0.231936	0.53647	0.551024
Trans-vaccenic acid	0.413663	0.53732	0.597615
Pro-Val-Lys	0.20632	0.53746	0.450664
Eurycomalactone	-0.0676198	0.53795	0.696783
2-keto-3-deoxyoctonic acid	-0.0934962	0.53818	1.04609
Thr-Val-Leu	0.503215	0.53841	0.617802
Trandolapril	-0.433546	0.53949	0.561703
17-phenyltrinorprostaglandin f2.alpha. cyclohexylamide	0.0886818	0.54001	0.468267
Gelsemine	-1.33381	0.54021	0.683972
Beclomethasone	-0.0922344	0.54027	0.542952
Empenthrin	0.250044	0.54207	0.581297
Carvedilol	0.0937562	0.54223	0.542143
Imazethapyr	-0.0953981	0.54265	0.745203
Thr-Glu-Lys	-0.257671	0.54361	0.766777
Isoxanthohumol	-0.143949	0.54522	0.663468
2-methoxyestradiol	-0.234935	0.54544	0.581126
L-citrulline	-0.198672	0.54681	0.598384
2578-tetramethyl-2-_.beta.-carboxyethyl_-6-hydroxychroman	0.341843	0.5473	0.31245
N-lauroyl-d-erythro-sphingosylphosphorylcholine	-0.294667	0.54731	0.14174
Eflornithine	0.206749	0.54733	0.531536
P-coumaric acid	0.080572	0.54875	0.491608
_2s3s_-2-_34-dihydroxyphenyl_-357-trihydroxy-6-methyl-23-dihydrochromen-4-one	0.970966	0.54907	0.0312698
Mesoporphyrin ix	1.82968	0.54983	0.393321
Mangiferin	0.133702	0.55099	0.59687
N6N6N6-Trimethyl-L-lysine	0.708776	0.55232	0.636729
Meperidine	-0.160607	0.55282	0.610967
Flumazenil	0.323356	0.55328	0.529446
Cochlioquinone a	0.283114	0.55463	1.24581
1-o-hexadecyl-2-deoxy-2-thio-s-acetyl-sn-glyceryl-3-phosphorylcholine	0.223771	0.55549	0.58522
Mef-glu	1.09741	0.55676	0.18161
Asn-Gln-Arg	0.244912	0.55726	0.543298
Cucurbitacin i	0.0775989	0.55747	0.543376
Crufomate	0.0254075	0.55854	0.468969
Pilocarpine	-0.216673	0.55961	0.557993
Cis-9-palmitoleic acid	-0.186967	0.56048	0.571173
Jasmonic acid	-0.046969	0.56087	0.485902
Azelaic acid	-0.250671	0.56122	0.516314
Cis-hydroxyperhexiline	0.507688	0.56129	0.674703
L-pipecolic acid	0.343402	0.56192	0.569784
.beta.-ecdysone	-0.244863	0.56241	0.573748
Phosphatidylcholine lyso alkyl 16_0	-0.673162	0.56323	0.732506
1h-indole-1-pentanoic acid 3-___1-_aminocarbonyl_-22-dimethylpropyl_amino_carbonyl_-	0.250774	0.56393	0.613258
.gamma.-heptalactone	0.117288	0.56419	0.731333
Coproporphyrin I	-0.222791	0.56515	0.718001
Pyridoxamine	-0.405291	0.56678	0.653427
2-o-methylguanosine	-0.358037	0.5675	0.547752
1-palmitoyl-2-docosahexaenoyl-sn-glycero-3-phospho-_1-rac-glycerol_	-0.0146654	0.56832	0.614754
Equol	-0.770692	0.56918	0.739314
20-hydroxy-4z7z10z13z16z18e-docosahexaenoic acid	0.204221	0.57031	0.899749
_e_-4-__1r2s3s4r8as_-234-trihydroxy-2558a-tetramethyl-344a678-hexahydro-1h-naphthalen-1-yl_but-3-en-2-one	-0.111624	0.57209	0.498804
Oxyacanthine	-0.481485	0.57232	0.752025
Trans-hydroxyperhexiline	-0.203892	0.57234	0.551558
Nelfinavir	-0.167091	0.57239	0.742404
Linoleic acid	-0.210319	0.57266	0.706991
.alpha.-d-galactose 1-phosphate	-0.220771	0.57303	0.234874
Ecgonine	-0.332041	0.57456	0.496308
9-nitrooleic acid	0.86236	0.57509	0.575978
Asn-Pro-Lys	0.181645	0.57609	0.503527
Cinobufagin	0.65051	0.57705	0.475525
Dl-.alpha.-phenylglycine	-0.244449	0.57736	0.602284
2-mohpa _dmed-fahfa_	-0.0514165	0.57762	0.567893
Lys-Met	0.181416	0.57792	0.724744
Gln-Leu-Arg	0.120157	0.57879	0.600357
Benzamide n-_5-_2-_35-dimethoxyphenyl_ethyl_-1h-pyrazol-3-yl_-4-__3r5s_-35-dimethyl-1-piperazinyl_- rel-	-0.184592	0.57886	0.68374
3alpha-Hydroxy-5alpha-androstan-17-one _Androsterone_	-0.147679	0.57943	0.309949
Paroxetine	-0.188072	0.58101	0.64259
12-distearoyl-sn-glycero-3-phospho-_1-rac-glycerol_	0.657556	0.58102	0.974606
6-formylpterin	-0.163776	0.58124	0.252366
Amastatin	-0.160592	0.58283	0.0322817
Dl-lactate	0.168631	0.58285	0.329674
1-palmitoyl-2-hydroxy-sn-glycero-3-phosphoethanolamine	-0.0158356	0.58293	0.514289
10-formyl-78-dihydrofolic acid	0.0760645	0.58365	0.721305
Phe-Leu-Lys	-0.0503535	0.58366	0.60108
Antipain	0.188561	0.58577	0.489623
Wortmannin	0.123148	0.58654	0.65158
Hexadecanedioic acid 331414-tetramethyl-	-0.166211	0.58671	0.156649
1-oleoyl-l-.alpha.-lysophosphatidic acid	0.138999	0.58681	0.499546
Cytisine	-0.515118	0.58764	0.538056
4-hydroxynonenal	-0.0829641	0.58766	0.665605
2-aminoadipic acid	0.0993973	0.58857	0.424018
2-amino-1-phenylethanol	0.287506	0.58908	0.555895
Methanesulfonamide n-_4-__1-_2-_6-methyl-2-pyridinyl_ethyl_-4-piperidinyl_carbonyl_phenyl_-	0.356316	0.58998	1.24003
Trimellitic acid anhydride	-0.209219	0.59	0.0573464
Cis-7101316-docosatetraenoic acid	0.435455	0.59129	1.13539
L-alaninamide n-_2-_2-_hydroxyamino_-2-oxoethyl_-4-methyl-1-oxopentyl_-3-methyl-l-valyl-n-_2-aminoethyl_-	0.366103	0.5914	0.624223
Platensimycin	-0.0756566	0.59226	0.517953
Matairesinol	0.103061	0.59377	0.556053
L-saccharopine	-0.750633	0.5944	0.305482
Kahweol	-0.0861843	0.59541	0.522003
Purine	-0.512574	0.5969	0.658623
Tangeritin	0.563506	0.59896	0.559019
Cnicin	0.185611	0.60075	0.581772
Puromycin	-0.278829	0.60163	0.54925
Lincomycin	-0.122471	0.6017	0.566467
Oleoylserotonin	-0.137364	0.60199	0.578366
.alpha.-tocopheryl acetate	0.301751	0.6028	0.51988
Glu-Val-Lys	-0.213266	0.60294	0.653337
Acetylglycine	-0.0704792	0.6039	0.855172
Dibutyl adipate	-0.225996	0.60406	0.543909
Methionine sulfoxide	0.186558	0.60528	0.605123
2-deoxyadenosine 5-monophosphate	-0.128709	0.60682	0.436474
Gamma-Glu-Cys	-0.319041	0.60725	0.703946
Pseudouridine	-0.093907	0.6075	0.0578561
__4r_-4-__3r5s7r9s10s12s13r14s17r_-3712-trihydroxy-1013-dimethylhexadecahydro-1h-cyclopenta_a_phenanthren-17-yl_pentanoyl_glycylglycine	-0.219265	0.60791	0.609907
Pyrimidifen	-0.1304	0.60791	0.575622
3-methyladenine	-0.0686984	0.60805	0.501503
D-mannitol	0.0924135	0.60814	0.65921
Oleanonic acid	-0.216637	0.60855	0.691279
DL-phenylalanine	0.248604	0.60897	0.522539
Glutathione oxidized	0.332361	0.60921	0.584183
Glycodeoxycholic acid	0.865495	0.60992	0.663653
Sphingosine	0.618896	0.61021	0.590042
7-acetyllycopsamine	-0.101523	0.61031	0.440219
Rhynchophylline	0.208987	0.61091	0.49203
12-dimyristin	0.115663	0.61122	0.43512
12-dipalmitoyl-sn-glycero-3-phospho-_1-myo-inositol_	-0.123855	0.61179	0.508493
N-acetyl-s-geranylgeranyl-l-cysteine	0.215792	0.61273	0.58655
3-quinolinecarboxamide 6-_2-furanyl_-14-dihydro-8-methoxy-4-oxo-1-pentyl-n-tricyclo_3.3.1.1_37__dec-1-yl-	-0.0840353	0.61402	0.552844
Methylmalonic acid	-0.146143	0.6149	0.269854
Ergothioneine	0.11821	0.61517	0.0747946
Adenine	0.15073	0.61566	0.657983
Perospirone	0.235979	0.61825	0.490313
2-o-methyladenosine	-0.220879	0.6189	0.499388
34-dihydroxy-l-phenylalanine	0.101303	0.61898	0.619181
12-dioctadecanoyl-sn-glycero-3-phospho-_1-myo-inositol_	-0.00390577	0.61911	0.000330186
Acetohexamide	0.258903	0.61936	0.650725
Pi 39_4	-0.0564899	0.62164	0.566643
Phenylacetaldehyde	0.249019	0.62184	0.501522
Urushiol ii	-0.131571	0.62186	0.718831
Propanoic acid 2-__4-_2-___cyclohexylamino_carbonyl__4-cyclohexylbutyl_amino_ethyl_phenyl_thio_-2-methyl-	-0.00692723	0.62255	0.47615
Tyr-Leu	-0.259269	0.62583	0.741814
68-dihydroxy-2244-tetramethyl-7-_3-methylbutanoyl_-9-_2-methylpropyl_-9h-xanthene-13-dione	-0.0577655	0.62605	0.17728
Saccharopine	-0.0619474	0.62613	0.592804
Octadecamethyloctasiloxane	-0.272945	0.62918	0.37847
Chenodeoxycholate	0.429722	0.62921	0.531754
Phe-Asn-Arg	0.112338	0.62922	0.415006
Ala-Ala-Lys	-0.145328	0.62931	0.518319
Tetrahydrocorticosterone	0.103072	0.62968	0.597649
15.beta.-hydroxycyproterone acetate	0.257336	0.6313	0.493121
Gly-Pro-Glu	-0.125562	0.63243	0.591382
12-Distearoyl-sn-glycerol 3-phosphate_PA_18_018_0__	-0.0443978	0.63529	0.122651
Indolelactic acid	-0.00359634	0.63607	0.528257
Dibucaine	0.0751662	0.63632	0.51782
15-keto-17-phenyltrinorprostaglandin f2.alpha.	-0.067838	0.63806	0.305366
N-_4-fluorobenzoyl_-5-amino-1h-indole	-0.107912	0.63852	0.497726
8s-hydroxy-5z9e11z14z-eicosatetraenoic acid	-0.414348	0.63916	0.557935
Leu-Gly-Leu	0.361247	0.63919	0.495464
Palmitoylserinol	-0.0842665	0.64037	0.471475
Metaflumizone	-0.614312	0.6412	0.405619
DL-Lysine	-0.241612	0.64157	0.511616
_-_-caryophyllene oxide	-0.210771	0.64258	0.346152
Leu-Ala	0.0574403	0.64361	0.459119
Enterodiol	-0.339839	0.64378	0.550889
Val-Thr-Arg	0.221751	0.6442	0.511517
Probucol	-0.208625	0.64487	0.778182
Bisindolylmaleimide i	0.0900682	0.64507	0.61993
1.alpha.-methyl-5.alpha.-androstan-3.alpha.17.beta.-diol glucuronide	-0.130348	0.64619	0.812079
Hematoporphyrin	-0.133401	0.64824	0.0218158
Swainsonine	-0.0898405	0.64858	0.554775
.gamma.-nonalactone	0.163781	0.64929	0.343401
2-amino-3-_hydroxy-_2-hydroxy-3-_octadec-9-enoyl_oxypropoxy_phosphoryl_oxypropanoic acid	-0.243325	0.64941	0.378624
Deoxycholic acid methyl ester	-0.0854078	0.64968	0.23463
Behenic acid	-0.842212	0.64998	0.367039
Moxifloxacin	0.525807	0.65087	0.266048
Asn-Gly-Lys	0.136636	0.65288	0.471607
Tris_2-chloropropyl_ phosphate	0.114112	0.65469	0.353303
11-ketofusidic acid	-0.0843646	0.65515	0.519249
Phe-phe	0.07448	0.65611	0.576466
Tyr-Thr	0.223885	0.65683	0.488096
Glyceric acid	0.135586	0.65707	0.062201
5.alpha.-cholest-7-en-3.beta.-ol	-0.0641996	0.65882	0.455878
His-Lys	-0.106882	0.65894	0.509426
Taurocholate	-0.195322	0.65911	0.448521
Benzoylnorecgonine	-0.206368	0.65976	0.752529
5-aminovaleric acid betaine	0.38459	0.65983	0.483421
Esfenvalerate	-0.180466	0.66239	0.300142
Xanthosine	0.200522	0.66321	0.878521
Agaric acid	0.253669	0.66717	0.358035
4-amino-n-_tert-butyl_benzamide	-0.215978	0.6681	0.317635
Carbenoxolone	0.411639	0.66845	0.0700756
Butachlor esa	-0.13101	0.66935	0.452705
Phe-Glu-Arg	-0.0426336	0.66947	0.473743
Mevalonic acid	-0.0254938	0.66959	0.665701
Glu-Thr-Arg	0.112916	0.66963	0.332839
Ser-Gly-Lys	0.166179	0.66977	0.394382
9-oxo-11-_3-pentyl-2-oxiranyl_-10e-undecenoic acid	-0.0949016	0.67011	0.434639
Hydroxygardnutine	-0.185797	0.67058	0.335136
Obacunone	-0.0527437	0.67084	0.566216
Lithocholylglycine	0.105156	0.67238	0.339684
Limaprost	0.376658	0.67242	0.595408
Acetylcholine	-0.138053	0.67324	0.38852
Glimepiride	1.4778	0.67337	0.415892
His-Met	-0.318993	0.67393	0.262907
Oligomycin b	0.13035	0.67505	0.400782
Coenzyme q2	1.33206	0.67565	0.498363
Pro-Trp	0.860367	0.67592	0.506821
Ursolic acid methyl ester	-0.269753	0.67675	0.299621
Prednisolone phosphate	0.23504	0.67719	0.389941
L-palmitoylcarnitine	-1.77451	0.67827	0.483788
Ricinoleic acid	-0.354777	0.67838	0.587595
Lys-Phe-Lys	0.76422	0.67986	0.556269
Taurolithocholic acid sulfate	-0.0705202	0.67992	0.117994
Tiamulin	-0.0907749	0.67997	0.448507
1-oleoyl-sn-glycero-3-phosphoethanolamine	0.00395806	0.68004	0.402824
N6-methyladenine	-0.125586	0.68073	0.311655
Marbofloxacin	-0.0618977	0.6811	0.411029
N-acetylhistidine	0.00455465	0.68261	0.371033
Telmisartan	0.0714546	0.68296	0.692665
Thr-Phe	-0.0892305	0.68421	0.519337
Bufotalin	-0.362212	0.68463	0.450259
Bilobol	-0.917375	0.68505	0.589502
7_s_17_s_-dihydroxy-8_e_10_z_13_z_15_e_19_z_-docosapentaenoic acid	0.166937	0.68559	0.349442
_glu1_ trh	0.0275608	0.68563	0.783169
Galacto-n-biose	-1.20604	0.68599	0.233699
Harmane	0.215634	0.68623	0.339598
Montelukast	-0.36274	0.68654	0.325381
.alpha.-ionone	-0.0871613	0.68661	0.39894
1-oleoyl-sn-glycero-3-phosphocholine	-0.178653	0.68663	0.308569
1-hexadecanoyl-2-sn-glycero-3-phosphate	0.183252	0.68796	0.0758403
Gossypol	-0.00945445	0.68951	0.36556
Furametpyr	-0.057275	0.68979	0.293082
1-_12r-dioctanoylphosphatidyl_inositol-34-bisphosphate	0.0695002	0.69243	0.191237
Icariside ii	-0.445031	0.69642	0.238537
Ethynylestradiol 17-.beta.-d-glucuronide	-0.00451568	0.69668	0.359851
Pyroglu-His-Arg	0.0199474	0.69669	0.409373
6-ketoprostaglandin f1.alpha.	1.16891	0.6971	0.345983
Bisoprolol	0.17172	0.69789	0.332894
Dl-normetanephrine	0.215015	0.69844	0.346361
_S_-2-Hydroxyglutarate	0.0249616	0.69892	0.00602297
Benalaxyl	0.224354	0.70059	0.259424
Lys-Glu	-0.149375	0.70078	0.641503
Pseudopelletierine	0.123556	0.70095	0.304997
2-fucosyllactose	0.183989	0.70137	0.240871
7-_3-__2r3r4r_-34-dihydroxy-4-_hydroxymethyl_oxolan-2-yl_oxy-45-dihydroxy-6-_hydroxymethyl_oxan-2-yl_oxy-3-_4-methoxyphenyl_chromen-4-one	-0.0423387	0.70186	0.265178
Lasiocarpine	-0.0926693	0.70191	0.609379
12-dimyristoyl-sn-glycero-3-phosphoethanolamine	0.286549	0.70206	0.395924
Vitamin k1	0.415143	0.70295	0.258101
Gln-Leu-Lys	0.355592	0.70296	0.346168
N-tigloylglycine	0.0232009	0.70353	0.14437
N-methylparoxetine	0.687189	0.70402	0.37583
5.alpha.-androstan-3.beta.-ol-17-one sulfate	0.0920039	0.70419	0.551347
Mulberroside a	1.03758	0.70443	0.501935
Gramine	0.0712505	0.70526	0.449708
Bispyribac	0.190802	0.70583	0.346972
Inosine	-0.113696	0.70607	0.480174
Alanine	0.0710942	0.70619	0.466017
Quillaic acid	-0.434466	0.7065	0.292688
Echinocystic acid 3-glucoside	0.0191923	0.70669	0.392454
Thr-Ile	-0.0464819	0.70822	0.485287
1.alpha.-methyl-5.alpha.-androstan-3.alpha.-ol-17-one glucuronide	-0.291805	0.70856	0.287456
Picroside ii	-0.179971	0.70866	0.416645
15_r_19_r_-hydroxyprostaglandin f1.alpha.	0.470426	0.7105	0.038948
3-__cholamidopropyl_dimethylammonio_-1-propanesulfonate	0.0968686	0.71064	0.351537
Lisinopril _8rs_-diketopiperazine	-0.118368	0.71135	0.41867
Leu-Gln	0.0378363	0.71185	0.416579
1-oleoyl-2-myristoyl-sn-glycero-3-phosphocholine	-0.0523249	0.71448	0.378902
Hydroferulic acid	-0.875517	0.71492	0.285991
2-despiperidyl-2-_5-carboxypentylamine_repaglinide	-0.407155	0.71493	0.24965
13-hydroxy-9z11e-octadecadienoic acid	0.258829	0.71519	0.306708
Riboflavin	0.0180909	0.71675	0.497498
Phe-met	0.114349	0.71741	0.36417
15-cyclohexylpentanorprostaglandin f2.alpha.	-0.102398	0.71773	0.230066
Bufalin	0.1942	0.71797	0.479647
Ascorbyl stearate	-1.77421	0.71947	0.30782
Phe-asn	0.174368	0.71971	0.414358
5.alpha.-androstan-3.alpha.17.beta.-diol-o-3-.beta.-glucuronic acid	-0.100918	0.72045	0.164562
Isoproterenol	-0.034338	0.7205	0.264681
17-phenyltrinorprostaglandin d2	0.137162	0.72095	0.530703
2-deoxycytidine	0.0200519	0.72131	0.58307
Pyrrolidine	0.00323503	0.72177	0.500701
Methopterine	-0.399498	0.72205	0.660232
Pro-Glu	0.110648	0.72283	0.258577
.gamma.-dodecalactone	0.0891734	0.72312	0.407745
1-hexadecanoyl-2-octadecadienoyl-sn-glycero-3-phosphocholine	-0.341133	0.72327	0.202607
Gly-Ile-Arg	-0.572226	0.72344	0.290757
N-acetyltyramine	-0.069642	0.72358	0.511933
L-hydroxyarginine	0.229794	0.7243	0.489676
5-o-acetyl-_r_-lisofylline	0.134758	0.72432	0.267197
5-aminovaleric acid	0.19574	0.7255	0.507528
4-methylphenol	-0.485384	0.72735	0.577846
Glu-Lys	0.351559	0.72817	0.491215
11-dehydrothromboxane b2	0.636625	0.72884	0.208107
Costunolide	-0.294102	0.72937	0.307088
Arenobufagin	-0.476131	0.72984	0.662194
Asn-Ile-Lys	-0.0227079	0.73027	0.497004
Hirsuteine	0.106044	0.73042	0.395506
Kukoamine b	0.128285	0.73081	0.281666
13s-hydroxy-9z11e-octadecadiene-_2-biotinyl_hydrazide	0.360448	0.73137	0.392811
__2r3s4s5r6s_-6-_35-dihydroxy-4-_3-_4-hydroxyphenyl_propanoyl_phenoxy_-345-trihydroxyoxan-2-yl_methyl 345-trihydroxybenzoate	-0.335901	0.73242	0.550119
Pi 34_0	-0.132246	0.73312	0.354633
Lobaric acid	0.153043	0.73345	0.671462
4-imidazolidineheptanoic acid 3-__2-cyclohexyl-2-hydroxyethyl_amino_-25-dioxo-1-_phenylmethyl_-	0.0906314	0.73442	0.0298246
1314-dihydro-19_r_-hydroxyprostaglandin e1	-0.285296	0.73534	0.895419
_-_-quebrachitol	-0.314501	0.73578	0.467636
D-ribulose 5-phosphate	0.822861	0.73677	0.456694
Phe-Ser-Lys	-0.124285	0.73876	0.50196
Arg-Val	0.242329	0.73931	0.272813
346-trimethoxyisoflavone-7-o-.beta.-d-glucopyranoside	-0.537751	0.74012	0.201239
Saccharin	-0.572941	0.74055	0.0311948
_1s4as7s7as_-7-hydroxy-7-methyl-1-__2s3r4s5s6r_-345-trihydroxy-6-__4-hydroxybenzoyl_oxymethyl_oxan-2-yl_oxy-4a567a-tetrahydro-1h-cyclopenta_c_pyran-4-carboxylic acid	-0.230984	0.7419	0.280898
.alpha.-tocopherol nicotinate	-0.01411	0.74206	0.254163
1-o-hexadecyl-2-o-acetyl-sn-glyceryl-3-phosphoryl_nnn-trimethyl_hexanolamine	0.0127428	0.74377	0.423666
15s-hydroperoxy-11z13e-eicosadienoic acid	0.0495103	0.74388	0.211366
Dl-threonine methyl ester	-0.104468	0.74512	0.555869
Andrastin a	-0.0815459	0.74635	0.269339
.alpha..alpha.-trehalose 6-phosphate	-0.009498	0.74694	0.448557
15-deoxy-goyazensolide	0.520994	0.74762	0.497895
Leu-Met	0.0938385	0.74808	0.319758
12-benzenedicarboxylic acid	0.325848	0.7485	0.766168
Gln-Glu-Arg	0.101151	0.74992	0.227223
L-methionine	0.164892	0.75014	0.280487
sn-Glycerol 3-phosphoethanolamine	-0.0317109	0.75125	0.0895903
Thiamine	-0.159606	0.75196	0.46065
Pantothenate	0.141517	0.75212	0.0131761
Dl-4-hydroxy-3-methoxymandelic acid	0.33933	0.75215	0.1801
Phe-ile	-0.179945	0.7526	0.340456
Leukotriene d4 methyl ester	0.0419644	0.75342	0.252624
Pristimerin	-0.0789206	0.75348	0.216757
2-hydroxy-3-_3-hydroxy-3-methylbutyl_naphthalene-14-dione	0.258752	0.75349	0.25923
Deoxyguanosine	-0.0257396	0.75413	0.529601
Feruloyl putrescine _isomer of 1178_	0.382628	0.75441	0.29467
C.i. acid blue 90	0.317444	0.75505	0.253774
Doxorubicin	0.0194447	0.75508	0.349722
Allantoic acid	-0.0963125	0.75885	0.315302
Dihydroxyacetone phosphate	0.348477	0.75887	0.328659
Anethole	-0.0111282	0.75931	0.250878
Dimethyl azelate	0.0353826	0.75972	0.272035
N-.alpha.-_tert-butoxycarbonyl_-l-histidine	-0.0849213	0.76035	0.253088
3-methoxyprostaglandin f1.alpha.	0.665434	0.7621	0.17489
Phosphatidylethanolamine	-0.176225	0.76311	0.383722
N-acetyl-d-galactosamine	0.257594	0.76316	0.237812
3-hydroxy-4-methoxycinnamic acid	0.664811	0.76341	0.169135
_2r3r4r6ar6bs8as11r12r12as14br_-2312-trihydroxy-46a6b111214b-hexamethyl-8a-__2s3r4s5s6r_-345-trihydroxy-6-_hydroxymethyl_oxan-2-yl_oxycarbonyl-1234a56789101112a1414a-tetradecahydropicene-4-carboxylic acid	-0.0101544	0.76419	0.13453
Lys-Glu-Lys	-0.12139	0.76454	0.440708
Tyr-Ile	-0.119557	0.76498	0.348584
5-methoxytryptamine	0.0823967	0.76562	0.353251
Diazinon	0.168635	0.76627	0.222849
910-dihydroxy-12z-octadecenoic acid	0.0267634	0.76715	0.193343
Captopril	0.944887	0.76781	0.319749
4-hydroxybenzyl alcohol	-0.118584	0.76797	0.408012
.gamma.-aminobutyric acid	0.130919	0.76851	0.385223
.alpha.-cyclohexylmandelic acid	-0.0213694	0.76896	0.304601
Torularhodin	0.0828186	0.76949	0.451455
Phe-leu	0.0470383	0.77	0.0642122
Chitobiose	0.183788	0.77172	0.329278
Isopropyl dodecylfluorophosphonate	-0.0590636	0.77211	0.357076
Menaquinone 4	0.0378309	0.7726	0.610185
Indalone	-0.0668844	0.77421	0.44259
.alpha.-hederin	0.105757	0.77652	0.244122
Colchiceine	0.0274866	0.77725	0.388931
8_9_-epoxy-5z11z14z-eicosatrienoic acid methyl ester	-0.405189	0.77781	0.307662
Isodeoxycholic acid	0.577954	0.77792	0.0132011
N-acetyltryptophan	0.065378	0.77797	0.137045
N.epsilon.-acetyl-l-lysine	0.137945	0.77848	0.351517
Z-ligustilide	0.102985	0.77934	0.149037
Palmitoyl sphingomyelin	0.330191	0.77992	0.399509
1-palmitoyl-2-myristoyl-sn-glycero-3-phosphocholine	-0.0473478	0.78062	0.294126
1-hexadecyl-sn-glycero-3-phosphocholine	-1.36929	0.78116	0.260305
Leu-Leu-Tyr	0.00572974	0.78126	0.364825
Phe-Val-Arg	0.011236	0.78184	0.298881
Deoxycytidine	-0.0877824	0.78185	0.161258
Atglistatin	0.00136328	0.78194	0.230367
_z_-5811-trihydroxyoctadec-9-enoic acid	-0.0269948	0.78228	0.16135
3-cmp	0.44577	0.7826	0.444524
Dodecanedioic acid	-0.00576224	0.78338	0.259046
1-heptadecanoyl-sn-glycero-3-phosphocholine	0.0739451	0.78405	0.244076
Biotin	-0.0785529	0.78435	0.292433
Tazarotenic acid	0.0665932	0.78465	0.37741
Gly-Phe-Arg	-0.532572	0.7849	0.233226
.beta.-muricholic acid	0.168126	0.78502	0.428976
R-palmitoyl-_2-methyl_ ethanolamide	-0.0678492	0.78512	0.415484
Arg-Leu-Lys	0.101141	0.78576	0.352215
Oxymorphone	0.0791101	0.78595	0.372768
Enoxacin	0.140458	0.78624	0.400834
Glu-Thr-Lys	0.115444	0.78656	0.234735
Undecanedioic acid	0.0249014	0.78733	0.364522
2-lahma _dmed-fahfa_	0.230021	0.78747	0.270771
.delta.-6 testosterone enanthate	0.035387	0.78773	0.18513
Ginkgolide b	-0.03735	0.78778	0.287329
Fumonisin b1	0.0485507	0.78863	0.44181
DL-arginine	1.07475	0.78945	0.409327
Norfloxacin	0.137419	0.78949	0.746754
L-carnosine	0.0701412	0.79009	0.171893
N-glycolylneuraminic acid	0.209144	0.79035	0.257353
Germacrone	-0.0941957	0.7904	0.10728
34-dihydroxyhydrocinnamic acid	-0.0860265	0.79067	0.738474
Arachidoyl ethanolamide	1.83145	0.79211	0.385827
Norharmane	0.0096642	0.79383	0.371238
5-methyl-2-deoxycytidine	-0.153182	0.79428	0.266265
Val-Trp	0.10241	0.79621	0.200178
Thr-Ser-Lys	-0.141478	0.79761	0.392701
Gly-Phe	0.93615	0.79817	0.0337739
Menthyl salicylate	-0.093731	0.799	0.23725
Benzamide 4-_acetylamino_-n-_2-aminophenyl_-	0.10863	0.8005	0.157022
Ala-Met-Arg	0.160328	0.80072	0.271993
N-acetyl-d-glucosamine	0.199017	0.80312	0.364574
Glu-Ile-Lys	-0.0873691	0.80364	0.361743
3-_3-Hydroxyphenyl_propanoic acid	-0.113047	0.80367	0.386733
1-methyladenosine	-0.0249576	0.8037	0.298446
Gln-glu	0.163915	0.80394	0.866519
2-naphthalenol 1-__24-dimethylphenyl_azo_-	-0.00404926	0.80415	0.249712
_5e_-349-trihydroxy-2-propyl-234789-hexahydrooxecin-10-one	-0.00200546	0.80643	0.266437
Pantethine	-0.448678	0.80684	0.17862
Glutamic acid	0.0403421	0.80817	0.430819
Uric acid	-0.0596172	0.81011	0.344902
Oleana-19_11_-dien-28-oic acid 2-cyano-312-dioxo- methyl ester	0.388025	0.81028	0.220938
12-dilinoleoylglycerol	0.0571226	0.81096	0.233791
Gardenin b	0.0271156	0.81124	0.154364
Didodecyl 33-thiodipropionate	0.0176004	0.81236	0.210802
15-diazabicyclo_4.3.0_-non-5-ene	0.0531857	0.81254	0.135416
_e_-2-_hydroxymethyl_-3-_3-oxo-5-propan-2-yl-4567-tetrahydro-1h-2-benzofuran-4-yl_prop-2-enoic acid	0.0243075	0.81275	0.885001
Lys-Gln	-0.0251995	0.81324	0.312502
Dinor-12-oxophytodienoic acid	-0.0706835	0.81393	0.137606
D-glucosamine 6-sulfate	0.992621	0.81407	0.611349
Cis-vaccenic acid	0.125802	0.81623	0.264912
1-stearoyl-2-linoleoyl-sn-glycero-3-phosphoethanolamine	-0.177169	0.81834	0.153035
Fa 18_1_3o	-0.0805046	0.81869	0.244925
Fahfa 36_3	0.102957	0.81902	0.0374938
1-octadecanoyl-2-octadecenoyl-sn-glycero-3-phosphocholine	-0.0519898	0.81961	0.388444
1-behenoyl-2-hydroxy-sn-glycero-3-phosphocholine	-0.27709	0.81975	0.391049
O-succinyl-l-homoserine	-0.0420358	0.82012	0.1891
Triamcinolone acetonide	-0.105813	0.82022	0.082902
.alpha.-ergocryptine	0.226604	0.82028	0.354608
Ursocholic acid	2.52844	0.82235	0.343686
Glycocholic acid	0.0951706	0.82331	0.293382
Pro-Asn-Arg	-0.112717	0.82492	0.378342
Tobramycin	-0.570594	0.82523	0.317049
13-hydroxy-4z7z10z14e16z19z-docosahexaenoic acid	-0.0618349	0.82575	0.0981865
10-hydroxydecanoate	-0.472961	0.82639	0.294815
Np-000062_6_	-0.0711253	0.82684	0.307041
Diisodecyl phthalate	-0.0612259	0.82693	0.22054
3-_trifluoromethyl_benzoic acid	0.150861	0.82714	0.0632656
L-homoarginine	-0.0390464	0.82721	0.295296
N-acetylglutamine	-0.120163	0.83044	0.687996
Isopentenyladenine	0.120746	0.83136	0.103466
3-hydroxybutyric acid	-0.024943	0.83229	0.1562
Glutaric acid	0.18547	0.83237	0.750482
Fulvestrant 9-sulfone	-0.371514	0.83306	0.0800168
Opipramol	-0.0519625	0.83387	0.345419
1-pentadecanoyl-sn-glycero-3-phosphocholine	0.500992	0.83401	0.133822
4-pyridoxic acid	-0.0195188	0.83454	0.301071
___-.gamma.-tocopherol	-0.0470678	0.835	0.106637
Jasplakinolide	0.880915	0.83514	0.626336
3-hydroxystanozolol glucuronide	-0.0160948	0.83518	0.206022
12-dipalmitoleoyl-sn-glycero-3-phosphoethanolamine	0.179779	0.83685	0.186865
Terragine e	-0.083598	0.83691	0.268523
N-caffeoyl-o-methyltyramine	-0.133733	0.83735	0.0944966
Lasalocid	-0.0773292	0.83748	0.623833
Pyrazino_12_16_pyrido_34-b_ indole-3-propanoic acid 1234671212a-octahydro-9-methoxy-6-_2-methylpropyl_- 14-dioxo- 11-dimethylethyl ester _3s6s12as_-	-0.476536	0.83767	0.403323
5-L-Glutamyl-L-alanine	0.0406616	0.83814	0.478065
Parthenolide	-0.33526	0.83874	0.175378
Juglone	0.0123944	0.83983	0.152144
Lys-Asn	-0.0923978	0.84028	0.357582
Ala-Val-Lys	0.139104	0.84035	0.131829
N-oleoylglycine	0.281091	0.84036	0.052834
L-fucose-1-phosphate	-0.737182	0.84045	0.599441
1-_2-nitrobenzylidenamino_-24-imidazolidinedione	1.35962	0.84056	0.239507
11-hydroxy-.delta.9-tetrahydrocannabinol	-0.239325	0.84188	0.656435
Zerumbone	-0.0186683	0.84203	0.0122826
25-hydroxycholesterol	0.200839	0.84221	0.191075
Clethodim	-0.0327338	0.84275	0.214877
Acetylcitrulline	0.0434289	0.84312	0.120082
4-pregnen-17.alpha. 20.beta.-diol-3-one-20-sulfate	0.0955733	0.84324	0.20035
Betaine	0.737316	0.84334	0.0988544
Uridine	-0.192191	0.84361	0.221211
Mundulone	0.015996	0.844	0.0746818
N-_13-dihydroxyoctadec-4-en-2-yl_tetradecanamide	-0.0680676	0.84542	0.140637
1-pyrrolidineheptanoic acid 2-__1e3s4s_-3-hydroxy-4-methyl-1-nonen-6-yn-1-yl_-5-oxo- _2r_-	0.327556	0.84544	0.126759
2-methoxy-5-methylphenol	-0.304807	0.84576	0.180134
Ala-Pro	0.0899667	0.84667	0.198276
Aspartame	-0.0131339	0.84686	0.164139
15-ketoiloprost	-0.167349	0.84918	0.72149
Astemizole	-0.02596	0.84974	0.224455
Epoxiconazole	-0.0476531	0.84974	0.0934276
Talatisamine	0.117598	0.85051	0.124793
_3r7r9s10s12s13r14s17r_-17-__2r_-67-dihydroxy-6-methylheptan-2-yl_-1013-dimethylhexadecahydro-1h-cyclopenta_a_phenanthrene-3712-triol	0.0591385	0.85143	0.27539
Deoxyadenosine	-0.0850609	0.8518	0.318672
Arg-Pro-Pro	0.0263622	0.85266	0.16082
Fuziline	0.0366799	0.85293	0.597109
Colchicine	0.151134	0.85296	0.178126
.beta.-estradiol 317-disulfate	-0.360647	0.85405	0.320604
Ser-Phe	0.0948352	0.85475	0.249213
Trans-traumatic acid	-0.208456	0.8552	0.314711
4-fluoro-.alpha.-pyrrolidinobutiophenone	-0.00109142	0.85604	0.0491965
S-methyl-5-thioadenosine	0.268038	0.85651	0.122168
N-.alpha.-_tert-butoxycarbonyl_-l-valine	-0.268239	0.8575	0.0928207
_1-acetyloxy-3-hydroxy-68a-dimethyl-7-oxo-3-propan-2-yl-23a48-tetrahydro-1h-azulen-4-yl_ 4-hydroxybenzoate	0.479156	0.85768	0.213645
Choline	0.621606	0.85817	0.358574
15-deoxy-delta-1214-pgj2	-0.75544	0.85998	0.0918167
L-glutamic acid dimethyl ester	-0.00103162	0.86012	0.302194
Arg-Trp-Arg	-0.0103152	0.86071	0.29521
Euphodendroidin n	-0.0235527	0.86072	0.340298
12-di-_9z12z15z-octadecatrienoyl_-sn-glycero-3-phosphocholine	0.101079	0.86168	0.254809
Withanolide b	-0.00712849	0.86219	0.0451764
Trihydroxycholestanoic acid	-0.114603	0.86236	0.391985
N-_dodecanoyl_sphing-4-enine	0.284496	0.86289	0.133615
Thr-Ala	0.0206229	0.86374	0.207402
7.alpha.17.alpha.-dimethyl-5.beta.-androstane-3.alpha.17.beta.-diol glucuronide	-0.218786	0.86449	0.359037
Trp-Arg-Arg	-0.147996	0.86827	0.181309
D-ribose	-0.251016	0.86845	0.110218
Pyroglu-thr-lys	-0.0262308	0.86888	0.230911
20-hydroxyarachidonic acid	1.33145	0.8691	0.27182
2-hydroxyatrazine	1.35781	0.87048	0.255802
___-.alpha.-tocopherol	-0.0556589	0.87111	0.0934445
Phe-met-arg-phe-amide	-0.15472	0.87121	0.491234
Allyl 3-amino-1-piperidinecarboxylate	-0.0346721	0.87163	0.0596515
Cis-4710131619-docosahexaenoic acid	0.0435471	0.87184	0.114118
Ser-Arg	0.358555	0.87401	0.259135
Asn-Leu-Arg	0.357734	0.87485	0.13114
Alisol a	-0.0145458	0.87577	0.0879477
Val-Tyr	0.0510435	0.8765	0.162603
L-alaninamide n-_2-_2-_hydroxyamino_-2-oxoethyl_-4-methyl-1-oxopentyl_-3-_2-naphthalenyl_-l-alanyl-	-0.0183848	0.87724	0.0233772
Arg-Pro-Arg	0.0445358	0.8774	0.189875
Dhas18	-0.0685902	0.87894	0.219565
5-heptenoic acid 7-__1r2r3s5s_-2-__1e3s_-3-_23-dihydro-1h-inden-2-yl_-3-hydroxy-1-propen-1-yl_-3-fluoro-5-hydroxycyclopentyl_- _5z_-	-0.150346	0.879	0.246002
Acamprosate	0.0184758	0.87959	0.290644
Orcinol .beta.-d-glucoside	-0.27627	0.88006	0.0532314
1-palmitoyl-2-oleoyl-3-linoleoyl-rac-glycerol	-0.0681778	0.8802	0.0648552
Corilagin	-0.317894	0.88024	0.208479
Uridine 5-monophosphate	0.789485	0.88142	0.243109
Lupulone	0.118292	0.88188	0.135641
Angeloylgomisin h	0.172746	0.88295	0.00257389
3-methyl-2-buten-1-ol	0.116402	0.88315	0.144148
Beta-estradiol 3-_beta-d-glucuronide_	-0.253874	0.88331	0.316561
Hypaconitine	0.0977666	0.88425	0.206632
_2s3r4as12br_-234a8-tetrahydroxy-12b-_5-hydroxy-6-methyloxan-2-yl_oxy-3-methyl-24-dihydrobenzo_a_anthracene-1712-trione	0.110919	0.88476	0.0486228
Madecassic acid	-0.356369	0.88531	0.0844276
L-norvaline	0.206573	0.88586	0.0118927
3.beta.-hydroxy-5-cholestenoic acid	0.252202	0.88597	0.176906
2-mohpda _dmed-fahfa_	0.103847	0.88849	0.182073
Phenaceturic acid	0.0752456	0.88903	0.666741
Paxilline	-0.030605	0.88912	0.157302
DL-proline	0.267926	0.88967	0.104169
Asn-Ala-Lys	-0.0878066	0.89063	0.183996
Benzyl butyl phthalate	0.526114	0.89114	0.197638
L-pyroglutamic acid	0.0539677	0.89121	0.664728
2-piperidone	0.164232	0.8916	0.199629
9-hydroperoxy-10e12z15z-octadecatrienoic acid	0.0193931	0.8918	0.147429
Arg-asp	0.04522	0.89181	0.182087
Val-Thr	-0.0422999	0.89238	0.182494
Corosolic acid	-0.252618	0.89301	0.018443
Pe_18_01920-epdpe_	0.177945	0.89325	0.0609393
Nn-diethyltryptamine	-0.0208635	0.89348	0.197262
4-nitrosodiphenylamine	-0.0833778	0.89368	0.24048
Monolinolenin _9c12c15c_	-0.0603542	0.89448	0.264775
Dilinolenin _9c12c15c_	-0.469858	0.89484	0.233471
Hydroquinidine	-0.174801	0.89579	0.614871
Proline	0.0667082	0.89583	0.258399
4-cholestenone	0.0893307	0.89616	0.223366
D-erythrose 4-phosphate	0.520691	0.89635	0.237941
Arachidonic sulfonic acid	-0.0955906	0.89868	0.234536
N-acetylserine	-0.184612	0.8993	0.433633
1-_1-_1-methylcyclooctyl_-4-piperidinyl_-2-__3r_-3-piperidinyl_-1h-benzimidazole	-0.172621	0.90019	0.193721
Linoleoylglycine	0.0676211	0.90034	0.144491
Dodeca-2_e_4_e_-dienoic acid	-0.131473	0.90113	0.0338617
Caulophyllogenin	-0.282013	0.90136	0.0915636
Pro-Glu-Arg	0.131067	0.90242	0.207333
Ile-Trp	0.107329	0.9026	0.276524
Guanine	-0.0611089	0.90355	0.356932
1213-dihydroxy-9z-octadecenoic acid	-1.09152	0.90565	0.418656
Damp	-0.195001	0.90684	0.267439
14-d-xylobiose	0.25053	0.90761	0.252199
Ciscis-muconic acid	-0.165996	0.90766	0.662026
Chlorhexidine	0.0532078	0.90817	0.17073
Dihydrocapsaicin	-0.083397	0.90878	0.0309992
Val-Gly-Val	0.108716	0.91015	0.0199869
Tandutinib	0.106898	0.91072	0.11378
Bata-hydroxypyruvic acid	-0.347166	0.91133	0.0394902
Phosphonic acid p-__3r_-3-amino-4-__3-hexylphenyl_amino_-4-oxobutyl_-	-0.139741	0.91336	0.134704
N-palmitoyl-d-sphingosine	-0.0381085	0.91392	0.136633
Rosmarinic acid	0.0869599	0.91478	0.198736
N-_octadecanoyl_sphing-4-enine-1-phosphocholine	0.269097	0.91488	0.511416
_z_-3-_4-hydroxyphenyl_-n-_4-___e_-3-_4-hydroxyphenyl_prop-2-enoyl_amino_butyl_prop-2-enamide	0.065681	0.91625	0.0841588
Monopalmitolein _9c_	0.175412	0.91636	0.0489887
3-hydroxyrepaglinide	0.250884	0.91655	0.321602
Desogestrel	-0.256906	0.91826	0.0993741
Pro-Asp	0.081956	0.9184	0.167766
Theobromine	0.0929376	0.92006	0.202254
Pro-Ala-Arg	0.0166668	0.92049	0.0878248
Chloroquine	0.272414	0.92107	0.0310439
Oleyloxyethylphosphorylcholine	0.0999158	0.92117	0.0597255
Benzoximate	0.321964	0.92211	0.0223312
Lumichrome	0.0257081	0.92421	0.148751
N-acetylputrescine	0.305231	0.92425	0.00890979
Cimetidine	0.0880876	0.92481	0.0405371
Pro-Ile-Arg	-0.0112631	0.92572	0.189316
Benzalkonium chloride _c12_	0.461857	0.92667	0.0196064
N-_tetracosanoyl_sphing-4-enine-1-phosphate	-0.125012	0.92677	0.271484
Retigabine	0.197423	0.92686	0.112405
Kukoline	-0.0672399	0.92711	0.0414444
Octadecanoic acid	-0.172547	0.92754	0.308819
Methotrexate	-0.0448586	0.92886	0.0196665
1-palmitoyl-2-oleoyl-sn-glycerol	0.086895	0.9294	0.094067
Herbacetin-38-diglucopyranoside	0.136313	0.92951	0.142505
G2f	-0.0389664	0.9298	0.179418
Epinephrine	0.0118515	0.92999	0.10059
Agmatine	0.260261	0.93024	0.0113215
Pro-Trp-Lys	0.083139	0.93213	0.0370738
Harringtonine	0.0621444	0.9323	0.183896
9-deoxy-9-methylene-1616-dimethylprostaglandin e2	-0.10735	0.93285	0.126214
Leukotriene d4	-0.802985	0.93408	0.0901047
Cyclopentolate	-0.0107909	0.93711	0.0835376
Palmitic acid alkyne	-0.137112	0.93767	0.0845718
Pyroglu-Ile	0.165753	0.93806	0.124352
5.alpha.-pregnan-3.alpha.17-diol-20-one 3-sulfate	0.463356	0.93813	0.265859
Nobiletin	0.332223	0.93857	0.0533421
Arg-Tyr	0.00336421	0.9386	0.321457
Polygodial	-0.094591	0.9399	0.172481
.beta.-sitosterol	0.164795	0.94066	0.0421628
Luminespib	0.13578	0.94096	0.176785
.beta.-amyrin acetate	-0.144448	0.94133	0.233196
Tetrahydroalstonine	1.21585	0.94194	0.0524676
Ganoderic acid h	-0.115654	0.94195	0.258947
18.alpha.-glycyrrhetinic acid	-0.0937991	0.9424	0.148856
Cymarin	-0.0182769	0.94387	0.191159
12-dioleoyl-sn-glycerol	-0.0161991	0.94396	0.198268
Prostaglandin b3	-0.017407	0.9474	0.107866
Benzoic acid 3-___3-carboxycyclohexyl_amino_carbonyl_-4-_3-_4-_4-phenoxybutoxy_phenyl_propoxy_-	0.236022	0.94907	0.177014
Tyr-Asn	-0.106414	0.95017	0.0658471
N-acetylsphingosine	0.0450948	0.95031	0.142299
Maresin 1	-0.339035	0.95042	0.12984
N-_9-oxodecyl_acetamide	-0.101493	0.95063	0.0895585
Tartronate	0.187365	0.95114	0.376093
Ala-Glu-Arg	0.190839	0.95249	0.0686968
Tsas9	-0.0425984	0.95266	0.67127
Deoxynivalenol 3-glucuronide	-0.05612	0.95348	0.0343056
Myo-inositol	0.342198	0.95441	0.291227
Sarcosine	0.020089	0.95557	0.203455
Trp-Gly-Trp	-0.0693338	0.95602	0.142382
Brazilin	-0.130712	0.95612	0.367359
Pyridoxine	0.0798432	0.95654	0.169377
_2r_-3-hydroxyisovaleroylcarnitine	0.0844166	0.9568	0.0510681
Pentasaccharides _hex-hex-hex-hex-hex_	-0.593738	0.95706	0.282479
D-Maltose	-0.0760958	0.95766	0.453745
Asn-Asp	-0.0878341	0.95828	0.574156
3-AMP	0.2246	0.95884	0.362955
___-6-aminopenicillanic acid	0.0310857	0.95998	0.0497507
1-palmitoyl-2-lauroyl-sn-glycero-3-phosphorylcholine	-0.0164989	0.96317	0.141369
Oxeladin	-0.0468968	0.96454	0.0483649
Glycocholate	0.0697507	0.9646	0.0195237
2-linoleoylglycerol	-0.19343	0.96532	0.0346302
Propanoic acid 2-__1-_3-_4-__11-biphenyl_-4-ylcarbonyl_-2-propylphenoxy_ propyl_-1234-tetrahydro-5-quinolinyl_oxy_-2-methyl-	0.0894063	0.9664	0.158011
Glucose 1-phosphate	0.230966	0.9671	0.246393
Heptadecasphinganine	0.265939	0.96749	0.0187352
Histidine	0.0331654	0.96998	0.499819
5-hydroxy-6e8z11z14z17z-eicosapentaenoic acid	-0.0786893	0.97016	0.0633338
11s-hydroxy-5z8z12e14z-eicosatetraenoic acid	0.0830211	0.97194	0.446534
Cannabinol	-0.130658	0.97209	0.0472986
.gamma.-l-glu-.epsilon.-l-lys	-0.151779	0.97288	0.0937849
7-methyladenine	0.0850192	0.97319	0.0700773
Irbesartan	-0.22526	0.97837	0.0116235
Trimethoprim	0.268852	0.97851	0.0977113
Prostaglandin d1	1.15287	0.97947	0.0635958
Methanone _6-hydroxy-1-_2-_4-morpholinyl_ethyl_-1h-indol-3-yl_-1-naphthalenyl-	0.0259317	0.9811	0.278218
Arg-glu	-0.0381628	0.98189	0.00772559
3-hydroxybenzaldehyde	0.0503485	0.98201	0.402601
Pterosin a	-0.435642	0.98229	0.0127861
Ile-Thr	0.0340577	0.98511	0.115824
Cohumulone	-0.0275394	0.98532	0.290017
Oxymorphone 3-.beta.-d-glucuronide	-0.0101619	0.98559	0.0269955
His-ser	0.17308	0.98801	0.367393
13-keto-9z11e-octadecadienoic acid	0.149762	0.98858	0.0951171
Valerenic acid	-0.0767846	0.98858	0.0116768
Gly-pro-arg-pro-amide	0.0776565	0.98872	0.0442493
2-oxoadipic acid	0.060797	0.98907	0.118466
Nocardamine	-0.979139	0.99039	0.492426
Met-Met	0.00244612	0.99108	0.0238936
Beta-D-Fructose 6-phosphate	0.526738	0.99165	0.318326
5_s_14_r_-lipoxin b4	0.703199	0.9932	0.0592501
Linolenic acid	-0.209661	0.99366	0.0494995
12-naphthoquinone	-0.0740484	0.99399	0.0930785
Cafestol	0.0684327	0.99409	0.0983058
Trans-4-_aminomethyl_cyclohexanecarboxylic acid	0.0866233	0.9943	0.0653404
Met_o_-Glu-Lys	0.00146585	0.99447	0.0759822
L-Fucose	-0.00714599	0.99545	0.100129
Thr-Asp	0.0875097	0.99563	0.468904
1-hexadecyl-2-_9z-octadecenoyl_-sn-glycero-3-phosphoethanolamine	0.0405096	0.99611	0.366543
Sulfoacetic acid	0.101792	0.9964	0.081196
Lys-Lys-Lys	0.0210637	0.99721	0.0397061
.beta.-tocotrienol	-0.0355047	0.99727	0.17424
4-ketopimelic acid	0.0976871	0.99747	0.176174
.alpha.-L-Glu-L-Asp	0.119032	0.99748	0.371682
