# Supplementary material for: Multi-omics investigation of spontaneous T2DM macaque emphasizes gut microbiota could up-regulate the absorption of excess palmitic acid in the T2DM progression
Source: bioRxiv preprint, doi:10.1101/2024.10.17.618794, version 3 (2025-07-17)
Supplement: Table S4 [file 618794_file16.xlsx]

## Sheet: pos
ID	m/z	rt(s)	PPM	Name	adduct	HMDB	KEGG	SuperClass	Class	SubClass	rtmax	npeaks	control	QC	T2DM	maxint	MT01	MT02	MT03	MT04	MT05	MT06	MT07	MT08	Control1	Control2	Control3	Control4	Control5	Control6	Control7	Control8	QC-1	QC-2	QC-3	RSD	QCRSD
M472T352_1	472.181	351.621	9.7514	10-formyl-7,8-dihydrofolic acid	[M+H]+	HMDB0006485	C03204	Organoheterocyclic compounds	Pteridines and derivatives	Pterins and derivatives	363.896	12	8	0	2	4833	30813.3	28976	24433.7	36258.4	48070.3	36059.8	30481.6	42693.7	22185.4	23942	29789.8	35606.3	24150	29510.4	56145.4	28464.2	25717.9	26582.3	25731.1	0.019042	0.019042
M409T199	409.357	199.084	8.34886	1-[1-(1-methylcyclooctyl)-4-piperidinyl]-2-[(3r)-3-piperidinyl]-1h-benzimidazole	[M+H]+						200.802	17	6	3	8	23217	16622.6	38014.2	7161.93	13912.5	25196	32570.5	15541	25980.1	80832.6	15440.1	27197.8	9822.97	18144.5	20670.9	9321.73	18383.8	29108.3	30217.8	29114.9	0.0216646	0.0216646
M689T483	689.229	483.367	7.02937	1-(1,2-dioctanoylphosphatidyl)inositol-5-phosphate	[M+Na]+			Lipids and lipid-like molecules	Glycerophospholipids	Glycerophosphoinositol phosphates	496.026	15	7	1	3	11019	10821.3	11860.8	12563.4	7200.21	44717.8	8273.64	6727.21	5134.94	15053.7	28367	12979.9	13467.2	5231.26	12723.7	21270	11031.4	12884.9	14044	12752.6	0.0537146	0.0537146
M480T182_1	480.36	182.241	9.29519	1-(1z-hexadecenyl)-sn-glycero-3-phosphocholine	[M+H]+	HMDB0010407		Lipids and lipid-like molecules	Glycerophospholipids	Glycerophosphocholines	182.677	14	6	1	7	426564	39750.9	62780.4	50201.5	25944.5	63056.8	13126.5	352461	216916	248369	234570	59216.7	153816	63612.7	53224.5	1.14077e+06	21164.5	139819	139775	136656	0.0130715	0.0130715
M508T178	508.388	178.315	1.92596	1-(1z-octadecenyl)-sn-glycero-3-phosphocholine	[M+H]+	HMDB0013122		Lipids and lipid-like molecules	Glycerophospholipids	Glycerophosphocholines	179.223	14	9	1	4	713796	59183.5	132049	38852.2	35761.7	83991.8	12639	414382	411411	66769.7	226663	82781.8	241691	78183.1	68918.4	1.73385e+06	17527.5	165711	171075	165551	0.0187764	0.0187764
M297T72	297.253	72.018	2.29725	12(13)-epoxy-9z-octadecenoic acid	[M+H]+	HMDB0004702		Lipids and lipid-like molecules	Fatty Acyls	Fatty acids and conjugates	73.964	19	6	3	9	940247	1.95158e+06	4.40456e+06	500726	637324	3.66048e+06	781471	4.29778e+06	9.08721e+06	513331	747151	6.58147e+06	3728.02	32835.1	2.47425e+06	712750	4.76102e+06	2.14146e+06	2.31916e+06	2.32039e+06	0.0455459	0.0455459
M381T87	381.33	86.7595	5.52335	1,24-dihydroxyvitamin d3	[M+H-2H2O]+		C12919	Lipids and lipid-like molecules	Steroids and steroid derivatives	Vitamin D and derivatives	106.841	26	6	3	7	34523	152081	259295	28196	104552	25577.7	37975	119621	90326.3	77984.6	63313.8	26392.2	149844	35777.2	32784.5	100528	47756.6	74918.1	78134.3	78438.2	0.0252776	0.0252776
M779T141_1	778.552	141.077	7.89292	1,2-di-(9z,12z,15z-octadecatrienoyl)-sn-glycero-3-phosphocholine	[M+H]+	HMDB0008206		Lipids and lipid-like molecules	Glycerophospholipids	Glycerophosphocholines	143.086	15	8	1	2	18680	13037.3	11472.7	16733.7	33788.1	11925.3	5391.11	17550.9	28547.6	12599.4	44228	7758.01	17696.6	13281.9	14173.7	11499.3	8457.43	26003.9	25980.7	26963.5	0.0213114	0.0213114
M72T299	72.0832	298.565	5.40223	1,2-diamino-2-methylpropane	[M+H-NH3]+			Organic nitrogen compounds	Organonitrogen compounds	Amines	305.401	14	6	3	5	18704	36599.1	67312.7	24366.9	28997.9	156540	47325.6	45354.1	45819.6	43255.8	23434.1	52459.5	41464.2	30442.4	40845.7	28912.4	33754.8	44111.5	43120	44086.7	0.0129176	0.0129176
M184T140	184.079	139.71	1.53792	1,2-dilauroyl-sn-glycero-3-phosphatidylcholine	[M+H-C27H50O4]+			Lipids and lipid-like molecules	Glycerophospholipids	Glycerophosphocholines	142.43	27	8	3	8	60762	88268.6	101809	345453	157128	57795.4	68078.9	98579.2	247953	25156.8	196396	89540.9	131543	62750.7	88367.6	345433	24819.5	173534	174893	173527	0.00452088	0.00452088
M600T31	599.522	31.158	4.7361	1,2-dilinoleoylglycerol	[M+H-H2O]+			Lipids and lipid-like molecules	Fatty Acyls	Lineolic acids and derivatives	36.99	12	6	1	5	246938	184661	169097	179795	317061	167694	136970	151086	50403	162285	182660	79654.8	247741	276464	107283	170622	46719.8	184031	182687	184027	0.00421954	0.00421954
M495T37_3	495.449	36.944	6.25193	1,2-dimyristin	[M+H-H2O]+			Lipids and lipid-like molecules	Glycerolipids	Diradylglycerols	49.455	14	9	1	3	37582	77890.9	68469.2	136902	28922.1	30554.1	72121.5	69534.7	23600.5	26351	142737	40614.9	59746.7	57499.5	80477.8	44827.2	6183.84	88396	84740	86943	0.0212335	0.0212335
M636T150_1	636.475	150.191	0.340912	1,2-dimyristoyl-sn-glycero-3-phosphoethanolamine	[M+H]+			Lipids and lipid-like molecules	Glycerophospholipids	Glycerophosphoethanolamines	151.894	12	8	1	3	26697	41585.6	48530.2	129989	110123	19182.9	17991.1	29431.2	22505.5	16316	38612.7	17202.2	57856.9	60429	75997	19429.4	30693.2	50769.7	51460.7	50758.6	0.00788662	0.00788662
M495T79_1	495.457	79.386	9.95164	1,2-dimyristoyl-sn-glycerol	[M+H-H2O]+	HMDB0007008		Lipids and lipid-like molecules	Glycerolipids	Diradylglycerols	81.232	11	4	1	6	14479	39357.8	49741.8	156903	81067	5798.43	66894.6	62404	12708.5	105533	146752	35727	81457.7	181883	108764	26210.8	69830.2	95369.6	89049.9	95326.3	0.0389955	0.0389955
M339T35_2	339.3	35.002	7.98081	1,2-dioleoyl-sn-glycerol	[M+H-C18H34O2]+	HMDB0007218		Lipids and lipid-like molecules	Glycerolipids	Diradylglycerols	37.005	20	10	2	8	331721	639036	633286	258189	669782	467657	505556	583590	392072	435480	718056	317818	556226	591674	295743	915052	284421	490780	489624	459515	0.0369327	0.0369327
M689T138_1	688.506	137.942	8.44486	1,2-dipalmitoleoyl-sn-glycero-3-phosphoethanolamine	[M+H]+	HMDB0008957		Lipids and lipid-like molecules	Glycerophospholipids	Glycerophosphoethanolamines	151.658	24	7	1	4	13230	29846	37279.4	76819.5	55548.7	11511.6	33177.7	36362.9	99513.8	32195.6	61414.9	29215.2	41195.9	54495.7	64599.6	16317.1	22641.7	45452.3	44936.1	45462.9	0.00664936	0.00664936
M391T127	391.299	126.629	6.01066	12-ketodeoxycholic acid	[M+H]+	HMDB0000328		Lipids and lipid-like molecules	Steroids and steroid derivatives	Bile acids, alcohols and derivatives	129.305	16	5	2	7	200885	567357	1.68e+06	230004	54278.5	373659	91149.3	102670	1.97429e+06	110074	63727	115648	988508	45715.3	99071.1	2.24875e+06	84685.2	591238	591531	592614	0.00122411	0.00122411
M159T331	159.049	330.906	5.92522	1,2-naphthoquinone	[M+H]+		C14783	Benzenoids	Naphthalenes	Naphthoquinones	332.29	22	10	3	8	6941	4512.12	6055.18	14711.6	8257.78	1827.83	6095.11	7654.62	3446.21	14645.7	11723.8	2092.74	3319.57	7866.31	4227.35	7084.17	2547.34	6419.57	6016.05	6009.93	0.0381816	0.0381816
M266T243	266.108	243.332	4.96711	1-(2-nitrobenzylidenamino)-2,4-imidazolidinedione	[M+NH4]+			Organoheterocyclic compounds	Azolidines	Imidazolidines	246.43	17	9	1	7	64085	12870.3	25679	24645.4	15587.2	522801	84275.4	12606.6	23629.4	52243.2	94233.8	19648.9	18965.6	20485.3	45607.6	14559.3	22435.7	109814	74680.2	110203	0.207647	0.207647
M263T39	263.184	39.121	6.97175	12s-hydroxy-5z,8e,10e-heptadecatrienoic acid	[M+H-H2O]+	HMDB0012535	C20388	Lipids and lipid-like molecules	Fatty Acyls	Fatty acids and conjugates	59.911	15	5	3	6	529908	21626	883221	6465.98	29431.4	1.3687e+06	55640.3	35546.4	11697.3	749495	21264.6	2.65144e+06	35182.2	68690.7	1.75211e+06	1.08259e+06	15969.8	27593.4	27491.4	31381.9	0.076931	0.076931
M295T52	295.236	52.368	7.9887	13-keto-9z,11e-octadecadienoic acid	[M+H]+	HMDB0004668		Lipids and lipid-like molecules	Fatty Acyls	Lineolic acids and derivatives	53.412	20	8	3	9	970299	4.94007e+06	1.74216e+06	628280	623236	1.56364e+06	998201	2.37639e+06	8.05576e+06	360668	1.13058e+06	5.6938e+06	2.49086e+06	945996	2.58075e+06	1.39766e+06	4.04049e+06	2.23333e+06	2.23278e+06	2.32453e+06	0.0233317	0.0233317
M277T37	277.224	36.9705	3.39228	13s-hydroxy-9z,11e,15z-octadecatrienoic acid	[M+H-H2O]+			Lipids and lipid-like molecules	Fatty Acyls	Lineolic acids and derivatives	38.818	16	8	0	7	543841	1.65307e+06	923221	641920	681103	682019	634425	814614	413331	347709	1.05981e+06	989727	60504.6	874213	1.02413e+06	1.03967e+06	191813	984779	979589	984769	0.00304522	0.00304522
M519T34_1	519.321	33.722	5.22536	13s-hydroxy-9z,11e-octadecadiene-(2-biotinyl)hydrazide	[M+H-H2O]+						56.628	12	6	1	5	134775	163375	109923	72652.5	255451	56561.6	112466	18695.6	8853.91	112506	81597.1	49832.1	103228	73206.6	49803.6	88188.7	54337.7	93006	94160.9	93006.8	0.00713686	0.00713686
M305T273	305.093	273.142	7.15501	1,4-d-xylobiose	[M+Na]+		C01630	Organic oxygen compounds	Organooxygen compounds	Carbohydrates and carbohydrate conjugates	288.188	31	10	1	8	108874	42015.4	21028.5	174047	147637	391820	29320.3	13881	65332.8	18072.8	46694.5	107481	77361	50869.4	27970.2	299553	36236.9	78758.6	77319.2	78744.3	0.0105648	0.0105648
M433T59_1	433.186	59.222	7.98237	15.beta.-hydroxycyproterone acetate	[M+H]+			Lipids and lipid-like molecules	Steroids and steroid derivatives	Pregnane steroids	60.228	22	6	1	7	11319	39999.2	19351.6	15378.5	79452.9	17564.7	13062.2	23269.8	17466.4	17371.8	16883.4	19394.1	17025.8	11279.4	31378.2	10552.4	55583.8	35586.9	37314.8	35580.3	0.0276399	0.0276399
M339T234	339.202	234.222	4.6113	15-deoxy-delta-12,14-pgj2	[M+Na]+	HMDB0005079	C14717	Lipids and lipid-like molecules	Fatty Acyls	Eicosanoids	243.15	20	7	3	9	171610	34113.1	11547.4	113748	61624.7	77900.5	55334.5	28171.7	28450.1	495547	64174.3	11083.9	13442.9	30597.2	25695.5	47543.8	20539	63053	67164.8	63181.2	0.0362641	0.0362641
M284T127	284.339	127.387	7.20341	15-deoxy-goyazensolide	[M+K]+			Organoheterocyclic compounds	Lactones	Gamma butyrolactones	128.635	21	10	2	9	34149	186426	44556.1	40395.4	43691.9	131496	61296.3	22493.1	135634	47906.7	54842.9	68956	49369.3	74764.7	55983.2	64825.7	50578.2	87651.4	80661	80558.1	0.049013	0.049013
M159T201	159.095	200.64	7.37302	1,5-diaminonaphthalene	[M+H]+		C19463				201.696	14	7	3	4	3575	4333.1	4667.92	4300.82	6371.86	11601.7	6411.63	7480.44	4782.23	7738.73	6569.26	10684.8	12531.6	15520.9	11741.1	3541.43	5531.41	7338.74	7241.45	8561.36	0.0953574	0.0953574
M125T216	125.111	215.573	8.43769	1,5-diazabicyclo[4.3.0]-non-5-ene	[M+H]+						216.774	22	10	3	9	9914	27092	32364.7	38194.5	22724.6	15892.9	43214	24948.8	26034.7	39386.1	30330.1	23474.8	17139.1	25699.4	30059.1	17137.9	30391.7	27413.5	27415	27769.3	0.007446	0.007446
M387T36_1	387.194	36.3815	3.8389	15-keto-17-phenyltrinorprostaglandin f2.alpha.	[M+H]+			Lipids and lipid-like molecules	Fatty Acyls	Eicosanoids	37.005	18	8	2	8	6778102	6.17423e+06	7.77801e+06	7.50057e+06	5.46824e+06	8.33726e+06	5.11104e+06	6.58199e+06	6.85805e+06	6.02933e+06	7.08417e+06	5.91063e+06	7.70573e+06	6.42834e+06	5.88685e+06	8.86146e+06	6.45271e+06	8.20207e+06	8.20027e+06	7.92891e+06	0.0193814	0.0193814
M335T57	335.228	56.649	7.65417	15-ketoprostaglandin f2.alpha.	[M+H-H2O]+	HMDB0004240		Lipids and lipid-like molecules	Fatty Acyls	Eicosanoids	72.958	17	8	1	6	54658	241974	136388	100584	62986.4	82886.4	72451.6	480340	493834	162937	98682.8	359871	163665	142905	174401	295995	235294	228867	246984	228410	0.0451287	0.0451287
M86T255_2	86.0999	254.831	9.44412	1,5-pentanediamine	[M+H-NH3]+	HMDB0002322	C01672	Organic nitrogen compounds	Organonitrogen compounds	Amines	265.14	29	10	3	8	458698	827931	612264	565843	2.46424e+06	645367	2.23105e+06	879589	210167	606187	388764	539434	551792	475629	859945	515316	951889	739645	741818	739653	0.00169169	0.00169169
M323T34_2	323.264	33.723	4.3635	15s-hydroperoxy-11z,13e-eicosadienoic acid	[M+H-H2O]+			Lipids and lipid-like molecules	Fatty Acyls	Eicosanoids	38.97	11	6	1	4	43262	74844.2	90836.1	72875.6	81294.5	31964.8	173054	122142	72484.3	74697.2	74670.2	96131	120968	83725.4	119152	11699	86851.5	106873	116770	106737	0.0522465	0.0522465
M375T235	375.194	234.971	2.91886	16.alpha.,17,21-trihydroxypregna-1,4-diene-3,11,20-trione	[M+H]+			Lipids and lipid-like molecules	Steroids and steroid derivatives	Hydroxysteroids	241.585	13	4	2	7	7709	10341.7	35764.9	23532.3	12158.6	8154.4	15905.5	31676.1	8423.38	68499.5	42771.8	14149.8	21394	29450.4	35519.4	36411.4	15309.3	20342.8	20318.6	19237.3	0.0316236	0.0316236
M297T220	297.179	220.082	7.10321	17alpha-ethynylestradiol	[M+H]+	HMDB0001926	C07534	Lipids and lipid-like molecules	Steroids and steroid derivatives	Estrane steroids	221.595	15	6	3	6	31231	97376.7	157679	39507.9	211096	78681.1	316800	95621.2	87805.1	373137	33232	62452	156195	98717.1	70909.6	39113.6	34349	152885	91922.5	90449	0.318828	0.318828
M343T285_2	343.217	285.137	8.01242	17-keto-4(z),7(z),10(z),13(z),15(e),19(z)-docosahexaenoic acid	[M+H]+			Lipids and lipid-like molecules	Fatty Acyls	Fatty acids and conjugates	292.957	13	8	1	4	3454	10313.3	11145.8	19460.9	18292.5	18581.2	25129.5	12383	7163.66	12976	22954.3	12852.7	9671.57	14186.2	17034.6	2967.54	2091.57	11467.7	10337.4	11462.7	0.0587171	0.0587171
M452T289	452.325	289.038	0.203263	17-phenyltrinorprostaglandin f2.alpha. cyclohexylamide	[M+H-H2O]+			Lipids and lipid-like molecules	Fatty Acyls	Eicosanoids	292.327	16	8	1	6	6269	28687.3	53780.8	33629.6	31639.8	11578	55378.4	22617.4	15242.5	83030.1	22227.7	25181	18821.2	24823.4	26461.8	1847.51	33019.5	33805.1	31004.7	33833.3	0.0494211	0.0494211
M471T37_2	471.357	36.968	1.4408	18.alpha.-glycyrrhetinic acid	[M+H]+			Lipids and lipid-like molecules	Prenol lipids	Triterpenoids	38.922	11	6	0	5	65709	116666	89648.7	112249	310824	123883	119891	200844	76993	49961.9	395687	150061	153582	82646.2	63855.7	185672	119421	143573	143597	136281	0.0298779	0.0298779
M321T419	321.164	419.327	6.34826	18-carboxydinorleukotriene b4	[M+H-H2O]+			Lipids and lipid-like molecules	Fatty Acyls	Fatty acids and conjugates	422.405	16	9	1	6	16890	17093.1	8312.32	64297.6	21695.3	12833.7	10560.4	19343.5	12236.4	11875.1	39495.9	19110.1	26032	39017.2	17825.5	12618.3	38064.9	22715.1	22562	22591.3	0.00359173	0.00359173
M503T241_2	503.265	241.337	8.74626	1.alpha.-methyl-5.alpha.-androstan-3.alpha.-ol-17-one glucuronide	[M+Na]+						243.939	11	6	1	4	12889	60246.6	25946.5	42229.8	57315.7	13371.8	12959.7	38530.9	33721.4	13793.4	47334.3	28615.8	26579.4	46189.4	33472.1	112005	20238	33706.7	33959	33679.7	0.00455919	0.00455919
M102T398	102.058	398.2	1.24898	1-aminocyclopropanecarboxylic acid	[M+H]+	HMDB0036458	C01234	Organic acids and derivatives	Carboxylic acids and derivatives	Amino acids, peptides, and analogues	400.916	22	10	3	9	41051	63037.9	99037.8	63555.1	84495	58984.3	110555	170382	111561	93783.3	99700.7	115032	124673	74884.4	128319	82352.1	114230	92719.2	93267.4	92138.4	0.00609022	0.00609022
M534T176	534.398	176.355	8.4995	1-arachidoyl-2-hydroxy-sn-glycero-3-phosphocholine	[M+H-H2O]+	HMDB0010390		Lipids and lipid-like molecules	Glycerophospholipids	Glycerophosphocholines	179.644	11	7	0	4	11868	2857.37	8433.96	10054.1	6858.61	4985.09	6798.09	22848	21083.6	6488.06	19157.7	14081.9	13169.4	6413.09	6440.64	39545.6	11153.1	11607.1	11771.5	11602	0.00827037	0.00827037
M580T182_2	580.455	181.85	4.81192	1-behenoyl-2-hydroxy-sn-glycero-3-phosphocholine	[M+H]+	HMDB0010398		Lipids and lipid-like molecules	Glycerophospholipids	Glycerophosphocholines	182.677	11	4	1	6	10069	5688.54	8338.78	8207.81	4976.01	20752.7	2627.96	3409.84	15110.9	7540.71	18046.5	2927.65	5149.81	8754.91	1951.44	34581.6	1431.81	9212.74	8886.73	8887.93	0.0208849	0.0208849
M532T501	532.32	500.993	8.19185	1-heptadecanoyl-sn-glycero-3-phosphocholine	[M+Na]+	HMDB0012108		Lipids and lipid-like molecules	Glycerophospholipids	Glycerophosphocholines	505.345	11	7	1	3	1571	17608	19832.7	6244.91	15232.7	18949.2	17613.6	15690.1	14795	19574.1	7367.93	18704.6	16537.3	6527.21	18201.7	13181.3	16485.2	15604.8	14948.5	15603	0.0245975	0.0245975
M759T141	758.587	141.085	2.06218	1-hexadecanoyl-2-octadecadienoyl-sn-glycero-3-phosphocholine	[M+H]+			Lipids and lipid-like molecules	Glycerophospholipids	Glycerophosphocholines	142.874	17	7	1	3	619581	350447	524170	1.24059e+06	1.24668e+06	821808	66924.3	717926	2.31248e+06	215229	1.10177e+06	490905	1.23067e+06	1.38088e+06	466778	3.32782e+06	274626	1.44119e+06	1.44706e+06	1.44706e+06	0.00234469	0.00234469
M482T197	482.375	196.504	4.38565	1-hexadecyl-sn-glycero-3-phosphocholine	[M+H]+			Lipids and lipid-like molecules	Glycerophospholipids	Glycerophosphocholines	197.435	13	5	1	7	528785	60035	25888.4	15826.5	10151	188422	17187.2	377688	184308	320039	61940.2	15114.1	124469	20206.4	33761.7	1.50129e+06	6729.08	201021	104944	202925	0.330296	0.330296
M463T148	463.259	147.627	2.19574	1h-imidazole-1-acetamide, n-[2-(cyclohexylamino)-1-(2-methylphenyl)-2-oxoethyl]-n-(3-fluorophenyl)-2-methyl-	[M+H]+			Organic acids and derivatives	Carboxylic acids and derivatives	Amino acids, peptides, and analogues	148.936	16	6	2	8	42629	49601.2	55470.2	48793.7	39171	32037.6	88062.4	113589	37500.8	100011	138860	243968	69189.3	49340.9	125152	88838.6	220036	113084	104742	104745	0.0447837	0.0447837
M396T324	396.204	324.15	9.95289	1h-indole-1-pentanoic acid, 3-[[[1-(aminocarbonyl)-2,2-dimethylpropyl]amino]carbonyl]-	[M+Na]+			Organic acids and derivatives	Carboxylic acids and derivatives	Amino acids, peptides, and analogues	330.947	13	5	3	5	11170	10486.2	12314	17435.2	14370.5	53795.2	19644.3	11604.2	19973.1	18395.8	5985.72	34105	16659.8	12682.6	11026.8	10371	18582.2	14808.2	13614	13620	0.0490736	0.0490736
M190T153	190.104	153.396	9.92145	1h-indole-2-carboxylic acid, ethyl ester	[M+H]+			Organoheterocyclic compounds	Indoles and derivatives	Indolecarboxylic acids and derivatives	154.839	19	10	3	6	18363	32953	54483.6	24138.1	69683.2	22112.6	69113.9	103543	28147.7	31569.9	37801.9	173845	81548.9	240224	79003.8	48542.8	40567.9	62658.4	63730.2	64071.5	0.0116144	0.0116144
M375T218_1	375.203	217.894	3.5909	1h-indole-3-carboxamide, 1-(5-fluoropentyl)-n-1-naphthalenyl-	[M+H]+			Organoheterocyclic compounds	Indoles and derivatives	Indolecarboxylic acids and derivatives	219.675	12	6	2	4	10791	11016	17145.1	24357	12536.5	11003.2	12672.7	32718.1	12241.1	66201.3	31975.1	8524.88	16559.7	14432.8	37739.5	23717.8	9585.75	19289.6	19879	19280.8	0.0175981	0.0175981
M247T40	247.173	40.229	4.80305	1h-indole-3-ethanamine, 5-methoxy-n-methyl-n-(1-methylethyl)-	[M+H]+			Organoheterocyclic compounds	Indoles and derivatives	Tryptamines and derivatives	46.142	16	10	1	5	72855	127283	174978	152279	356032	109073	267500	242199	149777	145632	736239	241572	237669	119462	121305	312022	183914	192932	217590	193104	0.0705088	0.0705088
M474T287	474.197	286.844	9.35112	1h-indole-5-carboxylic acid, 1-[2-hydroxy-3-(4-phenoxyphenoxy)propyl]-3-(2-methyl-1-oxopropyl)-	[M+H]+			Benzenoids	Benzene and substituted derivatives	Diphenylethers	291.372	14	6	2	6	9110	6315.96	4637.65	7139.63	10859.3	12216.1	6091.72	3181.44	17823.5	10618.9	10683.7	12858.1	27625	9147.02	13703.5	21574.4	7707.79	4052.02	11524.8	11717.4	0.480439	0.480439
M136T90	136.043	90.099	7.19967	1-hydroxybenzotriazole	[M+H]+						91.33	21	9	3	9	295511	28240.6	22400.4	52271.9	23538.1	1.79806e+06	26146.6	11649	19025.3	45049.8	20655.4	10038.2	8167.65	49543.9	12816.3	27946.8	9828.1	108563	108512	108414	0.000699346	0.000699346
M413T36_1	413.317	36.327	7.19998	1-hydroxy vitamin d2	[M+H]+		C08211	Lipids and lipid-like molecules	Steroids and steroid derivatives	Vitamin D and derivatives	39.001	18	9	1	8	27155	229412	111337	136256	156986	68297.5	53113.7	211650	69416.6	79743.7	175427	74459.6	123964	88346	56312	109109	71401.5	117865	117847	121640	0.018341	0.018341
M282T133	282.128	132.943	6.56952	1-methyladenosine	[M+H]+	HMDB0003331	C02494				135.299	17	8	2	7	23999	33793.3	58055.6	100297	34867.5	16196.6	53813.5	36276	25054.5	48798.1	31435.4	25110.9	48255.1	79085.6	33721.2	46264.8	27891.2	53300.6	53280.1	51618.6	0.0183036	0.0183036
M170T316	170.087	316.108	1.32271	1-methylhistidine	[M+H]+	HMDB0000001	C01152	Organic acids and derivatives	Carboxylic acids and derivatives	Amino acids, peptides, and analogues	328.216	15	7	3	5	4050	7001.46	11204.9	12806	7063.07	6148.58	8541.19	5802.26	5826.85	14131	7790.37	6967.78	11540.2	15171	5766.78	5549.19	10402	8737.7	9671.08	9430.59	0.0522234	0.0522234
M355T34_1	355.297	33.722	1.88496	1-monolinoleoyl-rac-glycerol	[M+H]+			Lipids and lipid-like molecules	Fatty Acyls	Lineolic acids and derivatives	34.375	16	7	2	7	135668	133691	151323	82270.1	163637	171629	116457	134010	208180	94445.4	106478	107584	295743	101221	118839	90824.2	68139.3	172839	158590	156192	0.0553645	0.0553645
M426T202_1	426.272	202.324	1.66989	1-myristoyl-2-hydroxy-sn-glycero-3-phosphoethanolamine	[M+H]+	HMDB0011500		Lipids and lipid-like molecules	Glycerophospholipids	Glycerophosphoethanolamines	203.401	14	9	1	4	1055551	304647	425545	201550	442952	96563	601143	1.99922e+06	245164	360869	1.34403e+06	315994	627223	484441	621019	2.13003e+06	328497	602734	602492	580401	0.0215465	0.0215465
M811T138_1	810.614	137.731	5.20187	1-octadecanoyl-2-octadecenoyl-sn-glycero-3-phosphocholine	[M+Na]+			Lipids and lipid-like molecules	Glycerophospholipids	Glycerophosphocholines	139.259	14	7	0	3	14888	27724	22505.4	52484.4	35957.7	29271.2	5160.69	50742	63684.1	8715.75	51262.5	14793.7	51617.9	38119.3	14491.7	92659.8	11244.1	48566.7	54648.8	54737.5	0.0671856	0.0671856
M578T331_1	578.31	331.295	1.31298	1-o-hexadecyl-2-deoxy-2-thio-s-acetyl-sn-glyceryl-3-phosphorylcholine	[M+K]+			Organic nitrogen compounds	Organonitrogen compounds	Quaternary ammonium salts	332.216	11	5	1	5	6632	6661.85	9386.31	6153.18	7693.77	20159	10162.1	9850.51	6317.55	12246.1	6054.77	10126.1	7592.25	5467.64	6217.21	8584.9	7219.24	8356.93	8347.45	8356.95	0.000655934	0.000655933
M733T143_2	732.576	143.037	8.77849	1-oleoyl-2-myristoyl-sn-glycero-3-phosphocholine	[M+H]+	HMDB0008097		Lipids and lipid-like molecules	Glycerophospholipids	Glycerophosphocholines	152.783	17	5	1	6	40583	28065.1	84170.7	119376	112781	94270	32555.2	94969.1	7016.46	20951.7	118708	62232.9	117273	81949.1	41124.4	92984	28896.5	135112	142250	135194	0.0297959	0.0297959
M339T154_2	339.3	153.539	8.59765	1-oleoyl-2-palmitoyl-rac-glycerol	[M+H-C16H32O2]+			Lipids and lipid-like molecules	Glycerolipids	Diradylglycerols	154.825	20	10	1	9	602741	1.18566e+06	1.37553e+06	316846	391782	675479	650005	1.08086e+06	1.88605e+06	923810	937904	2.88194e+06	1.01654e+06	768737	1.13819e+06	1.47937e+06	952888	1.06994e+06	1.0699e+06	1.10412e+06	0.0182581	0.0182581
M419T154_1	419.266	153.516	7.95559	1-oleoyl-l-.alpha.-lysophosphatidic acid	[M+H-H2O]+			Lipids and lipid-like molecules	Glycerophospholipids	Glycerophosphates	154.888	15	10	1	4	11239	35424.9	43265.4	28818.4	38874.8	20990.5	20743	36386.3	46582.1	43416.8	23529.1	50054.6	30196.1	16729.6	21085.8	28527.8	27282.4	32711.1	31380.7	32669.9	0.0234544	0.0234544
M522T188	522.374	188.214	9.34899	1-oleoyl-sn-glycero-3-phosphocholine	[M+H]+	HMDB0002815		Lipids and lipid-like molecules	Glycerophospholipids	Glycerophosphocholines	189.122	15	6	2	7	656521	133984	296480	155349	232022	359370	76894.1	1.37281e+06	1.12483e+06	116829	982512	451125	425333	268978	230479	1.48643e+06	114390	529841	529736	507539	0.0245914	0.0245914
M480T195_1	480.322	195.197	2.80448	1-oleoyl-sn-glycero-3-phosphoethanolamine	[M+H]+	HMDB0011506		Lipids and lipid-like molecules	Glycerophospholipids	Glycerophosphoethanolamines	196.292	15	7	1	7	711839	538635	1.56045e+06	260314	380530	136907	471972	1.10638e+06	1.16869e+06	660310	1.10219e+06	457213	547653	410591	506933	1.52624e+06	300943	667140	667054	647741	0.0169153	0.0169153
M510T191_1	510.406	191.277	9.11189	1-o-octadecyl-sn-glyceryl-3-phosphorylcholine	[M+H]+	HMDB0011149		Lipids and lipid-like molecules	Glycerophospholipids	Glycerophosphocholines	192.382	15	7	1	7	665595	168872	382982	19460.8	50047.7	142055	18568.9	28969.2	626767	197896	161122	99074.6	221967	156677	54948.9	1.79304e+06	40576.6	278460	270992	278400	0.0155627	0.0155627
M796T250_2	795.519	250.189	7.74875	1-palmitoyl-2-docosahexaenoyl-sn-glycero-3-phospho-(1'-rac-glycerol)	[M+H]+			Lipids and lipid-like molecules	Glycerophospholipids	Glycerophosphoglycerols	250.418	11	5	1	5	43382	930.753	16164.7	3315.36	20238.2	25940.8	78550.1	86447.3	70679.4	22390.6	7826.27	35821.8	58525.4	19322.5	96726.4	8107.1	34759.1	31594.7	31909.6	31156.7	0.011984	0.011984
M807T138	806.58	138.48	7.02494	1-palmitoyl-2-docosahexaenoyl-sn-glycero-3-phosphocholine	[M+H]+	HMDB0007991		Lipids and lipid-like molecules	Glycerophospholipids	Glycerophosphocholines	164.162	17	8	0	2	27539	37674.7	33755.8	59230.1	64637	56367.4	8417.06	92956	102179	14348.1	64230.6	22965	56206.8	37416.9	25054.1	108151	16078.2	78126.3	77951.6	78753.2	0.00538487	0.00538487
M454T198_2	454.305	197.758	9.79417	1-palmitoyl-2-hydroxy-sn-glycero-3-phosphoethanolamine	[M+H]+	HMDB0011503		Lipids and lipid-like molecules	Glycerophospholipids	Glycerophosphoethanolamines	198.862	15	9	1	5	3914034	3.66193e+06	8.74107e+06	1.32955e+06	3.66639e+06	1.05461e+06	6.16524e+06	6.82821e+06	6.47198e+06	3.89902e+06	6.07553e+06	3.45049e+06	4.28711e+06	3.97366e+06	3.36554e+06	8.67058e+06	3.40403e+06	4.60824e+06	4.60446e+06	4.35901e+06	0.0315691	0.0315691
M679T147_1	678.519	146.67	8.70252	1-palmitoyl-2-lauroyl-sn-glycero-3-phosphorylcholine	[M+H]+			Lipids and lipid-like molecules	Glycerophospholipids	Glycerophosphocholines	147.758	10	8	0	2	54877	100495	139200	217272	320143	31915.9	59057.3	133959	46020.2	38790.8	152794	179737	137765	147433	239453	30684.4	61345.8	144645	147640	144656	0.0118514	0.0118514
M616T31_1	615.51	31.131	9.32604	1-palmitoyl-2-linoleoyl-rac-glycerol	[M+Na]+			Lipids and lipid-like molecules	Fatty Acyls	Lineolic acids and derivatives	31.789	14	9	1	4	419646	160437	158005	254267	3274.71	167968	175936	119627	45236.8	123975	291623	23357.7	404988	460646	58401.2	259292	52988.6	265589	257306	257284	0.0184128	0.0184128
M707T145_1	706.559	145.045	8.11855	1-palmitoyl-2-myristoyl-sn-glycero-3-phosphocholine	[M+H]+	HMDB0007965		Lipids and lipid-like molecules	Glycerophospholipids	Glycerophosphocholines	146.956	15	5	1	6	68685	84584.7	150056	275069	366358	70163.7	32731	109348	14459	26988.1	332945	163508	57639.2	251219	113940	60883.5	69082.1	185279	194096	185455	0.0267731	0.0267731
M602T31	601.539	31.13	3.75394	1-palmitoyl-2-oleoyl-3-linoleoyl-rac-glycerol	[M+H-C16H32O2]+			Lipids and lipid-like molecules	Glycerolipids	Triradylcglycerols	36.335	11	5	1	5	125749	229462	242953	158135	120976	135330	109282	81515.1	72210.5	145422	64867.6	54618.4	192037	237149	146874	165814	167734	234414	207782	234314	0.0680563	0.0680563
M618T31_1	617.525	31.1075	8.81553	1-palmitoyl-2-oleoyl-sn-glycerol	[M+Na]+	HMDB0007102		Lipids and lipid-like molecules	Glycerolipids	Diradylglycerols	31.789	10	8	0	2	470153	248591	247801	210665	448224	361344	291617	165957	30128.5	247081	225295	135047	285965	432492	75533	346861	71997.3	286600	290827	286460	0.0086184	0.0086184
M313T36	313.282	35.6505	0.207886	1-palmitoylglycerol	[M+H-H2O]+			Lipids and lipid-like molecules	Glycerolipids	Monoradylglycerols	36.982	18	10	1	7	2160906	1.85184e+06	2.49213e+06	1.47e+06	2.21004e+06	1.05557e+06	1.69775e+06	3.28773e+06	1.92083e+06	1.14487e+06	2.33821e+06	4.808e+06	2.50099e+06	1.94835e+06	2.58291e+06	1.89959e+06	3.36722e+06	2.24727e+06	2.33794e+06	2.24805e+06	0.0228858	0.0228858
M496T191_2	496.357	190.75	8.29838	1-palmitoyl-sn-glycero-3-phosphocholine	[M+H]+	HMDB0010382		Lipids and lipid-like molecules	Glycerophospholipids	Glycerophosphocholines	191.722	13	6	1	6	4877714	729316	1.50229e+06	846403	1.52547e+06	1.46227e+06	295605	5.2883e+06	13976.5	1.52873e+06	5.48215e+06	5.32745e+06	727649	486789	1.99523e+06	1.16974e+07	513704	2.65428e+06	2.72369e+06	2.62957e+06	0.0182804	0.0182804
M105T162	105.073	161.94	9.70156	1-phenylethanol	[M+H-H2O]+	HMDB0032619	C07112				162.663	22	10	3	9	197358	42532	100276	93471.6	78600.8	85630.1	166380	547939	29725.4	98906.8	149135	276548	807161	547930	448146	528506	177576	255161	257868	255199	0.00606074	0.00606074
M524T187_2	524.385	187.398	1.56422	1-stearoyl-2-hydroxy-sn-glycero-3-phosphocholine	[M+H]+	HMDB0010384	C04230	Lipids and lipid-like molecules	Glycerophospholipids	Glycerophosphocholines	188.472	15	8	1	5	2926625	416372	706965	486594	599183	504500	77184.5	1.65798e+06	1.90716e+06	305337	1.83984e+06	977700	1.31181e+06	866813	578131	6.94243e+06	164157	1.01707e+06	1.01586e+06	996972	0.0111592	0.0111592
M729T145	728.552	145.059	8.38276	1-stearoyl-2-oleoyl-sn-glycero-3-phosphoethanolamine	[M+H-H2O]+	HMDB0008993		Lipids and lipid-like molecules	Glycerophospholipids	Glycerophosphoethanolamines	146.084	10	3	0	7	11764	27713.8	18299.7	64574.8	61080.7	18766.5	4237.24	25650.6	41970.6	17531.5	77792.7	46068.4	40633.5	57821.2	44253	77087.8	20899	57222	58572	58571.4	0.0134074	0.0134074
M303T147	303.241	146.669	0.880072	20-hydroxyarachidonic acid	[M+H-H2O]+	HMDB0005998	C14748	Lipids and lipid-like molecules	Fatty Acyls	Fatty acids and conjugates	148.418	18	9	1	8	678309	36133.4	68922.7	82868.7	232802	77013	52172.6	4.55995e+06	70381.3	1.00535e+06	133861	33590.1	38884.4	227799	281453	32412.2	322594	383583	406810	413853	0.0394597	0.0394597
M96T380	96.0472	379.861	9.12497	2(1h)-pyridinone	[M+H]+	HMDB0013751	C02502	Organoheterocyclic compounds	Pyridines and derivatives	Hydropyridines	381.847	22	10	3	9	10586	12633.5	4756.94	37228.9	17858.9	4598.36	11455.7	22292.8	13352.1	6659.61	30206.8	15519.2	19559.9	24049.1	17257.5	16427.3	22007.2	15180	15400.3	15482.8	0.0101951	0.0101951
M441T36_3	441.382	35.681	1.75427	22-hydoxy-2-hopen-1-one	[M+H]+			Lipids and lipid-like molecules	Prenol lipids	Hopanoids	36.332	16	9	1	6	497275	287672	292133	155134	439890	927056	158049	460012	348961	119142	776283	183538	224546	213642	172937	218310	285269	363367	352934	363704	0.0170088	0.0170088
M212T421	212.099	420.776	3.72403	2',3'-dideoxycytidine	[M+H]+	HMDB0015078	C07207	Nucleosides, nucleotides, and analogues	Pyrimidine nucleosides	Pyrimidine 2',3'-dideoxyribonucleosides	432.563	19	8	3	8	11368	12917	7922.09	53676.7	22901.5	7016.7	10814.2	19352.8	10773.7	10334.6	35552.5	15804.9	22673	29359.8	22413.4	12529.5	23228.9	21130.6	21903.6	21130.5	0.0208671	0.0208671
M349T406_1	349.185	406.377	2.80367	2,3-dinor-8-isoprostaglandin-f2.alpha.	[M+Na]+		C14794	Lipids and lipid-like molecules	Fatty Acyls	Eicosanoids	413.204	16	8	1	6	5743	20196.9	9408.29	39951	18237.2	17098.9	22620.7	32448.8	32113.1	26862	68773.6	23800.9	29143.3	39884.2	21453.9	27888.3	38601.8	26626.8	24786.6	26632.5	0.0409021	0.0409021
M179T348	179.112	348.017	3.07931	2,5-dimethoxy-4-ethylamphetamine	[M+H-C2H7N]+			Benzenoids	Benzene and substituted derivatives	Phenethylamines	349.989	22	10	3	9	12545	5807.38	7863.15	26253.8	8113.27	5764.69	20604.3	8467.48	7454.24	18087.2	29029.5	9194.04	7542.97	18231	12642.5	5467.44	8912.16	6313.73	6699.89	6302.55	0.0351383	0.0351383
M367T27_1	367.344	26.76	1.95513	25-hydroxycholesterol	[M+H-2H2O]+		C15519	Lipids and lipid-like molecules	Steroids and steroid derivatives	Cholestane steroids	36.979	19	9	1	6	225273	39231.3	29221.9	46510.3	67536.3	62050	46836.5	179992	39818.8	42715.7	48217.4	61574	48921.6	99554	44227.7	52442.1	26649.4	46444.5	52596.7	46847	0.0707733	0.0707733
M594T214_1	594.378	214.123	0.811408	2-(5-oxovaleryl)phosphatidylcholine	[M+H]+			Lipids and lipid-like molecules	Glycerophospholipids	Glycerophosphocholines	214.871	12	8	1	3	5372	7718.05	10760.9	21955.2	27517	10137.7	10624.7	21954	14626.6	33293	29852.3	9459.64	21967.1	12088.2	26129.7	34777	10883.4	17141	17568.8	17139.8	0.0143106	0.0143106
M155T293_2	155.086	292.857	0.864765	2,6-dimethoxyphenol	[M+H]+	HMDB0034158	C10787	Benzenoids	Phenols	Methoxyphenols	294.652	22	10	3	9	325672	329684	297310	394031	305233	145350	204489	572815	237349	441272	692313	295264	242467	234115	464917	438166	331334	384782	390587	378725	0.0154193	0.0154193
M137T293_2	137.076	292.8	7.79005	2-acetyl-3-methylpyrazine	[M+H]+	HMDB0030001		Organic oxygen compounds	Organooxygen compounds	Carbonyl compounds	294.652	23	10	3	9	173997	194063	165669	219397	172423	102434	120230	320104	130749	243255	373288	171737	124843	125433	249503	248312	185272	218458	216210	216209	0.00598436	0.00598436
M120T259_2	120.085	259.252	5.36343	2-amino-1-phenylethanol	[M+H-H2O]+	HMDB0001065	C02735	Organic nitrogen compounds	Organonitrogen compounds	Amines	263.104	22	10	3	9	297508	486290	1.38941e+06	580608	666634	2.26487e+06	1.36222e+06	906844	1.37852e+06	1.44091e+06	573044	1.07171e+06	1.02648e+06	728352	919571	981613	449916	898515	918821	899094	0.0127668	0.0127668
M116T85	116.074	84.917	1.7681	2-aminoadipic acid	[M+H-CH2O2]+	HMDB0000510	C00956	Organic acids and derivatives	Carboxylic acids and derivatives	Amino acids, peptides, and analogues	86.09	19	9	3	6	35673	72854	79994.9	31288.4	49505.7	23321.1	200292	38111.7	33558.4	278158	22903.5	26729.9	48397.4	29551.3	29071.5	24694.6	45211.7	76032.8	76406.3	76408.9	0.00283667	0.00283667
M455T206_1	455.197	206.257	5.44389	2'-deoxycytidine	[2M+H]+	HMDB0000014	C00881	Nucleosides, nucleotides, and analogues	Pyrimidine nucleosides	Pyrimidine 2'-deoxyribonucleosides	207.01	14	9	1	4	69160	73647.3	132881	67235.4	22711	72024.2	121041	15309	103632	11995.3	195667	39090.6	43860.7	74986.1	19510.1	156622	45864.6	57507.5	57672.6	57673.1	0.00165684	0.00165684
M135T36	135.084	35.6735	9.13322	2'-Deoxy-D-ribose	[M+H]+		C01801	Organic oxygen compounds	Organooxygen compounds	Carbonyl compounds	36.305	22	10	3	9	81348	82970.6	103518	93179.1	91768.1	96448.8	63361.8	106248	124422	86203.1	138776	89159.3	136244	87998.3	83324.4	90028.9	106346	112917	114250	114810	0.0085307	0.0085307
M275T181	275.084	181.064	0.959034	2'-deoxyinosine	[M+Na]+	HMDB0000071	C05512	Nucleosides, nucleotides, and analogues	Purine nucleosides	Purine 2'-deoxyribonucleosides	183.975	22	10	3	9	235243	889242	1.10269e+06	1.99677e+06	878960	941274	974761	369421	949855	1.14981e+06	748279	712591	942975	916784	676384	577314	832284	867652	850644	867548	0.011358	0.011358
M194T38	194.123	38.2995	3.5603	2-despiperidyl-2-(5-carboxypentylamine)repaglinide	[M+H-C16H21NO4]+			Organic acids and derivatives	Carboxylic acids and derivatives	Amino acids, peptides, and analogues	38.994	22	10	3	9	145101	64473.8	33368.4	45430.1	37875.4	26276.7	37184.6	64308.8	171925	56136.7	43835.3	33404.1	34487.2	63077.3	39402.1	279503	42465.3	56210.2	58966.7	58928.1	0.027232	0.027232
M113T121	113.074	120.749	4.05134	(2e,4e)-hexa-2,4-dienoic acid	[M+H]+	HMDB0029581		Lipids and lipid-like molecules	Fatty Acyls	Fatty acids and conjugates	122.15	22	10	3	9	42888	24145.6	197510	16774.5	32904.9	114755	22719.4	21982.8	112898	18622.9	27752	23393.8	20202.9	23569.2	36119.7	17281.8	28040.1	42767	42561.7	42777.4	0.00284872	0.00284872
M493T375_1	493.16	375.428	5.07922	2'-fucosyllactose	[M+Na-H2O]+			Organic oxygen compounds	Organooxygen compounds	Carbohydrates and carbohydrate conjugates	376.822	15	6	1	8	8019	3850.05	4793.18	7204.07	23557.1	3899.54	12221.7	8929.61	7167.99	19032.1	5894.14	6567.04	6982.3	7837.04	6319.05	1806.75	6427	8226.52	8190.39	8226.63	0.00254305	0.00254305
M162T267	162.06	266.914	1.41251	2-heptyl-4-hydroxyquinoline n-oxide	[M+H-C7H14]+		C04284	Organoheterocyclic compounds	Quinolines and derivatives	4-hydroxy-2-alkylquinolines	281.763	19	8	3	7	81756	36819.3	79056.2	7722.55	60136	40190.8	116760	48236.7	28532.1	207138	3750.43	20604.1	33861.6	6336.52	41613.6	13930.8	40681	40237.1	40316.1	39564.1	0.0103214	0.0103214
M299T172	299.094	172.426	5.7513	2-hydroxy-3-(3-hydroxy-3-methylbutyl)naphthalene-1,4-dione	[M+K]+			Lipids and lipid-like molecules	Prenol lipids	Quinone and hydroquinone lipids	173.325	19	10	1	8	38614	43251.8	27760.3	19175.5	24145.4	8651.31	39023.9	19662.6	193260	19489.1	17374.1	57554.9	51675.5	15610	40428	59229	39258.7	38507.1	38485.9	39929.3	0.021227	0.021227
M448T445	448.207	445.122	7.81706	2-hydroxyatorvastatin lactone	[M+H-C6H7NO]+			Organoheterocyclic compounds	Pyrroles	Substituted pyrroles	447.612	18	5	2	7	3251	5691.92	10493.8	17040.6	9411.22	13242.8	12449.9	9713.13	7862.9	13487.7	23999.2	8987.67	11828	7494.2	14629.9	7604.85	7259.27	10367.8	10352.6	5791.71	0.298463	0.298463
M395T206	395.255	205.534	5.40402	2-hydroxyatrazine	[2M+H]+	HMDB0062766	C06552	Organoheterocyclic compounds	Triazines	1,3,5-triazines	213.373	13	5	3	5	828307	119475	12711.1	69206.1	371824	30080.7	26654	3.30003e+06	130269	698106	38374.3	20749.3	155779	82843.8	243657	53272.3	291191	423218	423305	428102	0.00657847	0.00657847
M289T392	289.187	392.173	5.24662	2-hydroxyestradiol	[M+H]+	HMDB0000338	C05301	Lipids and lipid-like molecules	Steroids and steroid derivatives	Estrane steroids	394.883	10	4	0	6	11443	11121	15094.4	72422	24967	67024.7	23407.7	15947.6	16926.4	83503	51740.4	22014.3	30034.1	27219.6	21678.6	25630.9	35765.1	28206.6	28601.5	28601.9	0.00801137	0.00801137
M177T59	177.07	59.398	8.84973	2-Isopropylmalic acid	[M+H]+	HMDB0000402	C02504	Lipids and lipid-like molecules	Fatty Acyls	Fatty acids and conjugates	64.484	14	6	2	6	17201	32645.8	35722.8	50999	101560	81788.3	108313	44709.2	57599.3	31123.8	63130	63202.1	75069.5	72066.8	93699.8	9462.08	130336	39824.1	30150	31783.3	0.152675	0.152675
M578T36_2	577.54	36.305	6.41408	2-lahma [dmed-fahfa]	[M+H]+						36.968	11	5	1	5	96807	293219	293372	131766	180982	78968.1	113311	220896	106171	142011	112566	107177	202354	196657	172788	153045	110209	140095	150059	150145	0.0393658	0.0393658
M592T71_1	591.55	70.918	9.71359	2-lahpda [dmed-fahfa]	[M+H]+						87.412	11	7	1	3	22565	85355	97939.7	71262.8	39140.8	26864.5	15133.4	75592	32242.2	56937.7	38848.6	57561	212109	66496.4	147593	16751.8	56233.6	86546.9	93650.2	86598.5	0.0459482	0.0459482
M576T71_1	575.521	70.918	3.68979	2-linoleoyl-1-palmitoyl-sn-glycero-3-phosphoethanolamine	[M+H-C2H8NO4P]+	HMDB0008928		Lipids and lipid-like molecules	Glycerophospholipids	Glycerophosphoethanolamines	72.431	11	5	1	5	16097	97991.8	77910.5	120895	78950.7	23315.9	14439.8	55750.3	17721.1	65289.1	87593.9	32540.5	147734	122363	112625	49852.9	31486	68385	68377.3	65039	0.0286855	0.0286855
M337T31_1	337.284	31.186	7.3851	2-linoleoylglycerol	[M+H-H2O]+	HMDB0011538		Lipids and lipid-like molecules	Fatty Acyls	Lineolic acids and derivatives	35.675	19	10	1	8	1337330	707492	711091	617691	1.29101e+06	962747	757918	373922	320408	737814	886409	308607	1.21311e+06	1.41306e+06	346522	1.26515e+06	192428	764576	761241	750863	0.00942385	0.00942385
M139T46	139.09	45.774	0.697812	2-methoxy-5-methylphenol	[M+H]+			Benzenoids	Phenols	Methoxyphenols	61.333	22	9	3	9	28524	36729.1	27548.9	93058.2	44624	74577.8	43724.4	95946.6	33725.9	80098.9	205380	10070.9	43535	72201.2	60587	42238.6	41228.9	59476.2	59844.2	60872.6	0.0120496	0.0120496
M285T395_1	285.188	395.027	4.18805	2-methoxyestradiol	[M+H-H2O]+	HMDB0000405	C05302	Lipids and lipid-like molecules	Steroids and steroid derivatives	Estrane steroids	405.267	19	10	1	7	14639	17438.2	2097.6	48104.1	22568.9	2645.78	25996.4	27864.6	10266.7	2605.17	31665.2	15850.4	21472.7	34445.9	13993.8	14517.8	34923.8	23778.8	22137.5	23689.8	0.0397804	0.0397804
M523T36_1	523.485	36.305	5.74609	2-mohma [dmed-fahfa]	[M+H]+						39.001	13	7	1	5	201292	218555	176483	438864	326748	34258.8	103458	151319	61189	88817.2	239675	94074.1	279188	274233	222258	246033	162554	202058	203594	203613	0.00439472	0.00439472
M552T75	551.52	74.613	9.50047	2-mohpa [dmed-fahfa]	[M+H]+						75.711	13	5	1	7	25696	30257.1	46639.5	168172	90573.2	17561.6	8234.91	34729.1	5561.26	16833.4	60577.4	12754.3	84238.4	108888	44415.2	32195.8	23042.3	50682.8	50676.2	50357.8	0.00367242	0.00367242
M538T36_1	537.502	36.324	9.94103	2-mohpda [dmed-fahfa]	[M+H]+						37.642	11	5	1	5	190894	224234	253510	334819	420427	55690.7	201438	153346	90514.6	120526	218830	143127	294639	262860	188921	178794	126293	216502	212333	215092	0.00988014	0.00988014
M463T55	463.193	55.348	9.33409	2-naphthalenecarboxamide, n-[(1s)-2-[4-(5-chloro-2,3-dihydro-2-oxo-1h-benzimidazol-1-yl)-1-piperidinyl]-1-methylethyl]-	[M+H]+			Benzenoids	Naphthalenes	Naphthalenecarboxylic acids and derivatives	56.063	13	8	1	4	34238	79803.2	39097.8	39562.8	197548	53717.3	36113	69911.2	26696.5	48897.3	43431.4	45625.6	42012.1	20930.2	54092	10542.3	102721	80226	74125.1	80266.6	0.0451902	0.0451902
M277T375	277.139	374.814	7.59397	2-naphthalenol, 1-[(2,4-dimethylphenyl)azo]-	[M+H]+		C19526	Benzenoids	Naphthalenes	Naphthols and derivatives	376.098	15	5	3	7	4084	18038.7	18969.9	17082.3	15418.7	7045.74	18655.8	6321.07	16365.2	24478.1	12692	13441.1	10547.6	15570.2	10271.7	11026.4	17293.8	8022.61	8002.17	9137.69	0.077469	0.077469
M282T104	282.129	104.27	1.95791	2'-o-methyladenosine	[M+H]+	HMDB0004326	C04779				105.966	17	9	2	6	11074	27972.6	20925.1	27506.6	59419.3	27449.3	11865.9	41187	31145.5	26473.9	29368.7	74063.4	24853.3	22970.4	21581.7	21416.8	53262.2	38591.5	34343.9	34343.7	0.0685795	0.0685795
M258T165_1	258.124	164.714	9.43209	2'-o-methylcytidine	[M+H]+						166.437	14	5	3	5	53075	34604.6	12257.6	5793.67	13628.3	27261.4	12264.8	133568	8054.13	27796.6	35557.1	13862.3	84320	81078.1	15457.3	252538	18465.1	8704.76	13737.2	13722.7	0.240676	0.240676
M313T67	313.281	66.644	9.57574	2-palmitoyl-rac-glycerol	[M+H-H2O]+	HMDB0011533		Lipids and lipid-like molecules	Glycerolipids	Monoradylglycerols	71.843	17	9	0	7	153521	583430	814399	903553	970537	128319	291696	749353	199357	380374	1.19376e+06	375619	728210	874784	558226	454735	358753	664377	650660	650799	0.0120251	0.0120251
M100T55_2	100.079	55.44	9.13556	2-piperidone	[M+H]+	HMDB0011749	C10482	Organoheterocyclic compounds	Piperidines	Piperidinones	56.084	23	10	3	9	2081174	2.63933e+06	9.51323e+06	935777	543868	1.63837e+06	6.51331e+06	7.7894e+06	5.57122e+06	5.75583e+06	574069	5.1798e+06	2.95874e+06	3.19342e+06	7.40087e+06	2.19552e+06	2.90702e+06	3.81918e+06	3.90042e+06	3.90119e+06	0.0121663	0.0121663
M354T404_1	354.211	404.269	8.14991	2-pyrrolidinone, 5-[(1e,3r)-4,4-difluoro-3-hydroxy-4-phenyl-1-buten-1-yl]-1-[6-(2h-tetrazol-5-yl)hexyl]-, (5r)-	[M+H-H3FN2O]+						405.822	12	7	1	4	12807	24832.8	20554.6	69468.7	38757.5	15960.9	29796.6	30289.8	19391.7	32703.5	44631.7	25918.5	34365	49916	23944.6	15819.8	52282.1	30797.7	30403.5	30795.2	0.00739701	0.00739701
M523T28_1	523.319	27.85	4.8538	(2r)-3-hydroxyisovaleroylcarnitine	[2M+H]+			Lipids and lipid-like molecules	Fatty Acyls	Fatty acid esters	32.43	13	8	0	5	23985	59144.8	81841.5	22923.6	38931.8	15772.2	42365.8	53242.5	28504.8	29069.3	48307.1	16796.1	53089.9	51007.9	24371.7	43138.1	54666.4	70135.9	71220.4	70162.1	0.00877498	0.00877498
M439T429_1	439.154	428.754	5.16388	(2r,3s,4s,5r,6r)-5-[(2s,3r,4r)-3,4-dihydroxy-4-(hydroxymethyl)oxolan-2-yl]oxy-2-(hydroxymethyl)-6-(2-phenylethoxy)oxane-3,4-diol	[M+Na]+			Organic oxygen compounds	Organooxygen compounds	Carbohydrates and carbohydrate conjugates	431.328	13	8	1	4	4550	7787.64	12447.6	17194.5	12078	14527.5	14997.8	12217.1	20894.3	6983.67	16433.3	5596.7	4261.31	11301.6	9100.7	15640	10901.7	14061.2	13463.7	14062.3	0.0249085	0.0249085
M689T305_1	689.238	305.364	0.0412059	[(2r,3s,4s,5r,6r)-6-[1,7-bis(4-hydroxyphenyl)-5-oxoheptan-3-yl]oxy-3,4,5-trihydroxyoxan-2-yl]methyl (e)-3-(3,4-dimethoxyphenyl)prop-2-enoate	[M+Na]+			Phenylpropanoids and polyketides	Diarylheptanoids	Linear diarylheptanoids	306.556	12	7	0	5	1507	788.509	778.491	1731.16	803.691	1299.24	1486.75	892.544	1402.49	2072.95	1428.11	919.46	1373.08	1782.04	835.616	2144.91	1179.19	468.508	551.543	395.32	0.165674	0.165674
M513T414_1	513.134	413.995	3.7618	3',4',6-trimethoxyisoflavone-7-o-.beta.-d-glucopyranoside	[M+Na]+			Phenylpropanoids and polyketides	Isoflavonoids	Isoflavonoid O-glycosides	415.123	12	7	1	4	12096	5609.56	3229.42	2762.49	3908.98	9423.89	1772.73	4332.7	12819.6	3300.52	3830.25	8078.08	3438.27	2228.59	3312.47	29471.8	5244.37	2313.84	2970.93	2353.56	0.144707	0.144707
M152T78	152.075	78.159	5.31846	3,4-dihydroxy-l-phenylalanine	[M+H-CH2O2]+	HMDB0000181	C00355	Organic acids and derivatives	Carboxylic acids and derivatives	Amino acids, peptides, and analogues	87.4	13	6	0	7	5460	42781.3	57556.5	52181.6	30875	39058.9	55502	53385.5	70370.3	29564.5	50787	40805.8	42335	56374.3	60880.2	37003.3	41278.4	48657.5	49835.6	48668.6	0.0138008	0.0138008
M269T244	269.183	244.472	0.426166	3-[4-methyl-1-(2-methylpropanoyl)-3-oxocyclohexyl]butanoic acid	[M+H]+			Lipids and lipid-like molecules	Prenol lipids	Monoterpenoids	246.258	17	7	2	8	77677	11308.5	141559	10873.1	29385.5	87176.3	42356.7	12016.4	27765.1	240216	11378.8	10043.1	8557.71	10518.1	11798.5	9091.2	10559.7	37689.6	38880.7	37680.8	0.0181247	0.0181247
M347T344	347.101	344.324	9.45412	3',5'-dimethoxy-3,5,7,4'-tetrahydroxyflavone	[M+H]+		C11620	Phenylpropanoids and polyketides	Flavonoids	Flavones	351.485	15	9	1	2	4588	11078.6	15889.8	18923.8	16117.6	22781.4	21201.1	16893.7	12841.9	10086.2	9134.2	10328.5	11212.4	9364.95	23279.5	10669.3	14436.7	11252.5	12991.6	12933.4	0.0797018	0.0797018
M138T312	138.059	312.078	2.83236	3-acetoxypyridine	[M+H]+						313.39	21	9	3	9	9235	15327.9	24116.6	14318.4	20283.9	28420.7	16571	13787.1	23152.6	24475.2	13216.6	8705.86	16943.2	15701.6	14059.6	7702.79	16434.9	12975.3	13199.2	12971.6	0.00999054	0.00999054
M104T46	104.073	45.8925	9.63396	3-aminobutanoic acid	[M+H]+	HMDB0031654		Organic acids and derivatives	Carboxylic acids and derivatives	Amino acids, peptides, and analogues	48.809	22	10	3	9	75300	75706.8	72727.6	20372.1	66143.4	100889	82698.7	98309.2	286221	159527	39872.2	274727	128268	32787.2	197358	53728.8	256226	112584	107801	107803	0.0252365	0.0252365
M140T398	140.038	397.908	1.40198	3-aminopyrazine-2-carboxylic acid	[M+H]+			Organoheterocyclic compounds	Diazines	Pyrazines	400.257	22	10	3	9	68048	52642.3	76913.6	3582.93	84709.7	40191.4	142494	84884.8	20316.6	150779	1653.42	10745.2	9739	2981.59	3724.08	7393	4785.39	41616.2	40252.9	40255	0.0193214	0.0193214
M393T167_1	393.367	167.102	1.05513	(3.beta.,5.alpha.)-4,4-dimethylcholesta-8,14,24-trien-3-ol	[M+H-H2O]+	HMDB0001023	C11455	Lipids and lipid-like molecules	Steroids and steroid derivatives	Cholestane steroids	167.757	15	9	1	5	20212	7194.01	15823.3	17507	10112.5	3158.49	6817.04	31276.8	9946.21	17953.9	62603.3	7178.23	25295.5	18362.3	33916.1	6596.7	27288	22108.2	19362.6	19336.2	0.0785869	0.0785869
M399T99	399.337	99.028	6.06142	3.beta.-hydroxy-5-cholestenoic acid	[M+H-H2O]+		C17333	Lipids and lipid-like molecules	Steroids and steroid derivatives	Bile acids, alcohols and derivatives	100.648	15	8	1	6	57661	133864	506815	102056	164027	99363.1	57920.7	411281	376381	293654	254427	68496.1	411255	154353	112447	239257	55948	167986	170950	168365	0.00953978	0.00953978
M493T159_1	493.268	159.357	8.81144	3beta-hydroxydeoxodihydrodeoxygedunin	[M+Na]+						160.675	14	7	1	6	146827	148868	483427	178584	122407	65735.1	230725	578038	626694	238119	542122	367533	611574	281281	286706	576982	512188	452441	407251	452738	0.0598348	0.0598348
M473T226	473.25	225.964	2.71805	3.beta.-tetrahydrocortisol, 3,21-diacetate	[M+Na]+			Lipids and lipid-like molecules	Steroids and steroid derivatives	Steroid esters	227.043	14	9	1	4	22257	135416	59511.3	71019	117836	18919.4	27051.3	79984.7	121128	54603.5	96552.6	107816	79472	87461	88700.4	146479	46279.6	87226.4	95677	87287.9	0.053976	0.053976
M448T321_1	448.319	321.114	5.23957	3-[(cholamidopropyl)dimethylammonio]-1-propanesulfonate	[M+H-C5H13SO3N]+		C11321	Lipids and lipid-like molecules	Steroids and steroid derivatives	Bile acids, alcohols and derivatives	322.259	14	7	1	6	8184	14304.2	16904.7	25987.3	13785.2	33839.1	22720.9	21117.4	15565.4	22071.6	26896.4	15077.2	22177.1	19487.1	19547.9	9134.78	15756.3	19384.4	19853.2	19854.5	0.0137596	0.0137596
M499T229_1	499.268	228.865	5.2688	(3e,5s,7r,8r,11e,13s,15r,16r)-3,5,7,11,13,15-hexamethyl-8,16-bis(1,3-oxazol-5-ylmethyl)-1,9-dioxacyclohexadeca-3,11-diene-2,10-dione	[M+H]+						229.806	11	6	1	4	3669	8767.31	11790.2	24490.1	12790.8	26631.9	13461.6	20333.6	10050	26574.3	34852.5	10321.4	16726.3	11978.7	15723.3	18559.4	9807.12	13619.7	13575.2	13619.9	0.00189297	0.00189297
M331T45_1	331.132	45.376	5.51025	3-heptanone, 7-(3,4-dihydroxyphenyl)-5-hydroxy-1-(4-hydroxyphenyl)-	[M+H]+			Phenylpropanoids and polyketides	Diarylheptanoids	Linear diarylheptanoids	57.431	18	5	3	7	13119	15046.2	78318.3	33703.4	25016.1	91689.5	59949	79424.6	49328.3	37670.4	78574.1	35691.1	46246.2	41526.1	33974.7	24129.4	20487.7	54287	54278.6	52180.5	0.0226521	0.0226521
M87T372	87.0466	371.653	2.73848	3-hydroxybutyric acid	[M+H-H2O]+	HMDB0000357	C01089	Organic acids and derivatives	Hydroxy acids and derivatives	Beta hydroxy acids and derivatives	372.314	22	10	3	9	20663	64674.4	34716.1	53462.7	95503.1	38420.4	70947.1	101622	65893.5	59808.5	103174	46470.1	48469.4	55090.8	43510.4	81330.7	77888.9	64845.8	65517.5	65518.7	0.00594512	0.00594512
M495T230_2	495.308	230.088	9.41902	3-hydroxybutyrylcarnitine	[2M+H]+	HMDB0062735		Lipids and lipid-like molecules	Fatty Acyls	Fatty acid esters	230.7	16	9	1	5	3141411	277959	27467.9	76766.3	270957	2.04914e+07	135551	104603	173548	218510	79251.9	129599	121301	107329	96233.6	16976.8	175033	1.49209e+06	1.46832e+06	1.49204e+06	0.00923703	0.00923703
M543T155_1	543.278	154.965	0.41662	3-hydroxystanozolol glucuronide	[M+Na]+			Lipids and lipid-like molecules	Steroids and steroid derivatives	Steroidal glycosides	170.854	12	8	1	2	5604	14160.8	26630.6	24002.6	35544.6	16886.1	22924	25840.5	30550.1	32837.5	23360	23723.8	18577.3	22618.5	18647.8	24763.7	25246.5	23688.5	22282.3	23684.2	0.0349144	0.0349144
M213T77	213.069	76.722	9.07493	3-hydroxyxanthone	[M+H]+			Organoheterocyclic compounds	Benzopyrans	1-benzopyrans	79.313	15	8	2	5	9057	16411.1	14387.9	28774.3	16593.4	11948.3	14214.9	35689	57670.6	16841	47619.3	53638.9	29309.2	45019.8	46505.1	8932.77	69081.2	25475.1	25841.9	26015.4	0.0107003	0.0107003
M339T43	339.275	43.1955	1.85717	3-ketopetromyzonol	[M+H-3H2O]+			Lipids and lipid-like molecules	Steroids and steroid derivatives	Bile acids, alcohols and derivatives	59.217	16	8	0	6	155877	98769.9	405545	102001	73384	47610.5	290367	537848	190702	211349	57181.1	339983	203685	87730.7	28057.7	58651.9	78835.9	349100	357411	349092	0.013643	0.013643
M69T275	69.0721	274.973	5.81982	3-methyl-2-buten-1-ol	[M+H-H2O]+	HMDB0030124	C01390	Organic oxygen compounds	Organooxygen compounds	Alcohols and polyols	291.648	26	10	3	9	5950	8228.84	18836.8	10442.3	10907.4	28709.7	23984.9	16258.7	23944.1	23460.5	11534.2	18981.4	17519.1	11703.9	16452.5	16553.4	9773.08	12885.6	13127.2	12887.7	0.0107098	0.0107098
M150T130	150.082	129.987	7.96462	3-methyladenine	[M+H]+	HMDB0011600	C00913	Organoheterocyclic compounds	Imidazopyrimidines	Purines and purine derivatives	131.328	22	10	3	9	72564	280643	309346	866306	476682	364263	326705	369697	222808	405966	518611	306942	353014	541666	252542	432882	358709	354640	353018	354839	0.00282034	0.00282034
M105T36	105.073	36.332	9.52066	3-methylbenzyl alcohol	[M+H-H2O]+		C07216	Benzenoids	Benzene and substituted derivatives	Benzyl alcohols	37.005	22	10	3	9	453847	531120	661385	657372	528544	667099	432621	602433	517608	583557	643854	573726	642762	574676	523915	760908	593240	644795	640031	644799	0.00427804	0.00427804
M126T383	126.094	382.835	8.31583	3-methylhistamine	[M+H]+	HMDB0001861		Organic nitrogen compounds	Organonitrogen compounds	Amines	393.844	21	10	3	7	4366	12247.4	3789.09	12831.4	8747.07	7519.42	6463.79	14513.8	18259.2	7013.12	19754	17688.2	17133.1	12231.1	11342.2	8414.37	12215.6	11415.6	11814.5	11429	0.0196089	0.0196089
M109T293	109.079	292.8	3.09267	3-methyl-l-histidine	[M+H-CH3O2N]+	HMDB0000479	C01152	Organic acids and derivatives	Carboxylic acids and derivatives	Amino acids, peptides, and analogues	294.652	21	10	3	8	15177	16717.9	14707.6	19589.4	17184.8	5918.79	10529.4	29247.2	13751.5	20460.2	32964.9	14351.6	11103.4	11772.1	20755.7	21995.8	15767.2	19313.9	19590.2	19594.2	0.00824102	0.00824102
M511T447	511.259	447.01	0.328488	3-quinolinecarboxamide, 6-(2-furanyl)-1,4-dihydro-8-methoxy-4-oxo-1-pentyl-n-tricyclo[3.3.1.1(3,7)]dec-1-yl-	[M+Na]+			Organoheterocyclic compounds	Quinolines and derivatives	Quinoline carboxamides	450.477	11	7	1	3	4653	6032.65	11328.9	13749.8	10662.5	19485.3	14330.4	8344.26	8158.24	17639.8	17519.2	8974.48	12668.3	12782.5	10643.3	8923.1	6144.71	10747.6	11056.9	10742.9	0.0165871	0.0165871
M571T162	571.343	161.961	5.59379	(3r,5r,6r,7s,9s,10r,13r,17r)-17-((r)-5-methoxy-5-oxopentan-2-yl)-10,13-dimethylhexadecahydro-1h-cyclopenta[a]phenanthrene-3,6,7-triyl triacetate	[M+Na]+			Lipids and lipid-like molecules	Steroids and steroid derivatives	Bile acids, alcohols and derivatives	163.266	13	6	1	6	3980	9840.88	12304.5	17040.9	15890.4	8676.56	15803	15670.1	17087.1	20611.1	24106.3	6556.3	19312.9	20802	13584.4	14534.2	10066.8	17830.1	19757.4	18007	0.0574884	0.0574884
M475T161_2	475.336	160.636	8.63545	(3r,7r,9s,10s,12s,13r,14s,17r)-17-((2r)-6,7-dihydroxy-6-methylheptan-2-yl)-10,13-dimethylhexadecahydro-1h-cyclopenta[a]phenanthrene-3,7,12-triol	[M+Na]+	HMDB0002180		Lipids and lipid-like molecules	Steroids and steroid derivatives	Bile acids, alcohols and derivatives	172.057	13	6	1	4	85651	15308.3	76743.4	6024.61	14764.8	62667.4	10977.7	100843	103834	22478	66711.3	13619.2	55063.3	8214.65	22566.2	166074	6820.24	71396.5	57905.1	75418.5	0.134429	0.134429
M159T71	159.096	71.21	5.69689	4-(1-piperazinyl)-1h-indole	[M+H-C2H5N]+			Organoheterocyclic compounds	Diazinanes	Piperazines	86.76	24	10	3	9	45989	146338	77908.7	261123	192742	34248.1	127821	308313	212599	151900	429568	367069	557265	818591	434165	236747	169629	230196	221363	221382	0.0227099	0.0227099
M395T165	395.383	165.363	0.118768	4,4-dimethylcholest-8(9),24-dien-3.beta.-ol	[M+H-H2O]+		C05108	Lipids and lipid-like molecules	Prenol lipids	Triterpenoids	165.899	13	7	2	4	28620	8661.73	21172	24288.1	26016.7	4127.64	13953.4	42285.2	15991.3	20008.6	88220	13718	21960.9	24687.7	36694.9	7647.22	23821.5	27262.2	27316	28992	0.0353058	0.0353058
M442T189	442.367	189.022	2.78296	4,4'-methylenebis(2,6-di-tert-butylphenol)	[M+NH4]+		C14287	Benzenoids	Benzene and substituted derivatives	Diphenylmethanes	190.082	12	5	1	6	12136	7553.01	5238.5	5259.46	5355.71	12455.3	3485.3	11125.6	5017.16	3837.46	6322.44	1405.23	9379.03	3583.96	3740.99	15849.2	2452.12	28937.3	28938.3	27575.9	0.027604	0.027604
M282T395	282.142	394.558	2.85884	4,7,8-trimethoxy-3,5-dimethylchromen-2-one	[M+NH4]+						398.657	20	9	2	7	6858	27356.3	13948.5	55711.1	43255.5	1719.61	17854.9	20929.4	20375.9	20567.1	52023.3	27396.3	42082.3	58212.8	16298.1	20001.6	54069.8	29056.6	31800.3	31687.5	0.0503276	0.0503276
M132T374_2	132.106	373.677	9.25821	4-amino-4-methylpentanoic acid	[M+H]+			Organic acids and derivatives	Carboxylic acids and derivatives	Amino acids, peptides, and analogues	380.568	22	10	3	9	149164	144662	66300.3	119745	360131	54770.2	497625	320936	115535	85418.7	44725.6	147889	98280.9	138692	90378.7	117675	163043	133785	136866	133923	0.0129054	0.0129054
M137T44	137.072	44.0635	5.33827	4-amino-n-(tert-butyl)benzamide	[M+H-C4H8]+			Benzenoids	Benzene and substituted derivatives	Benzoic acids and derivatives	45.509	18	8	3	7	18825	26317.1	65562.4	51073.4	43341.4	47866	41067.6	42061.5	54031.3	39470.2	42057.3	44778.3	60482.3	52837.2	33503.9	104192	28540.6	41907.4	41394.2	48698.1	0.0926554	0.0926554
M136T344_2	136.052	344.353	0.172583	4-aminosalicylic acid	[M+H-H2O]+	HMDB0014378	C02518	Benzenoids	Benzene and substituted derivatives	Benzoic acids and derivatives	345.07	22	10	3	9	67948	21604.8	31480.5	65437	46786.6	129714	7933.27	59405.8	44743.6	6446.88	25204	6514.57	19293.5	37794	10154.9	167380	5631	254754	254757	249308	0.0124329	0.0124329
M251T317	251.184	317.181	3.5808	4-androstene-11.beta.,17.beta.-diol-3-one	[M+H-3H2O]+	HMDB0060339	C18075	Lipids and lipid-like molecules	Steroids and steroid derivatives	Androstane steroids	331.04	23	10	3	9	21518	55921.7	24583.7	127676	72137.7	12103.8	25458.4	63408.7	52395.1	26114.9	97818.8	51744.1	59766.8	88162.1	78910.2	32534.1	81872.7	62330	62330.5	61149.7	0.0110045	0.0110045
M385T32_2	385.358	32.415	9.55563	4-cholestenone	[M+H]+	HMDB0000921	C00599	Lipids and lipid-like molecules	Steroids and steroid derivatives	Cholestane steroids	32.568	15	7	1	7	457997	369922	477263	315767	298175	101930	616633	481008	29840	414648	292150	154475	78425.4	563031	267207	453811	176573	322479	322474	314661	0.0141071	0.0141071
M236T412	236.157	411.633	2.98568	4-fluoro-.alpha.-pyrrolidinobutiophenone	[M+H]+			Organic oxygen compounds	Organooxygen compounds	Carbonyl compounds	413.099	20	8	3	9	21988	43242.8	11046.4	58954.2	39118.5	171497	11289.7	88639	64397.7	5538.62	96368.8	70275.6	37050.7	96752.2	82398.7	35699.6	47467.6	56940.3	59137.9	56980	0.0217995	0.0217995
M202T83	202.186	83.391	8.27926	4-hydroxy-1-(2-hydroxyethyl)-2,2,6,6-tetramethylpiperidine	[M+H]+						85.889	22	10	3	9	27352	298987	222951	244047	160940	155812	391011	116540	168121	132540	241542	130678	181177	119594	133107	253127	173081	195055	188962	195044	0.0182083	0.0182083
M107T204	107.052	203.523	6.71633	4-hydroxybenzyl alcohol	[M+H-H2O]+	HMDB0011724	C17467	Benzenoids	Benzene and substituted derivatives	Benzyl alcohols	204.986	21	9	2	9	9602	34315.1	72980.8	47878.8	79949.5	29753.2	39711.4	49241.1	33996.3	37355.4	73067.7	78036.3	72701.2	22956.2	49790.7	27068	47289	59828.9	61520.2	59923.6	0.0157268	0.0157268
M157T357	157.102	357.046	5.45265	4-hydroxynonenal	[M+H]+	HMDB0004362	C21642	Lipids and lipid-like molecules	Fatty Acyls	Fatty alcohols	364.681	22	9	3	8	11757	23017.5	22671.9	35051.7	24379.6	7889.21	42043.6	24310.2	22011	41276.6	36721.4	17597.8	25029.3	30380.8	19999.6	15702.2	21029.9	24200.4	24160.6	24237.8	0.00159583	0.00159583
M121T209_2	121.068	209.121	9.91742	4-hydroxyphenethyl alcohol	[M+H-H2O]+	HMDB0004284	C06044	Benzenoids	Phenols	Tyrosols and derivatives	210.384	22	10	3	9	151386	130845	224947	256472	756141	164861	329470	528938	34857.4	231307	111747	765559	457441	359952	420703	164494	587630	379639	367835	379591	0.0181035	0.0181035
M172T283	172.103	282.803	2.29619	4-iodosuberoylanilide hydroxamic acid	[M+H-C6H6NI]+			Benzenoids	Benzene and substituted derivatives	Anilides	287.707	21	9	3	9	5057	17267.9	12036.5	22185.6	11408.4	14177.4	15165.9	26936.9	20186.9	9969.5	28460.7	16937.9	22914.7	24092.2	33087.9	24949.1	20163.8	12595.1	13661.3	12235.1	0.0578043	0.0578043
M157T330	157.103	329.899	2.17355	4-methylcyclohexaneacetic acid	[M+H]+			Organic acids and derivatives	Carboxylic acids and derivatives	Carboxylic acids	330.629	21	9	3	7	9028	12753.7	19029.5	16973.5	28664.7	13914.9	26585.7	30176.5	42187.5	14915	23180.9	11612.1	14352.5	19488.2	19414.1	10146.6	10214.1	18576.4	19762	18581.3	0.0360023	0.0360023
M199T47_1	199.093	46.827	0.363217	4-nitrosodiphenylamine	[M+H]+		C19479	Benzenoids	Benzene and substituted derivatives	Aniline and substituted anilines	48.571	22	10	3	9	13531	88895.3	178387	154151	98586.5	61092.1	145943	94088.2	49984	205323	117047	87814.8	67996.1	169025	80751.4	37847.7	130654	95299	113925	113886	0.0997406	0.0997406
M420T344	420.188	343.796	8.18299	4-ohe1-1-n3ade	[M+H]+						346.069	11	5	1	5	7633	10892.1	11273.6	36445.7	14437.6	9937.92	11979.9	22859	14092.5	26613.6	61520.9	20652.7	14271.3	28109.3	13065.2	12171.3	20222.4	12501.7	11702.8	12506.7	0.0378104	0.0378104
M379T289	379.207	288.978	7.74827	4-pregnen-6.beta.,11.beta.,17,21-tetrol-3,20-dione	[M+H]+			Lipids and lipid-like molecules	Steroids and steroid derivatives	Hydroxysteroids	291.037	14	6	1	7	2778	8289.45	10034.8	12874.9	7318.66	9460.97	10098.5	8095.48	9691.34	9866.03	12709.3	8046.78	9203.79	9040.21	6956.64	5151.83	9280.23	9533.64	8469.59	8487.69	0.0689868	0.0689868
M184T42_2	184.066	42.047	6.90555	4-pyridoxic acid	[M+H]+	HMDB0000017	C00847	Organoheterocyclic compounds	Pyridines and derivatives	Pyridinecarboxylic acids and derivatives	42.304	22	10	3	9	563732	911977	1.84977e+06	1.92476e+06	789292	411829	1.9639e+06	1.04923e+06	933377	2.13225e+06	1.61535e+06	652863	671941	1.40143e+06	1.16987e+06	708389	1.27591e+06	1.26944e+06	1.26941e+06	1.27285e+06	0.00155443	0.00155443
M491T143_1	491.288	142.738	0.466134	4-quinazolinamine, 2-(hexahydro-4-methyl-1h-1,4-diazepin-1-yl)-6,7-dimethoxy-n-[1-(phenylmethyl)-4-piperidinyl]-	[M+H]+			Organoheterocyclic compounds	Piperidines	Benzylpiperidines	156.954	18	8	1	7	88793	274332	362700	77716.5	197198	224464	514824	583245	498573	482214	397892	649394	324016	210015	437047	335667	351477	350084	346344	349654	0.00586973	0.00586973
M545T422	545.324	421.762	8.57485	((4r)-4-((3r,5s,7r,9s,10s,12s,13r,14s,17r)-3,7,12-trihydroxy-10,13-dimethylhexadecahydro-1h-cyclopenta[a]phenanthren-17-yl)pentanoyl)glycylglycine	[M+Na]+			Lipids and lipid-like molecules	Steroids and steroid derivatives	Bile acids, alcohols and derivatives	424.133	13	4	2	6	16490	7648.76	10208	23117.6	23799.9	44271.3	22449.3	11686.2	15330.9	65044.4	17038.9	19112.1	25290.5	18618.6	12962.2	15884.4	8272.82	21531.7	21462.3	22548.6	0.0278355	0.0278355
M423T364_1	423.298	363.896	6.50678	4-(tert-butylamino)-6-ethylamino-5h-1,3,5-triazin-2-one	[2M+H]+			Organoheterocyclic compounds	Triazines	Aminotriazines	364.656	13	7	1	5	19825	1303.25	3484.85	46428.3	3220.43	3807.62	4504.54	14341.4	5692.66	4666.45	47538.1	16721.3	11999.4	9256.66	16153.4	21530.2	37915.6	17190.8	16825	16817.4	0.0125958	0.0125958
M144T42	144.052	42.2035	1.86033	5-(2-hydroxyethyl)-4-methylthiazole	[M+H]+	HMDB0032985	C04294	Organoheterocyclic compounds	Azoles	Thiazoles	42.963	22	10	3	9	134929	141959	763817	66502.4	74446.6	39079.4	126271	422537	570423	73851.2	140228	23304.8	30723.5	56439.1	555108	234396	280052	190653	190665	197547	0.020609	0.020609
M272T132_1	272.131	131.957	5.07428	5,2'-O-dimethylcytidine	[M+H]+						133.215	17	9	1	7	13111	34511.7	56480.3	34133.9	27011.1	73742.3	59786.3	60175.6	57112.9	45494.6	35858.7	31737.4	38006.9	30881.1	45446.7	37972.7	36558.4	45622.8	45637.4	43477.9	0.0276663	0.0276663
M297T396	297.188	396.162	0.181806	5,8,11,14-eicosatetraynoic acid	[M+H]+			Lipids and lipid-like molecules	Fatty Acyls	Fatty acids and conjugates	408.839	23	9	2	8	24219	65034.9	19244.8	157101	69764.7	9403.23	11792.1	10854.6	47217.5	13197.3	75815.6	45389.1	59018.3	101340	53925.1	27152.3	107848	37281.9	37338.3	19210	0.334117	0.334117
M491T164_1	491.258	163.928	6.74212	5.alpha.-androstan-3.alpha.,17.beta.-diol-o-3-.beta.-glucuronic acid	[M+Na]+			Lipids and lipid-like molecules	Steroids and steroid derivatives	Steroidal glycosides	164.605	12	5	1	6	33510	9341.14	17488	38834.9	24367.9	131087	19517.6	38821.5	106794	18751.3	32508.5	22369.5	105457	75994.6	13263.7	98706.7	29534.7	52265.4	41214.5	52133.9	0.130674	0.130674
M369T26_1	369.361	25.874	1.9705	5.alpha.-cholest-7-en-3.beta.-ol	[M+H-H2O]+	HMDB0001170	C01189	Lipids and lipid-like molecules	Steroids and steroid derivatives	Cholestane steroids	36.973	17	9	1	7	956202	678993	50146.2	283123	1.16414e+06	380380	637927	1.0498e+06	259979	490122	708011	303216	478743	804940	359092	1.19857e+06	146797	647951	612516	612111	0.0329643	0.0329643
M118T381	118.09	380.885	6.85434	5-aminovaleric acid	[M+H]+	HMDB0003355	C00431	Organic acids and derivatives	Carboxylic acids and derivatives	Amino acids, peptides, and analogues	381.383	22	10	3	9	179321	271920	203201	384585	373323	975960	338233	268561	337400	258191	272959	395475	393485	348569	197206	477389	278155	302263	305721	305771	0.00660231	0.00660231
M160T379_3	160.139	379.154	0.795949	5-aminovaleric acid betaine	[M+H]+			Lipids and lipid-like molecules	Fatty Acyls	Fatty acids and conjugates	379.38	22	10	3	9	2577290	3.04219e+06	1.03957e+07	881687	1.51523e+06	1.05193e+06	9.54201e+06	5.19114e+06	4.2045e+06	8.36123e+06	4.27718e+06	1.04627e+06	1.28961e+06	1.52428e+06	690829	5.01677e+06	5.04428e+06	5.39321e+06	5.36021e+06	5.37566e+06	0.00307081	0.00307081
M255T33_2	255.219	33.0745	4.69951	5-androstene-3.beta.,17.beta.-diol	[M+H-2H2O]+	HMDB0003818	C04295	Lipids and lipid-like molecules	Steroids and steroid derivatives	Androstane steroids	37.691	22	10	2	9	16107	63306.6	65667.5	77897.4	66085.9	41087.5	37776.6	74811	66414.1	48527.2	75061.9	50383	63267.7	62655.7	43166.7	13571.7	45283.5	55604.6	52179.9	52607.6	0.0349031	0.0349031
M335T31	335.266	31.132	4.24668	5.beta.-pregnane-3.alpha.,17-diol-20-one	[M+H]+		C14609	Lipids and lipid-like molecules	Steroids and steroid derivatives	Pregnane steroids	48.792	21	10	1	7	140790	107786	142718	113339	202839	135279	155943	174280	73650.7	117650	169045	193368	254489	247445	103589	118108	141311	188513	168270	164824	0.073609	0.073609
M110T270	110.063	270.072	7.77387	5-hydroxy-2-methylpyridine	[M+H]+			Organoheterocyclic compounds	Pyridines and derivatives	Methylpyridines	271.977	20	9	3	8	5566	9879.46	15712.7	24927.3	15189	3908.65	21579.5	11266.9	13195.9	20375.4	14103	10494.6	11174.1	16903	17683	7752.64	21803.7	10919.9	11102.4	10911.5	0.00982735	0.00982735
M191T177_2	191.124	176.992	8.58981	5-methoxytryptamine	[M+H]+	HMDB0004095	C05659	Organoheterocyclic compounds	Indoles and derivatives	Tryptamines and derivatives	193.865	14	6	3	4	8060	5561.16	18349.5	8570.52	14095.4	5869.54	10552.6	12992.7	26364.7	10175.4	31987.5	4125.35	8366.06	7230.08	17253.3	6702.85	10595.4	7525.04	8301.58	7562.5	0.05617	0.05617
M126T189	126.07	188.693	0.466611	5-methyl-2'-deoxycytidine	[M+H-C5H8O3]+		C03592	Nucleosides, nucleotides, and analogues	Pyrimidine nucleosides	Pyrimidine 2'-deoxyribonucleosides	197.435	28	10	3	9	22274	64911.2	50885.3	38359.5	92431.3	117222	49524.3	60284.3	40096.6	43550.2	36869	109150	71805.9	46255.6	103236	35018.1	98080.6	57548.5	57558.1	58683.1	0.0112599	0.0112599
M134T108	134.064	107.665	6.9831	5-methylbenzotriazole	[M+H]+		C06473				110.379	21	10	3	8	22317	53228.7	67486.4	101391	93982	29203.1	213834	50719.3	47697.6	79119.2	92182.1	51742.8	30644.3	105287	111746	9988.44	51378.6	80512	82359.9	82365.3	0.01307	0.01307
M126T132	126.07	131.978	3.6857	5-methylcytosine	[M+H]+	HMDB0002894	C02376	Organoheterocyclic compounds	Diazines	Pyrimidines and pyrimidine derivatives	133.349	21	10	2	9	18085	45540.6	88870.7	26123.9	49929.4	109205	108555	97195	86217.4	69533.2	44324.6	49196.5	52486.9	53594.9	73729.1	55262.8	58062.5	60601.8	60468.8	60587.9	0.00120707	0.00120707
M291T275_1	291.146	274.82	2.83184	5-(morpholinomethyl)-3-(2-nitrobenzylidenamino)-2-oxazolidinone	[M+H-CO2]+			Benzenoids	Benzene and substituted derivatives	Nitrobenzenes	276.436	14	6	1	7	6555	10505.2	482.145	10511.4	11654.2	4878.46	6269.05	6664.24	9334.84	10335.6	11287.2	18155.3	11067.8	2530.4	12864.3	10064.2	17305.3	8216.53	8751.17	8213.53	0.0368778	0.0368778
M345T323	345.149	322.879	8.33196	5'-o-acetyl-(r)-lisofylline	[M+Na]+			Organoheterocyclic compounds	Imidazopyrimidines	Purines and purine derivatives	328.017	18	8	3	7	4723	15045.9	19454.8	18197.1	26582.7	8303.62	39228.2	26988.2	13846.7	19729.6	24528.8	18247.6	8859.97	27165.1	20344.2	15286	10683.7	13931.2	14560.6	14586.8	0.0258471	0.0258471
M328T422	328.15	421.869	8.12731	6-acetylmorphine	[M+H]+		C11781				433.352	11	7	1	3	11524	9750.88	9160.62	61451.2	20284.6	8352.78	12874.3	17406	12052	12035.3	41171.7	12525.9	16323.1	38721.9	14781.6	20737	30972.5	19017.2	19521.7	19029.5	0.0149969	0.0149969
M160T317	160.066	316.738	3.19404	(+)-6-aminopenicillanic acid	[M+H-C2H3NO]+	HMDB0060618	C02954	Organic acids and derivatives	Carboxylic acids and derivatives	Amino acids, peptides, and analogues	319.771	22	10	3	9	13472	12502.4	18841.7	30651.7	18845.8	5672.15	26405.4	8929.39	8758.36	28419	18187.3	9970.29	9532.66	21745.3	11674.6	4773.69	17990.1	13231.3	13230.7	12967.3	0.011583	0.011583
M492T427	492.134	427.298	2.79996	6h-thieno[3,2-f][1,2,4]triazolo[4,3-a][1,4]diazepine-6-acetamide, 4-(4-chlorophenyl)-n-(4-hydroxyphenyl)-2,3,9-trimethyl-, (6s)-	[M+H]+						432.005	14	9	1	4	2370	1063.54	3079.28	3103.02	3343.49	2043.84	2164.47	3790.61	1220.33	4787.12	2301.18	2100.53	2884.75	3998.95	4660.62	1820.8	1864.38	2493.68	2883.13	2523.16	0.0823435	0.0823435
M164T43	164.076	42.8625	8.94906	6-hydroxy-3,4-dihydro-1h-quinoline-2-one	[M+H]+			Organoheterocyclic compounds	Quinolines and derivatives	Quinolones and derivatives	59.344	24	10	3	9	642063	248948	87533.6	4.53841e+06	38674.4	73989.6	288226	450735	706876	89686.9	1.87734e+06	322313	732750	3.51763e+06	966354	544618	679307	956980	956959	942520	0.0087615	0.0087615
M134T194	134.036	193.953	7.99912	6-hydroxyindole	[M+H]+			Organoheterocyclic compounds	Indoles and derivatives	Hydroxyindoles	194.992	16	7	3	6	25637	15513	18858.7	25182.1	9373.25	106930	10631.1	4609.5	4449.07	10290	10824.7	5513.66	6257.02	24704.8	3465.8	6088.11	9723.3	16139.7	15477.2	16138.7	0.024007	0.024007
M351T244	351.225	243.564	6.28339	6-ketoprostaglandin e1	[M+H-H2O]+	HMDB0004241	C05962	Lipids and lipid-like molecules	Fatty Acyls	Eicosanoids	246.258	18	8	1	9	35344	47383.3	29008.5	34052.5	22567.9	33157.9	37040.1	48854.4	98518	31836	167889	55141.9	44785.2	35677	46627.7	36008.7	132077	42603.6	47024.9	42577.9	0.0580932	0.0580932
M393T198_1	393.248	198.394	4.08988	6-ketoprostaglandin f1.alpha.	[M+Na]+	HMDB0002886	C05961	Lipids and lipid-like molecules	Fatty Acyls	Eicosanoids	203.796	13	6	3	4	117282	60202.8	123649	22209.4	156850	14055.1	119761	925788	42131.4	202071	33202.4	22887	68312.6	105569	28944.6	61629.2	117898	100777	58055.3	101240	0.286076	0.286076
M161T67	161.075	66.6375	9.95975	6-methylchromone	[M+H]+			Organoheterocyclic compounds	Benzopyrans	1-benzopyrans	68.401	18	8	3	7	6942	26467.8	49747.6	22868	14450.9	34902.7	53121.7	11549.9	18085.4	12367.5	3936.87	49246.8	54104.7	22959.9	9320.31	20204.3	13623.4	17920.3	17958.5	19958.8	0.0626493	0.0626493
M182T64	182.054	64.1445	9.50429	6-(methylthio)guanine	[M+H]+			Organoheterocyclic compounds	Imidazopyrimidines	Purines and purine derivatives	65.771	22	10	3	9	10836	37829.1	37765.1	16723.9	12503.6	81017.8	23899.2	22623.3	27774	18423.7	18765.2	17517.6	24405.5	24181.4	27321.2	13326.6	14373.8	24802.3	26344.6	24747.8	0.0358353	0.0358353
M454T287	454.178	286.56	0.671486	6-sialylgalactose	[M+H-H2O]+			Organic oxygen compounds	Organooxygen compounds	Carbohydrates and carbohydrate conjugates	289.772	11	5	1	5	3582	15154	15229.3	18140.1	14382.7	19510.8	17397.4	25808.7	22974.4	15847.5	18518.9	15995.9	18322.4	20017.8	15827.8	17147	8300.98	15416.7	16750.8	15409.7	0.0486956	0.0486956
M585T366_1	585.158	366.464	5.77969	7-[3-[(2r,3r,4r)-3,4-dihydroxy-4-(hydroxymethyl)oxolan-2-yl]oxy-4,5-dihydroxy-6-(hydroxymethyl)oxan-2-yl]oxy-3-(4-methoxyphenyl)chromen-4-one	[M+Na]+			Phenylpropanoids and polyketides	Isoflavonoids	Isoflavonoid O-glycosides	367.997	11	6	1	4	8238	3454.6	4866.72	3849.18	10450.4	65328.7	2099.37	5091.32	7174.93	4181.83	6256.49	11772.1	5279.36	4281.55	5830.56	52550.5	5590.24	16038.3	16018.1	16032.1	0.000645114	0.000645114
M177T33	177.169	33.0745	9.79922	7,8-dihydro-.alpha.-ionone	[M+H-H2O]+			Lipids and lipid-like molecules	Prenol lipids	Sesquiterpenoids	35.695	20	9	3	8	28170	146127	96848.2	87563.6	95770.4	75849.4	93827.3	118929	82402.8	63005	121555	87639.6	89357.7	105574	85967.9	69105.1	80583.4	93273.9	125346	94318.8	0.174692	0.174692
M342T430	342.18	430.012	8.13196	7-acetyllycopsamine	[M+H]+		C16751				445.225	17	5	3	8	8861	20478.8	24246.2	53169.1	22338.2	55533.8	23315	18805.6	19666.1	31944	33093.1	19985.2	31502	34351.3	25084.6	15572.5	51808	26652.4	26698	29238	0.0537545	0.0537545
M417T91	417.344	90.66	7.7646	7.alpha.,12.alpha.-dihydroxycholest-4-en-3-one	[M+H]+		C17339	Lipids and lipid-like molecules	Steroids and steroid derivatives	Cholestane steroids	97.998	13	8	1	3	13493	23833.9	24460.6	14502.4	35792.3	18436.6	20286.9	25371.4	16051.3	21762.1	40140.3	19508.5	71232.5	14812.4	14485.4	17824.3	22978.6	25881.7	33719.2	28647.3	0.135127	0.135127
M365T36_2	365.331	35.6715	3.9633	7.alpha.,24(s)-dihydroxycholesterol	[M+H-3H2O]+	HMDB0060136		Lipids and lipid-like molecules	Steroids and steroid derivatives	Bile acids, alcohols and derivatives	51.141	20	8	2	8	42890	105912	139291	81415.3	99361.6	89847.2	52787.3	131293	120435	69747.5	91349.3	73672.3	81938.2	85599	87293.4	95101	42504.8	110340	89198.1	89914.9	0.124424	0.124424
M401T34_2	401.354	33.7195	9.30765	7.alpha.,27-dihydroxycholesterol	[M+H-H2O]+		C06341	Lipids and lipid-like molecules	Steroids and steroid derivatives	Bile acids, alcohols and derivatives	38.933	16	7	1	8	61553	210067	325731	196921	145169	117562	104623	301475	31690.3	126114	166320	121986	47864.4	188529	136551	90411.2	92150.2	151801	148794	148791	0.0115945	0.0115945
M383T38_2	383.339	38.2885	8.75585	7.alpha.-hydroxy-4-cholesten-3-one	[M+H-H2O]+	HMDB0001993	C05455	Lipids and lipid-like molecules	Steroids and steroid derivatives	Cholestane steroids	53.453	20	9	1	7	68110	307734	432617	280138	210279	143915	204468	466650	441712	202468	284005	190098	194607	294932	141886	340309	126570	206223	217731	206519	0.0312169	0.0312169
M353T88	353.259	88.06	9.84869	7-keto-3.alpha.,12-.alpha.-dihydroxycholanic acid	[M+H-3H2O]+			Lipids and lipid-like molecules	Steroids and steroid derivatives	Bile acids, alcohols and derivatives	90.532	13	6	0	7	75995	198039	232294	79312.7	34768.1	80356.1	14568.8	63478	451894	13609.1	109089	22625.8	84809.6	35473.5	25222.2	594011	37919.5	135637	135132	135639	0.00215785	0.00215785
M150T163	150.082	163.253	1.86126	7-methyladenine	[M+H]+	HMDB0011614	C02241	Organoheterocyclic compounds	Imidazopyrimidines	Purines and purine derivatives	163.937	27	9	3	8	22270	57514	176918	58145.1	83570.5	77444.2	116985	119858	69059.2	127891	75918.1	82379.5	101260	76542.4	103656	52393	78722	77396	77384.7	76412.5	0.00732614	0.00732614
M166T187	166.077	186.746	2.47874	7-methylguanine	[M+H]+	HMDB0000897	C02242	Organoheterocyclic compounds	Imidazopyrimidines	Purines and purine derivatives	187.425	22	10	3	9	37559	136066	221226	131544	172368	198723	187411	135537	162869	149068	91585.2	140535	163182	137930	188809	119347	142147	139000	138997	137561	0.00599079	0.00599079
M335T39_2	335.234	38.97	2.28393	8(9)-epoxy-5z,11z,14z-eicosatrienoic acid, methyl ester	[M+H]+			Lipids and lipid-like molecules	Fatty Acyls	Fatty acid esters	41.552	11	4	1	6	45562	70264.5	119306	17211.5	48931.4	53541.9	98324.3	139153	126776	53841.8	55851.5	270692	76353.6	15223.4	102273	64316.7	209200	115369	113918	114897	0.00645184	0.00645184
M315T76	315.261	75.881	7.90427	9,10-dihydroxy-12z-octadecenoic acid	[M+H]+			Lipids and lipid-like molecules	Fatty Acyls	Fatty acids and conjugates	82.423	21	10	1	9	67328	207844	280751	38377.9	98206.6	556320	55338.2	128398	260575	64897.2	167872	497311	193187	75546.6	198876	118712	253680	184196	183450	183052	0.00316185	0.00316185
M293T243_2	293.222	242.66	4.84609	9-hydroperoxy-10e,12z,15z-octadecatrienoic acid	[M+H-H2O]+			Lipids and lipid-like molecules	Fatty Acyls	Lineolic acids and derivatives	245.608	12	4	2	6	11330	26437.6	26010.6	20873.9	20182.2	27205.3	58023.1	27857.3	29887.7	33375.5	41580.2	25018.9	25607.2	17591.3	21821.9	14132.4	48485	25909.8	28498	25855.5	0.0564466	0.0564466
M310T268	310.246	268.031	2.69334	9-nitrooleic acid	[M+H-H2O]+	HMDB0062738		Lipids and lipid-like molecules	Fatty Acyls	Fatty acids and conjugates	269.447	16	8	1	7	8570	7902.76	1323.76	8152.8	19266.9	54118.7	16085.6	8150.23	8588.45	17913.7	11674.1	4830.66	7705.86	5157.37	7437.05	6027.56	7017.17	13582	12361.7	13584.8	0.0535339	0.0535339
M295T290	295.236	289.611	3.40815	9-oxo-10e,12z-octadecadienoic acid	[M+H]+	HMDB0004669		Lipids and lipid-like molecules	Fatty Acyls	Lineolic acids and derivatives	290.516	22	9	3	9	40213	41645.7	54713.3	43761.4	74035.7	45477.3	31546.7	26918.5	26592.1	92360.3	33816.3	34015.4	158888	63641.8	34868.8	29829.7	32220.2	45135.8	46212.7	46201.5	0.0134911	0.0134911
M293T38	293.219	37.625	2.50572	9-oxo-11-(3-pentyl-2-oxiranyl)-10e-undecenoic acid	[M+H-H2O]+	HMDB0013623		Lipids and lipid-like molecules	Fatty Acyls	Fatty acids and conjugates	43.61	20	9	2	9	173006	613233	330205	277690	229597	234955	265747	890370	182613	140693	579185	507468	345218	447137	480622	490091	178956	456833	450144	450149	0.00853351	0.00853351
M265T273	265.163	272.8	9.07896	(+)-abscisic acid	[M+H]+		C06082	Lipids and lipid-like molecules	Prenol lipids	Sesquiterpenoids	273.877	17	8	2	7	3631	6828.22	5987.2	14339.2	8657.72	6025.6	6271.68	7332.54	4352.13	8863.23	10668.5	8363.96	13505.9	17080.4	8331.78	4890.11	10074.7	9127.28	10210.8	9205.08	0.0635234	0.0635234
M347T288	347.106	287.79	3.95186	Acetohexamide	[M+Na]+	HMDB0014558	C06806	Organic oxygen compounds	Organooxygen compounds	Carbonyl compounds	290.249	16	8	2	6	4242	6098.63	8950.62	7859.51	9124.9	26454.4	7281.28	7521.75	14132.8	5729.67	7436.51	10390.4	11047.2	7422.99	9581.84	12467.4	5776.09	11801	12279.9	12318.1	0.023748	0.023748
M139T148	139.091	147.63	3.41354	Acetoveratrone	[M+H-C2H2O]+			Organic oxygen compounds	Organooxygen compounds	Carbonyl compounds	153.516	17	8	3	6	32520	170122	32806.4	27710.1	122832	86052.9	53962.9	35518.4	23181.1	40977	28854.3	10969.1	22602.9	22051.9	24519.8	17138.9	35950.2	37729	38030.2	37729.1	0.00459578	0.00459578
M136T259	136.08	259.253	9.0689	Acetylaniline	[M+H]+	HMDB0001250	C07565				261.167	17	7	3	7	4090	9989.4	13209.6	18436	19955.1	10435.6	10825.4	17871.1	12328.5	19756.8	23214.9	8304.42	10210.1	13797.3	16634.8	17518.8	15395.5	11899.8	12197.1	11907.6	0.0141211	0.0141211
M146T372_2	146.123	371.664	7.17899	Acetylcholine	[M]+	HMDB0000895	C01996	Organic nitrogen compounds	Organonitrogen compounds	Quaternary ammonium salts	372.314	22	10	3	9	1802958	4.76423e+06	1.97046e+06	2.98277e+06	4.67316e+06	1.98638e+06	4.34352e+06	7.8722e+06	3.33698e+06	4.71875e+06	7.96343e+06	1.69063e+06	3.33944e+06	3.34044e+06	2.3927e+06	6.33906e+06	4.73162e+06	4.02377e+06	4.05762e+06	4.05785e+06	0.00484651	0.00484651
M218T322	218.121	321.51	4.03545	Acetylcitrulline	[M+H]+			Organic acids and derivatives	Carboxylic acids and derivatives	Amino acids, peptides, and analogues	327.9	21	9	3	9	25907	12163.2	9073.17	5472.83	33836.1	39996.2	19257.4	23425.5	45737.9	15459.5	14519.2	26369.8	20286.1	8214.6	26155.4	19758.7	42632.3	22525.6	23253.2	22522.5	0.0184904	0.0184904
M136T162_2	136.067	161.977	2.38067	Adenine	[M+H]+	HMDB0000034	C00147	Organoheterocyclic compounds	Imidazopyrimidines	Purines and purine derivatives	162.663	22	10	3	9	2988947	7.35168e+06	3.27735e+06	3.49491e+06	1.05002e+07	1.549e+07	6.76307e+06	4.03337e+06	5.56513e+06	1.98012e+06	8.872e+06	9.92935e+06	2.39326e+06	8.3812e+06	4.37174e+06	2.43009e+06	1.06583e+07	6.24486e+06	6.24746e+06	6.50744e+06	0.0238196	0.0238196
M268T171_1	268.112	171.125	2.92576	Adenosine	[M+H]+	HMDB0000050	C00212				172.134	18	10	1	7	351693	1.06656e+06	1.74346e+06	503030	679280	377915	1.79522e+06	1.3072e+06	1.43771e+06	1.35135e+06	1.32527e+06	1.16454e+06	1.83716e+06	1.13327e+06	1.32121e+06	1.66044e+06	773635	968644	968635	962969	0.00338621	0.00338621
M330T273_1	330.069	273.168	1.93	Adenosine 2'-monophosphate	[M+H-H2O]+		C00946	Organic oxygen compounds	Organooxygen compounds	Carbohydrates and carbohydrate conjugates	274.893	17	10	1	6	16731	18658.8	26333.3	8831.62	19130.6	6264.39	36395	23640.8	10735.2	58811.7	7137.81	11147.7	13621.5	10432.9	11282.9	15747	5060.56	19229.5	18883.6	19226.3	0.0104008	0.0104008
M348T406	348.081	406.06	9.22558	Adenosine 3'-monophosphate	[M+H]+	HMDB0003540	C01367				407.803	10	5	0	5	20745	4794.1	46145.6	53456.1	37654.7	21026.2	6645.43	131401	32278	28710.2	35409.1	9719.97	51841.8	33643.8	4902.75	9271.98	15563.5	36328.9	36753.5	36327.9	0.00672961	0.00672961
M348T431	348.082	431.49	5.16852	Adenosine 5'-monophosphate	[M+H]+	HMDB0000045	C00020	Nucleosides, nucleotides, and analogues	Purine nucleotides	Purine ribonucleotides	433.968	20	8	3	9	19324	12859.6	52482.9	26774.6	47378.3	8291.89	22937.8	67591.9	10071.2	37443.6	41536.8	16745.7	28738.3	14849.6	54894.8	92997.8	13154.9	34605.5	37184.1	34624.2	0.0418196	0.0418196
M301T404	301.184	403.771	0.324833	Adrenosterone	[M+H]+	HMDB0006772	C05285	Lipids and lipid-like molecules	Steroids and steroid derivatives	Androstane steroids	417.185	22	9	2	7	17920	25873.6	21898.6	67386.3	36908.6	14041.3	22348.6	43137.6	31817.4	13868.6	60364.4	49030.3	60608.4	47857.5	61656	28414.1	67805.6	37779.9	36891.1	36889.4	0.0138134	0.0138134
M434T332_1	434.301	332.104	1.89089	Agaric acid	[M+NH4]+			Organic acids and derivatives	Carboxylic acids and derivatives	Tricarboxylic acids and derivatives	333.219	17	9	1	7	3237	4713.23	20208.3	6352.79	6505.4	10228	14329.8	14910.5	5679.89	10944.3	12434.9	7586.54	13384.6	8721.09	7572.45	3664.76	4966.96	13280.9	12581.8	14279	0.0637466	0.0637466
M114T315	114.095	314.761	7.78627	Agmatine	[M+H-NH3]+	HMDB0001432	C00179	Organic nitrogen compounds	Organonitrogen compounds	Guanidines	316.087	22	10	3	9	103926	109796	387736	75009	115457	875205	68556	187025	377332	105295	103378	460390	305282	80377.2	209607	195265	311971	219397	219391	223039	0.0095398	0.0095398
M353T407	353.189	406.921	1.80909	Ajmalicine	[M+H]+		C09024				408.256	13	8	1	4	8914	13507.8	15034.5	52011.3	12425.3	13073.3	18731	20847.6	9706.28	20348.7	39856.5	20908.7	14801.1	33693.3	16148.4	19231	33956.4	22626	19315.9	22625	0.0887812	0.0887812
M327T388	327.201	388.088	8.48196	Ajmaline	[M+H]+		C06542				390.47	11	5	1	5	8834	20839.8	16409	41377.1	23391.2	4825.67	32061.8	22222.7	26804.6	20531.7	35042.3	22658	23973.4	22630.6	24592.5	25279.4	45980	25861.3	25371.5	26468.8	0.0212229	0.0212229
M144T184	144.086	183.522	6.73545	Ala-Ala	[M+H-NH3]+	HMDB0000303	C00398	Organoheterocyclic compounds	Indoles and derivatives	Tryptamines and derivatives	184.386	22	10	3	9	383126	307222	369341	569139	878417	103511	772078	1.54887e+06	270996	876071	784527	1.20179e+06	1.15536e+06	1.25681e+06	1.1388e+06	306173	474507	863576	851730	851718	0.00799685	0.00799685
M317T412_2	317.204	412.065	9.41592	Ala-Ala-Arg	[M+H]+			Organic acids and derivatives	Carboxylic acids and derivatives	Amino acids, peptides, and analogues	413.133	20	8	3	9	30623	41602.4	89957.2	70133.4	46195.7	63761.3	195436	52676.7	73397.4	124098	52803.6	55290.4	72328.6	45951.3	21042.7	64060	65717.7	62121.8	62097.1	60291.5	0.0170672	0.0170672
M289T427_2	289.197	426.649	4.63559	Ala-Ala-Lys	[M+H]+			Organic acids and derivatives	Carboxylic acids and derivatives	Amino acids, peptides, and analogues	427.815	14	5	2	7	25254	33789	50488.8	50501.3	34966.2	24771.1	106919	30369.4	76378.8	88975.4	53824.8	35036.3	76075.4	32550	34822.1	85941.1	27278.7	64392.6	80486.2	70228	0.113629	0.113629
M218T350	218.121	350.036	4.26259	Ala-Gln	[M+H]+			Organic acids and derivatives	Carboxylic acids and derivatives	Amino acids, peptides, and analogues	362.964	31	10	3	9	9292	7525.37	19496.5	21221.5	18576	12318.1	32415.9	14014.9	18052.1	13134.3	19167.7	26486	16854.5	17633.7	19988.1	13323.5	20004.6	14465.1	14355.1	13049.4	0.0564292	0.0564292
M374T427	374.226	427.483	6.28785	Ala-Gln-Arg	[M+H]+			Organic acids and derivatives	Carboxylic acids and derivatives	Amino acids, peptides, and analogues	441.858	21	8	1	8	32415	33789.1	146289	54197.3	20223.2	48566.7	197340	42831.4	70116.8	61572.3	52202.4	75284.1	66632.2	45727.7	29734.1	27111.9	37600.9	64955.8	61013.2	64935.2	0.0356782	0.0356782
M375T440	375.209	439.842	5.30354	Ala-Glu-Arg	[M+H]+			Organic acids and derivatives	Carboxylic acids and derivatives	Amino acids, peptides, and analogues	450.822	25	9	1	8	12022	7356.45	26632	41756.4	44284.3	14831	60934.4	11636.6	19516.4	30497.3	25101.8	17528	24665.2	34918.4	10179.3	25254.5	16510	33185.8	32475	27783.9	0.0942328	0.0942328
M275T405	275.171	405.021	2.38211	Ala-Gly-Lys	[M+H]+			Organic acids and derivatives	Carboxylic acids and derivatives	Amino acids, peptides, and analogues	407.586	13	6	2	5	7287	12972.7	35580.1	37996.8	24418.5	14121.7	23190.1	9866.21	17537.5	32705.7	34409.6	21636	25343.5	26306.5	17858.7	16085.9	30736.9	16811.7	15378.1	16162.9	0.0445394	0.0445394
M218T427	218.157	427.117	9.54036	Ala-Lys	[M+H]+			Organic acids and derivatives	Carboxylic acids and derivatives	Amino acids, peptides, and analogues	429.732	20	9	3	8	30921	55452.4	55324	189256	44801.2	171694	159142	33328	113609	87100.2	59944	64707.7	57199	57334.7	48834.2	77063	52255.8	66821.6	69711.3	70072.8	0.0258746	0.0258746
M377T359	377.211	359.091	4.19122	Ala-Met-Arg	[M+H]+			Organic acids and derivatives	Carboxylic acids and derivatives	Amino acids, peptides, and analogues	360.189	14	5	3	6	3656	5733.53	14330.9	14888.9	7002.13	17854.4	57154.2	4255.22	11171.7	30018.7	22854.6	7400.42	14003.6	15302.3	8815.75	10835.7	5753.47	8497.57	10476.7	10508.4	0.117212	0.117212
M90T345	90.0581	345.079	2.43384	Alanine	[M+H]+	HMDB0000161	C00041	Organic acids and derivatives	Carboxylic acids and derivatives	Amino acids, peptides, and analogues	346.299	22	10	3	9	37505	29199.7	59347.3	70522.8	66429.6	125124	58792.5	65928.6	74012.7	64929.8	61019.6	49056	61672	58190.3	49295.9	121152	28837.4	138910	140690	139396	0.00658521	0.00658521
M132T268_2	132.106	268.342	1.42594	Alanine betaine	[M+H]+			Organic acids and derivatives	Carboxylic acids and derivatives	Amino acids, peptides, and analogues	273.831	23	10	3	9	376922	606142	1.80307e+06	634741	671278	1.56435e+06	1.84946e+06	1.61335e+06	1.56188e+06	2.02311e+06	915113	619047	912564	726375	1.04722e+06	855149	764236	1.00367e+06	1.03552e+06	1.00371e+06	0.0181159	0.0181159
M237T232	237.129	231.562	0.678188	Ala-phe	[M+H]+			Organic acids and derivatives	Carboxylic acids and derivatives	Amino acids, peptides, and analogues	242.883	21	10	3	8	12879	4642.34	7436.01	14916	7318.1	15316	33613.4	6796.96	9744.3	13648.2	7172.69	9989.88	10720.7	8627.19	5087.33	8078.12	7127.53	2226.96	4002.64	2643.87	0.313927	0.313927
M187T331	187.114	330.928	1.08709	Ala-Pro	[M+H]+	HMDB0028695		Organic acids and derivatives	Carboxylic acids and derivatives	Amino acids, peptides, and analogues	331.856	21	8	3	8	34659	18556.1	26606.5	40503.8	66975.7	96045.5	49307.3	26927.6	25567.7	32697.8	32938.9	42798	105268	20207.7	25924.7	30788.7	28448.9	43928	44041.3	72596.3	0.308641	0.308641
M347T408_1	347.213	408.313	6.10886	Ala-Thr-Arg	[M+H]+			Organic acids and derivatives	Carboxylic acids and derivatives	Amino acids, peptides, and analogues	410.306	17	9	1	7	18295	20854.8	46906.5	38690.7	27853.9	37332	98955.5	33738.8	35044.8	67545	26070.1	31101	34082.5	25597.6	11487.7	29943.4	32989.2	32392.4	32870.3	33199.1	0.0123586	0.0123586
M345T369_1	345.234	369.135	2.66413	Ala-Val-Arg	[M+H]+			Organic acids and derivatives	Carboxylic acids and derivatives	Amino acids, peptides, and analogues	369.806	17	9	1	7	18716	28507.9	54194.1	84973.8	29658.7	160243	169935	24050.9	38597	113265	39814.7	36449.7	41108.5	60186.8	12740.2	80453.9	30630	41291	41285.4	40457	0.0117018	0.0117018
M317T385	317.227	385.174	4.19037	Ala-Val-Lys	[M+H]+			Organic acids and derivatives	Carboxylic acids and derivatives	Amino acids, peptides, and analogues	387.017	19	10	1	8	22767	18172.5	41314.7	44182	19810.8	62394.8	100794	37142	23992.4	86846.8	37945.4	22453.3	55727.9	23740.9	21748.6	22560.3	38425.1	38102.9	42235.8	38136.3	0.0601782	0.0601782
M343T227	343.172	226.916	6.10271	Aldosterone	[M+H-H2O]+		C01780	Lipids and lipid-like molecules	Steroids and steroid derivatives	Hydroxysteroids	228.029	17	9	1	7	62319	39698.4	37735	77577.8	113500	29270.1	40669.5	83974	67638.8	189642	222196	33893.8	56921.6	57680.6	113295	103964	45088.8	67684.4	71308.8	67676.1	0.0304104	0.0304104
M513T327	513.355	327.464	2.58021	Alisol a	[M+Na]+		C17459	Lipids and lipid-like molecules	Prenol lipids	Triterpenoids	328.488	12	5	1	6	3018	5365.35	9901.54	4287.83	5613.32	9480.42	10933.7	7687.08	4819.02	19296.5	8773.94	4965.35	7493.49	5368.91	3830.8	3373.34	6427.49	6864.38	6408.26	6857.25	0.038943	0.038943
M281T309	281.195	309.057	6.75202	All-trans-4-hydroxyretinoic acid	[M+H-2H2O]+	HMDB0006254	C16677	Lipids and lipid-like molecules	Prenol lipids	Retinoids	311.386	16	8	2	6	3079	10858	2449.68	18394.4	7790.94	3390.5	6524.47	7624.9	10078.5	3962.48	13002.3	9213.3	8273.15	14353.1	13492.2	4720.81	13298.2	8661.47	8398.56	8800.06	0.0236583	0.0236583
M185T346	185.135	346.281	7.12845	Allyl 3-amino-1-piperidinecarboxylate	[M+H]+			Organoheterocyclic compounds	Piperidines	Piperidinecarboxylic acids and derivatives	357.095	16	7	1	7	8324	13719.9	12604.1	48799.1	13614.2	11759	21482.2	9893.96	17170.4	14490.3	33719.3	9186.68	12968.2	27647.2	10188.4	20738	14470.3	14137.7	14106.7	12072.3	0.0880718	0.0880718
M217T229	217.105	228.555	9.54201	.alpha.-cyclohexylmandelic acid	[M+H-H2O]+						230.272	13	6	1	6	8362	11349.7	14562.4	15670.6	33679.4	9468.71	24861.9	7510.68	11883.9	15269.9	35455	12312	13140.9	10625.2	13019.7	11897.3	15093.2	11479.7	13373.1	13355.2	0.08543	0.08543
M558T200	558.315	200.336	2.68891	.alpha.-ergocryptine	[M+H-H2O]+		C07545	Alkaloids and derivatives	Ergoline and derivatives	Lysergic acids and derivatives	206.936	18	6	3	6	29302	18878.6	15763.5	15371.3	43410.1	85407	26505.8	14865.8	34234.3	17021.1	24396.3	49938.5	32448.8	26676.7	15228.5	11094.6	33511.8	22278.4	23630.5	23639.4	0.0337835	0.0337835
M773T439_1	773.444	439.219	2.18634	.alpha.-hederin	[M+Na]+		C08954	Lipids and lipid-like molecules	Prenol lipids	Triterpenoids	441.357	11	6	1	4	3312	6254.85	18774.3	9463.98	8436.22	16563	19596.7	10228.1	9477.4	11505.7	8910.55	18259.7	13778.4	6541.39	9291.3	11330.5	8093.93	10070.6	10322.7	10324.9	0.014274	0.014274
M175T34	175.153	33.721	4.55239	.alpha.-ionone	[M+H-H2O]+	HMDB0059883	C12286	Lipids and lipid-like molecules	Prenol lipids	Sesquiterpenoids	36.333	21	9	3	9	43937	100405	138740	132289	128115	144315	104342	157214	131456	104743	126110	198264	152213	125302	132210	96511.6	122636	126668	128420	127247	0.00700576	0.00700576
M165T32	165.096	32.4345	1.6705	(+)-.alpha.-tocopherol	[M+H-C19H38]+	HMDB0001893	C02477	Lipids and lipid-like molecules	Prenol lipids	Quinone and hydroquinone lipids	33.076	22	10	3	9	87255	124935	171035	174561	182382	70450	121386	143496	148777	130763	200975	92025.2	154560	240737	106992	130429	90420.9	158140	153497	153203	0.0178751	0.0178751
M536T189_1	536.415	188.967	9.40999	.alpha.-tocopherol nicotinate	[M+H]+		C12981	Lipids and lipid-like molecules	Prenol lipids	Quinone and hydroquinone lipids	189.772	10	7	0	3	19049	13508	20545.9	2117.31	13549.4	15168.1	4517.9	49251.5	42574.8	17664.3	22830.1	25021.9	10346	7028.89	6120.41	55406.2	12382	24152.9	24138	22804.7	0.0326668	0.0326668
M431T132_1	431.399	131.754	4.52493	alpha-Tocopherol (Vitamin E)	[M+H]+	HMDB0001893	C02477	Lipids and lipid-like molecules	Prenol lipids	Quinone and hydroquinone lipids	133.106	16	8	1	7	14285	36634.3	47932.1	42229.3	71555.9	32632.8	25054.8	48537	31075.2	77355.2	30801.7	29251.8	65715.5	81736.8	47191.1	76252.4	24119.9	48833.8	48839.8	47925.1	0.0108467	0.0108467
M473T30	473.409	30.4755	8.21181	.alpha.-tocopheryl acetate	[M+H]+			Lipids and lipid-like molecules	Prenol lipids	Quinone and hydroquinone lipids	31.093	14	9	1	4	144237	267201	221562	171217	65446.3	64279.3	212268	166041	239603	126851	120001	128141	211602	212138	172808	54472.9	107733	151475	145401	151509	0.0235288	0.0235288
M135T244	135.121	244.055	8.00226	Amantadine	[M+H-NH3]+	HMDB0015051	C06818	Organic nitrogen compounds	Organonitrogen compounds	Amines	246.258	32	10	3	9	8854	13111.6	18809.3	32033.1	15453.8	8191.05	24376.3	17932.6	17870.6	27388.8	23035.4	10429	22867.9	18800	21860.1	14626.9	21086.3	19571.8	21819.3	19342.2	0.0676083	0.0676083
M568T221	568.291	221.16	3.17014	Amikacin	[M+H-H2O]+	HMDB0014622	C06820	Organic oxygen compounds	Organooxygen compounds	Carbohydrates and carbohydrate conjugates	222.376	11	5	1	5	4497	6988.27	15471.8	7811.89	7680.3	17799.3	16516.6	9948.23	12379.9	6759.24	7130.83	15635.9	13006.6	3499.52	8136.23	7465.66	7741.7	8370.71	7990.63	8367.08	0.0264959	0.0264959
M528T447	528.207	446.63	8.88356	Amprenavir	[M+Na]+	HMDB0014839	C08086	Benzenoids	Benzene and substituted derivatives	Benzenesulfonamides	460.467	17	8	1	3	25487	107013	68273.9	120476	102916	135413	71275.2	73215	72294.9	50650.5	105525	108964	229101	85331	104665	97075.6	76402.4	92991.8	97739	92741.8	0.0297991	0.0297991
M509T321	509.257	321.469	0.275317	Andrastin a	[M+Na]+			Lipids and lipid-like molecules	Steroids and steroid derivatives	Steroid esters	323.095	13	4	3	6	2625	4619.13	10590.4	17197.3	16511.1	13023.4	11420.5	8828.39	12152.4	16720.9	18110.7	5697.01	10888.7	10870.8	8861.98	14602.5	9650.04	11165.5	11168.1	9466.14	0.0926316	0.0926316
M257T32_2	257.234	32.423	8.93918	Androstane-3,17-diol, (3.beta.,5.alpha.,17.beta.)-	[M+H-2H2O]+	HMDB0000493	C12525	Lipids and lipid-like molecules	Steroids and steroid derivatives	Androstane steroids	34.36	17	7	3	6	42140	19797.5	63493.7	40871.1	53612.7	81720.8	66182.6	58697	50114.4	71646	69120.3	25711.8	77374.2	22333	25553	28752.7	50677.2	16923.4	21888	16884.6	0.154999	0.154999
M523T328	523.237	327.994	3.42011	Angeloylgomisin h	[M+Na]+			Phenylpropanoids and polyketides	Tannins	Hydrolyzable tannins	329.054	12	7	2	3	9750	9082.1	6311.97	8194.43	10923.9	6455.89	28571.6	6884.73	6009.15	15649.5	8069.68	8855.27	12392.5	5966.13	7193.93	5625.83	6901.94	6559.83	6428.64	5149.31	0.12889	0.12889
M535T366_1	535.17	366.419	7.61842	Aprepitant	[M+H]+	HMDB0014811	C21555	Organoheterocyclic compounds	Oxazinanes	Morpholines	367.114	14	5	1	6	25121	7273.46	9907.75	15013	18425.9	5027.03	71533.8	9182.9	21969.8	19113.8	9747.82	4966.14	19648.7	5837.46	9281.51	23095.3	7791.35	13457.1	13304.3	13415.3	0.00589932	0.00589932
M305T101_3	305.257	101.471	4.45669	Arachidonic acid (peroxide free)	[M+H]+	HMDB0001043	C00219	Lipids and lipid-like molecules	Fatty Acyls	Fatty acids and conjugates	103.976	13	6	3	4	7459	42320.7	67405.2	31867.8	47246.2	65201.2	59209.2	52883.2	39054.3	45719.2	40959.1	26942.2	40928.8	32977.1	47684.6	12746.9	54263.5	36074.4	39776.6	40972.3	0.0655752	0.0655752
M341T247	341.203	246.562	7.73941	Arachidonic sulfonic acid	[M+H]+			Organic acids and derivatives	Organic sulfonic acids and derivatives	Organosulfonic acids and derivatives	250.793	19	7	2	5	5178	23939.3	18980.1	27626.9	48138.3	14634.8	20265.9	18014	21032.5	34383.5	60146.3	29753.8	17286	15263.3	17785.1	17974.3	12037.8	18690.8	18704.1	20059.9	0.0410749	0.0410749
M356T138	356.363	138.43	5.99122	Arachidoyl ethanolamide	[M+H]+			Organic nitrogen compounds	Organonitrogen compounds	Amines	141.006	11	6	1	4	24654	77951.3	4799.56	1604.25	183526	118106	6365.86	5395.43	19363.1	12701.8	16318.1	13816.9	11299	14990.1	14960.8	16425	13767.2	35460.4	35436.6	36522	0.0173135	0.0173135
M173T79	173.134	79.499	4.67065	Arcaine	[M+H]+		C03047	Organic nitrogen compounds	Organonitrogen compounds	Guanidines	83.597	19	8	3	8	54214	157939	401231	62085.1	318166	361499	215204	174479	167925	102344	118152	142391	106717	46974.9	84988.5	73205.3	58152.4	136774	137180	136776	0.00170675	0.00170675
M373T208	373.183	207.567	5.73083	Arctigenin	[M+H]+	HMDB0030087	C10545	Lignans, neolignans and related compounds	Furanoid lignans	Tetrahydrofuran lignans	221.83	16	7	1	6	7755	8775.08	13282.6	15629.8	11200.8	10259.3	5771.38	33798	15256.3	43442.9	26288.7	6096.14	11936.7	8446.37	35218.6	28777.1	10664.6	15168.8	15149.4	16698.6	0.0567158	0.0567158
M246T408	246.163	408.321	4.69609	Arg-Ala	[M+H]+			Organic acids and derivatives	Carboxylic acids and derivatives	Amino acids, peptides, and analogues	419.601	24	10	3	9	56766	137658	189887	361258	84193.8	440710	510951	93935.2	288070	237146	98442.4	162105	127420	145193	27997.5	249350	166955	185613	186943	184711	0.00604406	0.00604406
M290T453	290.152	453.264	4.13786	Arg-asp	[M+H]+			Organic acids and derivatives	Carboxylic acids and derivatives	Amino acids, peptides, and analogues	458.754	13	7	1	5	9836	10292	10316.8	35458	22846.7	20568.5	30245.5	7667.86	12759.6	21890.3	20056.1	9863.99	12191.3	20845.9	9945.35	30769	8966.23	17055.4	17348.1	17057.2	0.00981986	0.00981986
M304T450	304.167	449.714	2.85902	Arg-glu	[M+H]+			Organic acids and derivatives	Carboxylic acids and derivatives	Amino acids, peptides, and analogues	453.944	10	8	0	2	24847	21406.6	30832.6	109482	49265.5	60289.5	64866.7	18256	34814.4	69040	45480.1	36157.4	29592.8	48630.2	22091.6	95104.4	20239.3	43241.3	46304.7	46555.9	0.0406779	0.0406779
M347T219	347.168	219.442	1.13991	Arg-Gly-Asp	[M+H]+			Organic acids and derivatives	Carboxylic acids and derivatives	Amino acids, peptides, and analogues	221.173	19	10	1	8	28452	15556.3	21884	35665.3	87337.9	8627.46	17533.7	45388.5	30968.5	102278	61577.2	12402.6	25208.7	18910.5	51228.7	56602.2	14895.2	30572	31440	31513.7	0.0167987	0.0167987
M158T382_1	158.086	382.055	3.79929	Arginine	[M+H-NH3]+	HMDB0000517	C00062	Organic acids and derivatives	Carboxylic acids and derivatives	Amino acids, peptides, and analogues	383.128	21	9	3	9	13863	17730.6	16493.1	17594.1	24759.4	8561.51	12186.2	29512.7	45523.5	31671.4	41940.1	54809.3	38344.2	15985.6	33832.4	7126.34	58014.1	25228	25647.9	25246.7	0.0093484	0.0093484
M288T329_1	288.212	328.689	3.80147	Arg-Leu	[M+H]+			Organic acids and derivatives	Carboxylic acids and derivatives	Amino acids, peptides, and analogues	329.375	15	9	1	5	73216	77229.2	153442	138880	61982.8	411823	160156	45154.8	70012.9	355571	42278.5	113812	64566.7	71805.3	29487	83418.1	62388.3	96103.4	98207.4	96097.8	0.0125649	0.0125649
M416T356	416.274	356.203	4.13489	Arg-Leu-Lys	[M+H]+			Organic acids and derivatives	Carboxylic acids and derivatives	Amino acids, peptides, and analogues	356.918	17	9	1	7	18934	36861.7	54135.1	55267.3	25405.4	72970.8	91475.6	24276.5	60488.7	40481.6	49879.6	79874.2	70354.2	31621	20133.4	30889.9	55636.8	44521.3	44507.1	43664.3	0.0110948	0.0110948
M306T357	306.17	357.399	6.55714	Arg-Met	[M+H]+			Organic acids and derivatives	Carboxylic acids and derivatives	Amino acids, peptides, and analogues	358.938	16	6	3	7	8481	18260.4	24343.2	30612.4	10071.1	56463.2	59636.5	7069.47	28352	11424.4	14549.8	26003.7	12209.4	17686.1	10058	18813.3	15806.7	19106.4	18876.6	15755.9	0.104485	0.104485
M322T332_2	322.198	331.86	0.202479	Arg-phe	[M+H]+			Organic acids and derivatives	Carboxylic acids and derivatives	Amino acids, peptides, and analogues	332.867	17	7	3	7	23437	16754	21581.6	45980.1	27871.4	101120	80089	14567.4	29141.5	21814.4	21318.5	46870.5	21683.4	19941.8	10825.3	26441.5	17491	27908.6	27907.6	27594.9	0.00650302	0.00650302
M272T444	272.181	443.851	2.88434	Arg-Pro	[M+H]+			Organic acids and derivatives	Carboxylic acids and derivatives	Amino acids, peptides, and analogues	445.672	21	9	3	9	38557	82520.5	96998.8	162196	191033	474601	387298	52834.4	96210	118451	86174	76819.1	117939	63037.7	33975.4	113853	49484.8	135587	139436	141792	0.0225465	0.0225465
M428T163	428.282	163.163	6.3112	Arg-Pro-Arg	[M+H]+			Organic acids and derivatives	Carboxylic acids and derivatives	Amino acids, peptides, and analogues	178.937	13	6	1	6	3368	10991.5	23862.7	11354.1	18553.9	8605.64	19440	5271.65	10635.6	23845.7	11251.3	8380.39	16108.1	13308.3	11757	8597.26	10203.6	16568.6	16555	18748.8	0.0730249	0.0730249
M369T449	369.233	449.029	7.67342	Arg-Pro-Pro	[M+H]+			Organic acids and derivatives	Carboxylic acids and derivatives	Amino acids, peptides, and analogues	453.294	13	6	1	5	3160	15218.9	22840.6	32080.3	31257.4	29252.2	27542.5	21593.2	18880.4	34789.1	23602.6	21382.4	25149	23229.1	15591.8	20695.9	22723.7	20686.6	18752.5	20700.3	0.0559025	0.0559025
M276T401_1	276.173	400.621	2.44266	Arg-Thr	[M+H]+			Organic acids and derivatives	Carboxylic acids and derivatives	Amino acids, peptides, and analogues	403.659	17	9	1	7	24518	50646.3	80901	113610	45270.5	160262	132848	37983.9	75619.7	129731	46804	67310.3	44916.2	50822.4	9798.71	87608.2	67064.3	66473.7	69389.7	69408.3	0.0246842	0.0246842
M259T398	259.148	398.495	4.18483	Arg-Trp-Arg	[M+2H]2+			Organic acids and derivatives	Carboxylic acids and derivatives	Amino acids, peptides, and analogues	401.844	24	8	2	9	16688	17764.1	32742.8	20861.1	21479.8	13409.8	52696	37529.4	31235.8	38654.6	38479.2	20578.6	21086.2	17721.3	39972	15841.5	29391.3	40267.9	38120.9	38176.9	0.0314937	0.0314937
M274T352	274.198	351.683	4.62647	Arg-Val	[M+H]+			Organic acids and derivatives	Carboxylic acids and derivatives	Amino acids, peptides, and analogues	359.021	18	6	3	8	34277	44421.6	100949	174859	63445	176323	165822	35206.7	26786	224822	54088.5	67324.4	66496.8	65223.8	29490.2	84781	49010.3	58815.3	61301.4	58832.6	0.0239801	0.0239801
M283T404	283.176	404.143	9.58373	Artemisinin	[M+H]+		C09538	Lipids and lipid-like molecules	Prenol lipids	Terpene lactones	405.124	19	8	3	8	77608	91793.5	19159.5	222782	99805.1	17362.3	20723.9	121345	83210.6	19897.7	154667	89119.6	129408	138021	89585.3	71579.5	153219	95131.2	95131.3	94991.3	0.000850057	0.000850058
M332T439	332.204	438.76	7.26253	Asn-Ala-Lys	[M+H]+			Organic acids and derivatives	Carboxylic acids and derivatives	Amino acids, peptides, and analogues	450.121	26	8	2	9	17111	11485.2	24341.3	21719.3	16165.5	30076.4	49346.1	13559.5	20887	63769.5	16516	16990.9	23485.1	26800.6	13454.1	21454	12201.3	24722.1	27846.8	24271.4	0.0760244	0.0760244
M289T423	289.17	422.696	8.54882	Asn-Arg	[M+H]+			Organic acids and derivatives	Carboxylic acids and derivatives	Amino acids, peptides, and analogues	425.095	19	10	1	8	28207	41128	81409.5	95405.1	34807	156190	122543	41047.5	75746.3	87900.4	32581	141931	58484.2	53216.5	17428.5	90687.6	43725.4	72122.6	72121	71023.6	0.00883596	0.00883596
M417T450_1	417.231	450.138	5.76264	Asn-Gln-Arg	[M+H]+			Organic acids and derivatives	Carboxylic acids and derivatives	Amino acids, peptides, and analogues	452.857	14	7	1	6	9240	10627.8	19803.1	22991.3	15815.9	43476.9	40644.8	13636	13262.8	39933.2	17212.6	22022.4	17758.2	17994.9	8883.33	13292.8	11205.8	19051.9	19147.9	19147.9	0.00289934	0.00289934
M389T461	389.222	460.808	9.91025	Asn-Gln-Lys	[M+H]+			Organic acids and derivatives	Carboxylic acids and derivatives	Amino acids, peptides, and analogues	465.832	13	7	3	3	6754	12992.1	13069.7	15401.1	20088	20367.5	30078.7	20740.8	16544.3	23777.2	6895.13	22326.8	14960.8	14000.6	5117.15	24496	22527.7	37402.7	31729	36425.2	0.0862039	0.0862039
M346T348_1	346.178	347.863	6.93264	Asn-Gly-Arg	[M+H]+			Organic acids and derivatives	Carboxylic acids and derivatives	Amino acids, peptides, and analogues	348.788	18	7	3	8	17658	53973.8	27859.5	142543	51355.2	18200.7	13322.8	65022.7	49644.2	34721.3	94433.7	53789.4	85221.7	77903.3	58905.2	40570.2	70573.8	58677.1	60689.4	58687.8	0.0195225	0.0195225
M318T448	318.186	448.151	6.80469	Asn-Gly-Lys	[M+H]+			Organic acids and derivatives	Carboxylic acids and derivatives	Amino acids, peptides, and analogues	452.644	14	7	1	6	5158	9073.11	17378.4	15571.2	10032.2	28010.1	26082.9	10189.7	12627.8	26324.4	13155.5	9336.07	12964.6	12409.4	10059.1	21603.4	7263.68	13452.6	13781.7	13440.1	0.0142886	0.0142886
M374T323_1	374.23	322.618	6.84436	Asn-Ile-Lys	[M+H]+			Organic acids and derivatives	Carboxylic acids and derivatives	Amino acids, peptides, and analogues	329.054	14	6	2	4	11062	11759.4	19616.9	35064	27302.3	40287.1	45494.5	18436.2	4475.08	27524.9	20293.5	46632.3	20786.2	15377	21160.3	11244.3	28669.9	18005.4	19637.2	17570.4	0.0592061	0.0592061
M246T286_1	246.152	285.837	3.081	Asn-Leu	[M+H]+			Organic acids and derivatives	Carboxylic acids and derivatives	Amino acids, peptides, and analogues	288.732	19	10	1	8	15214	20427.5	34702.6	55583.3	26334.2	80277	55469.2	30354.8	33485	47478.3	31810.4	47816.1	34167	31235.3	24620.4	31595.9	21641.6	36009.5	36765.3	36794.5	0.0121857	0.0121857
M402T362_1	402.255	361.714	8.47572	Asn-Leu-Arg	[M+H]+			Organic acids and derivatives	Carboxylic acids and derivatives	Amino acids, peptides, and analogues	362.175	15	9	1	5	34265	19855.2	32196.3	46171.7	16044	156566	90133.9	14164.1	19945	102220	34660.3	44293	31989.9	45069.9	14607.6	12006.3	22162	32029.1	32031.3	31166.2	0.0157158	0.0157158
M261T436	261.164	436.226	4.89129	Asn-Lys	[M+H]+			Organic acids and derivatives	Carboxylic acids and derivatives	Amino acids, peptides, and analogues	440.105	20	8	3	9	26425	23033.6	32745.7	57393.4	26297.8	109981	49883	15657.9	48435.3	62722.2	21465.3	34806.1	28003.4	25414.9	17376.4	57317.7	16612.9	33256.1	33850.7	32746.2	0.0166077	0.0166077
M417T402	417.255	401.955	2.78207	Asn-Lys-Arg	[M+H]+			Organic acids and derivatives	Carboxylic acids and derivatives	Amino acids, peptides, and analogues	406.11	18	9	1	6	19875	40910.9	58537.5	135115	72681.8	62442.1	163930	53946	31897	46281.1	67562.6	56504	51652.1	67968.2	28562.9	58389.1	41374	56586.7	58314	56613.5	0.0173095	0.0173095
M358T367_1	358.209	367.218	6.59513	Asn-Pro-Lys	[M+H]+			Organic acids and derivatives	Carboxylic acids and derivatives	Amino acids, peptides, and analogues	367.997	16	9	1	6	6466	24357.6	17645	23463.6	26302.3	30081.3	46185.1	16684.8	12937	37308	28852.5	17239	18288.3	20256.9	15559.9	18058.1	15067.1	18912	17827.2	18909.8	0.0337285	0.0337285
M362T420	362.182	419.829	7.74514	Asn-Thr-Lys	[M+H]+			Organic acids and derivatives	Carboxylic acids and derivatives	Amino acids, peptides, and analogues	420.853	14	6	1	6	6115	13789.7	12745.3	32489.7	19659.7	11229.4	18246.7	16481.9	10107.9	18422.9	25490.7	19341.6	21467.5	19141.9	15325.4	15008.4	22687.8	16511.5	16370.3	16553.9	0.00583458	0.00583458
M360T403_1	360.232	403.081	9.1588	Asn-Val-Lys	[M+H]+			Organic acids and derivatives	Carboxylic acids and derivatives	Amino acids, peptides, and analogues	414.855	18	10	1	7	19315	23735.6	46495.7	49320.6	30384	94657	75332.7	32718.8	32280.8	120977	27929.9	25504.4	36376.7	30336	17079.4	35653.2	22256.6	56114.9	47450	56122.2	0.0940236	0.0940236
M361T435	361.194	434.872	1.93407	Asp-Ala-Arg	[M+H]+			Organic acids and derivatives	Carboxylic acids and derivatives	Amino acids, peptides, and analogues	440.105	12	5	1	6	9924	12321.6	19798.6	31249.9	26256.5	15245.8	33247.6	16393.1	11898.3	26218.3	29646.2	16914.8	24058.5	21145.4	16111.3	23627.4	14873	21933.8	22370.2	21932.8	0.0114238	0.0114238
M295T348	295.14	347.997	2.4604	Aspartame	[M+H]+		C11045				349.989	10	4	0	6	7242	31139.4	39183	45877	38331.7	77123.6	41055.1	35319.5	66687.7	89243.2	50637.7	39594.6	44369.9	39762.6	35376.4	42738.3	31391.2	28548.3	30860.7	30999.4	0.0456878	0.0456878
M371T244	371.258	243.589	8.45764	Aspidocarpine	[M+H]+						260.513	14	5	3	5	13618	13359.7	28380.7	31619.4	82225.1	42375.5	40706.5	18577.8	31830.4	76942.5	32764.8	18202.8	9565.37	7066.93	32783.9	7271.79	31885.2	15354.2	15959.9	15307.9	0.0234102	0.0234102
M459T191	459.261	191.463	1.18952	Astemizole	[M+H]+	HMDB0014775	C06832				200.586	15	8	1	5	8394	14341.7	28092.3	16252.6	16181.3	16526.9	18569.6	30209.2	40832.4	17986.7	29929.1	26004.6	25716.8	12945.7	14418	44210.1	6880.36	24415.8	22619.8	24403.7	0.0433964	0.0433964
M567T168	567.322	167.792	3.48872	Atglistatin	[2M+H]+			Benzenoids	Benzene and substituted derivatives	Biphenyls and derivatives	192.537	16	4	2	9	64887	27646.8	124688	4041.6	160692	13995.7	54674.9	194240	17843.4	110350	366414	13021.1	7097.64	79379.8	41724.5	5077.78	14555.4	109814	110458	109208	0.00568869	0.00568869
M559T345_1	559.274	344.954	7.6352	Atorvastatin	[M+H]+	HMDB0005006	C06834	Organoheterocyclic compounds	Pyrroles	Substituted pyrroles	361.708	14	7	1	6	2410	4414.78	13698.5	16198.5	10665.6	16394.8	21017.2	15682.5	14296.7	27374	22940.6	19134.8	15612.5	13736.9	11007.9	9648.3	13025.5	12499.4	12077.6	12516.9	0.0201176	0.0201176
M382T438	382.17	437.689	4.8179	Azelastine	[M+H]+	HMDB0015107	C07768	Organoheterocyclic compounds	Diazanaphthalenes	Benzodiazines	440.598	12	7	1	4	24079	15894.8	18071.5	93906.6	6822.83	18211.5	20448.3	17624.8	17379.6	22088.2	59371.1	10305.2	20406.8	67119.5	18579.8	16246.4	21042	27835.3	28138.7	27837.1	0.00625188	0.00625188
M387T468_1	387.186	468.267	2.11446	Baccatin iii	[M+H-C9H12O5]+		C11900	Lipids and lipid-like molecules	Prenol lipids	Diterpenoids	471.756	13	8	1	4	10260	7847.04	5994.53	73174.2	11097.8	7239.69	8581.07	18351.5	18858.8	11025.2	52367.9	21134.2	14977.4	38180.7	26342.7	22137.3	35227.3	21816.4	21174.2	21582.8	0.0151016	0.0151016
M105T338	104.995	338.154	4.35636	Bata-hydroxypyruvic acid	[M+H]+	HMDB0001352	C00168	Organic acids and derivatives	Hydroxy acids and derivatives	Beta hydroxy acids and derivatives	338.726	22	10	3	9	99993	435487	148691	220752	56332.6	80976	24900.3	202649	317618	31983.8	18776.3	283199	226188	89225.8	256728	217724	692931	201384	202767	201768	0.00353459	0.00353459
M409T37_2	409.178	36.9865	3.89041	Beclomethasone	[M+H]+	HMDB0013609	C06842	Lipids and lipid-like molecules	Steroids and steroid derivatives	Hydroxysteroids	37.642	14	5	2	7	134524	206744	221668	230746	254103	152487	148231	217581	215441	180365	197483	242470	199763	225225	188992	236309	208327	238200	230409	238194	0.019085	0.019085
M341T195	341.319	194.553	3.23713	Behenic acid	[M+H]+	HMDB0000944	C08281	Lipids and lipid-like molecules	Fatty Acyls	Fatty acids and conjugates	205.02	19	7	3	9	67880	29695	35059.7	30766.7	35466	40160.8	13288.1	38117.6	2009.01	1965.13	54519.4	32321.1	23901.8	49202.4	18896.4	164441	24633.5	32680.4	32643	31388.4	0.022811	0.022811
M348T234	348.172	234.132	8.24132	Benalaxyl	[M+Na]+		C10929	Organic acids and derivatives	Carboxylic acids and derivatives	Amino acids, peptides, and analogues	234.683	15	4	3	8	6661	9223.27	22209.3	18650.2	43778.4	8363.01	19402.7	13160.5	14267.9	23642	17047.3	16734.5	13693.9	15274.3	15898.2	8335.56	11274.8	14613.1	14600.1	13904.1	0.0282244	0.0282244
M304T125	304.312	124.929	1.83297	Benzalkonium chloride (c12)	[M]+		C06523	Benzenoids	Benzene and substituted derivatives	Phenylmethylamines	126.655	19	8	3	8	1955633	3.26544e+06	686982	267164	6.92178e+06	1.11666e+07	84783.6	1.29839e+06	1.18747e+06	1.34594e+06	839255	578679	745512	8.89118e+06	2.07499e+06	2.51177e+06	339732	3.10021e+06	3.10157e+06	3.1001e+06	0.000263606	0.000263606
M270T428	270.105	428.044	1.63406	Benzamide, 4-(acetylamino)-n-(2-aminophenyl)-	[M+H]+			Benzenoids	Benzene and substituted derivatives	Anilides	434.015	35	10	1	9	12923	14741.1	25502.8	37704.7	24706.9	13762.8	27856.4	9100.46	6656.08	40567.9	24288.1	9512.64	11950.6	25164	12763.5	8944.04	11167.2	17199	17449.4	17886.1	0.0198565	0.0198565
M464T289	464.257	289.01	1.78733	Benzamide, n-[5-[2-(3,5-dimethoxyphenyl)ethyl]-1h-pyrazol-3-yl]-4-[(3r,5s)-3,5-dimethyl-1-piperazinyl]-, rel-	[M+H]+			Organoheterocyclic compounds	Diazinanes	Piperazines	291.037	11	8	0	3	3608	4852.51	8138.68	14705	6428.31	21075.6	10150.9	10179.3	8379.82	19047.8	12220	22404.4	8105.16	7099.14	8425.35	6286.44	8406.75	8484.51	8939.07	8933.52	0.0296903	0.0296903
M386T312	386.101	311.99	6.66969	Benzoximate	[M+Na]+		C19021	Benzenoids	Benzene and substituted derivatives	Benzyloxycarbonyls	312.907	12	6	2	4	6414	8597.95	1086.65	9226.17	1756.31	19004.3	1542.68	4256.66	8196.97	3083.09	2226.83	3243.49	2921.82	9453.92	7376.07	7534.74	4795.03	3117.83	2503.23	2534.61	0.127323	0.127323
M335T369	335.106	369.135	3.51746	Benzyl butyl phthalate	[M+Na]+		C14211	Benzenoids	Benzene and substituted derivatives	Benzoic acids and derivatives	387.062	19	7	3	8	35388	65585	34761.6	142841	65294.9	300949	71216.8	11296.9	53489.3	48583.7	56236.7	96911	89819.4	32301.7	52885.2	64255.3	52838.5	83198.9	83378.5	91501.6	0.0551293	0.0551293
M491T38	491.387	37.6365	5.10185	.beta.-amyrin acetate	[M+Na]+			Lipids and lipid-like molecules	Prenol lipids	Triterpenoids	48.129	16	7	1	5	24881	63620.1	57215	89009.9	67600	38457.8	12413.5	88661.7	67667.5	17032	210428	24104.5	53944.6	81386.1	31465	78016.6	40491.3	68647.2	65399.4	68878	0.0287567	0.0287567
M552T138_3	552.442	138.458	2.89294	.beta.-cryptoxanthin	[M]+.		C08591	Lipids and lipid-like molecules	Prenol lipids	Tetraterpenoids	139.664	14	7	1	6	4264	11743.9	10847.9	16747.5	10071.6	5453.23	20396.1	15900.5	21129.3	21756.9	19848.5	10618.6	21112.7	16430.2	11535.8	8541.86	14299.1	12049.4	13390.5	12127.1	0.0601208	0.0601208
M193T101	193.165	101.048	0.223742	.beta.-damascone	[M+H]+	HMDB0032541		Organic oxygen compounds	Organooxygen compounds	Carbonyl compounds	103.307	19	7	3	9	14550	61970.6	102686	44450.3	32059.5	44071.3	66582.6	65909.3	85133.1	35187.5	37987.8	61955.1	56238.4	23243.8	52599.3	65911.2	71049.8	83975.7	74913.8	83923.8	0.0644566	0.0644566
M526T206	526.229	205.579	5.00731	.beta.-d-glucopyranosiduronic acid, 5-[3-[(2,2,3,3-tetramethylcyclopropyl)carbonyl]-1h-indol-1-yl]pentyl	[M+Na]+			Lipids and lipid-like molecules	Fatty Acyls	Fatty acyl glycosides	207.01	14	7	1	6	17291	26002.4	18121.5	19311.9	72659.8	15308.3	15365.8	92656.7	31301.2	33168	63226.1	29301.8	24246.3	27052.7	44664.6	73716	30305.1	32779.8	33994.3	32790.4	0.0210348	0.0210348
M463T34	463.297	34.048	1.34515	.beta.-ecdysone	[M+H-H2O]+	HMDB0030180	C02633	Lipids and lipid-like molecules	Steroids and steroid derivatives	Bile acids, alcohols and derivatives	51.57	16	6	3	6	14660	45264.4	51567.1	49859.5	40185.5	43247.3	64863.6	44571.8	41429.9	56576.3	112631	46134.1	73242.3	52739.5	30037.9	19283.7	61134.5	49614	47336.8	47341.7	0.0273055	0.0273055
M257T270_1	257.156	270.051	1.60353	Betaine	[2M+Na]+	HMDB0000043	C00719	Organic acids and derivatives	Carboxylic acids and derivatives	Amino acids, peptides, and analogues	271.357	19	10	1	8	914424	20814.3	14622.1	102658	74576.7	579293	14772.2	26754.6	70942.1	26026	40195.8	75502.1	71933.3	111838	59783.8	110023	15397.7	333374	369239	333950	0.0594529	0.0594529
M505T158	505.267	158.376	3.03348	Betamethasone dipropionate	[M+H]+			Lipids and lipid-like molecules	Steroids and steroid derivatives	Pregnane steroids	159.995	12	6	2	4	20605	18820.7	33134.8	14096.3	51550.8	8386.3	13651.9	29992.1	64182.5	30267.3	17314.3	14502.7	21994.4	10822.9	16345.5	31239.4	18550.8	23839.4	23858.1	22413.5	0.0354591	0.0354591
M355T103	355.274	102.965	8.40244	.beta.-muricholic acid	[M+H-3H2O]+	HMDB0000415	C17726	Lipids and lipid-like molecules	Steroids and steroid derivatives	Bile acids, alcohols and derivatives	105.685	12	6	0	6	100822	288108	564926	289623	158367	179299	132507	271562	524723	148863	242914	239493	397569	266394	142170	479019	168249	310105	312950	310130	0.00525742	0.00525742
M397T26_1	397.395	25.956	7.26562	.beta.-sitosterol	[M+H-H2O]+	HMDB0000852	C01753	Lipids and lipid-like molecules	Steroids and steroid derivatives	Stigmastanes and derivatives	35.023	19	7	1	8	126164	215696	336522	135130	201068	86097.1	91152.9	107882	25291.5	84867.8	122513	59818.8	259404	214054	81942.5	142773	95680.5	210686	200887	201126	0.027369	0.027369
M323T152_1	323.112	151.53	5.0279	Bifenazate	[M+Na]+		C18589	Benzenoids	Benzene and substituted derivatives	Biphenyls and derivatives	157.405	11	5	1	5	6130	20788.3	22668	42601	5664.42	10902.3	5544.32	28643.6	16761.8	10399.8	27205.3	18219.4	31596.7	71123.9	35312.6	11179.4	35081.2	27121.7	26246.4	27148.7	0.0191261	0.0191261
M373T432	373.207	431.677	0.625313	Biocytin	[M+H]+	HMDB0003134	C05552				433.309	12	6	1	5	8812	19034.9	17540.1	49412.6	18014.1	9986.66	26931.1	33530.5	23749.7	20842.3	46099.1	24625.9	26998.7	26181	29077.9	24697.4	31628.9	24590.2	22116.4	24586.3	0.0600532	0.0600532
M245T277	245.103	277.34	3.18982	Biotin	[M+H]+	HMDB0000030	C00120				278.956	15	8	1	6	8037	10517.8	16002.1	29274.1	14687.5	14770.5	31801.2	17243.3	11312	12431.3	25360.4	13790.6	14187.6	25258	22454.1	18946.2	10881.7	15688.7	15694.6	16293.4	0.0218625	0.0218625
M393T195_1	393.284	195.161	1.13653	Bis(2-ethylhexyl) adipate	[M+Na]+	HMDB0040270	C14240	Lipids and lipid-like molecules	Fatty Acyls	Fatty acid esters	195.881	16	8	1	7	21458	50320.2	111236	56178.2	54972.2	35562.8	101025	112181	64045.5	92755.2	39929.2	40399.2	53754.6	55512.9	68457.8	21713.4	43550.3	70490	69491.6	70654.7	0.0089639	0.0089639
M187T68_2	187.15	68.3325	5.73843	Bis-(acetyl)diaminopentane	[M+H]+			Organic acids and derivatives	Carboxylic acids and derivatives	Carboxylic acid derivatives	82.82	20	10	1	9	2249896	2.08909e+06	2.05772e+06	50114.6	4.4648e+06	633420	2.0334e+07	2.22432e+06	156114	1.82929e+06	229029	489228	1.38009e+06	182635	1.79076e+06	550575	506663	2.75219e+06	2.7522e+06	2.76664e+06	0.00302674	0.00302674
M413T473_1	413.174	472.769	7.80984	Bisindolylmaleimide i	[M+H]+		C11238	Organoheterocyclic compounds	Indoles and derivatives	N-alkylindoles	485.531	17	9	1	6	10506	5684.94	9575.07	12752.6	40699.9	4865.46	25238.1	21243.3	3268.38	20539.8	19184.4	6696.09	12170.3	14230.5	16199.8	14144.4	5863.93	10736.1	11600.4	10727.7	0.0454974	0.0454974
M348T360	348.224	359.772	1.14274	Bisoprolol	[M+Na]+	HMDB0014750	C06852	Benzenoids	Benzene and substituted derivatives	Benzylethers	360.634	12	6	1	5	4044	7193.97	14850.4	20077.9	6653.38	15749.6	27398.4	18349	10324.5	21059.9	16121.8	11662	10999.7	13107.8	7773.31	6881.28	15539.5	12265.2	11175.5	12295.7	0.0535675	0.0535675
M413T244_1	413.089	244.223	9.89689	Bispyribac	[M+H-H2O]+		C10915	Organic oxygen compounds	Organooxygen compounds	Ethers	244.958	11	8	1	2	1866	1004.52	2419.2	5413.52	4063.92	4088.57	4844.57	4011.33	1472.28	2578.27	2543.95	2210.85	1988.53	2185.67	2828.9	4307.24	3131.24	3098.5	2845.43	3123.75	0.0509234	0.0509234
M408T116_1	408.285	115.678	6.74357	Borrelidin	[M+H-CH6O4]+		C15687				117.595	11	6	1	4	93727	157039	527013	54371.4	67676.1	155317	28215.9	61429.2	1.19533e+06	51880	102673	46381.7	20718.1	82959.8	23851.5	1.2181e+06	66595.3	205360	116585	198841	0.28503	0.28503
M416T32_2	416.377	31.772	8.51343	Brassicasterol	[M+NH4]+		C08813	Lipids and lipid-like molecules	Steroids and steroid derivatives	Ergostane steroids	31.938	17	8	1	8	90890	141790	220519	157752	95623.6	114503	190124	219374	209204	175608	150530	195918	210631	178749	212925	126273	149321	162284	162282	161632	0.0023212	0.0023212
M561T151	561.328	150.816	9.97879	Brefeldin a	[2M+H]+						157.389	14	8	1	4	5284	12717.2	20661.2	14769.7	18447	13202.3	6664.12	19440	18499.7	20765.2	24592.7	31339.1	14421.9	28408.7	21409.8	14933.1	23070.7	17454.4	18484.8	17458.8	0.033352	0.033352
M387T267	387.25	266.871	8.66437	Bufalin	[M+H]+		C16922	Lipids and lipid-like molecules	Steroids and steroid derivatives	Steroid lactones	268.691	11	5	1	5	42194	24882.5	41335.2	148822	36121.5	124208	52124.7	23477.5	120502	65611.4	46964.3	23805.5	120814	124353	26051.7	55160.3	17054.2	45930.6	40105.8	45817.3	0.075782	0.075782
M445T185	445.275	185.166	0.0513603	Bufotalin	[M+H]+		C16923	Lipids and lipid-like molecules	Steroids and steroid derivatives	Steroid lactones	212.481	13	5	2	5	12032	11539.8	17026.6	6080.76	15855.2	25067.2	21734	21212.2	8144.29	14564.4	9833.95	42775.1	7171.34	10052.8	20219.9	33946.3	12431.5	12119.9	13992.5	13917	0.0794429	0.0794429
M402T353	402.114	352.885	8.3527	Butachlor esa	[M-H+2Na]+			Benzenoids	Benzene and substituted derivatives	Anilides	363.421	13	5	1	6	5612	52262.2	20618	49369.5	35358.4	28194.5	60693.5	52506.7	43534.8	62289	55294.2	34922.3	38922.1	33216.4	26302.5	78865.2	32221.8	39225.6	42018.7	39277.4	0.0397729	0.0397729
M362T57	362.339	57.0165	6.28027	C-6 ceramide	[M+H-2H2O]+			Lipids and lipid-like molecules	Sphingolipids	Ceramides	58.703	32	7	3	8	13638	71226.5	65615.2	16023.7	72249	53663.8	13460.8	67586.7	64730.9	48797.9	87560.6	57676.2	64867.3	59924.3	63048.2	70200	47107.2	63786.7	62791	62799.5	0.00906811	0.00906811
M299T223	299.191	223.493	9.69276	Cafestol	[M+H-H2O]+	HMDB0035710	C09066				232.192	19	10	1	8	13502	18218.2	31914.5	4506.34	58762.4	17003.6	39211.5	30058.3	21840.8	65819.5	10710.6	21902	35659.6	20499.5	28830.5	11530.9	13716.7	23459.7	25013.2	23453	0.0374913	0.0374913
M524T195_2	524.295	195.183	5.5544	Calcimycin	[M+H]+		C11309				195.766	12	3	2	7	15416	20688.8	28066.5	17165.6	19849.6	11365.1	20421.9	23180.8	36445.4	31030.8	33288.1	19361.7	24651	17388.5	24486.5	40757.4	14033.3	20062.9	20918.4	20068.8	0.0241875	0.0241875
M311T242	311.192	241.845	1.99143	Cannabinol	[M+H]+		C07580	Organoheterocyclic compounds	Benzopyrans	1-benzopyrans	246.299	11	5	1	5	30365	23195.4	56121.3	55042.5	88715.7	21694.4	37522.8	24670.2	25578.7	112836	61544.5	23189.6	8594.81	35541	42044.6	22944.6	47092.1	32421.3	30308.2	32450.7	0.0387228	0.0387228
M382T65_1	382.163	65.1845	8.44008	Capecitabine	[M+Na]+	HMDB0015233	C12650				67.434	16	9	1	6	14124	46114.7	65226.7	21434.8	36622	11312.5	41824.3	42644	104305	58185.1	86509.8	57543.2	87811.3	31212.4	38883.3	60028.6	68184.7	61208.1	69747.2	61283.7	0.076598	0.076598
M425T202_2	425.265	201.657	3.3059	Caperatic acid	[M+Na]+			Organic acids and derivatives	Carboxylic acids and derivatives	Tricarboxylic acids and derivatives	203.061	14	7	1	6	9830	25279.4	35877.2	29337.2	38951.9	51994.1	51417.2	40934.2	35403	73755.5	26657.3	20796.5	45867.4	21076.8	30932.4	21562.8	29061.8	39439	39928.4	39443.3	0.00710301	0.00710301
M593T282	593.348	282.116	6.58339	Carbenoxolone	[M+Na]+			Lipids and lipid-like molecules	Prenol lipids	Triterpenoids	282.747	12	7	1	4	162497	82736	85597.8	265547	319426	427391	152533	369117	138976	810911	701330	49211.1	152878	149654	238181	218605	133119	248264	259013	248437	0.0244402	0.0244402
M362T375	362.175	374.786	8.06159	Carbobenzyloxyglycylglycyl-l-norleucine	[M+H-H2O]+			Organic acids and derivatives	Carboxylic acids and derivatives	Amino acids, peptides, and analogues	387.312	16	5	3	7	7693	31855	14989.4	77638.5	39850.2	8270.55	26946.4	30270.8	25536.7	22082.2	49717.8	34174.4	38287.6	47796.9	20843.3	19580.9	45922.5	32275.8	32275.9	32851.5	0.0102371	0.0102371
M162T348	162.118	348.231	2.12828	Carnitine	[M+H]+	HMDB0000062	C00318	Organic nitrogen compounds	Organonitrogen compounds	Quaternary ammonium salts	348.816	22	10	3	9	2534176	1.31283e+06	181390	560817	7.55269e+06	1.37014e+06	310619	467355	430892	133457	1.34537e+06	136587	279892	178508	175283	838853	180877	1.18075e+07	1.1805e+07	1.15249e+07	0.0138701	0.0138701
M407T231_1	407.204	230.805	1.76716	Carvedilol	[M+H]+	HMDB0015267	C06875	Organoheterocyclic compounds	Indoles and derivatives	Carbazoles	233.238	15	9	2	3	22233	66823.3	86493.8	41183.4	88869	101527	126442	110421	58447.2	108055	36790.9	114692	81392.9	36185	56334.6	137081	35935.7	66338.5	64941.2	42500.2	0.230946	0.230946
M203T33_1	203.185	33.071	8.9962	(-)-caryophyllene oxide	[M+H-H2O]+		C16908	Lipids and lipid-like molecules	Prenol lipids	Sesquiterpenoids	36.329	19	10	1	8	54921	119942	105731	104765	173965	125074	96944.1	212735	103021	75108.6	340115	99185.9	168087	129215	89976.7	99715.2	195805	135516	134318	134338	0.00509055	0.00509055
M435T39	435.337	39.271	3.71841	Caulophyllogenin	[M+H-3H2O]+			Lipids and lipid-like molecules	Prenol lipids	Triterpenoids	48.621	16	8	1	6	96744	66905.5	106111	155427	833023	115712	47496.4	244226	40135.1	53600.3	1.07126e+06	67118.1	150349	37448.6	56474.1	350255	145005	207659	220058	207439	0.0341159	0.0341159
M551T33_3	551.437	33.0695	4.45759	Celaxanthin	[M+H]+			Lipids and lipid-like molecules	Prenol lipids	Tetraterpenoids	33.076	12	7	1	4	620067	58043.3	17495.2	113903	42836.7	31564.4	66090.4	27119.5	57784.6	41167.4	63817.7	46455.9	109214	113294	39958.3	44729.8	59924	50471.4	73092.2	45073.9	0.264448	0.264448
M467T198_1	467.301	197.841	1.11364	Cephaeline	[M+H]+		C09390				200.981	13	8	1	3	10573	22933	31521.6	12750.1	22246.1	38080.9	28366.4	35600.3	36928.5	14225.8	25626.8	24910.8	20116.5	19026.6	15778.5	47962.3	16864.4	26119.9	27015.2	27013.6	0.0193318	0.0193318
M316T322	316.165	321.656	9.08185	Cephalotaxine	[M+H]+		C10580				326.02	14	7	1	6	3742	7957.63	7472.77	15930.2	7572.78	7692.71	9835.4	9522.27	6599.36	9684.72	13057.9	11450.6	11252.7	14205.5	8868.28	8754.46	12608.2	10831.3	10572.2	10578.1	0.0138751	0.0138751
M298T73	298.282	73.449	6.32378	Chaulmoogric acid	[M+NH4]+		C08282	Lipids and lipid-like molecules	Fatty Acyls	Fatty acids and conjugates	76.213	32	10	2	9	40163	214000	400293	67709.9	105952	122778	368407	204561	336711	203693	89208.7	118213	105896	105455	129355	254641	85359.4	285999	279363	270581	0.0277537	0.0277537
M357T54	357.291	54.09	2.64878	Chenodeoxycholate	[M+H-2H2O]+	HMDB0000518	C02528	Lipids and lipid-like molecules	Steroids and steroid derivatives	Bile acids, alcohols and derivatives	56.251	16	6	3	7	205470	1.0199e+06	2.00479e+06	815828	936429	156654	243084	1.21658e+06	1.92077e+06	370133	621758	1.72456e+06	848728	412703	232053	1.24649e+06	499703	1.02552e+06	893634	895692	0.0805288	0.0805288
M341T385	341.145	384.628	2.04194	Chitobiose	[M+H]+	HMDB0003556	C01674	Organic oxygen compounds	Organooxygen compounds	Carbohydrates and carbohydrate conjugates	386.357	12	6	1	5	14107	10308	77700.5	15955.7	15396.6	27571	31539.8	26067	40056.9	34192.6	36027.5	36695.1	4069.82	30286.8	21819	14791.3	32258.7	30822.3	26821.8	30878.1	0.078826	0.078826
M545T157_1	545.242	157.368	8.43343	Chloramphenicol palmitate	[M+H-H2O+2i]+		C11726	Benzenoids	Benzene and substituted derivatives	Nitrobenzenes	159.319	12	7	1	4	17019	20470.3	29926.8	14178.6	108403	6445.85	22323	26051.6	40976.8	30159	33072.8	12987.4	15301.7	17843.2	19492.8	20305.9	10126.3	29017.8	31810.7	29019.4	0.0538257	0.0538257
M490T317	490.174	316.56	5.77273	Chlorhexidine	[M+H-NH3+2i]+	HMDB0015016	C06902	Benzenoids	Benzene and substituted derivatives	Halobenzenes	328.216	15	6	1	5	3249	19101.4	11350.2	20658.9	52658.2	10852.3	15733.9	18334.4	19725.3	34362	18668.9	14710.4	17890.6	28289.4	15566.6	16903.8	10475.6	18963.2	20836	18984.5	0.0548725	0.0548725
M427T296_4	427.17	295.988	4.5979	Chlormadinone acetate	[M+Na]+		C12729	Lipids and lipid-like molecules	Steroids and steroid derivatives	Pregnane steroids	296.756	16	8	1	7	6345	8482.44	11686.5	18894.6	9273.1	13482.2	19525.2	19110.9	15332.3	16627.6	19710.8	10563.2	17893.1	14592	19413.6	10429.1	14281.3	14245.2	14570.3	14249.4	0.0129924	0.0129924
M320T406	320.198	406.044	6.42777	Chloroquine	[M+H]+	HMDB0014746	C07625	Organoheterocyclic compounds	Quinolines and derivatives	Aminoquinolines and derivatives	407.742	11	6	1	4	13035	9970.23	11456.5	22657.2	12068.3	68993.6	16744.3	19395	6094.12	18968.8	22904.8	8002.8	15654.4	18216.3	10583.1	23237.1	16358.2	15088.8	16163.5	16199.6	0.0399026	0.0399026
M425T218_1	425.348	217.532	3.12394	Cholest-5-ene-3.beta.,4.beta.-diol	[M+Na]+	HMDB0013643		Lipids and lipid-like molecules	Steroids and steroid derivatives	Cholestane steroids	218.905	15	6	1	8	2363	7633.8	11843.6	3936.83	9213.69	15721.3	11777.9	13457.7	14841.2	9360.9	17115.5	7150.5	12280.7	4013.85	8627.12	8433.52	851.512	12229	11098.9	12224.9	0.054959	0.054959
M104T147	104.11	147.088	5.16767	Choline	[M]+	HMDB0000097	C00114	Organic nitrogen compounds	Organonitrogen compounds	Quaternary ammonium salts	148.674	13	5	3	5	28208	12115.4	3695.24	9784.6	26422	125396	28476.6	9028.36	37603.7	9246.83	12939.8	18510.9	11381.9	55577.6	13877.4	13300.2	21408.8	18358.8	18345.3	18298.2	0.00173422	0.00173422
M253T49	253.126	49.406	2.26493	Cimetidine	[M+H]+	HMDB0014644	C06952	Organoheterocyclic compounds	Azoles	Imidazoles	72.473	18	10	1	4	11756	21402.8	47759.1	25297.5	30259	14726.4	29044.1	58608.4	22002.5	23693.2	25387	27382.7	58033.1	24405.7	22376.1	17929.3	29732.5	31070.8	31073.2	32285.4	0.0222573	0.0222573
M617T278_1	617.349	278.373	0.209935	Cimicifugoside h 2	[M+H-H2O]+			Lipids and lipid-like molecules	Steroids and steroid derivatives	Cycloartanols and derivatives	279.961	11	6	1	4	103792	27925.9	37234.2	169435	180650	16771.6	98289.7	94968.5	37922.7	395066	285781	20809.2	99921.9	46037	128130	92604.9	46318.1	94557.4	101289	94653.8	0.0398504	0.0398504
M307T327	307.109	327.295	4.7635	Cimifugin	[M+H]+		C09000	Organoheterocyclic compounds	Benzopyrans	1-benzopyrans	328.689	16	7	2	6	23850	5931.82	5806.14	15659.6	2657.54	72400.3	4721.37	5851.61	7914.42	7109.56	2774.2	7614.47	5435.91	3535.36	5888.03	7993.01	4263.93	7115.36	5802.55	5761.38	0.123685	0.123685
M295T408	295.175	407.754	8.73116	Cinchonine	[M+H]+	HMDB0030282	C06528				409.079	20	8	3	9	252815	311670	62357.8	859232	369485	66193.8	59432.6	469709	343410	62990.3	618496	330816	484876	576187	413559	249848	589882	363394	357863	363402	0.00883783	0.00883783
M293T33	293.294	33.073	2.14192	Cis-13-eicosenoic acid	[M+H-H2O]+	HMDB0035159		Lipids and lipid-like molecules	Fatty Acyls	Fatty acids and conjugates	33.742	20	9	3	8	110530	107992	106991	172050	127984	103884	184225	82110.3	189259	110716	75760.6	154806	121470	86341.8	113119	110832	73280.6	96145.2	92862.2	92914.6	0.0200107	0.0200107
M280T415	280.164	414.501	3.67785	Cis-2-tert-butoxycarbonylamino-2-methylcyclohexanecarboxylic acid	[M+Na]+			Organic acids and derivatives	Carboxylic acids and derivatives	Carboxylic acids	422.444	21	8	3	8	22726	26367.9	8006.31	39955.4	34310.2	3347.11	4770.01	36881.3	17310.1	10562.9	33212	28925.3	30376	38647.4	34155.8	16728.6	43860.7	40640.8	30162.9	30350.4	0.177829	0.177829
M333T161_2	333.276	160.582	2.55508	Cis-4,10,13,16-docosatetraenoic acid	[M+H]+			Lipids and lipid-like molecules	Fatty Acyls	Fatty acids and conjugates	163.194	14	5	3	6	13490	29150.2	63893.3	7843.43	29403.9	21474	75118.9	17752.3	35239.9	68533.2	14653.5	20372.6	23886.3	11494.6	25849.8	11992.8	12897.8	30372	30371.5	29879.2	0.00941481	0.00941481
M509T36_1	509.468	36.33	7.01454	Cis-9-palmitoleic acid	[2M+H]+	HMDB0003229	C08362	Lipids and lipid-like molecules	Fatty Acyls	Fatty acids and conjugates	48.062	13	7	1	4	105004	126210	94785.2	251022	154302	25015	59196.6	73977.8	25780.8	34673.6	212917	33569.3	127852	141975	123906	92107.3	109471	122766	113909	113994	0.0435377	0.0435377
M466T310	466.169	310.381	9.0689	Cisapride	[M+H]+		C06910	Benzenoids	Phenol ethers	Aminophenyl ethers	311.985	13	9	1	3	5461	30448.7	28925.8	14288.8	18661.4	34144.4	18358.9	28028	17714.1	16337.7	15060.8	41794.6	18506.7	18536	11496.8	4262.33	26091.3	19877.6	19877.7	19770.9	0.00310573	0.00310573
M294T35_2	294.285	35.031	6.65379	Cis-hydroxyperhexiline	[M+H]+			Organic oxygen compounds	Organooxygen compounds	Alcohols and polyols	35.683	15	9	1	5	344856	207074	502612	145497	109050	113335	65355	244662	430021	164179	64233.1	125509	300186	163287	122602	151167	177714	231155	217790	231468	0.0344283	0.0344283
M265T57	265.26	57.142	8.90816	Cis-vaccenic acid	[M+H-H2O]+	HMDB0240219	C21944	Lipids and lipid-like molecules	Fatty Acyls	Fatty acids and conjugates	58.088	21	8	2	9	137509	520076	882741	556925	316764	320798	413540	1.52004e+06	1.02194e+06	180227	490935	1.10133e+06	784632	371002	780986	438003	719191	735050	580822	736208	0.130667	0.130667
M206T253	206.11	252.96	1.28558	Clethodim	[M+H-C5H11ClOS]+		C18609	Organic oxygen compounds	Organooxygen compounds	Carbonyl compounds	263.717	17	8	1	8	2413	7115	12394.8	9106.21	5090.66	4847.77	10284.2	6516.17	5316.24	9641.21	7127.66	5408.71	4039.72	8439.07	7977.21	7618.49	9026.52	8890.76	8799.84	9291.13	0.0290624	0.0290624
M425T395	425.184	395.154	8.16659	Clindamycin	[M+H]+	HMDB0015321	C06914	Organic acids and derivatives	Carboxylic acids and derivatives	Amino acids, peptides, and analogues	405.756	15	7	3	5	6478	12223.9	19841.3	13783.7	12005.1	15214.4	18218.8	2814.32	9358.69	17964	10889.4	26007	14422.7	7577.63	10340.2	9567.65	26162.8	14728.8	15281.7	15283.5	0.0211768	0.0211768
M401T287_1	401.145	287.2	6.97216	Cnicin	[M+Na]+		C09362	Lipids and lipid-like molecules	Prenol lipids	Terpene lactones	291.372	13	7	1	4	4341	20329.5	24100.4	15987.7	24378.7	25740	33822.2	18308.3	47875.5	25098.1	27401.2	26706.2	25997.7	15217.2	24745.3	16216.5	19682.3	21561.6	22517.2	21578.4	0.0249909	0.0249909
M319T409_2	319.172	409.446	0.616838	Coenzyme q2	[M+H]+	HMDB0006709	C00399	Lipids and lipid-like molecules	Prenol lipids	Quinone and hydroquinone lipids	434.628	29	9	3	8	71374	10439.3	17151.8	90505.5	35853.2	584538	14140	53297.8	32485.6	8246.74	64344	49079.3	54051.9	57834.6	46108.6	37946.4	6627.48	48894.4	40636.9	40549.3	0.110538	0.110538
M386T210	386.184	209.925	5.90801	Colchiceine	[M+H]+			Hydrocarbon derivatives	Tropones	Tropolones	222.481	12	6	0	6	1682	11117.9	15776.4	10785.5	7828.83	9672.97	12194.6	9300.36	4918.64	12904.6	12750.7	5123.62	9256.42	13440	2692.06	12227.2	10222.8	14107.9	14878.8	14104.6	0.0310529	0.0310529
M422T427	422.173	426.644	2.2079	Colchicine	[M+Na]+	HMDB0015466	C07592				445.888	12	6	1	5	2431	20469.6	2162.96	25671.9	12746.3	4149.23	18312.8	14965.4	21188.6	21483.8	20002.8	5441.99	2730.38	25533.2	11059.8	5972.03	13064.9	15476	13901.1	15440.8	0.0601958	0.0601958
M655T419	655.289	419.121	6.22998	Coproporphyrin I	[M+H]+	HMDB0000643	C05769	Organoheterocyclic compounds	Tetrapyrroles and derivatives	Porphyrins	422.405	12	9	1	2	24624	13602.8	23906.5	60521.6	66446.4	13613.4	37481.5	67949.9	7303.12	53290.1	102904	12178.5	39146.8	30050.7	32671	45974.2	11629	30622.8	33615.3	33712.7	0.0537969	0.0537969
M251T285	251.146	285.091	3.65167	Corey pg-lactone diol	[M+H-H2O]+	HMDB0240213		Lipids and lipid-like molecules	Fatty Acyls	Fatty alcohols	296.756	21	10	2	8	11697	38376.4	23482.4	90852	61041.3	30800.5	62833.3	41015.5	39326	48642	41535	31660.7	40991.4	34761.9	25934.5	31179.7	43450.8	23043.9	31770.3	32545.3	0.181188	0.181188
M455T39_2	455.362	38.953	2.15604	Corosolic acid	[M+H-H2O]+			Lipids and lipid-like molecules	Prenol lipids	Triterpenoids	54.072	20	9	1	6	98454	260563	173262	181489	434183	428142	198448	389226	93007.4	84442.1	1.099e+06	132438	288555	213826	167476	344185	268251	280996	272063	281365	0.0189363	0.0189363
M187T34	187.153	33.7865	8.22282	Costunolide	[M+H-CH2O2]+		C09382	Lipids and lipid-like molecules	Prenol lipids	Terpene lactones	51.382	16	8	2	6	31546	43970.5	62059.9	74252.3	275925	70726.3	70180.5	123498	68574.4	59760.9	403953	78209	79803.7	62046.7	47984.4	161469	56720.2	83724.1	82829.3	91636	0.0563184	0.0563184
M132T345_2	132.081	344.946	4.83768	Creatine	[M+H]+	HMDB0000064	C00300	Organic acids and derivatives	Carboxylic acids and derivatives	Amino acids, peptides, and analogues	353.647	23	9	3	9	862391	95545	232472	599420	496258	1.35038e+06	110798	459064	386400	66628.6	343796	33288.1	153610	364171	53696.8	1.69007e+06	20731.7	2.37014e+06	2.47724e+06	2.37238e+06	0.0254277	0.0254277
M114T169_2	114.07	169.147	9.04413	Creatinine	[M+H]+	HMDB0000562	C00791	Organic acids and derivatives	Carboxylic acids and derivatives	Amino acids, peptides, and analogues	169.816	22	10	3	9	2404553	7.83273e+06	1.17842e+06	7.50031e+06	6.808e+06	1.15823e+07	501287	786362	1.60735e+06	446410	71957.8	233721	53285.8	8.12861e+06	435630	6.0274e+06	280508	4.50277e+06	4.48846e+06	4.50276e+06	0.00183657	0.00183657
M550T180	550.433	179.586	0.87765	Crocoxanthin	[M]+			Lipids and lipid-like molecules	Prenol lipids	Triterpenoids	187.553	12	3	2	7	49648	43146.4	46220.2	44447.1	32177	9743.44	26325.2	28824.9	28055.5	61354.8	23517.9	21255.3	93807.2	25772.4	19099.6	2683.82	9773.89	29351.2	31968	29334.4	0.0501574	0.0501574
M583T22	583.17	22.372	9.60519	Crufomate	[2M+H]+		C18972	Benzenoids	Benzene and substituted derivatives	Phenylpropanes	23.273	11	6	1	4	20464	1372.69	337.485	163.733	1704.09	440.606	241.938	777.522	1495.22	432.281	935.958	351.186	1022.29	1338.86	1147.69	505.497	666.356	3218.91	3285.47	3285.53	0.0117811	0.0117811
M539T229	539.311	228.865	0.674947	Cucurbitacin d	[M+Na]+		C08796	Lipids and lipid-like molecules	Steroids and steroid derivatives	Cucurbitacins	230.639	13	7	1	5	15134	8958.58	5335.91	8823.44	22428.6	8704.06	7509.34	8370.77	8636.15	11165.8	77890.3	3742	15021.6	8644.79	14504.2	18761.7	6023.91	10691.2	11435.8	10664.3	0.0400594	0.0400594
M537T182_1	537.262	182.375	0.652736	Cucurbitacin i	[M+Na]+		C08800	Lipids and lipid-like molecules	Steroids and steroid derivatives	Cucurbitacins	183.525	12	9	1	2	30357	13022.5	60203.3	88566.3	44970	11750.1	36042.2	85155.4	9251.55	24136.8	171994	5744.73	20604.5	30554.4	22379.3	48308	4480.03	39090.1	40002.9	38952.6	0.0145075	0.0145075
M485T286	485.286	286.077	1.45321	Cyasterone	[M+H-2H2O]+		C08816	Lipids and lipid-like molecules	Prenol lipids	Triterpenoids	288.732	14	8	1	5	16407	14074.9	15924	36103.2	33939.4	11580.5	17218.3	48483.2	14927.5	47066.1	138798	24709.2	15603.7	33688.1	26006.8	24981.6	16341	26193.3	26193.2	25859.9	0.00737877	0.00737877
M542T435	542.083	434.65	2.97942	Cyclic adenosine diphosphate ribose	[M+H]+		C13050	Organic oxygen compounds	Organooxygen compounds	Carbohydrates and carbohydrate conjugates	438.085	15	7	1	7	2207	4239.11	6627.92	3005.85	9230.38	1728.04	3807.35	9421.11	4673.17	5555.1	6633.96	10428.4	7190.5	4698.34	11535.4	5472.87	6971.67	5904	6414.31	6432.93	0.0480202	0.0480202
M583T219_1	583.317	219.186	6.25557	Cyclobenzaprine n-oxide	[2M+H]+						220.561	11	4	1	6	11952	7812.41	6051.38	17844.2	11778	9814.03	16415.9	21759.6	6444.86	10520.6	48821.9	9151.64	9209.3	10474	20896.5	11634.4	9855.95	14395.9	14787.4	14378.2	0.0159307	0.0159307
M264T353	264.166	352.841	3.79847	Cycloheximide	[M+H-H2O]+		C06685	Organoheterocyclic compounds	Pyridines and derivatives	Hydropyridines	363.943	16	8	2	6	4435	8508.25	17159	25834.9	11446.5	12280.5	22914.9	14153.2	7515.83	23653.4	14099.9	4103.13	8920.24	14474.5	4826.12	6394.87	15823.9	11825.7	12964.1	13054.6	0.0542913	0.0542913
M274T240	274.186	239.623	7.04555	Cyclopentolate	[M+H-H2O]+	HMDB0015114	C06932				240.632	14	6	2	6	4611	2381.35	4638.88	13101.7	5717.58	7397.17	10818.8	6532.13	11371.9	11362.1	6484.69	3560.64	15981.6	5553.67	4144.52	3303.72	9848	6201.24	5363.61	5372.67	0.0851979	0.0851979
M337T264_1	337.156	264.293	4.82	Cyclopiazonic acid	[M+H]+		C03032	Organoheterocyclic compounds	Indoles and derivatives	Indoles	265.557	18	10	1	7	27515	29143.2	45381.5	105048	71746.1	30896.6	33106	57391.2	48665.2	49396.7	59255.9	55086.2	54776.7	55706	52751.9	37720.5	58480.8	51273.9	57219.8	51181.9	0.0650016	0.0650016
M571T232_1	571.292	232.314	6.31281	Cymarin	[M+Na]+		C08859	Lipids and lipid-like molecules	Steroids and steroid derivatives	Steroid lactones	250.104	13	6	1	6	8783	9138.4	26698.8	9106.48	14297.5	4461.82	22165.4	20878.5	15165.8	15363.4	9309.49	28856	18410.4	7347.78	12115.7	19435.1	6645.13	12274.6	12271	11742.2	0.0253256	0.0253256
M167T292	167.121	291.524	9.91249	Cyromazine	[M+H]+	HMDB0029862	C14147	Organoheterocyclic compounds	Triazines	Aminotriazines	292.171	18	8	3	7	31024	24528.2	27729	6866.23	37101	24794.3	176427	23877	8843.41	7800.73	8344.97	3660.66	30983.2	5179.58	11783.3	10667	3075.22	31221.2	31904.7	31211.1	0.0126419	0.0126419
M244T256	244.087	256.074	8.94634	Cytarabine	[M+H]+	HMDB0015122	C02961				257.978	23	10	3	9	93059	64766.2	489170	760010	97995.7	681165	445979	159319	275135	31881.8	127066	30202.2	116008	240048	44992.9	564328	27729.6	402200	400684	378472	0.0337329	0.0337329
M266T240_1	266.083	239.649	6.34117	Cytidine	[M+Na]+	HMDB0000089	C00475				241.048	22	10	3	9	75823	64515.3	148694	160634	92594.9	383489	57937.2	53721.1	83047.5	71260.8	64200.9	90048.2	80218.2	101761	57195.4	222785	24935	107745	108629	106939	0.00784305	0.00784305
M112T240	112.053	239.613	3.53731	Cytidine 3'-monophosphate	[M+H-C5H9O7P]+		C05822				240.53	17	8	3	6	28442	20355.8	52018.4	57851.6	23231	96782.5	24827.2	23232.6	27662.4	26845.9	25495.1	23796.9	23042.9	34237.6	16759.9	96156.9	11003.7	34783.6	36715.2	34784.9	0.0314676	0.0314676
M148T191	148.08	190.823	4.4842	Cytisine	[M+H-C2H5N]+		C10763	Alkaloids and derivatives	Lupin alkaloids	Cytisine and derivatives	193.042	13	6	3	4	6292	10462.3	4034	5553.01	9036.62	8214.67	3176.86	5850.92	2138.05	4172.98	28606.7	6614.28	4261.67	12475.7	7196.95	1243.91	7029.56	5527.82	5571.08	5503.4	0.00619351	0.00619351
M460T238	460.23	238.387	9.9386	Cytochalasin a	[M+H-H2O]+		C19953	Alkaloids and derivatives	Cytochalasans	Cytochalasins	255.378	14	8	1	4	15576	19706.3	9662.27	14108.2	23464.3	14037.6	11226.7	12021.2	11683.9	17893.6	10409.4	13885.3	11706.1	8488.45	14415.2	5055.65	9059.65	16965.3	16963.9	16856.2	0.00369768	0.00369768
M444T71	444.271	71.281	4.05275	Cytochalasin b	[M+H-2H2O]+		C19954	Alkaloids and derivatives	Cytochalasans	Cytochalasins	74.62	18	7	1	7	3715	18715.7	31106.7	23139.7	17991.8	22251.7	25539.7	10408.3	37832.6	21142.6	17831.4	12186.5	23279.5	21872.6	14054.3	8327	18291.3	21998.1	20835.8	22002.6	0.0311086	0.0311086
M518T422_1	518.234	421.823	6.0427	Cytochalasin e	[M+Na]+						425.765	11	7	1	3	6051	8223.06	6579.77	19216.8	17426.9	7430.92	8161.59	6623.17	6999.43	10526.9	15888.8	20134.9	8566.17	13124.9	9154.58	14392.6	8481.19	11564.8	13167.2	11606	0.0754176	0.0754176
M112T195_2	112.054	194.544	5.90771	Cytosine	[M+H]+	HMDB0000630	C00380	Organoheterocyclic compounds	Diazines	Pyrimidines and pyrimidine derivatives	195.642	20	9	3	8	331155	359166	537148	688733	201107	1.36584e+06	289732	113437	88439.9	322916	327038	132689	163015	768268	76766.5	218131	165348	306509	311801	306576	0.00984831	0.00984831
M255T44	255.073	44.1375	4.44153	Daidzein	[M+H]+	HMDB0003312	C10208	Phenylpropanoids and polyketides	Isoflavonoids	Isoflav-2-enes	44.933	22	10	3	9	1707119	701016	204406	177028	269656	814116	296835	428973	629554	48391.8	580501	493294	281920	473654	234826	133930	300323	993591	987806	994884	0.00379914	0.00379914
M332T418_1	332.086	418.027	9.40146	Damp	[M+H]+	HMDB0000905	C00360	Nucleosides, nucleotides, and analogues	Purine nucleotides	Purine deoxyribonucleotides	419.601	14	8	1	5	10193	24701.3	34855.6	31065.8	27154.4	26330.7	15878.9	26920.9	29075.9	18571.6	57620.8	14368.8	19159.2	26640.3	18414.3	69030.8	14211.3	24474.7	24046.1	24045.4	0.0102396	0.0102396
M488T315	488.158	315.443	5.89299	Dasatinib	[M+H]+	HMDB0015384		Benzenoids	Benzene and substituted derivatives	Anilides	331.204	20	8	1	6	3673	18317.1	19930.3	22572	40697.8	21446.7	45144.2	21865.3	23852.9	29841.2	22704	15379.5	11510.8	24576.8	29150.5	22555.2	14410.3	24632.1	26437.9	24586	0.0418798	0.0418798
M363T287_1	363.1	287.012	4.87966	Daunorubicin	[M+H-C6H15O4N]+	HMDB0014832	C01907				290.722	16	9	1	6	218154	29430.1	17272.8	68819.3	53072.2	73738.3	17537.7	11401.7	31837.2	10910.2	24797	28249.4	29494.8	15709.8	25806.5	75111.5	16187.9	76466.7	83565.6	76442.3	0.0520851	0.0520851
M385T280	385.23	280.228	2.73764	Dehydrocholic acid	[M+H-H2O]+		C13154	Lipids and lipid-like molecules	Steroids and steroid derivatives	Bile acids, alcohols and derivatives	282.705	19	10	1	7	37246	46536.7	82281.8	42781.3	90936.3	88506.8	232287	38452.6	76446	170060	53248	75315.8	49483.5	53606.5	56837.2	26663.6	28577.1	59488.5	64968.9	59463.1	0.0517313	0.0517313
M399T196	399.284	196.189	8.71241	.delta.-6 testosterone enanthate	[M+H]+			Lipids and lipid-like molecules	Steroids and steroid derivatives	Steroid esters	207.221	20	7	1	7	10795	38904.7	32159.4	28914.6	38156.9	16134	72847.5	21227.1	26799.4	60712.8	75753.6	15616.4	30417.1	17782.3	28874.6	11526.7	30783	27706.6	25300	27727.9	0.0518615	0.0518615
M419T220_1	419.303	220.108	8.7176	.delta.-tocotrienol	[M+Na]+		C14156	Lipids and lipid-like molecules	Prenol lipids	Quinone and hydroquinone lipids	221.254	19	6	1	8	12944	24279.6	68220.9	28184.2	26472.4	15826.2	43421.1	32718	32419.7	39974.4	14761.5	24099.9	30692.5	24493.7	32068.3	19247.4	26097.7	28996.4	28993.4	30263.4	0.0248943	0.0248943
M252T144	252.118	143.676	9.01006	Deoxyadenosine	[M+H]+	HMDB0000101	C00559	Nucleosides, nucleotides, and analogues	Purine nucleosides	Purine 2'-deoxyribonucleosides	144.794	21	8	3	9	2036811	6.73733e+06	4.46065e+06	6.12582e+06	6.62429e+06	5.58444e+06	8.46729e+06	2.3568e+06	4.15151e+06	2.13644e+06	1.29784e+07	8.31387e+06	2.87576e+06	6.90619e+06	2.87656e+06	3.13343e+06	6.81229e+06	5.21796e+06	5.21795e+06	5.20852e+06	0.00104376	0.00104376
M290T230_1	290.094	230.425	2.23234	Deoxyguanosine	[M+Na]+	HMDB0000085	C00330	Nucleosides, nucleotides, and analogues	Purine nucleosides	Purine 2'-deoxyribonucleosides	231.299	19	10	1	8	219180	216208	290636	382648	262287	209935	278638	115410	371711	128811	371602	181904	187575	308922	134179	541530	179261	300304	304696	300261	0.00844558	0.00844558
M362T142	362.255	142.431	8.94176	D-erythro-sphingosine-1-phosphate	[M+H-H2O]+	HMDB0000277	C06124	Lipids and lipid-like molecules	Sphingolipids	Phosphosphingolipids	144.794	14	6	2	6	6275	15650.1	39408.6	17389	21531.7	6798.78	12044.2	14766.1	59261.4	11961.3	11235.9	9880.81	28197.8	18460	22059.3	15508.7	9139.01	20963	17933.6	17867.4	0.0934643	0.0934643
M281T357	281.161	356.921	2.61149	Desferrioxamine	[M+2H]2+	HMDB0014884	C06940	Organic acids and derivatives	Carboxylic acids and derivatives	Carboxylic acid derivatives	361.541	12	4	2	6	12468	13147.7	20019.2	23820	19605.2	23550.6	48550.5	18385.2	20622.2	27328.6	22030.9	12619.3	14366.8	19831.4	13995.6	13199.3	31847.7	17953.4	18730.3	18731.8	0.0243064	0.0243064
M311T52	311.229	51.908	3.75485	Desogestrel	[M+H]+	HMDB0014449	C07629	Lipids and lipid-like molecules	Steroids and steroid derivatives	Estrane steroids	54.671	19	8	1	5	23015	199422	86861.5	46521.2	65552.3	86441.6	43760.1	126447	180579	51870.2	97109.8	220058	166932	10930.2	119012	228916	88821.3	124555	129026	124534	0.020527	0.020527
M429T246	429.277	246.368	0.214938	Dethiobiotin	[2M+H]+	HMDB0003581	C01909	Lipids and lipid-like molecules	Fatty Acyls	Fatty acids and conjugates	247.73	12	6	1	5	3008	5553.92	10742.1	21599.6	12129.8	16584.1	9856.19	21847	18315.1	5779.11	8989.81	13007.7	19568.2	9244.9	13084.3	12426.5	6758.5	13820.4	11621.3	13819.9	0.0970068	0.0970068
M387T130	387.286	130.01	5.64967	Dexanabinol	[M+H]+			Organoheterocyclic compounds	Benzopyrans	1-benzopyrans	140.944	19	10	1	8	51537	56890.4	79894.1	124362	71453.9	25541.7	35370.2	118238	74583	155130	433499	245961	238665	141509	249595	38915.8	133325	134564	130502	134623	0.0177313	0.0177313
M206T71	206.145	71.4865	1.07197	Dexpanthenol	[M+H]+	HMDB0004231	C05944	Lipids and lipid-like molecules	Fatty Acyls	Fatty amides	73.641	22	10	3	9	7473	8944.13	7775.55	11976.8	3632.15	4778.15	6127.12	8593.32	22971.2	8001.59	9081.61	15657	4920.27	17317.8	37149.1	25051.7	22431.7	15072.7	14632.2	15063.4	0.0168643	0.0168643
M147T375	147.081	375.43	4.95779	D-glutamine	[M+H]+	HMDB0003423	C00064	Organic acids and derivatives	Carboxylic acids and derivatives	Amino acids, peptides, and analogues	376.068	22	10	3	9	21717	61636.2	58250.3	120937	46109.6	127224	85324.9	62689.2	61724.2	85774.5	40620.3	86759.2	82389.1	55352.1	51815.1	58111.7	40782.6	85555.9	85493.6	75854.5	0.0678386	0.0678386
M289T223	289.15	222.853	2.61881	Diacetoxyscirpenol	[M+H-C2H6O3]+		C09662	Lipids and lipid-like molecules	Prenol lipids	Sesquiterpenoids	226.393	23	9	1	8	5042	33404.2	44491.4	28835.2	21403	14898	18031.9	8677.31	20925.7	34187.2	32912.1	21106	23321.5	42796	37453.4	8243.37	26066.1	32018.6	32798.1	31979.5	0.0143095	0.0143095
M169T72	169.103	72.059	2.46166	Diazinon	[M+H-C4H9O3P]+	HMDB0032943	C14324	Organic acids and derivatives	Organic thiophosphoric acids and derivatives	Thiophosphoric acid esters	74.288	20	9	3	8	12090	42609	27635	32468	31907	11573.5	49748.2	17967.2	16838.8	41619	22074.2	20019.8	12116.3	23768.2	25643.7	26862.9	25603.2	26185.8	29222.4	26185.2	0.0644686	0.0644686
M344T74_1	344.242	74.288	5.16539	Dibucaine	[M+H]+	HMDB0014668	C07879	Organoheterocyclic compounds	Quinolines and derivatives	Quinolones and derivatives	75.983	15	5	3	7	19006	60786.1	40022.7	32653.4	172064	29580.1	36644.7	39857	56948.5	61754.1	60595.1	55753.6	56603.5	37283.8	69342.3	45557.7	41912.6	101008	99952.8	101031	0.00611677	0.00611677
M259T401	259.171	401.211	1.52028	Dibutyl adipate	[M+H]+		C14253	Lipids and lipid-like molecules	Fatty Acyls	Fatty acid esters	403.566	15	8	1	6	30750	29654.4	46518.7	88235.9	49016.1	5120.36	67842.1	52728	23818.3	17126.5	61043.8	38446.7	53530.1	59008.8	31730.9	20991.5	110499	51739.6	46672.4	51700.9	0.0582452	0.0582452
M279T402	279.142	402.007	3.07894	Dibutyl phthalate	[M+H]+	HMDB0033244	C14214	Benzenoids	Benzene and substituted derivatives	Benzoic acids and derivatives	412.853	32	10	2	9	8961	21364	23027.6	91915.6	29213.2	15653.7	39437.1	24453.7	24576.5	36296.3	36375.8	37120.6	46417	28971.6	19952	15020	69978.7	26311	27028.4	26309.4	0.0156184	0.0156184
M515T30_1	515.429	30.453	8.78452	Didodecyl 3,3'-thiodipropionate	[M+H]+	HMDB0040172		Organic acids and derivatives	Carboxylic acids and derivatives	Dicarboxylic acids and derivatives	30.678	13	6	1	6	1039784	739220	1.48347e+06	1.33646e+06	911854	950064	1.36069e+06	1.30173e+06	1.36496e+06	1.33483e+06	771130	809398	1.33179e+06	956106	1.4466e+06	1.36847e+06	844432	1.49145e+06	1.54339e+06	1.49132e+06	0.0199	0.0199
M531T31_4	531.426	31.1115	7.13547	Didodecyl 3,3'-thiodipropionate oxide	[M+H]+			Organic acids and derivatives	Carboxylic acids and derivatives	Dicarboxylic acids and derivatives	31.308	14	5	2	7	538419	111509	92817.3	184000	167957	112247	266822	229616	87949.1	371362	223936	95043.1	121126	117952	858619	159705	391503	135224	127218	127141	0.0357687	0.0357687
M521T155_1	521.302	154.842	9.76972	Digoxigenin monodigitoxoside	[M+H]+			Lipids and lipid-like molecules	Steroids and steroid derivatives	Steroid lactones	156.125	15	6	1	8	55969	44655.9	51031.6	85055.8	86542.7	36559.8	44780.9	80477.3	100829	84147.5	239736	79702.8	108285	103975	93252.5	182021	54552.6	93523.8	93524.9	95625.4	0.0128742	0.0128742
M308T106	308.233	106.221	3.55018	Dihydrocapsaicin	[M+H]+	HMDB0038457	C16952	Benzenoids	Phenols	Methoxyphenols	107.306	18	7	3	8	6374	26866.4	22070.6	19732.2	20141.1	36796.1	24875.7	32638.1	25072.9	16271.4	21620.7	29465.3	28550.3	41639.6	34847.3	13339.5	27241.8	31720.6	34449.5	31747.9	0.0480302	0.0480302
M381T33_1	381.361	33.069	6.54262	Dihydrotachysterol	[M+H-H2O]+	HMDB0015203	C06957	Lipids and lipid-like molecules	Steroids and steroid derivatives	Vitamin D and derivatives	50.722	19	8	1	7	13888	52168.4	63287.8	39934.9	60239.5	35097.6	56018.9	79604.6	39555.6	45262.2	42887.7	35573.4	62336.6	64607.3	27659	20146	28912.4	58021.6	59661.4	59710	0.0162535	0.0162535
M447T38_1	447.359	38.442	1.63262	Diisodecyl phthalate	[M+H]+		C14578	Benzenoids	Benzene and substituted derivatives	Benzoic acids and derivatives	39.62	17	9	1	7	181614	113020	407301	214020	131896	85479.5	133941	267230	198281	107819	191959	129548	476716	190260	237232	111255	142052	388246	271423	390394	0.194492	0.194492
M614T31_1	613.505	31.13	1.45721	Dilinolenin (9c,12c,15c)	[M+H]+			Lipids and lipid-like molecules	Fatty Acyls	Lineolic acids and derivatives	31.786	11	4	0	7	152022	61194	58538.5	132921	143043	80718.6	60474.3	63392.9	40335.4	51190.7	190250	14135.6	203711	217901	29273.3	136046	16705.1	129044	131260	129045	0.00985661	0.00985661
M164T69	164.098	68.7995	4.68126	Dimethylaminopurine	[M+H]+	HMDB0000473		Organoheterocyclic compounds	Imidazopyrimidines	Purines and purine derivatives	69.954	22	10	3	9	47521	64816.8	107090	57986.6	153274	319481	67480.2	87483.8	52607.1	125249	55759.4	55593.4	60382.5	118109	55682.9	106260	33523	90398.7	88405.9	88400.9	0.0129336	0.0129336
M185T64	185.135	63.52	9.16511	Dimethyl azelate	[M+H-CH4O]+			Lipids and lipid-like molecules	Fatty Acyls	Fatty acid esters	84.13	31	10	3	9	70200	168959	193060	104290	286587	49810.5	42014.1	247915	470533	229410	195826	173895	80758.9	117778	116059	431627	119882	188271	201534	188097	0.040012	0.040012
M352T374_1	352.23	374.142	1.92409	Dipivefrine	[M+H]+	HMDB0014592	C06963				375.438	13	8	1	4	9586	13774.9	8155.03	37237.9	14505.9	11952.1	12989.8	18914.2	14152	11627	30310.8	15945.1	16060.8	22147.6	15744.7	9765.12	26009.8	18195.2	17355.9	18178.3	0.0267879	0.0267879
M505T139_1	505.304	139.447	5.53788	Dipyridamole	[M+H]+	HMDB0015110		Organic nitrogen compounds	Organonitrogen compounds	Amines	141.044	14	8	1	5	6956	31539.3	32464.2	19584.6	35862.3	24727.6	29396.5	44743.1	43430.6	58900.5	50825.7	45775.5	31369.6	25311.8	40397.1	33892.7	28189.6	36398.2	37178.3	36431.2	0.0120306	0.0120306
M145T368	145.102	368.499	9.05696	Dl-5-hydroxylysine	[M+H-H2O]+			Organic acids and derivatives	Carboxylic acids and derivatives	Amino acids, peptides, and analogues	369.777	23	10	3	9	5233	9022.26	4124.88	37378.1	8991.47	10003	6851.57	7757.09	5370.95	8217.48	22952.3	9430.87	10717.2	19271.4	10178.9	13078.9	16345.7	10824.5	10818.4	11413.7	0.0310325	0.0310325
M152T277_1	152.074	276.98	2.10988	Dl-.alpha.-phenylglycine	[M+H]+	HMDB0002210		Organic acids and derivatives	Carboxylic acids and derivatives	Amino acids, peptides, and analogues	292.288	33	10	3	9	13040	35523.7	35747.5	70752.2	45413	14784.3	82657.3	20829.6	56602.2	40138.6	48742.2	45696	40836	46805.5	69575.2	13786.4	93868.8	32301.1	35071.9	32244.6	0.0486748	0.0486748
M175T525	175.125	525.316	7.963	DL-arginine	[M+H]+		C00792	Organic acids and derivatives	Carboxylic acids and derivatives	Amino acids, peptides, and analogues	543.346	37	10	3	8	170458	44524.4	540070	241163	261441	5.65594e+06	106864	109489	865688	327853	442648	250465	103343	64378.3	83875.9	1.76204e+06	431001	829798	684468	826360	0.106294	0.106294
M146T38	146.122	37.608	2.52885	Dl-.beta.-homoleucine	[M+H]+			Organic acids and derivatives	Carboxylic acids and derivatives	Amino acids, peptides, and analogues	47.855	23	10	3	9	77808	40684.9	128058	82950.8	60235.9	68142	171969	136777	62445.4	78889.9	115574	175703	174780	42165.6	80078.8	64724.4	101701	79519.6	79018.1	83253.5	0.0287128	0.0287128
M458T330	458.325	330.475	5.40384	D-leucinamide, n-[(phenylmethoxy)carbonyl]-l-leucyl-n-[(1s)-1-formyl-3-methylbutyl]-	[M+H-H2O]+			Organic acids and derivatives	Carboxylic acids and derivatives	Amino acids, peptides, and analogues	332.867	22	7	1	8	6528	10305.8	9988.93	5663.21	10283.3	11995.4	20929.1	6372.61	6601.32	17964.7	7224.88	8834.83	7420.68	8905.8	3431.53	4875.28	11317.6	9418.53	10924.6	9382.82	0.0888149	0.0888149
M148T398_2	148.065	398.061	3.16683	DL-Glutamic acid	[M+H]+	HMDB0060475	C00025	Organic acids and derivatives	Carboxylic acids and derivatives	Amino acids, peptides, and analogues	400.916	22	10	3	9	341339	448342	808281	492605	660615	441466	821420	1.35506e+06	892708	794657	806026	892794	954367	561573	1.00314e+06	632769	908840	695328	699266	697323	0.00282431	0.00282431
M147T530	147.118	529.741	8.11555	DL-Lysine	[M+H]+	HMDB0142894	C16440	Organic acids and derivatives	Carboxylic acids and derivatives	Amino acids, peptides, and analogues	552.953	37	10	3	9	36510	168109	619941	394081	417169	229686	214223	206445	1.14023e+06	556092	567486	834277	139990	137125	719002	603128	257977	610080	608834	543228	0.0651067	0.0651067
M134T42	134.066	41.556	9.42746	Dl-normetanephrine	[M+H-CH6O2]+	HMDB0000819	C05589	Benzenoids	Phenols	Methoxyphenols	48.814	22	9	3	8	27238	30081.9	43068.4	61441.3	25421.7	58300.9	105728	22555.2	30246.8	49170.7	39447.5	36845.6	23545.7	40655.8	55476	32304.7	27197.6	33898.1	30685.5	33911.3	0.0566092	0.0566092
M166T259_2	166.092	259.249	0.392584	DL-phenylalanine	[M+H]+		C02057	Organic acids and derivatives	Carboxylic acids and derivatives	Amino acids, peptides, and analogues	263.041	21	9	3	9	138565	223575	615004	304303	321996	1.02835e+06	612496	445995	617446	676613	289219	507242	483334	354767	412605	469104	213129	407998	422991	408152	0.0208499	0.0208499
M231T345	231.152	345.243	1.65797	DL-proline	[2M+H]+	HMDB0000162	C00148	Organic acids and derivatives	Carboxylic acids and derivatives	Amino acids, peptides, and analogues	346.908	20	8	1	9	27286	22577.7	22050.7	25837.2	120823	62324.6	159506	49159.8	51279.6	51655.8	107120	46637.3	44563.5	26377	57351.4	23245.4	51963.1	38280.3	39071.2	38283.5	0.0118222	0.0118222
M134T49	134.085	49.469	7.99566	Dl-threonine methyl ester	[M+H]+			Organic acids and derivatives	Carboxylic acids and derivatives	Amino acids, peptides, and analogues	60.508	23	10	3	9	15295	21960.3	52907	69599.6	55049.7	28655.1	79959.3	50554.8	38295	57549.9	39858	84147.2	59083.6	26945.8	58652.4	33682.1	39137.5	41356.6	41224.7	46460.6	0.0694096	0.0694096
M182T259	182.087	258.66	9.93446	DL-tyrosine	[M+H]+	HMDB0000158	C00082	Organic acids and derivatives	Carboxylic acids and derivatives	Amino acids, peptides, and analogues	261.158	21	10	3	8	15653	37756.1	36575.5	59030.8	86316	24013.8	36301.9	65363.7	39971.6	63606.2	98674.3	28820.1	46446	42817	66925.9	77571.4	38635	47636.5	51998.8	52066.1	0.050195	0.050195
M364T154_2	364.334	154.166	2.31511	Docosaenoyl ethanolamide	[M+H-H2O]+			Organic nitrogen compounds	Organonitrogen compounds	Amines	160.763	17	8	2	7	31140	153107	18013	6892.13	146432	79219.6	15259.4	29265	35725.4	5926.94	39490.4	11115	47331.5	10659.8	15417.7	20109.6	44075.7	41521.3	42774.1	41514.3	0.0172958	0.0172958
M340T123_1	340.367	122.751	6.23838	Docosanamide	[M+H]+	HMDB0000583		Lipids and lipid-like molecules	Fatty Acyls	Fatty amides	124.665	23	9	1	8	37753	49593.7	11013.8	4961.64	216342	93075.7	2864.05	12216.2	45720.6	17895.8	8593.9	16309.4	6765.61	37287.8	16304.1	12030.4	7454.18	41582.5	39953.5	40024	0.0227249	0.0227249
M179T46	179.148	46.3815	6.39393	Dodeca-2(e),4(e)-dienoic acid	[M+H-H2O]+			Lipids and lipid-like molecules	Fatty Acyls	Fatty acids and conjugates	49.402	28	10	1	9	36714	170803	103374	53217.9	71720.5	56920.4	79685.4	83398.5	173452	28298.2	96924.9	112866	182003	51557.7	62707.6	182944	136183	83265.3	81101.4	81100.6	0.0152719	0.0152719
M544T317	544.185	317.228	0.0875416	Doxorubicin	[M+H]+	HMDB0015132	C01661				328.689	14	7	1	4	8995	82760.3	98823.6	98813.2	115829	51915	90141.1	84868.2	100575	110968	104544	35752.9	89263.8	65042.3	89567.4	122189	71236.5	94388.9	101982	94480.9	0.0449441	0.0449441
M130T398_2	130.054	397.789	2.54669	D-pyroglutamic acid	[M+H]+		C02237	Organic acids and derivatives	Carboxylic acids and derivatives	Amino acids, peptides, and analogues	400.916	28	10	3	9	225971	539381	872917	554018	486829	537334	774703	1.30629e+06	665849	968366	597550	720529	985858	434507	1.00549e+06	483727	1.00125e+06	687520	653178	687826	0.0294545	0.0294545
M557T153_1	557.294	152.793	0.240102	Dronedarone	[M+H]+			Organic oxygen compounds	Organooxygen compounds	Carbonyl compounds	154.036	14	9	1	4	7051	19369.6	5214.31	22871.4	23341.7	16478.1	20424	25276.9	23617.2	32659.8	26667.1	25087.2	21792.4	32481.8	22154.1	32459.3	18556.5	24820.4	24813.3	25661.6	0.019433	0.019433
M311T76	311.23	76.27	8.43922	(e)-4-[(1r,2s,3s,4r,8as)-2,3,4-trihydroxy-2,5,5,8a-tetramethyl-3,4,4a,6,7,8-hexahydro-1h-naphthalen-1-yl]but-3-en-2-one	[M+H]+			Lipids and lipid-like molecules	Prenol lipids	Sesquiterpenoids	87.11	15	6	1	5	23323	130396	92515.6	39307.3	32597.4	89467.8	92865.8	89184	216377	64956.7	66128.3	210345	126071	66111.4	94871.8	96827.8	103796	107791	107545	66183.3	0.25524	0.25524
M186T276	186.118	276.069	7.1625	Ecgonine	[M+H]+		C10858				278.306	29	10	3	9	3885	9619.56	9105.36	26239.7	10608.1	11542.9	16122.7	12686	11119.8	10534.7	42973.1	8462.43	8387.93	23047.8	11675.5	15298.1	9692.44	9584.64	9756.82	9766.42	0.0105428	0.0105428
M657T418_1	657.375	418.33	8.5046	Echinocystic acid 3-glucoside	[M+Na]+			Lipids and lipid-like molecules	Prenol lipids	Terpene glycosides	420.669	11	5	1	5	8866	3932.62	6986.6	7490.35	5119.22	28302.2	12458.2	5693	7087.93	10691.2	7149.19	19180	10113.2	9126.73	6339.49	5709.37	5044.67	8128.64	8562.02	8147.01	0.0296021	0.0296021
M143T331	143.085	330.943	7.22425	Ectoine	[M+H]+		C06231	Organic acids and derivatives	Carboxylic acids and derivatives	Amino acids, peptides, and analogues	332.29	31	10	3	9	115958	103575	146538	85302.3	54881.1	417807	199452	39909.9	58912.6	304788	53811.9	64419.7	47224.8	109328	128291	35969.3	47540.6	120934	122344	122347	0.00668624	0.00668624
M183T131	183.082	131.268	3.69108	Eflornithine	[M+H]+			Organic acids and derivatives	Carboxylic acids and derivatives	Amino acids, peptides, and analogues	133.215	17	9	2	6	8251	34572	25454	32518.6	14695.4	13287	47558.7	23135.5	24946.6	40548.3	29194.6	16176	22090.9	24223.6	19840.4	7374.38	26401.6	27938.2	24426.3	24176.3	0.0824453	0.0824453
M303T103	303.239	103.396	2.53066	Eicosapentaenoic acid	[M+H]+	HMDB0001999	C06428	Lipids and lipid-like molecules	Fatty Acyls	Fatty acids and conjugates	115.807	14	7	1	6	11269	34370.5	24807	31442.7	60368.8	29014	31938.6	61217.7	44534.2	34198.5	26663.7	30398.8	29826	31888.8	33692.4	14174.3	30502.9	46409.1	45316.3	45298.8	0.0139258	0.0139258
M275T211	275.212	210.559	7.20512	Empenthrin	[M+H]+		C18524	Lipids and lipid-like molecules	Prenol lipids	Monoterpenoids	212.1	15	3	3	7	10496	17106.9	55897.9	37115	68315.5	32703.4	83785	63408.2	38791.1	41660	46332.7	30715.6	45604.7	49620.2	42029.5	25497.4	36278.7	26477.3	27182.2	32539.7	0.115387	0.115387
M662T335	662.412	335.109	3.6736	Enniatin b	[M+Na]+		C15740	Organic acids and derivatives	Peptidomimetics	Depsipeptides	346.698	11	6	1	4	3544	4989.52	6886.57	3962.73	16880.3	15694.5	21384	7304.11	5803.38	5846.65	4427.86	8013.81	3231.71	4066.41	4313.76	4915.87	4735.79	5058.27	5846.63	5860.26	0.0821615	0.0821615
M321T362_1	321.151	362.171	3.30858	Enoxacin	[M+H]+	HMDB0014610	C06979	Organoheterocyclic compounds	Diazanaphthalenes	Naphthyridines	364.016	15	8	1	6	5813	25118.6	17948.1	70960.1	22683.6	67099.5	29849.8	19306.3	25495.5	10940.5	58446.8	27892.3	43215.7	24153.2	23980.8	20330.6	34013.9	26914.9	22732.2	26907.4	0.0945496	0.0945496
M605T219_1	605.301	219.196	4.6459	Enterodiol	[2M+H]+	HMDB0005056	C18166	Lignans, neolignans and related compounds	Dibenzylbutane lignans	Dibenzylbutanediol lignans	234.162	12	7	1	4	17802	6244.18	8289.16	23696.6	32243.8	6744.58	16861.1	25111.7	7211.75	8254.41	60667.2	12134.5	7615.73	11111.6	28577.1	14498.3	9769.01	16589.4	17354.7	16587.5	0.0262646	0.0262646
M184T115	184.102	114.708	1.02405	Epinephrine	[M+H]+	HMDB0000068	C00788	Benzenoids	Phenols	Benzenediols	127.459	20	8	2	7	6941	32433.6	52441.1	31220.1	48580.3	14490.7	56415.6	29171.9	23408.8	33816.6	53570	27171.3	21519	23624.6	27991.3	33275.1	53254.5	32811	31217.3	31173.1	0.0294055	0.0294055
M508T186_1	508.29	185.774	4.25607	Epothilone b	[M+H]+		C12154	Phenylpropanoids and polyketides	Macrolides and analogues	Epothilones and analogues	186.522	14	7	1	6	9939	14174.7	27773.3	17353.6	16887.5	10095.3	22378.9	19235.2	20825.7	21818.6	16805.7	21950.2	34139.7	15796.5	18131.6	18628.4	14153.2	17114.4	17203.6	17114.8	0.00299846	0.00299846
M330T353	330.104	353.416	3.05209	Epoxiconazole	[M+H]+		C11229				362.487	13	7	1	4	8606	86249	64660.7	131624	62125.4	113992	70948.3	65250.9	104848	101896	107931	78793.3	87654	63786.6	52636.6	136673	68166.8	58025.1	59639.6	58024.5	0.01592	0.01592
M338T33	338.354	33.07	4.3195	Erucamide	[M+H]+			Lipids and lipid-like molecules	Fatty Acyls	Fatty amides	33.188	17	6	3	8	892318	453756	356835	274578	236516	1.01311e+06	529257	609983	743867	552261	397874	1.13519e+06	686651	316312	654349	823871	352219	837518	847883	836262	0.00758776	0.00758776
M420T326	420.153	325.819	9.34356	Esfenvalerate	[M+H]+	HMDB0031791	C10988	Lipids and lipid-like molecules	Fatty Acyls	Fatty acid esters	329.954	14	8	0	6	9871	17720.2	15471	6278.63	4868.36	24780.4	14616.2	37595.9	24389.9	5925.23	13312.7	24647	17379.5	25453.7	14486.7	41405.7	14416.5	19484.3	20689	19516.1	0.0345069	0.0345069
M271T404	271.176	404.281	6.72329	Estra-1,3,5(10),7-tetraene-3,17.beta.-diol	[M+H]+		C14485	Lipids and lipid-like molecules	Steroids and steroid derivatives	Hydroxysteroids	417.706	21	9	3	9	283424	284217	32178.9	839693	361437	58211.5	24298.7	371710	2640.59	24081.4	592847	311264	408481	521183	282470	220894	565129	317459	324745	324765	0.0130692	0.0130692
M160T119	160.104	119.157	9.0404	Ethcathinone	[M+H-H2O]+			Organic oxygen compounds	Organooxygen compounds	Carbonyl compounds	122.22	19	9	3	7	12386	41634.2	20429.4	55774.6	47146.5	33678.7	56860.1	83230.8	52536.7	56644.7	54327.2	102273	54963	129746	62062	38498.8	44999.5	58660.6	59998.3	58652.5	0.0131072	0.0131072
M229T239	229.105	239.397	0.490812	Ethylmorphine	[M+H-C4H7ON]+	HMDB0015509	C07537				244.854	21	10	2	9	10253	34153.3	46736.7	44011.2	37549.6	11964.5	29154.3	20175.3	20136.9	75713.6	35749.5	24906.1	25590.7	60235.6	27881.5	14000.3	32131	29384.8	30146.2	29259.8	0.0162107	0.0162107
M490T252	490.243	252.237	0.044955	Ethynylestradiol 17-.beta.-d-glucuronide	[M+NH4]+			Lipids and lipid-like molecules	Steroids and steroid derivatives	Steroidal glycosides	253.668	13	8	1	4	4256	10348.9	15469.5	16973.7	13824.2	12796.3	7941.18	16280.8	13110.4	25273	25386.3	6632.11	8252.37	9833.47	10530.1	14698.2	6095.37	12372.6	12506	12929.1	0.0230555	0.0230555
M757T305	757.263	305.37	2.47217	Euphodendroidin n	[M+Na]+			Lipids and lipid-like molecules	Prenol lipids	Diterpenoids	306.556	11	7	1	3	2381	3362.2	3044.48	3675.27	3981.22	2910.34	4843.82	4083.19	1754.93	3866.39	4855.57	2795.69	3561.94	2587.17	4158.63	1910.33	3550.34	2814.44	2838.95	2814.41	0.00501592	0.00501592
M349T181_1	349.148	181.215	6.26105	Eurycomalactone	[M+H]+		C08759	Lipids and lipid-like molecules	Steroids and steroid derivatives	Steroid lactones	182.005	12	6	1	5	7633	29379.8	14194.1	14859.6	30429.1	8102.7	16228.6	41631.3	16459.2	22513.6	26215.3	25731.8	13254.5	14428.6	22106.8	23101.2	26771.8	19749.7	19735.3	20410.6	0.0193229	0.0193229
M275T409	275.062	408.51	3.84977	Famotidine acid methyl ester	[M+H]+			Organoheterocyclic compounds	Azoles	Thiazoles	411.666	21	10	3	8	39503	7132.97	8178.79	13062.6	10407.4	11977	20787.7	9581.72	4935.95	13639	92131	14791.1	10511.1	17328.7	12736.6	7954.38	6353.92	14019.7	13926.6	14021.4	0.00388018	0.00388018
M306T27_1	306.07	26.769	3.89065	Fenoldopam	[M+H]+	HMDB0014938	C07693				28.218	12	5	1	6	54739	21879.6	1937.75	1420.28	1863.99	53763.5	1127.08	7708.63	99487.1	1545.87	1751.37	2876.26	19556.7	2000.42	1616.79	2823.87	2150.6	13525.5	14103.4	13395.4	0.0275584	0.0275584
M265T42	265.163	42.251	6.17388	Feruloyl putrescine (isomer of 1178)	[M+H]+	HMDB0139638	C08184	Phenylpropanoids and polyketides	Cinnamic acids and derivatives	Hydroxycinnamic acids and derivatives	46.27	21	10	3	8	43662	96279.7	37904.6	49348.5	264410	64638.4	52510.4	70682.7	30025.3	61419.6	81680.2	41391.7	64584.8	36278.6	71141.9	38380.3	97333	94910.9	94099.7	94101.1	0.00495869	0.00495869
M527T47_1	527.169	46.651	7.22843	Flavone base + 3o, 2meo, o-guaiacylglycerol	[M+H]+			Phenylpropanoids and polyketides	Flavonoids	O-methylated flavonoids	48.233	23	7	1	7	16466	7640.13	5499.87	23136.9	52057.8	13455.7	10569.3	15531.9	51785.4	14622.6	69418.1	77639.9	22049.4	23420.7	16769.9	7137.27	16776.6	28087.5	28454.2	28096.4	0.00741456	0.00741456
M489T390	489.059	389.747	5.00338	Flufenoxuron	[M+H]+		C18430	Benzenoids	Benzene and substituted derivatives	N-phenylureas	390.15	13	5	1	7	2625	2249.91	767.285	1653.85	2495.87	1332.61	1605.61	2543.82	3082.28	688.077	3019	4541.78	3138.31	1947.45	3533.42	771.667	3811.54	1896.72	2152.58	1926.51	0.0702432	0.0702432
M276T202_1	276.077	201.669	4.67854	Flumazenil	[M+H-C2H4]+	HMDB0015336	C07825	Organoheterocyclic compounds	Benzodiazepines	1,4-benzodiazepines	203.531	16	8	1	7	22913	32190.4	10476.7	10474.9	11733.4	4696.05	27523.2	6663.16	155826	12135.6	15083.3	66188.1	22615.8	11499	15526.1	24496.3	33198.3	21755.9	22341.4	21762.2	0.015316	0.015316
M495T162_1	495.223	161.946	7.7362	Fluocinolone acetonide	[M+H]+	HMDB0015181	C07007	Lipids and lipid-like molecules	Steroids and steroid derivatives	Pregnane steroids	162.647	11	7	1	3	6054	11184.7	16918.8	9949.93	9409.7	6217.04	12865.7	19569.2	22793.9	16081.4	19970.1	17687.1	26023.2	7711.25	18255.1	17884.8	21538.4	18664.1	18117.8	18119	0.0172178	0.0172178
M311T377	311.114	376.575	1.69931	Fluotrimazole	[M+H-C2H3N3]+		C18939				377.338	15	9	1	5	27436	16140.9	8475.97	52555.8	40895.8	15234.4	7766.66	24994.5	24201.4	9904.9	48870.7	32142.4	35964.2	22950.6	27400	18976.5	52408.6	27049.6	27052.2	26902.8	0.00316785	0.00316785
M438T219	438.18	219.453	0.37765	Fluphenazine	[M+H]+	HMDB0014761	C07010	Organoheterocyclic compounds	Benzothiazines	Phenothiazines	235.601	20	5	3	8	8440	4635.4	8072.99	12221.6	11137.4	11659.3	8539.21	7897.49	2335.86	21970.4	14867.1	5751.01	12808.9	11114.6	9031.88	8110.57	3787.24	8111.44	8089.37	6885.5	0.0911597	0.0911597
M316T432	316.112	432.125	3.44186	Flusilazole	[M+H]+	HMDB0039815	C18733	Benzenoids	Benzene and substituted derivatives	Halobenzenes	447.583	19	9	2	6	5157	9703.45	9853.57	13971	7662.33	4112.64	22472.6	10144.7	16198.1	22434.1	8070.14	3934.72	6284.55	7748.19	12985.7	3343.54	8976.36	15217.4	12365.2	14976.3	0.111498	0.111498
M395T34	395.377	33.7535	9.3947	Fucosterol	[M+H-H2O]+		C08817	Lipids and lipid-like molecules	Steroids and steroid derivatives	Stigmastanes and derivatives	35.683	16	8	1	7	44496	122922	222052	114909	136759	142977	130401	122810	115426	116727	129621	100477	187552	142870	115456	81395	85459.1	161574	162308	160335	0.00617877	0.00617877
M659T330_2	659.408	330.165	6.70832	Fucoxanthin	[M+H]+	HMDB0002741	C08596	Lipids and lipid-like molecules	Prenol lipids	Tetraterpenoids	330.623	11	4	1	6	8507	15359.7	9727.8	4992.82	48018.2	12123	30746.8	16261.5	10619.5	18099.9	5647.05	11056	14056.2	4652.65	8189.43	4977.19	13365.8	13604	13397.1	13604.2	0.00882881	0.00882881
M459T220_1	459.234	220.3	3.0937	Fumagillin	[M+H]+		C09668	Lipids and lipid-like molecules	Fatty Acyls	Fatty acids and conjugates	232.473	12	6	1	4	2418	6782.93	10538.8	7163.44	8548.71	11462.7	6961.92	8917.99	4077.29	9316.11	9723.79	7319.96	8523.08	8348.78	9051.86	7386.85	7737.52	7602.7	9192.21	9214.52	0.106601	0.106601
M334T285	334.147	285.286	2.55014	Furametpyr	[M+H]+		C18503				291.372	15	8	1	6	11612	56423	15544.6	27216.5	27819	32498	23853.4	55880.4	45867.6	28167.4	28411.4	35871.9	31024.1	32312.6	24924.8	53771.8	52843.1	13939.3	18897.9	13799.7	0.186807	0.186807
M252T337_1	252.172	337.439	4.04085	Furmecyclox	[M+H]+		C18912	Organoheterocyclic compounds	Furans	Furoic acid and derivatives	345.566	17	7	2	8	11694	24075.8	14307.9	19378.9	8016.23	4901.3	27808.5	11445.8	12583.4	29965	18380.5	16742.3	17668.2	14073.2	22400.5	6182.19	54569.4	13174.1	11888.3	11800.4	0.0625818	0.0625818
M539T200_1	539.334	200.337	3.99801	Fusidic acid	[M+Na]+	HMDB0015570	C06694	Lipids and lipid-like molecules	Steroids and steroid derivatives	Steroid esters	201.442	13	9	1	3	14238	19899.3	12325.1	16276.9	23650.2	14359.2	14074.5	19082	10538.9	18337.9	14861.2	13759	12829.2	12556.6	16048.4	5136.07	14782.9	9642.43	11415.4	9782.55	0.0958835	0.0958835
M905T490	905.302	490.064	3.46088	G2f	[M+H+Na]2+			Organic oxygen compounds	Organooxygen compounds	Carbohydrates and carbohydrate conjugates	492.108	10	8	0	2	4343	786.117	1341.01	10114.2	3541.16	6237.94	1828.37	2795.54	925.79	3035.79	6303.84	1725.02	1869.18	4048.2	6130.14	2757.31	273.073	3357.79	3489.12	3352.54	0.0227617	0.0227617
M406T376	406.147	376.172	4.67614	Galacto-n-biose	[M+Na]+		C07278	Organic oxygen compounds	Organooxygen compounds	Carbohydrates and carbohydrate conjugates	384.603	13	4	2	6	34078	9431.23	20030.6	56068	12231.1	97471.6	48633	38785.3	82716	9602.21	132720	24858.7	40161	33767.5	11950.6	462200	37224.5	73134.1	80799.5	72084.7	0.0631486	0.0631486
M104T368	104.073	368.425	9.35039	.gamma.-aminobutyric acid	[M+H]+	HMDB0000112	C00334	Organic acids and derivatives	Carboxylic acids and derivatives	Amino acids, peptides, and analogues	368.563	22	10	3	9	13081	13172	11780.4	19044.7	51599.1	20610.2	23109.6	20899.3	39571	11485.5	21106.9	31113.4	19424.4	19668.1	22483.3	12073.9	33506.2	24122.5	24376.9	24374.6	0.00601848	0.00601848
M163T33	163.153	33.436	1.97708	.gamma.-dodecalactone	[M+H-2H2O]+	HMDB0031683		Organoheterocyclic compounds	Lactones	Gamma butyrolactones	37.64	22	10	3	9	31841	82838.9	173186	69400.1	85308.4	81767.3	80357.4	94231.3	91584.4	51556.1	91633.5	100498	88228.1	74035.2	136810	66557.1	78477	103656	119023	103723	0.081372	0.081372
M129T357	129.07	356.569	5.57045	.gamma.-heptalactone	[M+H]+	HMDB0031681		Organoheterocyclic compounds	Lactones	Gamma butyrolactones	358.019	23	10	3	9	17073	22722.8	15973	20075.3	50334.7	75439.6	16718	19292.5	20297.2	27097.1	12215.6	14547.4	12684.3	79286.2	10678	40368.4	13358.2	55325.8	57537.5	57554.2	0.0225638	0.0225638
M276T455	276.164	454.876	7.94786	.gamma.-l-glu-.epsilon.-l-lys	[M+H]+	HMDB0003869	C21730	Organic acids and derivatives	Carboxylic acids and derivatives	Amino acids, peptides, and analogues	459.394	22	10	3	9	35922	25413.1	46982.1	77620.6	71861.8	34941.1	89671.1	27423.4	42597	85312.6	60799.5	36190.6	47946.2	41676.7	34089	111810	13693.9	51279.4	50630.1	47211.1	0.0439713	0.0439713
M121T369	121.105	368.526	8.65774	.gamma.-nonalactone	[M+H-2H2O]+	HMDB0031531	C08501	Organoheterocyclic compounds	Lactones	Gamma butyrolactones	370.408	22	10	3	9	20437	11077.1	17294	25260.7	18091.8	8580.72	42138.2	13529.8	11252.4	29888.6	20106.4	9379.82	10536.1	18968.5	14888.3	5699.03	16383.6	15990.9	15448.1	16003.7	0.0200565	0.0200565
M359T425	359.132	424.697	6.11147	Gardenin b	[M+H]+		C15109	Phenylpropanoids and polyketides	Flavonoids	O-methylated flavonoids	429.345	12	8	1	2	34816	335647	179338	346161	276046	338768	166241	185331	740530	340433	232371	485395	469717	341927	172823	201634	239613	226030	238603	225830	0.0317929	0.0317929
M639T278_1	639.328	278.074	4.25227	Geldanamycin, 17-demethoxy-17-[[2-(dimethylamino)ethyl]amino]-	[M+Na]+						280.216	14	6	1	7	15872	3509.56	4507.22	17471.3	12506.7	6025.29	13551.5	7934.08	6314.64	37685.8	27416.5	7632.81	10710.2	9082.39	11723.3	9651.42	5712.55	9378.74	10923.9	9989.28	0.0770718	0.0770718
M323T285_1	323.191	285.323	1.58568	Gelsemine	[M+H]+		C09207				291.662	17	10	1	6	90947	16752.2	12278	40397.1	27925.5	13307.7	36418.1	32504.8	33967.3	34131.9	351940	31037.6	24496.4	50513	36648	26505.4	2336.07	35604	39269.5	35665.2	0.0569629	0.0569629
M527T450	527.175	450.184	0.369272	Gentianose	[M+Na]+		C08239	Organic oxygen compounds	Organooxygen compounds	Carbohydrates and carbohydrate conjugates	454.272	13	6	1	6	151079	75803.5	37913.1	70939.4	103018	443655	34602.5	31149.2	99697.7	35140.7	35535.9	66208.5	47469.8	40238.5	48314.5	56277.4	38375.1	139636	142617	139510	0.0125075	0.0125075
M219T33_1	219.181	33.0705	2.00718	Germacrone	[M+H]+		C16966	Lipids and lipid-like molecules	Prenol lipids	Sesquiterpenoids	35.685	22	10	3	9	64438	118968	111007	127982	181818	172336	89997.1	190702	112660	75475.2	272745	108138	144500	130500	110123	150770	157715	185223	185208	183389	0.00571225	0.00571225
M146T353	146.097	353.416	4.45348	G-guanidinobutyrate	[M+H]+	HMDB0003464	C01035	Organic acids and derivatives	Carboxylic acids and derivatives	Amino acids, peptides, and analogues	367.831	23	10	3	9	97898	50892.7	27178.9	63131.3	106978	247836	45854.7	31019.7	61855.1	27528.7	46518.1	53194.3	30659.9	53983.2	35332.6	53353.8	44711	74050	77437.5	77474.1	0.025765	0.025765
M407T297	407.123	296.578	1.87085	Ginkgolide b	[M+H-H2O]+		C07602				301.076	15	7	1	7	6195	8243.17	9682.23	13797.9	8825.62	17404.2	20885	7714.3	11488	8351.04	15270.9	29310.3	10109.1	7737.21	6327.54	6665.85	11932.7	8273.34	8273.11	8348.65	0.00524759	0.00524759
M423T35_1	423.375	35.0235	4.14685	Ginsenoside f1	[M+H-C6H16O8]+			Lipids and lipid-like molecules	Prenol lipids	Terpene glycosides	36.33	14	7	1	6	490877	244050	264004	190521	304183	850525	191483	363066	391213	163318	466631	201160	280012	228414	181613	175087	220690	383402	346448	347418	0.0586506	0.0586506
M303T425	303.186	425.247	6.55346	Gln-arg	[M+H]+	HMDB0028791		Organic acids and derivatives	Carboxylic acids and derivatives	Amino acids, peptides, and analogues	441.415	30	10	2	9	34755	75804.1	203348	137250	92184.5	214900	405763	97427.1	88137.5	247698	56001.2	180961	147508	91933.2	48463.3	113106	68487.3	120933	121053	131365	0.0481187	0.0481187
M459T398_1	459.299	398.191	8.58617	Gln-Arg-Arg	[M+H]+			Organic acids and derivatives	Carboxylic acids and derivatives	Amino acids, peptides, and analogues	405.576	13	8	3	2	5049	15947.5	29642.9	17331.7	19384.3	44281.8	71897.2	20980.8	19434.2	32779.5	12479.1	38629.5	19460.9	10558.6	9696.73	21854.3	23184.6	11362.5	18271.6	20364.9	0.282666	0.282666
M276T432	276.126	432.335	3.53862	Gln-glu	[M+H]+			Organic acids and derivatives	Carboxylic acids and derivatives	Amino acids, peptides, and analogues	445.094	19	7	3	7	84620	54236.8	59479.7	72723.2	45610	75332.1	98343.8	73831.4	54639.9	50938.1	53391.6	54767.2	42524.3	55389.5	75376.1	56259.1	17622.2	18051.4	51218.3	51826	0.478797	0.478797
M432T453	432.231	453.033	0.0932416	Gln-Glu-Arg	[M+H]+			Organic acids and derivatives	Carboxylic acids and derivatives	Amino acids, peptides, and analogues	456.327	15	8	1	6	7595	18092.4	16505.2	32611.2	18707.9	9444.48	23878.8	17584.8	5747.77	19200.3	20509.8	10810.9	21489.3	16187.5	8996.72	25065.6	4798.57	21653.2	21589.6	20881.7	0.0200345	0.0200345
M360T328	360.199	328	6.30463	Gln-Gly-Arg	[M+H]+			Organic acids and derivatives	Carboxylic acids and derivatives	Amino acids, peptides, and analogues	329.954	13	6	3	4	6697	4373.05	22327.7	28912.9	25997.7	12626	47730.7	20275.9	6031.69	7805.61	9115.12	8633.15	19035.8	22445.7	6628.48	6740.89	6627.47	8926.88	8438.08	8436.07	0.0328809	0.0328809
M260T289	260.168	288.521	9.89437	Gln-leu	[M+H]+			Organic acids and derivatives	Carboxylic acids and derivatives	Amino acids, peptides, and analogues	292.042	21	10	2	9	16868	29285.9	65984.7	97027.2	38475.3	93171.4	79983.7	44702.6	53137.6	76202	48793.7	69338.2	51528.8	42519.1	32115.2	46796.1	43201.8	50920.1	51339.9	50562.2	0.00764154	0.00764154
M416T374	416.272	374.141	8.55449	Gln-Leu-Arg	[M+H]+			Organic acids and derivatives	Carboxylic acids and derivatives	Amino acids, peptides, and analogues	377.535	18	9	1	6	9783	21233.7	39411.2	58313	13761.1	60746.3	39480.9	23384.6	39785.3	55885.5	21828.9	44628.7	6615.1	26017.2	15029	45378.3	40915.7	30555.6	31913.1	31956.8	0.0253116	0.0253116
M388T388_1	388.266	387.748	0.52139	Gln-Leu-Lys	[M+H]+			Organic acids and derivatives	Carboxylic acids and derivatives	Amino acids, peptides, and analogues	389.126	20	8	1	8	33796	23501.8	93525.6	39596.2	17907.2	86495.4	145319	26326.8	29554	102295	32486.4	68176.1	37284.6	28421	15283.8	36594.1	30750.2	40476.9	41663.8	40492.8	0.0166515	0.0166515
M275T443	275.181	443.361	6.7898	Gln-lys	[M+H]+	HMDB0028802		Organic acids and derivatives	Carboxylic acids and derivatives	Amino acids, peptides, and analogues	450.121	25	8	3	8	21253	64717.5	102657	247163	97446.8	207002	131625	31349.6	141748	169746	102447	66915.4	132167	63596.4	52447.1	71884.1	85968.5	111786	110284	89034.6	0.1227	0.1227
M244T313	244.138	312.769	2.67076	Gln-pro	[M+H]+	HMDB0028805		Organic acids and derivatives	Carboxylic acids and derivatives	Amino acids, peptides, and analogues	313.756	15	7	3	5	26961	40989.7	8251.34	113288	36392.5	8804.26	10022.9	22027.7	20752.9	8706.12	62114.4	32204.5	40281.3	111919	31191.2	16475.8	55060	31583.1	32463.6	31626	0.0155669	0.0155669
M374T406_1	374.25	405.667	2.00297	Gln-Val-Lys	[M+H]+			Organic acids and derivatives	Carboxylic acids and derivatives	Amino acids, peptides, and analogues	406.463	17	9	1	7	59198	70855	233021	125748	38132.9	169422	267423	80252.7	69209.2	275365	48126.2	162345	74551.4	54548.9	35122.6	65500.6	44983.3	80655.6	81684.6	80672.5	0.00727484	0.00727484
M347T454	347.204	453.918	8.02731	Glu-Ala-Lys	[M+H]+			Organic acids and derivatives	Carboxylic acids and derivatives	Amino acids, peptides, and analogues	458.631	30	8	3	8	14807	14363.2	34363.4	49974.7	30004.4	20134.4	37831.4	39792.9	33724	66987.5	51932.1	24307.8	39621.5	31130.3	38322.5	46891.7	17357.5	49217.2	53170.4	49072.8	0.0460557	0.0460557
M418T434	418.194	433.617	1.73159	Glu-Asn-Arg	[M+H]+			Organic acids and derivatives	Carboxylic acids and derivatives	Amino acids, peptides, and analogues	437.405	17	9	1	7	11040	13557.5	18456	20559.3	16642.8	19614.1	20376.4	20440.4	7959.28	29289	14359.8	13069.9	10088.9	12663.4	19681	9264.8	8997.67	17661.2	17651.3	17657.3	0.00028389	0.00028389
M333T456	333.185	455.593	3.5184	Glu-Gly-Lys	[M+H]+			Organic acids and derivatives	Carboxylic acids and derivatives	Amino acids, peptides, and analogues	460.704	19	10	1	7	8834	7644.63	17382.4	30214.1	22295.1	18221.8	36294.8	16538.9	12065.7	40502	31290.3	21275.9	35103.5	20450.2	37669.1	33159.6	13470.3	19760.1	20106	19346.6	0.0192648	0.0192648
M285T43	285.084	42.897	7.05747	Glu-His	[M+H]+	HMDB0005781	C14536	Phenylpropanoids and polyketides	Isoflavonoids	Isoflav-2-enes	63.174	22	10	1	8	803167	327254	76817.2	50956.9	125550	1.24553e+06	59973.3	41926.9	96580.1	65308.3	50975.9	99220.9	76210.5	68422.5	93540.3	40530.3	96341.6	511615	511605	518282	0.00749688	0.00749688
M389T404	389.248	404.299	4.93388	Glu-Ile-Lys	[M+H]+			Organic acids and derivatives	Carboxylic acids and derivatives	Amino acids, peptides, and analogues	412.336	27	9	1	7	27622	33393.5	133359	110604	48182.7	132568	184962	107107	36434.6	264482	69263.2	55078	78406.2	52207	68128.6	137541	78062.6	201692	179168	201731	0.0670223	0.0670223
M404T506_2	404.265	505.596	5.05693	Glu-Lys-Lys	[M+H]+			Organic acids and derivatives	Carboxylic acids and derivatives	Amino acids, peptides, and analogues	509.876	15	4	3	8	2464	2151.1	3849.25	3570.71	7204.56	5297.95	11507.5	3265.99	552.262	13036.7	4069.61	3190.36	4567.53	3177.7	4949.61	5805.4	2488.23	4357.93	4496.89	4356.48	0.0183139	0.0183139
M83T380	83.0517	380.438	7.5346	Glutaraldehyde	[M+H-H2O]+	HMDB0029599	C12518	Organic oxygen compounds	Organooxygen compounds	Carbonyl compounds	381.207	18	8	2	8	8438	15439.4	21432.6	17001.8	22539.1	42292.1	27235.2	19014.1	21132	18236.5	12507.3	20870.3	17933	17490.9	14095.8	26362.5	17440.5	19249.9	19426.7	19820.2	0.01497	0.01497
M613T481	613.177	481.123	3.94646	Glutathione, oxidized	[M+H]+	HMDB0003337	C00127	Organic acids and derivatives	Carboxylic acids and derivatives	Amino acids, peptides, and analogues	482.3	12	5	1	5	4619	2375.95	6001.56	7185.82	6113.57	20299.3	6951.18	5424.13	5925.69	5257.57	3225.04	5508.05	7977.97	6625.81	6631.84	5839.48	4300.82	6792.09	6790.93	6532.5	0.022302	0.022302
M405T441	405.219	440.877	4.54982	Glu-Thr-Arg	[M+H]+			Organic acids and derivatives	Carboxylic acids and derivatives	Amino acids, peptides, and analogues	448.251	14	9	1	3	5808	19653.5	25158.3	49563.6	20736.7	15253.8	45350.7	22302.6	20627.2	33034.2	16915.9	24072.9	31411.5	15591.7	15027.9	33239.3	20126.4	26045	28009	26098.8	0.0418708	0.0418708
M377T435	377.189	435.029	7.63644	Glu-Thr-Lys	[M+H]+			Organic acids and derivatives	Carboxylic acids and derivatives	Amino acids, peptides, and analogues	437.82	11	4	1	6	4056	8505.62	14112.5	26059.6	14221	7489.6	12283.9	23107.8	11115	12231.1	11972.7	7600.93	14836.9	13749.3	13615.9	15357.1	11638.9	8322.64	13143.1	13203	0.24234	0.24234
M403T411_1	403.244	410.743	5.01877	Glu-Val-Arg	[M+H]+			Organic acids and derivatives	Carboxylic acids and derivatives	Amino acids, peptides, and analogues	421.841	23	7	2	7	32481	36781.1	26868.3	207570	59295.9	83207	132206	42723.2	44765.8	158145	76376.2	62950.6	64489.7	13233.7	21675.8	27966.1	32376.7	40494.9	39859.1	26909.8	0.214417	0.214417
M375T420_1	375.234	420.032	1.29363	Glu-Val-Lys	[M+H]+			Organic acids and derivatives	Carboxylic acids and derivatives	Amino acids, peptides, and analogues	430.665	21	10	1	7	27509	12385	66498.5	81031.5	62222.5	40717.3	146883	48939.5	19017.9	135008	56832.5	50610.8	66310.8	61088.3	28915.2	103882	15461.5	47677.6	50097.7	47624.7	0.0291497	0.0291497
M232T435	232.148	435.362	0.418285	Gly-Arg	[M+H]+			Organic acids and derivatives	Carboxylic acids and derivatives	Amino acids, peptides, and analogues	442.745	22	10	3	9	23014	43886	47717.6	180463	42430.5	211031	68126.5	26185.6	110590	60271.7	33169.1	33742.2	37259	59119.7	8459.1	76817.6	40833.4	76905.9	78921.7	76905.8	0.015003	0.015003
M346T436	346.192	436.371	5.94678	Gly-Asn-Arg	[M+H]+			Organic acids and derivatives	Carboxylic acids and derivatives	Amino acids, peptides, and analogues	440.765	17	10	1	5	9887	25388.5	57221.3	33966.9	30380.1	34900.2	52629.5	24313.7	24012.8	46079.1	20521.8	29787.2	27302	27439.8	6856.69	15766.1	15056.9	33094.9	30497.6	33020.9	0.0459148	0.0459148
M285T36	285.253	36.0185	1.36979	Glycerol 1-myristate	[M+H-H2O]+			Lipids and lipid-like molecules	Glycerolipids	Monoradylglycerols	48.571	20	7	3	9	206214	337657	397485	134004	558312	202504	310342	369763	11563.5	330120	759356	482100	322449	332134	415809	376947	432563	424163	424066	411363	0.0175354	0.0175354
M104T259_2	104.111	259.253	8.5343	Glycerophosphocholine	[M+H-C3H7O5P]+	HMDB0000086	C00670	Lipids and lipid-like molecules	Glycerophospholipids	Glycerophosphocholines	260.512	22	10	3	9	1480874	2.05316e+06	2.21973e+06	4.51898e+06	3.4881e+06	2.65741e+06	1.605e+06	3.79011e+06	6.29678e+06	3.92158e+06	3.48319e+06	4.93982e+06	3.84262e+06	2.39248e+06	3.10353e+06	5.39712e+06	3.23047e+06	3.7032e+06	3.83508e+06	3.70489e+06	0.0201874	0.0201874
M431T390	431.124	389.885	0.223798	Glycine, n,n'-[1,2-ethanediylbis(oxy-2,1-phenylene)]bis[n-(carboxymethyl)-	[M+H-CH2O2]+			Organic acids and derivatives	Carboxylic acids and derivatives	Tetracarboxylic acids and derivatives	403.745	15	8	1	6	3205	4791.13	1336.48	4345.27	5506.58	3526.85	5090.81	8438.51	12333.4	7027.7	4414.81	7279.36	10165.7	6139.74	5514.6	4802.08	6454.66	5255.39	6724.91	6727.65	0.136181	0.136181
M488T402	488.294	401.747	9.47264	Glycocholate	[M+Na]+	HMDB0000138	C01921	Lipids and lipid-like molecules	Steroids and steroid derivatives	Bile acids, alcohols and derivatives	403.03	14	7	1	6	42554	12918.6	23594.6	33316.5	23663	142973	71927	25879	30459.1	42845	24971.8	110024	47543.5	25560	9548.3	32992.7	36679.3	31479.4	33052.4	32534.1	0.0247743	0.0247743
M412T161	412.289	161.325	8.2715	Glycocholic acid	[M+H-3H2O]+	HMDB0000138	C01921	Lipids and lipid-like molecules	Steroids and steroid derivatives	Bile acids, alcohols and derivatives	175.813	11	5	1	5	8805	24080.5	39360.4	24472.6	23021.3	40427.6	31194.7	13180.9	33179	39273.8	24301.3	18392	40579.2	28322.7	25879.2	14413.4	21442	30467.9	30481.3	29765.5	0.0135399	0.0135399
M357T159	357.293	159.047	8.75771	Glycodeoxycholic acid	[M+H-C2H7O3N]+	HMDB0000631	C05464	Lipids and lipid-like molecules	Steroids and steroid derivatives	Bile acids, alcohols and derivatives	161.234	23	7	3	8	1005310	238596	4.62507e+06	185450	65143.8	603553	48701.1	101481	4.36251e+06	66686.2	67013.2	159042	3.44545e+06	58026.9	92824.6	1.64176e+06	168199	814976	814984	804670	0.00733435	0.00733435
M345T267	345.226	266.962	7.17469	Gly-Ile-Arg	[M+H]+			Organic acids and derivatives	Carboxylic acids and derivatives	Amino acids, peptides, and analogues	284.017	28	7	3	9	37062	23583.8	11719.5	33647.8	7697.7	34801.5	18723.4	9888.16	13669.9	16701.8	24802.6	8513.13	23193.2	18560	18074.1	96063	5159.87	13685.6	14302.5	18261.3	0.161058	0.161058
M345T345	345.234	345.048	5.81464	Gly-Leu-Arg	[M+H]+			Organic acids and derivatives	Carboxylic acids and derivatives	Amino acids, peptides, and analogues	354.886	19	8	1	6	14918	42375.7	34849.6	65919.7	28820.2	43688.8	54480.6	21401.5	32136.5	108356	30606.4	22807.8	44142.1	38301.5	15205.1	23075	23220.6	46006.5	34071	46086.1	0.164406	0.164406
M425T249_1	425.25	248.93	2.36515	Gly-pro-arg-pro-amide	[M+H]+			Organic acids and derivatives	Carboxylic acids and derivatives	Amino acids, peptides, and analogues	249.68	15	7	1	5	12033	5278	11910.7	14358.7	13909.2	37994	24443.2	15271.3	40040	16557.3	15760.1	34438.4	28532.8	8017.8	8122.06	21224.7	15553	11597.8	12046.5	11589.3	0.0222692	0.0222692
M302T417	302.146	417.466	9.35528	Gly-Pro-Glu	[M+H]+			Organic acids and derivatives	Carboxylic acids and derivatives	Amino acids, peptides, and analogues	433.932	26	10	2	9	5412	18885.8	32049.8	14980.3	29367.5	5406.74	30204	21957.3	18369.9	36830.1	10888.4	16244.8	32912.2	20236.4	23403	26717.8	13185.6	18719.8	18146.2	18200.9	0.0172457	0.0172457
M331T386	331.221	386.079	0.627105	Gly-Val-Arg	[M+H]+			Organic acids and derivatives	Carboxylic acids and derivatives	Amino acids, peptides, and analogues	398.723	16	4	3	8	8645	11735.4	21721.7	66621.4	18369.9	53699.8	114322	12189.6	16744.3	47380.4	18954.9	14190.1	20347.9	21942.4	11720.6	13971.5	11700.2	20414.9	20949.2	24902.7	0.110979	0.110979
M303T401_1	303.211	401.211	3.20046	Gly-Val-Lys	[M+H]+			Organic acids and derivatives	Carboxylic acids and derivatives	Amino acids, peptides, and analogues	402.236	19	10	1	8	12472	24255.4	46280.4	45914	33901	72001.2	88953	30525.5	28114.7	98544.2	29473	26787.4	50217.2	35032.7	14456.7	35802	20036.8	31510.9	32865.5	32876.7	0.0242252	0.0242252
M519T367	519.195	366.588	5.98486	Gomisin c	[M+H-H2O]+		C10881	Phenylpropanoids and polyketides	Tannins	Hydrolyzable tannins	367.114	12	6	1	5	175891	70573.5	55176.4	119664	100268	58922.6	482265	48095.1	212732	101000	60250.8	28340.9	190332	28557.5	36992	188835	46379.6	93208.2	95215.9	93211.3	0.0123377	0.0123377
M501T449	501.208	448.791	4.9434	Gossypol	[M+H-H2O]+	HMDB0040723	C07667	Lipids and lipid-like molecules	Prenol lipids	Sesquiterpenoids	455.822	14	8	0	4	15112	211434	136866	86201.3	397668	82511.3	143802	156406	315921	167366	223693	269687	89035.7	226201	200871	155178	155400	186651	186519	179780	0.0213188	0.0213188
M130T38	130.069	37.644	3.6352	Gramine	[M+H-C2H7N]+	HMDB0035762	C08304	Organoheterocyclic compounds	Indoles and derivatives	Indoles	49.211	23	10	3	9	62968	86689.1	80338.5	62624.1	78967.8	161055	174200	73042.2	93760.6	89048.8	29375.5	63570	110767	74814	124316	124680	109330	71752.6	58295.3	59290.2	0.118817	0.118817
M152T230	152.061	229.618	4.24459	Guanine	[M+H]+	HMDB0000132	C00242	Organoheterocyclic compounds	Imidazopyrimidines	Purines and purine derivatives	230.641	22	10	3	9	120930	100217	153210	194118	123482	155160	154146	88443.1	189898	89681.6	237802	108968	92705.9	176087	79329.3	231540	132345	166441	167473	164975	0.00754745	0.00754745
M183T46	183.097	45.991	5.89544	Harmane	[M+H]+	HMDB0035196	C09209				48.762	25	10	3	9	43712	181405	211223	255861	208558	37832.9	357800	57044.4	129161	230167	198603	109734	71856	158583	147946	20297	252602	182194	190963	191038	0.0270365	0.0270365
M213T193	213.082	192.875	5.74654	Harmine	[M+H]+	HMDB0030311	C06538				193.874	15	6	3	6	67183	53271	5803.35	4630.92	5085.25	4492.37	3749.39	56597.2	172243	21982.7	4826.3	10558.4	4308.06	5315.27	6237.13	3592.78	1435.07	29562.4	30914.6	29565.6	0.0259803	0.0259803
M514T198_1	514.245	197.76	5.13821	Harringtonine	[M+H-H2O]+		C10597				198.862	14	8	1	5	18994	20429.5	26889.3	9641.74	19937.3	12406.8	24295.5	25577.4	34087.8	19704.5	24567	15126	16738.1	19734.9	16935.1	35850.1	12243	17934.9	19423.2	18031.5	0.0451049	0.0451049
M268T35	268.275	35.019	9.5073	Heptadecasphing-4-enine	[M+H-H2O]+			Organic nitrogen compounds	Organonitrogen compounds	Amines	36.33	15	4	3	8	60267	66299.2	83056.2	49159.7	55037.3	28788.8	56887.9	75093.3	86067.3	59469.2	125627	70930.2	63554.4	86576.2	50559.3	68350.3	82914.1	56115	58140.8	56114.9	0.0205952	0.0205952
M288T120	288.299	119.75	0.918538	Heptadecasphinganine	[M+H]+			Organic nitrogen compounds	Organonitrogen compounds	Amines	120.685	21	9	3	9	309966	1.56165e+06	1.5803e+06	480643	716669	219912	1.67695e+06	545596	1.86353e+06	1.25934e+06	424877	707004	1.02749e+06	1.16702e+06	864677	802845	840949	970552	992193	970538	0.0127825	0.0127825
M260T220_1	260.191	220.28	8.5016	Hexanoyl-l-carnitine	[M+H]+	HMDB0000756		Lipids and lipid-like molecules	Fatty Acyls	Fatty acid esters	222.493	11	4	1	6	30744	7782.27	3121.08	6970.18	12871.5	33623.5	4468.17	5050.29	5630.61	1812.58	4172.18	2639.48	3657.27	11407	4069.07	2670.38	3577.47	74986.7	76699.5	74993.7	0.0130606	0.0130606
M367T214	367.222	214.03	8.25382	Hirsuteine	[M+H]+		C16971				222.481	21	7	3	8	24183	154853	191131	37611.6	78628.3	122439	62806.7	68301.2	88762.5	88850.7	288499	126095	74386.8	33847.7	39903.4	94682.6	40335.8	51505.7	57312.6	52109.5	0.0595169	0.0595169
M369T213_2	369.238	212.715	4.08593	Hirsutine	[M+H]+		C16972				219.112	20	6	3	7	111962	474461	599642	177296	620884	115270	757035	399072	252878	988643	118052	285060	330038	270318	258070	29020.7	236696	410704	375580	410796	0.0508878	0.0508878
M269T293	269.173	293.404	7.63053	His-Leu	[M+H]+		C05010	Organic acids and derivatives	Carboxylic acids and derivatives	Amino acids, peptides, and analogues	294.101	12	4	2	6	9106	5455.79	15803.6	9840.49	6933.35	37042.8	12890.8	9182.62	7228.43	10727.6	4346.84	10129.7	4150.68	1472.99	6603.89	5606.76	8010.87	10661.8	10409	10665.9	0.0139116	0.0139116
M306T263	306.09	262.678	8.90514	His-Lys	[M+Na]+	HMDB0000133	C00387				279.473	21	10	1	9	117194	58589.2	149808	81874	87263.5	97156	51908.7	69239.2	60041.7	87162.9	52798.7	57633	59732.2	84645	42985.9	249244	25378.1	122737	123677	122735	0.00441594	0.00441594
M235T141	235.127	141.068	1.93248	His-Pro	[M+H-H2O]+			Organic acids and derivatives	Carboxylic acids and derivatives	Amino acids, peptides, and analogues	142.234	21	9	2	9	58422	38586.3	30166.8	47574.1	44754.9	283887	50363.3	21549.1	24297.2	35894.2	26841.5	25433.8	20554	38999.9	44547.1	27523.9	26640.9	52749	53674	52733.3	0.0101531	0.0101531
M112T363	112.091	362.938	6.94236	Histamine	[M+H]+	HMDB0060263	C00388	Organic nitrogen compounds	Organonitrogen compounds	Amines	364.514	19	8	3	8	71059	33333.8	193334	41112.7	802277	157078	39500.1	53871.5	385167	13988.1	54102.1	65602.9	30234.3	18591.6	142710	16180.6	89642	121862	121809	118329	0.0167801	0.0167801
M319T223	319.109	223.297	4.91725	His-Tyr	[M+H]+	HMDB0014620	C06906	Organoheterocyclic compounds	Benzothiazines	Phenothiazines	224.739	20	10	1	9	10059	12928.7	14095.3	18309.9	15013	20705	5110.8	6003.91	21907.3	13358.4	14347	31242.1	39378.2	13261.5	33327.8	7258.01	18547.9	19744.1	19188	19795.4	0.0172093	0.0172093
M411T87_1	411.262	87.4495	4.60564	His-Val-Arg	[M+H]+			Organic acids and derivatives	Carboxylic acids and derivatives	Amino acids, peptides, and analogues	90	14	8	1	5	32294	85858.7	117215	36268.3	12722.2	36621.8	52873.3	74221.5	191022	48053.8	30280.9	11573.1	36985.3	12119.7	5316.64	267677	19140.6	73011.5	69414.8	73038.1	0.0290199	0.0290199
M309T400	309.189	399.901	2.42985	Hydrocortisone	[M+H-3H2O]+	HMDB0000063	C00735	Lipids and lipid-like molecules	Steroids and steroid derivatives	Hydroxysteroids	401.576	17	9	1	7	50634	75628.6	18651.8	231967	97964.9	20238	18476	137219	92080.9	17912.5	168916	92753.4	127355	137483	102799	79627.1	147305	95058.6	96654.2	96667.9	0.00962485	0.00962485
M405T216	405.226	216.352	1.28501	hydrocortisone 21-acetate	[M+H]+		C02821	Lipids and lipid-like molecules	Steroids and steroid derivatives	Pregnane steroids	232.631	13	5	2	5	20415	8314.83	22440.5	16012.8	15007.3	19324.1	84228.7	18013.9	16092	75202.2	17110.1	6403.67	17925.1	7561.37	18329.6	4475.69	2492.09	21652.6	21019	21668	0.0172678	0.0172678
M286T415	286.154	414.873	1.74855	Hydromorphone-3-.beta.-d-glucuronide	[M+H-C6H8O6]+						416.439	13	4	2	6	8378	13172.2	16692.5	22671.6	30478.4	13708.5	22702.4	20203.7	15330.7	25995.8	48210.2	18043.9	15126.1	22880.8	18550.3	19277.6	28264.3	23198.7	24485.4	22932	0.0352872	0.0352872
M339T409_1	339.171	409.483	6.23185	Hydroxygardnutine	[M+H]+						415.104	13	7	1	5	7365	20229	11830.3	37881.5	38598.3	23684.3	31530	18487.1	26915.3	22275.7	64091.8	19484.9	16459.7	22373	18342.2	25564.9	39845.6	26239.8	24359.7	26298.3	0.0430219	0.0430219
M325T360_1	325.222	360.394	9.49685	Hymeglusin	[M+H]+			Lipids and lipid-like molecules	Fatty Acyls	Fatty acids and conjugates	361.645	14	5	1	8	3053	6899.39	3758.53	17393.7	7919.96	3862.34	5460.94	20634.1	5731.32	18941.5	18688.2	7865.89	12266.4	11033.6	7145.34	14267.8	20334.1	19871.3	17576.8	19991.9	0.0710759	0.0710759
M556T444_1	556.283	443.796	2.06707	Hypaconitine	[M+H-C2H4O2]+		C08688	Lipids and lipid-like molecules	Prenol lipids	Diterpenoids	445.898	14	8	1	5	3362	8224.05	17480.1	10152.5	5932.13	10267.5	19219.6	9397.01	11097.8	14754.2	11740.8	8327.51	13078.2	11208.1	5748.67	9278.67	9801.42	11247	11238.6	11624.2	0.0193722	0.0193722
M537T31_1	537.405	30.509	4.65473	Hyperforin	[M+H]+		C07608	Lipids and lipid-like molecules	Prenol lipids	Monoterpenoids	38.324	13	8	2	3	47058	88962.7	135267	120808	105243	82018.3	113890	133925	109950	101465	74173.4	103895	105088	83226.2	117332	91143.8	85927.5	37085.7	88220.3	87361.1	0.413007	0.413007
M137T172_2	137.051	171.735	2.98644	Hypoxanthine	[M+H]+	HMDB0000157	C00262	Organoheterocyclic compounds	Imidazopyrimidines	Purines and purine derivatives	172.774	22	10	3	9	3055881	9.94456e+06	1.89894e+07	7.74828e+06	1.0394e+07	7.62448e+06	1.41091e+07	1.35086e+07	1.89357e+07	2.0608e+07	1.08055e+07	1.96976e+07	1.94393e+07	7.21006e+06	1.97144e+07	9.89547e+06	1.69081e+07	1.28994e+07	1.29821e+07	1.28992e+07	0.00369919	0.00369919
M497T414_1	497.16	413.851	3.52413	Icariside ii	[M+H-H2O]+			Phenylpropanoids and polyketides	Flavonoids	Flavonoid glycosides	415.099	13	7	1	5	190797	208956	32548.5	67458	122521	403840	15826.5	30065.6	475412	41782.1	46224.7	225375	102052	64710	84946.4	1.02048e+06	107962	122638	121788	122640	0.0040175	0.0040175
M288T222	288.201	222.393	9.86965	Ile-Arg	[M+H]+			Organic acids and derivatives	Carboxylic acids and derivatives	Amino acids, peptides, and analogues	228.029	22	10	3	9	14833	27062	35627.9	59936.1	44730.2	37524.4	99353.2	34800	31346.1	49964.1	31146.6	32188	53145.9	36400	29761.8	23857.9	26910.3	32551.3	33866.7	32568.9	0.0228635	0.0228635
M187T463	187.15	462.908	9.69962	Ile-Leu-Lys	[M+2H]2+			Organic acids and derivatives	Carboxylic acids and derivatives	Amino acids, peptides, and analogues	466.453	21	10	2	9	19178	82230.4	100701	160967	97731.8	83102.7	201163	102734	129732	136972	136623	91447.6	76853	73810.8	121567	56300.1	146020	101852	99615.7	101857	0.0127817	0.0127817
M342T224	342.247	223.857	5.55743	Ile-Pro-Ile	[M+H]+			Organic acids and derivatives	Carboxylic acids and derivatives	Amino acids, peptides, and analogues	239.615	18	10	1	6	5648	14239.5	21533.2	32562.2	19242	53329.9	76748.2	20798.9	29901.1	34363.2	12258.8	35080	22525.8	17322.5	13962.1	15671.8	20533.7	26669.3	28259.7	26701.6	0.033408	0.033408
M233T218	233.159	217.57	5.70825	Ile-Thr	[M+H]+			Organic acids and derivatives	Carboxylic acids and derivatives	Amino acids, peptides, and analogues	219.223	14	8	3	3	7102	32693.9	52307.6	64360.9	54635.9	16215.9	65621.1	26213.3	26247.8	69342.3	53370.7	25054.6	34758.7	47876.4	29795	17548.6	42108.7	31389.4	35403.9	35395.3	0.0679702	0.0679702
M389T343	389.265	342.949	3.36688	Ile-Thr-Arg	[M+H]+			Organic acids and derivatives	Carboxylic acids and derivatives	Amino acids, peptides, and analogues	346.724	20	6	3	8	10572	9880.33	24415.7	36272.1	12914	50957.7	77946.4	13016.3	19193.4	28608.2	24143.8	27305.7	20440.1	17511.6	9053.93	15249.8	14953	11863.8	11864.6	11763.4	0.0049182	0.0049182
M318T360_1	318.172	360.017	1.58662	Ile-Trp	[M+H]+			Organic acids and derivatives	Carboxylic acids and derivatives	Amino acids, peptides, and analogues	361.098	11	6	1	4	7214	14115.5	18138.6	19805.4	15136.2	5869.61	43754.3	17622.9	9089.16	29396.4	19620.1	13121.8	17767.8	14788.2	9523.45	12402.2	12434	16903.4	16309.9	16906.6	0.0205641	0.0205641
M234T388	234.131	388.425	1.86401	Imazapyr	[M+H-CO]+		C18864	Organic acids and derivatives	Carboxylic acids and derivatives	Amino acids, peptides, and analogues	398.277	22	9	1	6	58126	380552	313800	11030.7	370158	90790	571818	280633	275797	405428	38209.6	25533.1	54047.9	30273.2	224682	15065.5	38294.2	149157	150111	150115	0.00368352	0.00368352
M248T137	248.122	137.341	1.60936	Imazethapyr	[M+H-C3H6]+		C18865	Organic acids and derivatives	Carboxylic acids and derivatives	Amino acids, peptides, and analogues	139.087	22	10	3	9	89018	412615	463065	417285	412819	50424.7	636105	275763	312714	637616	344977	349620	337567	439860	421476	156666	399846	365120	365116	361239	0.00615513	0.00615513
M477T145	477.27	145.16	1.43624	Imidazo[5,1-f][1,2,4]triazin-4(1h)-one, 2-[(3,4-dimethoxyphenyl)methyl]-7-[(1r)-1-[(1r)-1-hydroxyethyl]-4-phenylbutyl]-5-methyl-	[M+H]+			Benzenoids	Benzene and substituted derivatives	Methoxybenzenes	155.737	14	8	1	5	47441	120928	3596.15	107486	119521	67691.8	214533	263372	189184	239587	295783	342182	226727	127678	204661	225159	295204	189380	186175	187498	0.00858175	0.00858175
M321T65	321.098	64.54	6.84882	Inabenfide	[M+H-H2O]+		C10942	Benzenoids	Benzene and substituted derivatives	Anilides	66.327	21	6	3	6	11596	17940.3	13341.1	15804.6	14761.1	11611.7	112919	33636	28674.6	15454.4	22754.4	37780.5	95135.9	37208.9	156856	5333.05	92290.7	33591.7	45171.6	46001	0.166814	0.166814
M227T246	227.146	246.103	8.74422	Indalone	[M+H]+		C19142	Organoheterocyclic compounds	Pyrans	Pyranones and derivatives	247.485	21	9	3	9	6237	21607	28765.5	42938.9	23745.1	14647.6	29207.4	24155	18971.7	38528.8	26707.5	20022.5	22508.9	29642.1	28641.5	12199.5	26903.4	22387.5	22388.7	22722.8	0.00858785	0.00858785
M160T124	160.08	124.123	2.18638	Indole-3-acetaldehyde	[M+H]+	HMDB0001190	C00637	Organoheterocyclic compounds	Indoles and derivatives	Indoles	125.985	22	10	3	9	36547	53593.6	52717.3	69546.5	87652.7	32495.2	75503.6	195506	45385.8	88267.2	101871	143706	147112	188142	130152	55037.9	71361.7	95398	96816.1	95415.8	0.0084866	0.0084866
M176T274	176.072	274.013	3.85587	Indoleacetic acid	[M+H]+	HMDB0000197	C00954	Organoheterocyclic compounds	Indoles and derivatives	Indolyl carboxylic acids and derivatives	277.513	33	10	3	9	7713	17695.3	23385.9	39569.1	28320.9	74033.9	31901.4	21579	56920.3	62631.5	26255.8	38753.2	39465.6	51823.4	33377.2	72800.8	17092.8	35735.3	35518	19731.2	0.302618	0.302618
M313T360	313.169	359.894	8.54093	Ingenol	[M+H-2H2O]+		C09112	Lipids and lipid-like molecules	Prenol lipids	Diterpenoids	368.547	18	10	1	7	19734	33166.5	22559.5	33894.8	33258.2	19882.8	61421.6	26816.4	18288.8	52518.1	20448.7	16795.3	26721.8	39927.2	22615.8	23181.5	2335.57	29204.1	29217.8	28265.6	0.0188888	0.0188888
M291T218	291.081	218.465	3.55871	Inosine	[M+Na]+	HMDB0000195	C00294				219.431	17	6	3	8	250628	88067.5	502510	313307	137329	25952.8	127480	152375	67833.7	234592	67752.3	96366.5	191903	131987	146663	482087	60972	614315	599505	614299	0.0140245	0.0140245
M321T409	321.194	409.041	1.60906	Iprovalicarb	[M+H]+		C18866	Benzenoids	Benzene and substituted derivatives	Toluenes	409.793	14	6	3	5	6846	7770.67	4256.05	36058.7	4687.82	20568.9	14632.9	19074.3	17589.9	5645.6	17964.6	12512.6	19863.3	26047.1	18407.3	11866.6	20310.6	13008.9	10309.3	11129.5	0.120531	0.120531
M257T236	257.083	235.764	3.97356	Isoliquiritigenin	[M+H]+	HMDB0037316	C08650	Phenylpropanoids and polyketides	Linear 1,3-diarylpropanoids	Chalcones and dihydrochalcones	237.178	20	8	3	9	20366	31373.6	25551.8	24327.1	27139.5	142792	24874.7	18467.3	88253.4	8052.57	10036.1	45149.5	51654.4	27527.1	31462.5	50889	29964.6	35648.3	35624.5	35151.8	0.00789347	0.00789347
M204T58	204.13	57.914	0.286585	Isopentenyladenine	[M+H]+		C04083	Organoheterocyclic compounds	Imidazopyrimidines	Purines and purine derivatives	59.894	19	10	1	8	8591	19327.8	43457.9	52701.3	51147.4	24884.9	23377.1	64326.6	33828.1	52474.6	46360.2	28133.7	32978.6	38099.7	32565.1	23155.2	25219.7	38120.3	34397.7	36774.7	0.0517412	0.0517412
M589T34_1	589.418	34.36	4.95118	Isopropyl dodecylfluorophosphonate	[2M+H]+			Organic acids and derivatives	Organic phosphonic acids and derivatives	Phosphonic acid esters	35.033	11	7	1	3	250794	59848.1	62034.5	54687.6	42684.8	102456	80474.9	82753.1	68296.8	83739.1	85511.5	75117	72623.4	67674.9	97560.2	33488.3	50126.3	437644	428405	428582	0.0122436	0.0122436
M194T325	194.124	325.421	8.78663	Isoproterenol	[M+H-H2O]+	HMDB0015197	C07056	Benzenoids	Phenols	Benzenediols	326.66	21	10	3	8	11909	116552	90459.5	95362.8	87979.6	89496.4	76158.7	87159.2	91730.4	89526.5	86632.8	97246.2	86707.4	99940.7	88072.5	97144.2	84477.1	90553	92516.6	93089.9	0.0144528	0.0144528
M246T237	246.178	236.806	1.30076	Isovaleryl-l-carnitine	[M+H]+			Lipids and lipid-like molecules	Fatty Acyls	Fatty acid esters	238.052	14	4	3	7	16163	10666	5721.33	17178.8	64408.7	73311.1	3921.37	6849.48	8884.54	5479.89	5916.12	6006.53	5295.17	11635.8	6692.07	7709.33	4918.33	52387.2	53880	52400	0.0162269	0.0162269
M299T40_1	299.1	40.26	4.18154	Isoxanthohumol	[M+H-C4H8]+			Phenylpropanoids and polyketides	Flavonoids	Flavans	52.153	31	10	2	9	124572	169452	154227	198396	140964	35357.5	159586	236265	156911	125387	295223	130935	202405	206910	162142	69062.3	167700	187754	179424	179395	0.0264437	0.0264437
M211T107	211.139	106.818	5.46981	Jasmonic acid	[M+H]+	HMDB0032797	C08491	Lipids and lipid-like molecules	Fatty Acyls	Lineolic acids and derivatives	110	13	5	3	5	15205	45581.2	15394	28370.1	28471	53565.9	26093.4	23268	29652	26087.5	36451.3	30572.6	33126.1	23275.4	34352.8	33098.3	36085.4	36034.8	35642.2	35260.1	0.0108675	0.0108675
M175T221	175.028	221.004	5.4075	Juglone	[M+H]+	HMDB0030773	C03840	Benzenoids	Naphthalenes	Naphthoquinones	222.089	22	10	3	9	10300	11816.9	35153.5	16278.7	20288.1	22960.7	21158.9	20620.7	25190.4	23836.8	9379.89	28574.9	26651	13598.3	27043.9	20517.7	14599.5	18167.3	17850.4	18167.5	0.0101322	0.0101322
M315T380	315.199	380.472	5.79135	Kahweol	[M+H]+						381.305	10	6	0	4	4778	7630.19	5896.43	17158.7	8064.22	6552.23	10155.5	8958.28	9360.04	9518.62	12052.2	6393.15	6631.39	10508.7	9875.34	8469.37	10481.6	10013.2	10015.4	9652.7	0.0211001	0.0211001
M485T323_1	485.235	323.026	7.90063	Kanamycin a	[M+H]+	HMDB0015303	C01822	Organic oxygen compounds	Organooxygen compounds	Carbohydrates and carbohydrate conjugates	323.237	14	7	1	6	3714	16572.4	19044.9	31558.1	16841.6	22681.7	30060	21497	25705.9	25300.6	30786.8	18805.1	27164.7	20900.2	28592.9	15082.5	22540.2	21408.8	21830.1	21427.6	0.011041	0.011041
M531T137	531.32	137.198	9.08274	Kukoamine b	[M+H]+	HMDB0060525		Benzenoids	Phenols	Benzenediols	139.046	13	8	1	4	6217	19150.1	58327.7	19385.9	45510.6	22148.5	34118	31913.1	44435.8	38580.7	37321.6	46983.5	27365.7	20760.7	32868	11557.2	30277.8	28790.2	28224.4	28789.1	0.0114101	0.0114101
M330T133	330.195	132.63	8.62029	Kukoline	[M+H]+		C09643				134.066	15	7	1	7	13105	26915	42606.6	37360	31148.4	14947.1	26037.3	26015.9	21824.9	41975.4	35744	22997.6	28331.2	51688.4	19260.9	7078.57	27143.8	33638.6	32716.9	33586.9	0.0155442	0.0155442
M535T92	535.281	91.903	4.34927	Lappaconitine	[M+H-CH6O2]+		C08694	Lipids and lipid-like molecules	Prenol lipids	Diterpenoids	93.979	13	8	1	4	48500	40417.7	29405.6	55049.3	136204	84465.2	35998.5	159796	61253.9	23261	98855.7	16378.8	42494.1	35337.6	80687	67936.3	61934.1	103794	116849	103966	0.0692031	0.0692031
M412T401_1	412.228	400.785	6.16763	Lasiocarpine	[M+H]+		C10341				402.54	15	7	1	7	8538	11851	26053.6	23841.8	5487.01	7824.04	10840.3	66348.7	11538.4	57496.2	13809	34700.2	9693.61	10863.2	26707.7	11068.7	7399.26	23708.2	24841.8	23704.9	0.0272131	0.0272131
M433T240	433.274	239.972	4.63089	Latanoprost	[M+H]+			Lipids and lipid-like molecules	Fatty Acyls	Eicosanoids	241.079	11	7	1	3	8348	14414.1	35844.4	28360.8	13673.2	19025.1	30638.2	33501	20412.6	22070.1	14018.3	27285.7	21486	15978.6	27381.8	10845	13819.9	18460.9	18048.3	18048.1	0.0131018	0.0131018
M343T167	343.304	167.215	3.11196	Lauramidopropylbetaine	[M]+			Organic acids and derivatives	Carboxylic acids and derivatives	Amino acids, peptides, and analogues	167.896	18	9	1	8	4565	12607.7	10407.1	4143.76	4794.96	2580.57	4906.55	4313.69	7760.33	8718.43	6284.03	7878.06	8108.66	6640.68	15152.5	9069.44	10160.5	7650.64	7652.4	7768.29	0.00876733	0.00876733
M292T161	292.183	161.214	2.42434	L-bunolol	[M+H]+	HMDB0015341	C07914				162.647	21	9	3	9	27089	39380.4	38268.2	34249.9	18833	11441.3	64206.3	63383.1	17136.9	51843.6	24078.3	79871.2	96436.1	41070.3	113440	16512.7	39657.2	40059.5	40061	38758.2	0.0189704	0.0189704
M227T277_1	227.091	276.691	1.50578	L-carnosine	[M+H]+	HMDB0000033	C00386	Organic acids and derivatives	Peptidomimetics	Hybrid peptides	278.823	16	8	1	7	3273	6103.16	15769	22393.1	9077.2	11576.4	9155.5	13984.5	12761.3	16660.9	19556.1	8416.56	13432.7	10065.1	12872.1	5013.36	7957.03	11409	10994.4	11417.4	0.021453	0.021453
M176T393	176.107	393.269	8.32848	L-citrulline	[M+H]+	HMDB0000904	C00327	Organic acids and derivatives	Carboxylic acids and derivatives	Amino acids, peptides, and analogues	397.06	22	9	3	8	335121	235443	344149	163529	235456	327299	978954	232287	785779	1.03331e+06	223262	403135	393086	335621	252149	751769	256211	289483	287897	182805	0.241276	0.241276
M541T200_1	541.35	200.317	9.6599	Leptomycin b	[M+H]+			Lipids and lipid-like molecules	Fatty Acyls	Fatty acids and conjugates	201.442	13	8	1	4	152705	48808.6	137342	20985.8	40313.7	571234	582035	45396.7	108624	58762.8	16281.7	23767.6	52411.3	25907.5	31468.9	12989.7	32745.9	129951	128024	129949	0.00859687	0.00859687
M203T376_2	203.146	376.373	8.71059	Leu-Ala	[M+H]+			Organic acids and derivatives	Carboxylic acids and derivatives	Amino acids, peptides, and analogues	376.853	20	9	3	8	48143	31526.5	28184.3	18418.9	24676.2	70287.5	173994	112665	164514	109823	44460.2	82909.4	71582.1	25207.1	42720	75067.7	121139	64639.7	65072.1	64640.3	0.0038505	0.0038505
M331T359	331.245	358.938	7.60222	Leu-Ala-Lys	[M+H]+			Organic acids and derivatives	Carboxylic acids and derivatives	Amino acids, peptides, and analogues	378.548	24	8	3	9	20718	14417.2	64250.3	73318.2	29139.2	78862.9	203936	33643.3	35083.3	115881	41601.1	43929.7	47993.3	24394.6	20816.1	27510.9	30360.1	35652.4	32389	32246.7	0.0576294	0.0576294
M375T497	375.233	496.822	1.00006	Leu-Asp-Lys	[M+H]+			Organic acids and derivatives	Carboxylic acids and derivatives	Amino acids, peptides, and analogues	500.461	17	9	1	7	6200	6987.48	9365.08	14728	21478.1	9256.52	9109.07	14142.9	13434	14148.4	17120.7	8219.37	11444.4	10616.5	15308.9	14448.9	20947.2	12834.3	12774.7	11722.9	0.050238	0.050238
M245T184	245.195	183.516	2.48109	Leucylleucine	[M+H]+	HMDB0028933	C11332	Organic acids and derivatives	Carboxylic acids and derivatives	Amino acids, peptides, and analogues	184.543	18	7	3	8	127844	178978	419746	465547	241842	660473	685115	285090	347124	402531	285218	394285	338485	225733	139499	249161	294116	315430	317898	315435	0.00450091	0.00450091
M302T228	302.22	228.157	0.849079	Leu-Gly-Leu	[M+H]+			Organic acids and derivatives	Carboxylic acids and derivatives	Amino acids, peptides, and analogues	246.683	16	6	3	6	9738	24824.8	37365.1	18862.1	24345.7	116907	77069.8	23677	30726.4	30576.5	36718.3	63270.3	31986	10880.5	26349.2	28619.2	36776.8	24766.3	24755.3	24022.7	0.0173859	0.0173859
M493T212_1	493.289	211.787	7.57607	Leukotriene d4 methyl ester	[M+H-H2O]+			Organic acids and derivatives	Carboxylic acids and derivatives	Amino acids, peptides, and analogues	219.873	14	9	1	3	73636	36151.5	255683	34583.3	41918.5	84507.2	28076.6	50060.8	21906.4	41307.6	26414.3	27711.1	133178	34851.1	227179	17729.6	14890.7	70272.9	70268.8	71002.7	0.00599228	0.00599228
M569T152_1	569.296	152.272	9.37295	Leukotriene f4	[M+H]+		C06462	Lipids and lipid-like molecules	Fatty Acyls	Eicosanoids	153.154	12	8	1	3	23078	40963	35472.6	16167.7	19910	23563.8	23472.4	62586	95822.1	37890.2	38821.4	84418.7	57631.5	29054	72668	42637.8	48030.7	45871	45846	46926.3	0.013343	0.013343
M263T188	263.151	188.132	8.62021	Leu-Met	[M+H]+			Organic acids and derivatives	Carboxylic acids and derivatives	Amino acids, peptides, and analogues	189.122	21	9	3	9	28621	42771.8	87691.1	85261	51383.9	112176	162850	71181	83824	83437.4	74875.6	118637	122454	48228.3	41448.9	52918	85459.6	72053.8	72059.8	70873	0.00953737	0.00953737
M229T266	229.163	266.444	0.196452	Leu-Pro	[M+H]+			Organic acids and derivatives	Carboxylic acids and derivatives	Amino acids, peptides, and analogues	268.32	18	8	3	7	41712	59158.8	97141.8	140909	122692	351398	110706	83324.1	79386.8	140979	65131.2	60349.1	104661	82784.2	66339.8	86519.5	33126.3	86887.1	87000.2	75247.1	0.0813207	0.0813207
M231T198	231.178	197.757	1.67075	Leu-Val	[M+H]+			Organic acids and derivatives	Carboxylic acids and derivatives	Amino acids, peptides, and analogues	199.512	21	9	3	9	223030	227610	373648	798897	351533	986533	1.04255e+06	278547	279106	661148	280111	401383	406015	282136	181928	244115	265693	391455	396359	391517	0.00715647	0.00715647
M362T390	362.153	389.53	3.42353	Levofloxacin	[M+H]+	HMDB0001929	C07660	Organoheterocyclic compounds	Quinolines and derivatives	Quinoline carboxylic acids	403.757	19	4	3	6	5393	12273.2	8571.37	16937.4	19221.6	10537.4	13076.4	12621.2	10479.7	11476.3	27309.8	12080.2	15445.7	15541	9784.07	15476.4	21059.5	12728.1	12130.1	12129	0.0280284	0.0280284
M165T348	165.097	348.028	4.91414	L-Fucose	[M+H]+	HMDB0062489	C01019	Organic oxygen compounds	Organooxygen compounds	Carbohydrates and carbohydrate conjugates	349.397	22	10	3	9	5096	2678.71	3809.42	10835.3	5557.02	4228.69	7524.26	4478.73	4915.59	6913.05	9038.19	4193.19	3956.05	6919.09	5198.95	2535.85	3430.58	3501.98	3171.81	3170.01	0.058253	0.058253
M144T94	144.07	93.7945	0.521306	L-glutamic acid, dimethyl ester	[M+H-CH4O]+			Organic acids and derivatives	Carboxylic acids and derivatives	Amino acids, peptides, and analogues	94.972	22	10	3	9	16554	36950.5	88714.3	51499.3	56368	28782.4	122140	88253	64893.4	59414.8	71164.1	79443.8	83486.4	38367.4	79182.7	30632.4	73405.8	64830.8	64832.1	66961.3	0.018762	0.018762
M144T317	144.106	317.195	1.41403	L-homoarginine	[M+H-CH3ON]+	HMDB0000670	C01924	Organic acids and derivatives	Carboxylic acids and derivatives	Amino acids, peptides, and analogues	331.217	24	10	3	8	42921	61946.4	60412.2	93050.2	137008	23881	96393.5	55841	49193.3	89197.4	154470	43992.7	46960.6	81316.8	62693	36214.3	63410.3	66816.6	68489.7	66848.6	0.0141998	0.0141998
M190T276	190.112	275.737	0.977299	L-homocitrulline	[M+H]+	HMDB0000679	C02427	Organic acids and derivatives	Carboxylic acids and derivatives	Amino acids, peptides, and analogues	277.687	15	9	1	4	3315	3568.84	4243.9	18227.2	5487.64	7738	5724.49	4336.71	5277.91	8584.43	10873.8	3793.58	6207.51	6680.07	7585.99	5213.57	7612.29	8010.39	8766.89	8018.72	0.0525546	0.0525546
M116T309_2	116.074	309.077	4.60293	L-hydroxyarginine	[M+H-CH5ON3]+	HMDB0004224	C05933	Organic acids and derivatives	Carboxylic acids and derivatives	Amino acids, peptides, and analogues	311.021	22	10	3	9	153725	224011	265723	186784	292267	713327	190179	261454	528813	199734	213868	420918	300412	229851	299034	314491	207224	242003	249233	250017	0.0178799	0.0178799
M369T168	369.367	167.799	0.224721	Lignoceric acid	[M+H]+	HMDB0002003	C08320	Lipids and lipid-like molecules	Fatty Acyls	Fatty acids and conjugates	182.264	17	8	1	6	130455	37035.1	119462	131889	38218.2	5738.15	21719.3	162822	47568.5	70374.8	395116	88235	171369	87088.3	196338	22612.6	309142	132707	132703	129933	0.0121442	0.0121442
M407T52	407.242	52.075	3.88906	Lincomycin	[M+H]+		C06812	Organic acids and derivatives	Carboxylic acids and derivatives	Amino acids, peptides, and analogues	56.084	25	6	1	8	14374	23813.9	35812.4	20477.3	13490.2	82223.9	37896.3	29662.5	33750.3	55149.7	31979.4	66938.9	33964.9	30735.9	34688.5	12169.4	31954	43745.4	40726.9	40805.6	0.0411986	0.0411986
M263T101	263.244	101.135	8.08604	Linoleic acid methyl ester	[M+H-CH4O]+	HMDB0034381		Lipids and lipid-like molecules	Fatty Acyls	Lineolic acids and derivatives	108.65	19	10	1	8	278024	101890	152222	45431	95368.8	122363	215876	249248	473551	54907.6	35724.3	269968	116224	17093.2	212723	43630.6	336808	56908.9	86916.6	60252	0.241747	0.241747
M279T38	279.239	37.5895	5.82481	Linolenic acid	[M+H]+	HMDB0001388	C06427	Lipids and lipid-like molecules	Fatty Acyls	Lineolic acids and derivatives	57.994	36	10	1	9	836433	1.09272e+06	1.68139e+06	659810	1.41477e+06	1.38401e+06	720937	1.42584e+06	1.23304e+06	387395	1.92978e+06	3.37557e+06	1.57976e+06	716005	1.03483e+06	627111	1.23715e+06	1.01861e+06	1.10248e+06	1.10558e+06	0.0458768	0.0458768
M424T169	424.351	169.166	0.411249	Linoleoylcarnitine	[M+H]+	HMDB0006469		Lipids and lipid-like molecules	Fatty Acyls	Fatty acid esters	170.217	15	9	1	5	72258	7762.79	18935.6	5952.1	3143.51	24879.5	3555.46	44529	21954.6	3374.18	85668.1	12796.6	23538.2	17442.2	8721.66	207250	7963.46	81110.1	82046.5	82053.1	0.00663762	0.00663762
M324T36	324.299	35.681	8.27137	Linoleoyl ethanolamide	[M+H]+	HMDB0012252		Organic nitrogen compounds	Organonitrogen compounds	Amines	36.329	21	10	2	9	331600	201397	348649	148167	206063	282622	211648	185163	304999	241038	172245	221831	216914	185154	169049	208554	169544	248053	247947	235430	0.0297655	0.0297655
M245T85	245.232	85.003	8.84819	Linoleoylglycine	[M+H-C2H7O3N]+			Organic acids and derivatives	Carboxylic acids and derivatives	Amino acids, peptides, and analogues	87.381	10	6	0	4	11306	42256.8	72087.8	68805.3	54469.8	25090.5	43913.8	40009.7	92082.9	37490.7	76329.2	63599.9	58197.9	41989.9	51505.4	22411.4	55729.2	50522.5	48840.4	50517.1	0.0194075	0.0194075
M129T384	129.106	383.955	6.76136	Lisdexamfetamine	[M+H-C9H13N]+	HMDB0015385		Organic acids and derivatives	Carboxylic acids and derivatives	Amino acids, peptides, and analogues	384.512	21	9	3	9	27158	25681.9	22905.2	13423.9	17803.6	21973.9	24073.5	60018.4	94763.4	31590.7	33621.1	85552.1	51231.2	13316.3	39633.4	24406.4	64025.5	36206.4	37313.6	36213.4	0.0174207	0.0174207
M410T153	410.22	153.03	3.27604	Lisinopril (8r,s)-diketopiperazine	[M+Na]+			Organic acids and derivatives	Carboxylic acids and derivatives	Amino acids, peptides, and analogues	167.886	18	8	3	7	8797	28229.4	41499.6	31877.3	22873.2	35656.4	44500.5	44376.4	38918.1	43329.1	25886.1	55386.2	55600.4	24007.7	25533.6	36863.2	35556.2	46234.5	48569.4	48579.7	0.0282678	0.0282678
M416T123_1	416.326	122.745	2.77686	Lithocholylglycine	[M+H-H2O]+	HMDB0000698	C15557	Lipids and lipid-like molecules	Steroids and steroid derivatives	Bile acids, alcohols and derivatives	124.951	16	10	1	4	14927	78933.9	121710	102828	54151.6	19774.6	25514.1	70767.4	88841.5	76914	62281	81294.5	47069.3	10256.6	55459.1	143853	22856.4	61632.5	56083.8	61619.3	0.053526	0.053526
M259T36	259.213	36.332	3.44006	L-leucyl-l-leucine methyl ester	[M+H]+			Organic acids and derivatives	Carboxylic acids and derivatives	Amino acids, peptides, and analogues	50.692	22	9	3	9	112018	273075	173583	232117	237432	178721	263719	292704	77611.8	158682	302470	280424	373836	237819	205543	208190	178897	243846	236976	248546	0.0239338	0.0239338
M150T286	150.063	286.012	1.94339	L-methionine	[M+H]+	HMDB0000696	C00073	Organic acids and derivatives	Carboxylic acids and derivatives	Amino acids, peptides, and analogues	290.722	23	10	3	9	19784	41013.7	125520	65050.5	51367.9	158970	135437	84571.4	113304	141465	54969.2	101822	91453.8	59040.2	90858.9	81402.3	48126.6	87083.5	88959.8	87840.8	0.010731	0.010731
M118T270	118.09	270.5	0.110099	L-norvaline	[M+H]+	HMDB0013716	C01826	Organic acids and derivatives	Carboxylic acids and derivatives	Amino acids, peptides, and analogues	297.986	36	10	3	9	2195921	601436	513256	1.35911e+06	847717	3.69401e+06	343020	604232	1.11324e+06	492869	633192	1.19365e+06	983832	1.33159e+06	902356	1.32009e+06	559565	2.90974e+06	2.92002e+06	2.90954e+06	0.00205717	0.00205717
M400T171	400.355	170.694	9.29859	L-palmitoylcarnitine	[M+H]+	HMDB0000222	C02990	Lipids and lipid-like molecules	Fatty Acyls	Fatty acid esters	171.132	16	6	2	8	458549	32851.3	72244.2	39401.7	13494.4	32742	10511.6	355586	1400.66	28705.4	220328	61009.4	2061.69	11438.9	48916.6	1.31285e+06	6417.87	261520	260706	260424	0.00218198	0.00218198
M130T272	130.09	272.16	6.83593	L-pipecolic acid	[M+H]+	HMDB0000716	C00408	Organic acids and derivatives	Carboxylic acids and derivatives	Amino acids, peptides, and analogues	289.665	21	10	2	8	35362	39949.7	42073	34899.1	95139.1	27537.3	127738	60575.4	127719	62487.4	28816.5	50531.9	51320.5	44137.5	71320.5	64543.9	37355.9	51036.5	51433.6	50386.1	0.0103786	0.0103786
M218T276	218.146	275.823	8.01506	L-propionylcarnitine	[M+H]+	HMDB0062514		Lipids and lipid-like molecules	Fatty Acyls	Fatty acid esters	291.71	23	10	3	9	480364	11847.3	32689.1	26129.1	1.375e+06	122869	48603.7	5689.24	67200	8081.06	19070.5	12688.5	7518.62	10514.4	14013.3	11185.5	21337.1	342533	347189	345505	0.00683243	0.00683243
M324T286_2	324.226	285.719	6.27503	Lsd	[M+H]+	HMDB0000802	C00715	Alkaloids and derivatives	Ergoline and derivatives	Lysergic acids and derivatives	291.372	23	10	1	7	22246	50499.4	25508	187665	51485.6	9498.77	9142.63	116860	45039.5	17909.3	56057.2	124913	125946	159591	93262.6	29424.4	76018.6	95373.5	98707.7	95378.6	0.0199357	0.0199357
M210T39	210.119	38.936	3.1382	L-tyrosine, ethyl ester	[M+H]+			Organic acids and derivatives	Carboxylic acids and derivatives	Amino acids, peptides, and analogues	43.449	21	10	3	8	51637	36569.9	39602.5	80664.9	31868.2	25428.1	26051.6	58316.2	74960.6	82864.2	57447.5	19468.1	57937.5	52562	54547.3	99504.7	21289.1	50641.5	50639.7	50891.1	0.00285137	0.00285137
M387T292	387.284	292.178	0.771053	Luffariellolide	[M+H]+		C19901	Lipids and lipid-like molecules	Prenol lipids	Terpene lactones	292.801	22	7	2	8	12188	10401.9	14223.7	38774.3	10863.5	40467.3	22689.1	10788.1	12278.7	8356.88	17342.3	20035.2	12084.2	20210.6	5640.7	13418	13948.4	17066.1	16470.9	17060	0.0202712	0.0202712
M243T60	243.095	60.089	0.57916	Lumichrome	[M+H]+		C01727	Organoheterocyclic compounds	Pteridines and derivatives	Alloxazines and isoalloxazines	61.578	22	10	3	9	141270	427309	426296	53177.4	393748	96462.2	338577	821379	476492	354296	83543.1	495546	451238	600278	622415	173019	120421	392757	390186	392768	0.00379518	0.00379518
M262T438	262.147	437.524	0.838709	Lys-Asp	[M+H]+			Organic acids and derivatives	Carboxylic acids and derivatives	Amino acids, peptides, and analogues	439.192	15	8	2	5	9299	16697.4	57508.6	21908.9	46533.9	36484.7	36207.6	35562.9	30980.8	11932.5	16489.4	17985.8	43255.4	13466.2	58054.6	24192.3	15192.4	27915.1	27886.4	29522.5	0.0329247	0.0329247
M216T61	216.13	61.116	6.2452	Lys-Gln-Arg	[M+2H]2+			Organic acids and derivatives	Carboxylic acids and derivatives	Amino acids, peptides, and analogues	77.033	18	5	3	7	7314	12831.1	12977	8601.58	23652.1	28656.6	68382.9	10239.3	34782.4	11430.1	11666.3	11380.4	14570.9	14089.7	11204.7	14539.9	9096	33361	32631.5	32630.7	0.0128188	0.0128188
M404T458_1	404.227	458.414	7.61666	Lys-Glu-Lys	[M+H]+			Organic acids and derivatives	Carboxylic acids and derivatives	Amino acids, peptides, and analogues	461.101	15	7	1	7	7321	8517.14	17178.4	24505.3	19814.7	14558.2	32400.4	12028.6	12711.6	36096	20537	14575.8	18890.8	14202.3	13355.7	22666.2	6964.79	15609.9	16064.2	15605.8	0.016717	0.016717
M204T445	204.141	445.084	7.34242	Lys-Gly	[M+H]+			Organic acids and derivatives	Carboxylic acids and derivatives	Amino acids, peptides, and analogues	449.409	21	10	3	8	7310	24787.1	18588.3	53865.1	31807.3	52095.4	66096.3	13591.5	43181.6	29670.1	17423.6	25380.8	28849.5	23302.8	8285.89	55422.6	13574.8	28568	28562.6	22536	0.131085	0.131085
M260T363	260.206	363.433	7.97627	Lys-Leu	[M+H]+			Organic acids and derivatives	Carboxylic acids and derivatives	Amino acids, peptides, and analogues	364.135	22	10	3	9	63409	48316.8	134265	233744	67902.6	289691	460876	50642.9	101953	185516	97075.3	144912	101571	58811.3	28622.9	91539.3	73617.1	88668.3	91885.8	91935.3	0.020611	0.020611
M403T174_1	403.304	173.732	2.33163	Lys-Lys-Lys	[M+H]+			Organic acids and derivatives	Carboxylic acids and derivatives	Amino acids, peptides, and analogues	174.473	13	6	1	6	6935	10054.7	18904.3	5474.38	12761.5	10182	24345.4	16869.4	22124.4	17078.5	10304.8	12988.5	18429	6999.33	23365.8	7133.18	18561.9	14355.3	13616.4	13632.2	0.0304382	0.0304382
M278T367	278.161	367.257	6.88442	Lys-Met	[M+H]+			Organic acids and derivatives	Carboxylic acids and derivatives	Amino acids, peptides, and analogues	374.814	31	10	3	8	6701	11772.7	11725.8	35634.4	17305.9	45737.6	31624.4	18784.9	16748.1	6439.93	21285.5	16814.6	22784.5	34522.6	15290.2	12420	26670.1	16906.1	16904.5	17500.4	0.0200878	0.0200878
M294T349	294.188	349.472	1.27998	Lys-Phe	[M+H]+			Organic acids and derivatives	Carboxylic acids and derivatives	Amino acids, peptides, and analogues	362.746	23	10	1	7	9952	10365.3	18431.6	41210.3	18429.3	48034.3	55708.9	11754	19262.6	32008.3	17342.9	18329.7	19243.4	14925	8672.15	13200.2	12346.2	13399.8	13312.4	12346	0.0449202	0.0449202
M203T376_1	203.111	376.034	6.86237	Lys-Phe-Lys	[M+2H-NH3]2+			Organic acids and derivatives	Carboxylic acids and derivatives	Amino acids, peptides, and analogues	376.512	13	6	1	6	48143	5666.06	7069.9	10056.1	8076.96	64455.9	8655.34	97897.7	148808	9935.2	39960.8	5675.9	62503.5	9098.83	4046.29	66285.8	7247.83	34901.9	32974.9	18731.2	0.30595	0.30595
M244T415_1	244.172	414.78	6.68425	Lys-Pro	[M+H]+			Organic acids and derivatives	Carboxylic acids and derivatives	Amino acids, peptides, and analogues	417.046	17	9	1	7	33823	61038.7	73138.6	129088	119678	131672	221976	49938.5	53782.6	136415	58683.4	32924.7	64171.9	48382.1	32062.5	55208.7	30018.5	55556.3	56476.6	55544.3	0.00957489	0.00957489
M248T429	248.168	428.832	8.75989	Lys-Thr	[M+H]+			Organic acids and derivatives	Carboxylic acids and derivatives	Amino acids, peptides, and analogues	432.005	18	9	1	8	11997	10308.4	13477.9	70546.5	30975.1	62044.9	48770.2	15274.7	68178.2	32047	42282.2	21298.4	26472.7	18153.1	10780.4	25801.2	16636.8	22552.3	23054	22918.2	0.01136	0.01136
M246T389_1	246.188	389.276	9.03617	Lys-Val	[M+H]+			Organic acids and derivatives	Carboxylic acids and derivatives	Amino acids, peptides, and analogues	390.8	18	9	1	8	40483	29288.5	29371	158534	65553.1	236542	122742	27823.6	64984.6	67539.1	64981.4	51831.4	49763.3	35500.6	21264	52951.8	52497.4	56271.4	56257.6	55258.3	0.0103874	0.0103874
M451T39	451.333	38.562	4.45169	Madecassic acid	[M+H-3H2O]+			Lipids and lipid-like molecules	Prenol lipids	Triterpenoids	42.875	16	7	1	8	270541	101604	71701.2	59176.6	418818	66254.8	81222.3	203200	38678.8	50230.3	807963	55148.5	75452.3	90105.3	41691.1	146767	100054	492901	333078	496859	0.211903	0.211903
M365T387	365.116	386.683	7.39932	Maltose	[M+Na]+	HMDB0000163	C00208	Organic oxygen compounds	Organooxygen compounds	Carbohydrates and carbohydrate conjugates	399.784	20	9	1	7	1118826	146460	67508.2	462369	3.64768e+06	456503	254031	41110.8	98487.6	66436	82645.3	87288	118469	134248	60428.3	281258	92911.9	485603	468514	485064	0.0202503	0.0202503
M527T426_1	527.167	426.311	2.30066	Maltotriose	[M+Na]+	HMDB0001262	C01835	Organic oxygen compounds	Organooxygen compounds	Carbohydrates and carbohydrate conjugates	429.345	13	8	1	3	57947	46417	22202.1	17567.4	20191.1	16664.2	16954.7	45451.6	201203	31698.8	71081.2	113510	55880.2	30527.7	70451.1	19833.6	157489	85494.5	83361.8	83354.3	0.0146719	0.0146719
M405T145	405.067	145.305	2.71918	Mangiferin	[M+H-H2O]+		C10077	Organoheterocyclic compounds	Benzopyrans	1-benzopyrans	147.657	16	7	2	7	4573	65866.3	66377.2	59480.7	68830.3	137635	67132.5	66091.8	61171.2	149095	57919.6	53051.7	61389.6	56798.9	47366.2	57616.2	54022.1	59658	60447.8	60840.5	0.00998554	0.00998554
M411T292_1	411.195	291.584	2.93388	Mangostine	[M+H]+	HMDB0035796	C10080	Organoheterocyclic compounds	Benzopyrans	1-benzopyrans	292.327	16	7	1	7	6668	11551.3	13709.9	19215.8	11069.6	14736.8	17689.5	18835.2	14770.1	21418.6	22177.1	14617.4	15255	14925.7	21224.8	11887.5	18697	18168.9	18716.6	18173.4	0.01716	0.01716
M417T221	417.286	221.16	2.02623	Manoalide	[M+H]+		C17156	Lipids and lipid-like molecules	Prenol lipids	Terpene lactones	222.865	17	8	1	8	22616	52501	88526.6	24300.1	47807.3	49199.4	82554.8	86741.7	90336.2	74344.4	26501.7	70621	49206.2	31430.7	76658.3	21482.2	34547.9	51630.4	50571	51631.2	0.0119332	0.0119332
M363T259	363.142	259.32	0.934513	Marbofloxacin	[M+H]+			Organoheterocyclic compounds	Quinolines and derivatives	Quinoline carboxylic acids	261.752	17	7	3	7	7363	7946.56	10752.9	12254.4	14207.8	18348.5	6812.02	15976.2	13824	16884.3	19926.3	8981.55	12133.2	9336.7	14078.1	12853.6	8262.8	12611.5	12211.6	12211.4	0.0187091	0.0187091
M383T219_1	383.213	218.67	8.20213	Maresin 1	[M+Na]+			Lipids and lipid-like molecules	Fatty Acyls	Fatty acids and conjugates	220.749	20	9	1	5	9659	33535.7	52854.5	173635	174407	90408.5	50813.5	38551.6	43992.1	286623	116163	37851	60214.5	203986	48379.9	10843.5	47069.9	46025.8	46025.8	46078.3	0.000657812	0.000657812
M359T444	359.136	444.15	1.23197	Matairesinol	[M+H]+	HMDB0035698	C10682	Lignans, neolignans and related compounds	Furanoid lignans	Tetrahydrofuran lignans	450.822	13	5	1	6	41515	541629	388625	569680	478183	460619	303400	692083	641888	355190	631620	482587	527401	619442	516578	438410	138491	403125	402113	389961	0.0183877	0.0183877
M409T220_1	409.253	220.156	5.92793	Medroxyprogesterone 17-acetate	[M+Na]+		C08150	Lipids and lipid-like molecules	Steroids and steroid derivatives	Pregnane steroids	221.833	14	5	1	6	18782	6132.44	23482.6	14619.2	5055.83	12014.2	20639.9	75131.2	26112.6	42108.9	24888.5	17928.1	28171.5	23458.4	11942.5	63708.8	17898.8	21995.6	16363.3	21976.9	0.161418	0.161418
M242T277	242.108	276.824	0.139059	Mefenamic acid	[M+H]+	HMDB0014922	C02168	Benzenoids	Benzene and substituted derivatives	Benzoic acids and derivatives	278.956	22	10	3	9	466677	128625	470584	271042	252830	179648	352753	243969	899550	401711	235943	355821	635237	306007	582511	417181	281051	268686	292712	269548	0.0492056	0.0492056
M174T511	174.13	511.255	9.62752	Meperidine	[M+H-C3H6O2]+	HMDB0014597	C07128	Organoheterocyclic compounds	Piperidines	Phenylpiperidines	515.818	19	7	3	8	3499	20773.9	28757.4	7509.67	7617.03	21850.4	30558.3	17570	41606.7	47246.8	19781.1	24691.6	25035.5	22792.8	26273.4	6116.32	26182.3	22667.2	21039.6	20253.6	0.0577376	0.0577376
M507T406_1	507.144	406.468	5.14943	Metaflumizone	[M+H]+		C18523				407.73	12	8	1	3	27317	9327.41	9930.63	18096	20089.3	75549.8	11134.9	9232.67	34499.1	10764.8	5990.84	39799.1	31897.3	10551.7	37145.5	113185	10656.2	24379.5	25411.3	25415	0.0238061	0.0238061
M376T363_1	376.137	362.995	8.21854	Methanone, (3-chloro-1-naphthalenyl)(1-pentyl-1h-indol-3-yl)-	[M+H]+			Organoheterocyclic compounds	Indoles and derivatives	Naphthoylindoles	364.317	19	7	3	8	4855	2412.75	3970.77	15727.8	5271.08	12643.1	10970.4	7306.68	18902.4	18347.2	7910.16	6758.11	20388	9798.14	11877.8	4171.37	8560.28	6107.91	6908.06	6213.39	0.0678224	0.0678224
M166T368	166.059	367.538	0.346801	Methionine sulfoxide	[M+H]+		C02989	Organic acids and derivatives	Carboxylic acids and derivatives	Amino acids, peptides, and analogues	373.575	22	10	3	9	8618	27393	32065	30761.4	42576.3	89332.1	43607	25638.5	36383.3	61832.5	33062	32764.1	27363.4	29689.9	19718.7	46865.3	28581.7	30134.9	31979.1	31958.3	0.033766	0.033766
M599T157	599.265	157.393	3.83327	Methyl 5,6-diacetyloxy-10-hydroxy-2,4b,7,7,10a,12a-hexamethyl-12-methylidene-1,4,8-trioxo-4a,5,6,6a,9,10,10b,11-octahydronaphtho[1,2-h]isochromene-2-carboxylate	[M+Na]+			Lipids and lipid-like molecules	Steroids and steroid derivatives	Oxosteroids	168.523	12	7	1	4	4101	19400.9	29435.8	29499.7	28846.1	18454.2	29802.1	19353.2	26156.8	18002.9	38702.8	11617.2	19273.2	10396.1	11727	23240	27204.5	22896.3	21066.3	23274.5	0.052693	0.052693
M74T48	74.062	47.513	7.36585	Methylguanidine	[M+H]+	HMDB0001522	C02294	Organic nitrogen compounds	Organonitrogen compounds	Guanidines	60.674	13	5	3	5	44788	297646	16879.4	330575	10979.8	6287.19	21150.3	298609	12788.4	182030	9153.01	310932	9473.41	315654	325879	7823.42	319703	19704.4	20074.1	19709.8	0.0106867	0.0106867
M190T107	190.094	106.619	2.69418	Methyl indole-3-acetate	[M+H]+	HMDB0029738	C20635	Organoheterocyclic compounds	Indoles and derivatives	Indolyl carboxylic acids and derivatives	109.937	14	5	3	6	11577	24039.9	9383.17	53735.8	13855.1	14154.3	16920.2	44080.4	32489.6	41382.3	42197.9	38348.7	22583	24231.3	28403.3	10286.9	29293.4	18982.3	17715.3	18375.8	0.0345185	0.0345185
M196T39	196.103	38.949	1.73421	Methyltyrosinate	[M+H]+	HMDB0029217	C03404	Organic acids and derivatives	Carboxylic acids and derivatives	Amino acids, peptides, and analogues	44.303	21	10	3	8	49511	51723.2	135005	93947.7	96291.3	49255.3	116167	115619	129241	93751.4	89601.8	150897	92634.4	108440	74934.3	167408	76237.3	87236	87234.8	86402.6	0.00552929	0.00552929
M419T200_1	419.228	199.693	6.42568	Met-Ile-Arg	[M+H]+			Organic acids and derivatives	Carboxylic acids and derivatives	Amino acids, peptides, and analogues	201.442	15	8	1	6	11058	18235.6	23764.8	14874.6	17100	13551.1	22997.9	28446.5	14479.7	21496.4	24951.8	14805.4	18452.1	22898.1	23977.1	29485.8	13194.6	18545	18281.3	18547.6	0.00829006	0.00829006
M419T286	419.256	285.963	0.65737	Met-Leu-Arg	[M+H]+			Organic acids and derivatives	Carboxylic acids and derivatives	Amino acids, peptides, and analogues	292.327	11	4	1	6	2144	6124.68	8951.18	12112.9	8774.63	6674.86	16386.4	9619.22	10396.1	12298.7	11473.8	16859.1	9332	9935.48	8711.51	16118.8	9990.5	9691.81	9580.35	9691.01	0.00664165	0.00664165
M281T193	281.108	192.593	9.34989	Met-Met	[M+H]+			Organic acids and derivatives	Carboxylic acids and derivatives	Amino acids, peptides, and analogues	193.874	10	5	0	5	6508	6476.8	12742.9	14504.9	7382.93	12494.7	21468.1	12294.7	17577.1	7805.36	13046.4	14872.8	14264.7	9444.07	15344.4	7515.86	16545.3	13625.1	13903.7	13903.4	0.0116424	0.0116424
M437T36_1	437.205	36.327	5.10536	Met-Met-Arg	[M+H]+			Organic acids and derivatives	Carboxylic acids and derivatives	Amino acids, peptides, and analogues	36.361	14	9	1	4	87575	94617	107573	88417.5	87271.5	234539	58051	121650	112208	63462.2	100405	115764	65786.6	94308.7	68054.3	85556	116179	135696	135704	133408	0.00980651	0.00980651
M423T455_1	423.203	454.674	0.236495	Met(o)-Glu-Lys	[M+H]+			Organic acids and derivatives	Carboxylic acids and derivatives	Amino acids, peptides, and analogues	459.394	12	6	1	5	4418	8599.07	12240.8	19020	19751.4	12465.7	14655.5	7755.79	9721.15	22197.8	13296	10373.4	11277.9	10517.2	9473.56	14124.8	8318.86	11606.5	11866.8	11533.2	0.0150232	0.0150232
M227T369	227.132	369.101	4.01515	Metyrapone	[M+H]+	HMDB0015146	C07205	Organic oxygen compounds	Organooxygen compounds	Carbonyl compounds	370.426	17	7	1	8	36953	17512.9	6124.75	54810.5	40409.3	15301.4	97606.5	32863.7	33121.5	67253.5	45192.7	21843.5	23902.8	42239.6	36914.5	17167.6	39499	35055.4	33202	35055.5	0.0310726	0.0310726
M184T330	184.096	329.973	6.6735	M-fluoro-dl-phenylalanine	[M+H]+			Organic acids and derivatives	Carboxylic acids and derivatives	Amino acids, peptides, and analogues	336.57	17	7	2	8	5678	4186.31	6067.5	9221.38	1454.1	11040.5	2791.91	9424.59	12888.4	4720.56	13656.4	19763.2	9167.69	14253.4	11757.9	4551.92	9752.51	13069.7	13058.6	14486.8	0.0606719	0.0606719
M498T398_1	498.291	398.2	2.40253	Microcystin lr	[M+2H]2+		C05371	Organic acids and derivatives	Peptidomimetics	Hybrid peptides	399.73	12	6	1	5	2701	10905	17177.7	15117.4	13283.8	15454.5	25942.9	18908.4	7752.39	22700.7	13812	13185.5	20673.3	19074.5	13941.2	13156	15493.5	15548.9	16100.6	16103.7	0.0200659	0.0200659
M399T431	399.225	430.614	5.01494	Mitragynine	[M+H]+	HMDB0041933	C09226				432.617	15	7	1	6	5333	3921.31	13549.3	22528.9	4621	13180.4	17463.1	13372.7	10514.5	19578.7	19045.7	8449.02	18826.4	13993.5	13715.5	12967.7	15804.6	15425.4	14048.5	15384.9	0.0523981	0.0523981
M693T128_2	693.403	127.97	5.08908	Monensin	[M+Na]+		C06693	Lipids and lipid-like molecules	Fatty Acyls	Fatty acids and conjugates	131.275	11	5	1	5	48307	33315.9	37402.5	67794.2	19835.5	4700.11	35037.3	88419.4	68328.1	61809	180131	330551	108437	52453.3	239090	23067.4	115345	80414	80909.1	80909.2	0.00354053	0.00354053
M257T32_1	257.219	31.78	1.88346	Monolaurin	[M+H-H2O]+			Lipids and lipid-like molecules	Glycerolipids	Monoradylglycerols	47.563	19	9	3	6	417922	110179	68604.4	95163.6	102403	113118	46439.3	81839.9	23651.7	87017.2	38309.3	52072.3	72093.7	66517	70284	43319.1	51958.6	98489	96038.3	98502.7	0.0145264	0.0145264
M353T34_1	353.28	34.376	4.15389	Monolinolenin (9c,12c,15c)	[M+H]+			Lipids and lipid-like molecules	Fatty Acyls	Lineolic acids and derivatives	35.068	18	8	1	9	680050	264128	264477	167522	281709	714229	262438	290541	329360	184174	353693	224862	1.05417e+06	346451	200483	202669	153862	366547	357699	357595	0.0142504	0.0142504
M311T158_1	311.266	158.019	9.2537	Monopalmitolein (9c)	[M+H-H2O]+			Lipids and lipid-like molecules	Glycerolipids	Monoradylglycerols	159.316	17	9	1	7	28258	23777.4	39928.1	29542.9	20561.4	18956.1	16587.7	44119.8	122719	51857.8	37782.7	32554	32035.8	21450.5	16792.9	61932.7	20559.4	36813.5	39645.7	39660	0.0423516	0.0423516
M568T441	568.2	440.579	5.68028	Montelukast	[M+H-H2O]+						453.591	13	7	1	3	9659	25384.3	23468	33850.7	27151	53166.4	21722.9	33162.3	51934.2	36668.3	33507.2	27213.8	28472.8	20282.3	35101	119796	22598.4	37297.2	35545.1	35538.1	0.0280557	0.0280557
M402T496	402.172	495.869	6.66919	Moxifloxacin	[M+H]+	HMDB0014363	C07663	Organoheterocyclic compounds	Quinolines and derivatives	Quinoline carboxylic acids	499.644	14	8	1	5	9765	10820.7	17699.8	48494.6	58023.4	6409.31	46394.4	17346.2	2668.49	50908.7	15710	8007.68	12661.6	20633.5	16211.5	5997.66	7207.64	21778.3	25172.5	21823.2	0.0849214	0.0849214
M569T452	569.183	452.217	7.86854	Mulberroside a	[M+H]+			Phenylpropanoids and polyketides	Stilbenes	Stilbene glycosides	456.121	11	6	1	4	30675	16034.8	10140.1	14018.4	24411.6	206701	9532.88	8201.28	60264.1	10454.5	7696.53	43444.1	24954.5	11693.4	26823.6	20561.4	17240.7	31988.8	31988.4	32126.5	0.00248446	0.00248446
M435T316	435.195	316.026	1.01302	Mundulone	[M+H]+			Phenylpropanoids and polyketides	Isoflavonoids	Isoflavans	329.525	14	5	2	7	6179	10945	11489	19635.8	12254.1	9985.42	28018.4	10807.3	11705.3	15989.1	8471.6	13064.7	12319.3	13656.2	20804.6	14685.7	6629.53	13784.7	15122.4	13235.7	0.0690794	0.0690794
M239T35	239.245	34.6965	6.4389	Muscone	[M+H]+	HMDB0034181		Organic oxygen compounds	Organooxygen compounds	Carbonyl compounds	53.555	16	5	2	8	20997	25655.6	21076.9	47218.9	23821.7	19892.1	8493.7	23279.9	21763.8	24913.8	42636.8	71848.1	57388.9	44604.7	48150.1	47457.5	30977.5	36716.1	39298.7	43505.1	0.086011	0.086011
M434T367	434.206	366.605	3.23909	Mycophenolate mofetil	[M+H]+	HMDB0014826	C07908	Organoheterocyclic compounds	Isocoumarans	Isobenzofuranones	367.296	15	6	2	7	229820	923991	1.37555e+06	430327	1.19091e+06	668146	1.07095e+06	937448	1.7573e+06	595816	1.00766e+06	859841	555444	650082	404402	810552	1.2968e+06	759651	775328	775372	0.0117698	0.0117698
M384T284	384.284	283.96	0.112885	Myriocin	[M+H-H2O]+		C19914	Lipids and lipid-like molecules	Fatty Acyls	Fatty acids and conjugates	285.091	11	7	1	3	3009	1190.63	1082.53	7616.39	1049.42	737.594	852.638	4016.39	1121.69	1746.09	8952.64	3155.06	2565.26	5344.59	3839.58	5962.98	1758.87	3054.75	3143.93	3142.38	0.0163947	0.0163947
M372T175_1	372.324	174.962	6.41383	Myristoyl-l-carnitine	[M+H]+	HMDB0005066		Lipids and lipid-like molecules	Fatty Acyls	Fatty acid esters	175.448	17	8	1	8	108846	15811.2	10094.6	34103.2	19316.2	17236.2	16740.8	111024	32110.8	16055.1	123801	56329.7	61107.9	38140.3	32672.9	288927	12267.5	73640	73641.1	72726.8	0.00719398	0.00719398
M492T33	492.496	33.0735	2.68589	N-(1,3-dihydroxyoctadec-4-en-2-yl)tetradecanamide	[M+H-H2O]-			Lipids and lipid-like molecules	Sphingolipids	Ceramides	33.808	12	5	1	6	162114	93255.4	99121	54008.1	97526.7	24896.1	123175	106009	132878	66885	80327	83463.2	65523	118625	67025.7	188295	54055	83652.6	84184.8	81381.2	0.0179237	0.0179237
M334T235	334.246	235.365	9.40579	N-3-oxohexadec-11z-enoyl-l-homoserine lactone	[M+H-H2O]+			Organic acids and derivatives	Carboxylic acids and derivatives	Amino acids, peptides, and analogues	243.039	13	8	1	4	4714	33461.1	46318.1	34659	34025.4	29794.8	36065.1	39031.2	35792.1	22334.7	21530.7	18626.5	24530.1	28023.8	23327.3	8112.48	38584.2	41552.9	33124.7	41510.8	0.125328	0.125328
M211T384	211.114	383.8	4.28059	N-(4-chlorophenyl)-4-piperidinamine	[M+H]+			Organic nitrogen compounds	Organonitrogen compounds	Amines	384.422	19	8	3	8	17649	19130.6	13326.8	14373.4	13133.7	14969.6	16830.3	33200.8	58655.5	22187.3	24730.2	50797.4	30276.6	13445.7	25065.6	17652.5	43085.7	21315.4	22406	21335.6	0.0287723	0.0287723
M255T392	255.091	392.329	0.495131	N-(4-fluorobenzoyl)-5-amino-1h-indole	[M+H]+			Benzenoids	Benzene and substituted derivatives	Benzoic acids and derivatives	394.967	16	9	1	6	8519	14295.8	15506.4	28668.6	28474.1	22421.5	27948.5	14745.7	6551.57	19717	46875	14924	15888.8	20547.1	13003.2	17154.5	17366.1	19344.9	20043.5	20059.9	0.0205969	0.0205969
M143T370	143.123	370.409	3.52236	N-(4-piperidinyl)acetamide	[M+H]+						377.307	20	8	3	8	17270	30656.1	6386.49	24061.1	9693.56	127062	30936	4782.26	10149.1	11105.3	6827.84	4387.22	3717.68	13990.1	3061.5	16582.6	6130	19575.3	18683.3	19572.1	0.0266666	0.0266666
M200T328	200.135	328.499	6.14404	N5-(1-imino-3-butenyl)-l-ornithine	[M+H]+			Organic acids and derivatives	Carboxylic acids and derivatives	Amino acids, peptides, and analogues	329.979	19	8	3	8	6578	19311.5	26282	32067.6	35746.4	12767.7	36994.9	21460.4	20216.7	29967.3	36940.9	17182.2	12966.1	17908	23578.6	14764.6	20088.1	24130.5	25156.8	24129	0.0242301	0.0242301
M150T106	150.082	106.148	3.09396	N6-methyladenine	[M+H]+	HMDB0002099	C08434	Organoheterocyclic compounds	Imidazopyrimidines	Purines and purine derivatives	108.419	19	9	3	7	34990	70125.6	85333.2	331144	121381	87578.7	85579.1	61064	95160.1	104128	196760	68311	98311.7	164861	46361.5	180207	90427.8	112894	112434	111534	0.00616224	0.00616224
M189T524	189.165	523.683	7.6664	N6,N6,N6-Trimethyl-L-lysine	[M+H]+	HMDB0001325	C03793	Organic acids and derivatives	Carboxylic acids and derivatives	Amino acids, peptides, and analogues	536.385	30	10	3	9	52333	121646	140214	104783	41274.8	1.00917e+06	95882.2	126113	199163	174936	56506.8	323580	176818	25523.8	47272.1	120668	179075	211400	220326	222518	0.0270031	0.0270031
M214T38	214.186	37.644	6.82533	N-(9-oxodecyl)acetamide	[M+H]+			Organic acids and derivatives	Carboxylic acids and derivatives	Carboxylic acid derivatives	39.582	23	10	2	9	103413	12800	9211.9	11393.8	10645.3	10368.5	12294.9	10148.1	25563.1	11721	2962.31	24890.8	17516.9	13063.7	10945	11137	12801.8	45625	28168.3	27104.1	0.309209	0.309209
M145T291	145.138	291.465	2.90613	N-acetylcadaverine	[M+H]+	HMDB0002284					292.138	22	10	3	9	1571648	1.31358e+06	1.39379e+06	39707.6	2.18686e+06	1.28015e+06	9.39899e+06	1.43439e+06	697555	342760	31572.8	152335	1.76838e+06	117073	626828	752521	175720	1.75577e+06	1.76989e+06	1.75584e+06	0.00461983	0.00461983
M269T294	269.12	294.166	3.53611	N-acetylcarnosine	[M+H]+	HMDB0012881		Organic acids and derivatives	Peptidomimetics	Hybrid peptides	299.732	19	9	1	9	28298	19907.5	13166.9	15584.4	19801.6	119852	12135.4	6732.09	8209.04	10399.5	12211	7804.1	7438.74	11280	6445.35	9739.9	15432.9	27379.2	24287.7	27368.4	0.0676322	0.0676322
M204T164	204.076	163.926	8.84979	N-acetyl-d-galactosamine	[M+H-H2O]+	HMDB0000212	C01074	Organic oxygen compounds	Organooxygen compounds	Carbohydrates and carbohydrate conjugates	164.605	15	6	3	6	45961	4305.22	195283	10711.8	3438.72	14927.8	4669.41	12262.1	73195.4	17799.3	30624.9	14830.1	8716.31	11729.9	18203	144255	3270.94	7968.63	7873.19	7892.25	0.00638419	0.00638419
M204T161	204.093	160.772	1.20327	N-acetyl-d-glucosamine	[M+H-H2O]+	HMDB0000215	C00140	Organic oxygen compounds	Organooxygen compounds	Carbohydrates and carbohydrate conjugates	162.615	21	10	2	9	45961	28539.2	202117	43448	34542.9	27533	39279.8	96488.5	87251.9	31505	43460.7	29226.6	62299.4	64699.1	35874.7	160439	32015.9	55241.9	55275.4	52303.1	0.0314423	0.0314423
M344T38_4	344.324	38.299	3.86578	N-acetyldihydrosphingosine	[M+H]+			Lipids and lipid-like molecules	Sphingolipids	Ceramides	42.239	15	7	1	7	208986	194764	217533	261914	135886	5581.4	152620	104676	204501	208539	221849	166687	140056	252851	164787	175567	153829	181861	176540	181855	0.0170502	0.0170502
M160T312	160.102	311.608	0.88633	N-acetyl-dl-valine	[M+H]+	HMDB0011757		Organic acids and derivatives	Carboxylic acids and derivatives	Amino acids, peptides, and analogues	313.511	21	9	3	9	25756	22413.3	6452.39	16593.6	18910.6	40273.4	44957.4	46612.9	100617	18723.5	20352.3	53497.7	107176	26363.2	83278.8	60221.1	39000.6	38535.2	39935.3	38532.1	0.0207493	0.0207493
M154T146	154.103	146.317	2.77123	N-acetylhistamine	[M+H]+	HMDB0013253	C05135	Organic acids and derivatives	Carboxylic acids and derivatives	Carboxylic acid derivatives	147.547	17	6	3	8	315502	89776.3	1.36234e+06	20953.6	362508	1.21397e+06	20446.1	143522	1.48583e+06	24340.7	20145	101243	39711.7	25427.4	213832	30726.2	110653	310571	309018	309023	0.00289269	0.00289269
M198T317	198.094	316.528	2.57384	N-acetylhistidine	[M+H]+	HMDB0014748	C02997	Organic acids and derivatives	Carboxylic acids and derivatives	Amino acids, peptides, and analogues	317.829	21	9	3	9	389066	369435	139250	91296.5	128800	193905	74640.3	318697	996105	151394	107115	685296	390465	120156	309079	141012	366205	228257	232688	228309	0.0110708	0.0110708
M269T330	269.131	329.536	1.19106	N-acetyl-l-carnosine	[M+H]+			Organic acids and derivatives	Peptidomimetics	Hybrid peptides	333.601	11	4	1	6	51486	16272.2	4587.55	59992.3	8533.72	115106	11423.2	7511.12	9444.98	10816.5	9143.8	7449.19	8320	18318.9	9307.16	14221.5	9713.14	41822.7	45793.9	41842.8	0.0529981	0.0529981
M131T315	131.122	315.336	6.00724	N-acetylputrescine	[M+H]+	HMDB0002064	C02714	Organic acids and derivatives	Carboximidic acids and derivatives	Carboximidic acids	316.727	22	10	3	9	130072	120772	448207	76557.5	117683	1.05974e+06	61373.9	191430	427119	104266	108883	536798	340222	80909.3	212038	214124	361129	245484	243184	245468	0.00540623	0.00540623
M368T408	368.221	407.707	2.20208	N-acetyl-s-farnesyl-l-cysteine	[M+H]+			Lipids and lipid-like molecules	Prenol lipids	Sesquiterpenoids	418.252	16	8	3	4	6651	8361.95	1245.03	15150	7417.71	9755.16	28195.9	17978.6	14980.8	12948.8	14542.3	81592.5	4823.69	10461.7	31474.7	6902.33	55145.8	16893.5	16346.7	16893.6	0.0188943	0.0188943
M306T37_1	306.287	36.982	8.49927	N-acetylsphingosine	[M+H-2H2O]+			Lipids and lipid-like molecules	Sphingolipids	Ceramides	37.691	17	9	1	7	389261	375355	345679	221938	520969	336831	288277	218655	200768	165531	385967	338518	382099	220047	312447	298092	258872	283510	328265	328193	0.0824025	0.0824025
M296T290	296.078	290.038	8.18115	N-acetylsulfamethoxazole	[M+H]+	HMDB0013854	C13061	Benzenoids	Benzene and substituted derivatives	Benzenesulfonamides	292.692	21	9	3	9	4441	1654.97	2392.8	9526.34	2741.08	4502.21	2279.04	5423.03	8367.1	3792.81	7672.51	5923.45	2755.61	4622.14	12244	5228.53	3784.91	3430.69	3651.42	3415.18	0.0377659	0.0377659
M180T37	180.107	36.998	5.5861	N-acetyltyramine	[M+H]+			Benzenoids	Phenols	1-hydroxy-2-unsubstituted benzenoids	43.432	22	10	3	9	39684	66786.6	109001	265137	87439.2	58350.3	101572	87078.4	71481.1	105366	62687.4	175621	99101	112546	111285	67047.7	83695.9	104847	104868	109052	0.0227924	0.0227924
M457T36_1	457.312	36.317	6.15384	Nakijiquinone h	[M+H]+			Lipids and lipid-like molecules	Prenol lipids	Quinone and hydroquinone lipids	36.99	14	5	2	7	78246	59016.8	62268.5	133701	46500.4	36018	48491.5	81676.5	82068.6	49489.9	118650	37196.4	169208	149201	48906.9	112233	44173.7	150689	173126	149653	0.0840364	0.0840364
M189T384_2	189.13	383.832	6.78728	N-alpha-acetyl-l-lysine	[M+H]+		C12989	Organic acids and derivatives	Carboxylic acids and derivatives	Amino acids, peptides, and analogues	384.512	22	10	3	9	279389	231914	177065	144740	247795	173818	253703	568730	963544	290709	323553	849452	473286	128539	353093	236267	647899	335072	360576	336246	0.0418586	0.0418586
M175T382_2	175.113	381.938	7.34829	N-.alpha.-acetyl-l-ornithine	[M+H]+	HMDB0003357	C00437	Organic acids and derivatives	Carboxylic acids and derivatives	Amino acids, peptides, and analogues	383.128	20	10	1	9	62879	64455.1	34152.4	32835.8	76998	25260.4	35723.2	107376	185979	92766.5	128047	230688	234490	48075	133495	27624.5	238960	85347.5	90277.5	90391.5	0.032477	0.032477
M256T394	256.125	393.731	2.63739	N-.alpha.-(tert-butoxycarbonyl)-l-histidine	[M+H]+			Organic acids and derivatives	Carboxylic acids and derivatives	Amino acids, peptides, and analogues	396.307	18	9	2	7	43028	38350.2	17871.4	61859.8	87405.6	12374.7	20081.8	27273.9	24968.1	16812	103924	21106.5	26450.2	31437.8	23944.2	28574.2	46329.8	36145.8	38472.7	36009.3	0.0375461	0.0375461
M247T364	247.175	364.178	0.467059	N-.alpha.-(tert-butoxycarbonyl)-l-lysine	[M+H]+			Organic acids and derivatives	Carboxylic acids and derivatives	Amino acids, peptides, and analogues	373.732	20	7	3	7	63901	125614	50005.5	46927.2	119622	78054.7	78593.9	114009	271703	81625.7	115726	235076	143372	55794.1	140750	54947.6	220853	108807	110316	108808	0.00796817	0.00796817
M238T406	238.115	406.386	4.96849	N-.alpha.-(tert-butoxycarbonyl)-l-proline	[M+Na]+			Organic acids and derivatives	Carboxylic acids and derivatives	Amino acids, peptides, and analogues	408.936	19	9	3	7	15158	16800.6	9267.93	41744.5	31871.2	6801.06	11491.2	27451.7	18597.2	10217.4	37846.3	20819.7	28374.8	31910.8	22521.7	20179.1	32327	23086.7	22878.8	22812.8	0.00623529	0.0062353
M240T318_1	240.13	318.038	0.181792	N-.alpha.-(tert-butoxycarbonyl)-l-valine	[M+Na]+			Organic acids and derivatives	Carboxylic acids and derivatives	Amino acids, peptides, and analogues	320.401	17	10	1	6	70155	66912.4	28403.8	121881	91556.9	13922.1	61091.8	99819.9	49588.3	9810.69	113491	60680.2	90249	101030	29893.5	41497.4	158154	104488	91064.6	104497	0.0775143	0.0775143
M233T475	233.157	474.524	6.61855	N-desbutylbupivacaine	[M+H]+	HMDB0060725		Organic acids and derivatives	Carboxylic acids and derivatives	Amino acids, peptides, and analogues	478.253	18	8	3	7	15514	15015.2	18478.7	36040.3	63003.6	11574.9	60262.6	49026.3	12055.3	54040.6	31012.6	7151.15	24936.4	22364.6	22377.4	25922.9	9211.1	24863.6	24827.4	25258	0.00956085	0.00956085
M371T416	371.203	415.929	9.23554	N-desethylsunitinib	[M+H]+			Organoheterocyclic compounds	Indoles and derivatives	Indolines	424.04	17	7	2	5	31696	12349	11232	202090	14897.1	9728.26	14983.4	18191.2	2381.94	15022.6	187595	34905	42107.7	70269	15987.5	36452.3	69088.8	42021.1	39875.6	39738.9	0.0315693	0.0315693
M464T159_1	464.43	158.679	6.80386	N-(dodecanoyl)sphing-4-enine	[M+H-H2O]+	HMDB0004947		Lipids and lipid-like molecules	Sphingolipids	Ceramides	160.058	11	8	1	2	7869	2524.87	1372.83	4152.21	2111.78	3010.19	2830.87	5612.97	22668.2	7663.56	4711.6	3487.32	3195.43	4325.04	2611.85	1014.3	9055.13	5457.87	5550.84	5457.24	0.00981234	0.00981234
M568T420	568.328	420.455	5.93126	Nelfinavir	[M+H]+	HMDB0014365	C07257	Organic acids and derivatives	Carboxylic acids and derivatives	Amino acids, peptides, and analogues	422.443	11	6	1	4	3205	6408.62	17663.6	11086.6	17448.8	12416.5	17389	12898.1	1459.47	35246.1	10778.9	10847.8	11721.5	10795.4	8282.26	13087.9	5466.84	11932.1	12742.3	11922.4	0.0385775	0.0385775
M446T294	446.146	294.091	6.31235	Neolinustatin	[M+Na]+		C08336	Organic oxygen compounds	Organooxygen compounds	Carbohydrates and carbohydrate conjugates	294.876	12	8	1	3	15882	35153.4	31292.3	48267.7	36692	45106.7	24412.8	27807.7	47192.6	39004.3	39710.6	35139.3	32363.5	48516.9	37779	47518.6	27568.7	31420.7	32498.8	31878.8	0.0169441	0.0169441
M681T193	681.38	193.343	4.64896	Neomenthyldiphenylphosphine oxide	[2M+H]+			Lipids and lipid-like molecules	Prenol lipids	Monoterpenoids	206.286	10	3	0	7	7777	13283.6	17276.6	16159.6	9194.56	10095.7	11499	16059.5	31312.1	30257.5	13731.4	36781.9	16305.3	10551.7	19052.2	14671.9	9922.63	18439	17963.6	18439.8	0.0150287	0.0150287
M429T199_1	429.293	199.28	2.47982	Neoruscogenin	[M+H]+			Lipids and lipid-like molecules	Prenol lipids	Triterpenoids	202.846	16	8	1	6	37956	30311.8	41599.8	20913.6	126876	156499	119566	13830.8	16008.2	82741.8	12621.6	10814.2	24734.5	16988.5	9601.17	22250.3	8391.1	43869.9	43863.3	42297.8	0.0208973	0.0208973
M211T350	211.111	349.654	9.03116	N.epsilon.-acetyl-l-lysine	[M+Na]+	HMDB0000206	C02727	Organic acids and derivatives	Carboxylic acids and derivatives	Amino acids, peptides, and analogues	352.629	22	10	2	9	12483	43086	53623.3	35676.6	48233.4	86311.7	60800.7	38130.3	100462	69809.1	57501.7	62005.2	45704.3	28519.8	49998	56075.9	44157.4	14145.3	26279.4	26479.5	0.316755	0.316755
M203T499	203.156	499.309	4.96166	Ng,ng-dimethyl-l-arginine	[M+H]+	HMDB0001539	C03626	Organic acids and derivatives	Carboxylic acids and derivatives	Amino acids, peptides, and analogues	517.226	30	9	3	8	37204	19590.6	169232	147133	265271	1.18932e+06	126558	234361	129408	450346	241728	504320	309376	190393	52679.5	85279.2	351151	154799	128088	202316	0.23246	0.23246
M123T63	123.059	62.54	1.69048	Niacinamide	[M+H]+	HMDB0001406	C00153	Organoheterocyclic compounds	Pyridines and derivatives	Pyridinecarboxylic acids and derivatives	63.332	22	10	3	9	192421	219664	257105	50454.1	157394	304120	145075	378028	154583	136342	214577	366797	370119	277212	268836	133907	350676	767722	774054	774043	0.00473139	0.00473139
M139T141	139.054	141.085	7.69589	Nicotinamide n-oxide	[M+H]+	HMDB0002730		Organoheterocyclic compounds	Pyridines and derivatives	Pyridinecarboxylic acids and derivatives	155.054	15	7	2	3	6407	11493.7	11199.8	15839.4	7085.87	18564.1	15436.3	16544.3	16772.9	15672.3	30902.1	10287.1	6068.49	6543.14	11640.4	8194.4	3723.55	10193.6	8603.07	8572.78	0.10163	0.10163
M124T224_2	124.043	223.7	6.30224	Nicotinate	[M+H]+	HMDB0001488	C00253	Organoheterocyclic compounds	Pyridines and derivatives	Pyridinecarboxylic acids and derivatives	225.399	22	10	3	9	394582	445827	1.01035e+06	355579	490139	233809	745487	781642	1.072e+06	566857	725641	824141	790886	462970	897792	516033	921378	570816	576034	570868	0.00523545	0.00523545
M540T195_1	540.26	195.197	3.67508	Nintedanib	[M+H]+			Organoheterocyclic compounds	Indoles and derivatives	Indolecarboxylic acids and derivatives	204.116	13	5	1	7	17168	7216.88	14972.4	5429.19	5987.63	8863.88	14192.4	7820.13	22244	25399.8	9203.62	8083.01	18445.5	7449.19	9488.96	13365.3	16734.2	15472.1	14654.6	15455.5	0.0307514	0.0307514
M484T34	484.486	33.716	5.47816	N-lauroyl-d-erythro-sphinganine	[M+H]+	HMDB0011758		Lipids and lipid-like molecules	Sphingolipids	Ceramides	33.765	11	6	1	4	72261	34283	39826.9	53120.1	44844.2	20592	67282.9	49608.6	53528	43160.5	42541.5	74765.6	94515.7	66767.6	72798.4	28606.9	35010.4	49097.9	50512.9	49712.7	0.0142548	0.0142548
M162T65_2	162.061	65.027	0.794181	N-methyl-l-glutamic acid	[M+H]+	HMDB0062660	C01046	Organic acids and derivatives	Carboxylic acids and derivatives	Amino acids, peptides, and analogues	66.804	21	9	3	9	1861785	3.09768e+06	401954	5.3171e+06	1.07025e+06	232476	8.44293e+06	4.96141e+06	5.35108e+06	972413	974907	6.89903e+06	1.13987e+07	9.28775e+06	1.76092e+07	1.57404e+06	1.10082e+07	5.22407e+06	5.28261e+06	5.22406e+06	0.00644628	0.00644628
M100T250	100.115	250.417	2.6315	N-methyl-l-isoleucine	[M+H-CH2O2]+			Organic acids and derivatives	Carboxylic acids and derivatives	Amino acids, peptides, and analogues	252.178	28	10	3	9	27113	16471.8	37945	7899.8	34623.9	5513.13	57076.5	10738.2	10893.7	79652.7	3332.77	16316.9	3045.84	7321.18	8080.03	1708.4	6775.53	16858.8	17069	16862.5	0.00710616	0.00710616
M206T350	206.146	350.401	6.66475	N-methylparoxetine	[M+H-C7H6O3]+			Organoheterocyclic compounds	Piperidines	Phenylpiperidines	351.205	14	6	3	5	13798	7162.89	81252.7	10447.4	22976.6	36765	7118.33	4843.66	6936.44	25636.7	26333.8	26093.2	5590.44	8349.12	6241.11	8126.73	5917.8	8251.16	6900.82	6836.82	0.108974	0.108974
M513T33_1	512.519	33.413	3.32663	N-myristoylsphinganine	[M+H]+	HMDB0011759		Lipids and lipid-like molecules	Sphingolipids	Ceramides	33.808	14	6	1	7	570504	271473	263816	503895	355886	83989.3	261986	161162	338873	214688	352754	574699	571869	536176	461365	189902	208559	376730	391590	376828	0.022402	0.022402
M204T372	204.096	371.661	7.0223	N,n'-diacetylchitobiose	[M+H-C8H15NO6]+	HMDB0003556	C01674	Organic oxygen compounds	Organooxygen compounds	Carbohydrates and carbohydrate conjugates	372.315	24	8	3	9	11764	12446.9	13633.7	9931.03	13777.6	17532.3	32722.2	27036.5	3640.3	13273.6	18336.7	27128	33715.5	10851.5	32415.6	49164	28415	19433.7	19717.1	19716.7	0.00833127	0.00833127
M217T39	217.162	38.9705	0.553643	N,n-diethyltryptamine	[M+H]+			Organoheterocyclic compounds	Indoles and derivatives	Tryptamines and derivatives	42.963	22	10	3	9	53115	89451.9	107536	121171	162406	79137.2	213179	181502	93323.6	106313	264688	111098	145745	89535.9	100755	97574.8	118525	112549	112545	111335	0.00623981	0.00623981
M146T250	146.122	250.37	2.15916	N,n-dimethyl-l-valine	[M+H]+			Organic acids and derivatives	Carboxylic acids and derivatives	Amino acids, peptides, and analogues	255.446	29	10	3	9	112892	66186.7	165202	26456.7	128735	23834.6	234683	43994.1	39136.9	324407	41950.4	70771.6	16974.8	31974.9	30429.2	6362.2	23763.5	66899.3	67802.7	67817	0.00778765	0.00778765
M101T380	101.063	380.432	7.31663	N-nitrosopyrrolidine	[M+H]+	HMDB0031642	C19285				380.743	22	10	3	9	99741	155005	204072	203200	223157	519100	306149	212507	199284	214669	169566	205821	197586	181721	118043	261433	171269	200434	207531	207561	0.0200128	0.0200128
M403T36_1	403.149	35.665	6.91036	Nobiletin	[M+H]+	HMDB0029540	C10112	Phenylpropanoids and polyketides	Flavonoids	O-methylated flavonoids	42.961	12	5	1	6	282412	140316	2460.53	26908	74494.6	32597.8	71895	43462.5	117862	35700.9	37336.3	95289	102843	42205.6	17795.1	13141.4	66872.4	98608	96554.2	97180.9	0.0108012	0.0108012
M426T170_2	426.419	170.476	6.3269	N-octanoylsphingosine	[M+H]+			Lipids and lipid-like molecules	Sphingolipids	Ceramides	171.106	17	7	2	8	89844	6868.25	20855.2	52443.3	4965.83	5023.4	3056.88	21053.4	67142.2	30108.5	50488.2	25179.4	43383.5	35102	38361.6	14491.8	40780.3	78145.8	45893.2	44680.2	0.3375	0.3375
M412T173	412.401	172.88	0.17373	N-octylsphingosine	[M+H]+			Organic nitrogen compounds	Organonitrogen compounds	Amines	176.364	16	7	1	8	37087	12111.6	27269.3	103382	12207.3	6659.93	3020.69	41694.2	66989.8	49388.9	106231	39751.6	70810.9	51351.5	72730.2	32322.8	42370.1	47983.5	47965	50311	0.0276738	0.0276738
M326T36	326.316	35.6835	9.06438	N-oleoylethanolamine	[M+H]+	HMDB0002088	C20792	Organic nitrogen compounds	Organonitrogen compounds	Amines	36.33	16	6	2	8	271722	154387	232261	113181	147840	111055	148667	178699	264148	167482	161018	181004	248629	478072	123922	211145	102395	214839	190912	190372	0.0703165	0.0703165
M169T40	169.081	39.525	0.939667	Norharmane	[M+H]+	HMDB0012897	C20157	Organoheterocyclic compounds	Indoles and derivatives	Pyridoindoles	47.251	23	10	3	8	114908	290131	772019	471325	476294	85367.1	249656	416864	253903	346124	333940	597429	315068	427847	330170	124302	399593	302769	381506	380068	0.126979	0.126979
M224T42	224.098	42.193	3.50632	(.+/-.)-norketamine	[M+H]+	HMDB0060549		Benzenoids	Benzene and substituted derivatives	Halobenzenes	45.325	15	6	2	7	1072705	19316.4	23949.4	29405.9	19011.1	95236.8	20186.1	77936.2	20089.7	17097.9	79175.5	47690.6	44413.2	1.1862e+06	114414	26289.8	28332.7	98561.9	103613	98426.6	0.0294991	0.0294991
M160T225	160.138	224.773	2.8887	Norvaline betaine	[M+H]+			Organic acids and derivatives	Carboxylic acids and derivatives	Amino acids, peptides, and analogues	226.393	21	10	3	8	271188	35677.8	391658	26306.1	59652.3	331639	79868	40871	127212	125685	15468.2	34741.6	40041.4	13940.6	20957.9	36646.6	18505.9	150248	153315	153340	0.0116761	0.0116761
M256T34_1	256.27	34.371	1.62555	N-palmitoyl-d-sphingosine	[M+H-C18H34O2]+	HMDB0004949		Lipids and lipid-like molecules	Sphingolipids	Ceramides	35.033	17	9	1	7	1552516	1.85815e+06	1.72005e+06	1.65729e+06	1.88784e+06	2.38331e+06	2.15781e+06	1.62209e+06	1.79743e+06	2.2011e+06	1.3631e+06	2.11786e+06	1.74409e+06	1.57233e+06	2.38045e+06	1.90514e+06	1.56422e+06	1.56681e+06	1.56551e+06	1.50462e+06	0.02299	0.02299
M338T170	338.198	170.394	3.94984	N-(p-amylcinnamoyl)anthranilic acid	[M+H]+			Phenylpropanoids and polyketides	Cinnamic acids and derivatives	Cinnamic acid amides	171.447	16	8	1	7	14064	28388.8	34600.6	51418.3	27218.5	32115.8	49156.7	30309.3	47588.1	46443.2	32389.2	26844.5	43074.9	41137.3	32384.2	11789.2	35780.5	41346	40478.9	41344.7	0.0121842	0.0121842
M430T287	430.17	286.788	9.46823	N-(sec-butyl)-n-(4-(sec-butyl(trifluoroacetyl)amino)phenyl-2,2,2-trifluoroacetamide	[M+NH4]+			Benzenoids	Benzene and substituted derivatives	Anilides	297.211	16	9	1	4	19572	94661.4	92236.6	112449	89494.2	136870	92007.7	877.913	154368	99818.7	77680.1	67445.7	159010	75441.4	109402	162477	83865.5	85909.2	91853.1	87574.6	0.0346676	0.0346676
M153T84	153.07	84.025	9.41576	Nudifloramide	[M+H]+	HMDB0004193	C05842	Organoheterocyclic compounds	Pyridines and derivatives	Pyridinecarboxylic acids and derivatives	91.177	23	10	3	9	218904	331293	71071.1	385164	180427	1.38476e+06	98713.6	48448.6	133761	121584	41267.1	48810.3	43397.7	404197	66122.7	223307	67111.9	265376	260154	259657	0.012103	0.012103
M477T376	477.18	375.986	8.69996	Obacunone	[M+Na]+		C08775	Lipids and lipid-like molecules	Prenol lipids	Triterpenoids	376.791	14	9	1	4	57721	24319.2	35987.8	43222.3	143073	27853.5	57760.5	22695.1	21189.5	108209	29345.7	44432.6	41086.5	50520.3	38415.1	16109.4	43976.9	40202.3	41088.2	40218	0.0125177	0.0125177
M629T453_1	629.205	453.166	3.98126	Octadecamethyloctasiloxane	[M+Na]+			Organometallic compounds	Organometalloid compounds	Organosilicon compounds	468.658	12	6	1	4	7481	15545.8	7049.9	10021.6	22514.4	32715.2	6238.24	5800.01	28023.9	8977.98	8890.02	18664.1	21226.9	8590.11	21237.5	48061.3	9090.76	21473.6	22557.4	21449.5	0.0289909	0.0289909
M470T314	470.153	314.041	5.47583	Octanoic acid, 2-[[4-[([1,1'-biphenyl]-4-ylmethyl)amino]-6-chloro-2-pyrimidinyl]thio]-	[M+H]+			Benzenoids	Benzene and substituted derivatives	Biphenyls and derivatives	329.536	10	4	0	6	3447	22264.7	39943.5	45838.8	50651.9	56835.5	19220.7	19569	45236.9	54281.8	57079.2	33086.8	43234.4	43284.2	38047	17304.9	33086.1	38492.8	39282.3	39197.5	0.0111149	0.0111149
M250T375_2	250.163	375.403	0.710336	O-desmethyl-cis-tramadol	[M+H]+	HMDB0060997		Benzenoids	Benzene and substituted derivatives	Cyclohexylphenols	385.295	17	7	3	7	32788	41744.5	79155.4	6956.61	40086	15364.6	106978	51321.7	34861.2	152663	1591.99	6580.52	11090.6	6771.32	35454.6	2794.47	6834.32	33085.6	33098.9	34049.5	0.0165416	0.0165416
M313T286	313.17	285.882	0.776947	Olanzapine	[M+H]+	HMDB0005012	C07322				290.052	20	10	1	8	9453	25875.8	26578.5	55876.8	63866.5	41475	53926.9	28267.5	22868.7	62588.2	72338.6	39979.3	34670.6	48885	54485.4	28346.3	30260.1	33393.1	35676.6	33387.7	0.0386481	0.0386481
M282T34	282.29	33.727	7.06911	Oleamide	[M+H]+	HMDB0002117	C19670	Lipids and lipid-like molecules	Fatty Acyls	Fatty amides	34.382	20	9	3	8	19260587	2.48085e+07	2.35313e+07	2.77476e+07	2.38211e+07	2.7224e+07	2.51256e+07	2.23649e+07	2.7961e+07	2.36972e+07	1.48649e+07	3.0123e+07	2.37233e+07	1.67585e+07	2.05093e+07	2.44137e+07	1.78745e+07	2.37375e+07	2.37498e+07	2.29081e+07	0.0205598	0.0205598
M506T286_1	506.326	286.369	4.62558	Oleana-1,9(11)-dien-28-oic acid, 2-cyano-3,12-dioxo-, methyl ester	[M+H]+			Organic oxygen compounds	Organooxygen compounds	Carbonyl compounds	287.067	13	7	1	5	8019	3562.25	12815.2	6039.23	2649.75	18658.3	25094.2	8100.78	6912.13	15116	4916.31	8070.68	7535.56	7474.64	6139.86	5832.2	6667.2	9295.48	8435.86	9302.47	0.0553009	0.0553009
M247T57	247.25	57.3625	4.59158	Oleic acid	[M+H-2H2O]+	HMDB0000207	C00712	Lipids and lipid-like molecules	Fatty Acyls	Fatty acids and conjugates	58.053	20	9	3	6	35027	149519	193216	158975	264650	96393.7	139504	380994	275304	51906.1	133728	279437	203850	119429	198692	134582	157469	143204	142979	162235	0.0739498	0.0739498
M297T31_1	297.286	31.1185	9.85634	Oleic acid methyl ester	[M+H]+		C03425	Lipids and lipid-like molecules	Fatty Acyls	Fatty acid esters	35.004	18	8	3	7	305645	53948.3	183331	27940.4	19322.3	5754.24	101466	291351	126917	42680.3	42840.9	453660	178298	34982.2	226527	14162.3	237107	59351.7	78034.8	58815.5	0.167349	0.167349
M426T168_1	426.368	167.799	7.2589	Oleoyl-l-carnitine	[M+H]+	HMDB0005065		Lipids and lipid-like molecules	Fatty Acyls	Fatty acid esters	168.387	15	8	1	6	138596	22852.7	89014.8	21486	8323.84	23175.6	8046.04	195435	53903.6	19091.6	130002	31894.2	75990.1	27932.1	19100.8	449143	80237.7	289197	280351	289196	0.0178415	0.0178415
M441T285	441.345	284.502	0.659718	Oleoylserotonin	[M+H]+			Organoheterocyclic compounds	Indoles and derivatives	Tryptamines and derivatives	287.135	14	6	1	7	9612	7566.3	3265.89	1034.91	5494.33	13477.3	17261.3	2587.1	6376.02	19920.2	3016.13	8017.5	11680.4	4988.49	9263	2840.63	3216.53	4895.05	5737.21	4746.01	0.104264	0.104264
M500T245_1	500.371	245.085	3.8928	Oleyloxyethylphosphorylcholine	[M+Na]+			Organic nitrogen compounds	Organonitrogen compounds	Quaternary ammonium salts	245.543	13	6	1	6	17782	12610.7	44861.7	25010.3	12898.3	71448.4	38241.9	10932	24344.9	37925.1	28309.8	44751	34620.4	36555.9	10756.3	11286.7	17075	20701	21369.4	20702.3	0.0184261	0.0184261
M443T36_2	443.332	35.732	8.73098	Oligomycin b	[M+H-C17H30O8]+		C11312				36.982	15	6	2	7	29156	114520	109106	135250	123571	59111.9	80672.1	185578	107356	90869.8	102621	83267.5	149978	130486	101384	86521.5	66780	116045	116679	102978	0.0691135	0.0691135
M338T416	338.181	416.12	7.68535	Olopatadine	[M+H]+	HMDB0014906	C07789	Organoheterocyclic compounds	Benzoxepines	Dibenzoxepines	418.443	14	6	2	5	12095	16061.6	18090.2	62229	28937.5	21687.4	20470.6	20693.4	28320	21608.7	49242.4	42539.9	32404.3	36806	23514.8	15238	37215.4	26998.5	28374.3	27003.9	0.0288706	0.0288706
M136T227	136.08	227.177	8.87989	O-phosphotyrosine	[M+H-CH3O5P]+	HMDB0006049	C06501	Organic acids and derivatives	Carboxylic acids and derivatives	Amino acids, peptides, and analogues	230.07	20	9	3	8	15735	14576.5	8596.28	26779.1	22266	8980.34	13414.3	28935.2	7688.79	35417.6	36360.7	9795.89	13490.1	20098.1	15828.2	31627.3	13625	15393.6	22877	22833.3	0.211509	0.211509
M290T384	290.145	383.609	7.23232	Ophthalmate	[M+H]+	HMDB0005765	C21016	Organic acids and derivatives	Carboxylic acids and derivatives	Amino acids, peptides, and analogues	391.753	24	10	3	9	112872	96732.7	27191.1	1.28412e+06	337792	46256.2	31262	231999	312568	41394.9	803146	390011	398912	435467	275524	328398	710952	361676	368920	361754	0.0114255	0.0114255
M364T226	364.231	225.77	0.146291	Opipramol	[M+H]+			Organoheterocyclic compounds	Benzazepines	Dibenzazepines	241.729	17	10	1	6	4627	13402.6	17854	34292.8	19822.5	10913.3	34183.5	14831.5	13249.2	24227.2	20755.9	15575.9	33413.8	23594.3	16683.2	14749.3	7975.89	18623.2	19669.2	19771.5	0.0328345	0.0328345
M251T130	251.084	130.078	6.40022	Orcinol .beta.-d-glucoside	[M+H-2H2O]+			Organic oxygen compounds	Organooxygen compounds	Carbohydrates and carbohydrate conjugates	131.978	23	10	3	9	14476	39321.9	41825.7	78290.3	19045	30183.5	15302	15449	29183.2	23183.3	10109.1	8813.25	45585.2	80320	59868.7	27435.8	48158	37086.5	37085.5	36942	0.002245	0.002245
M336T232	336.263	232.415	6.18053	Oxeladin	[M+H]+			Benzenoids	Benzene and substituted derivatives	Phenylpropanes	233.238	19	10	1	8	29922	56320.1	91722.9	93558.9	64063.9	38876.9	88695.2	48064.2	38127.2	124787	69069.5	43218.4	62753.6	99608.7	44639	21859.7	59839.3	68141	68144.4	66408	0.0148233	0.0148233
M302T321_1	302.145	321.185	2.36421	Oxymorphone	[M+H]+	HMDB0015323	C08019				324.79	13	7	0	5	3943	31755.4	20643.1	67452.2	19821.3	8250	22051.6	26734.4	12849.5	25549.8	22254.5	22199.1	14542	20932.1	21984.6	26616.1	30508.6	28414.8	29351.3	28397.2	0.0190049	0.0190049
M478T307_1	478.163	306.614	0.678334	Oxymorphone 3-.beta.-d-glucuronide	[M+H]+			Organic oxygen compounds	Organooxygen compounds	Carbohydrates and carbohydrate conjugates	307.765	13	6	1	6	2460	4072.12	6476.78	3922.12	5305.98	4762.11	8434.24	5213.82	7506.59	7134.95	4606.83	7231.66	6090.09	3073.15	5151.22	3753.24	7334.71	5529.47	5605.69	5594.39	0.00737624	0.00737624
M164T228	164.076	228.363	0.767648	P-acetaminobenzaldehyde	[M+H]+			Benzenoids	Benzene and substituted derivatives	Anilides	229.979	28	10	3	8	10206	8586.47	17462.7	38202.6	34603.2	3260.58	8465.16	32333.6	8690.12	60650.6	72689.9	5488.41	14729	24455	33324.1	28410.3	9246.33	23171.3	20833	20840.8	0.0623537	0.0623537
M235T33	235.213	33.068	6.73703	Palmitic acid alkyne	[M+H-H2O]+			Lipids and lipid-like molecules	Fatty Acyls	Fatty acids and conjugates	43.493	20	9	3	8	32144	56808.8	101584	33525.2	149804	47047.4	40626.2	76781.2	90727.8	17508.3	192562	57635.8	109998	55038.9	47734.4	111779	56379.7	51205	53574.7	53539.2	0.0257332	0.0257332
M435T223_1	435.247	223.11	6.69017	Palmitoyl 3-carbacyclic phosphatidic acid	[M-H+2Na]+			Lipids and lipid-like molecules	Fatty Acyls	Fatty acid esters	224.739	13	8	1	4	5887	20553.4	22891.7	24853.2	27623.3	19576.7	13656.7	30049.4	11696	18309	28723.7	7398.54	21755.1	20961.5	14202.9	22004.1	13430.1	20965	20853.1	20964.7	0.00308311	0.00308311
M330T38_1	330.308	38.269	1.43192	Palmitoylserinol	[M+H]+	HMDB0013654		Lipids and lipid-like molecules	Fatty Acyls	Fatty amides	38.895	16	9	1	6	291202	332110	380768	224530	94694	104447	347158	277753	270023	211498	257253	199107	181265	343853	409352	309439	163292	225122	225085	214661	0.0272031	0.0272031
M577T171_1	577.245	171.125	2.8227	Pantethine	[M+Na]+	HMDB0003828	C12661	Organic acids and derivatives	Carboxylic acids and derivatives	Amino acids, peptides, and analogues	171.746	11	5	1	5	31195	79594.3	25204.5	13222.7	9022.9	31665.5	6502.57	11533.2	19958.4	11734.7	26085.3	85049.7	2861.26	18570.5	20021.4	8991.58	97990.6	30069.6	28442.8	28451.1	0.0323175	0.0323175
M220T277	220.125	276.695	2.39382	Pantothenic acid	[M+H]+	HMDB0000210	C00864	Organic acids and derivatives	Carboxylic acids and derivatives	Amino acids, peptides, and analogues	278.823	22	10	3	9	362075	170955	801014	228921	271932	187437	517298	471571	934977	604206	266282	469021	694509	305732	717699	474373	352821	365047	377412	365110	0.019287	0.019287
M330T427	330.128	427.076	1.13156	Paroxetine	[M+H]+	HMDB0014853	C07415	Organoheterocyclic compounds	Piperidines	Phenylpiperidines	428.679	17	8	1	6	8848	16462.1	36393.1	60214.3	34164	9234.82	46517.4	28641.1	7172.62	52373.7	35931.3	11388.7	11286.8	41812.7	25706.9	37236.9	36537.4	32124	32125.2	31438.1	0.0124264	0.0124264
M249T39_1	249.155	38.922	2.16865	Parthenolide	[M+H]+		C07609	Lipids and lipid-like molecules	Prenol lipids	Terpene lactones	56.508	13	6	1	6	21013	35083.2	80747.6	24527.7	117569	61919.1	7461.35	121252	64232.1	23583.9	306603	76046.3	30407.7	10763.9	72703.9	38712.3	98675.1	81882.6	81262.6	74189.4	0.0540242	0.0540242
M130T83	130.09	82.937	8.79811	Paxilline	[M+H-C18H26O4]+	HMDB0030323	C13782				86.75	11	6	1	4	10302	99624.2	97759.1	81520.5	141106	28512.4	116265	61719.8	134941	140950	56619.1	55174.5	64752.2	105587	119382	134454	63111.5	105444	91713.2	105301	0.0782248	0.0782248
M286T227_1	286.283	226.804	9.77181	Pentadecanoyl ethanolamide	[M+H]+			Organic nitrogen compounds	Organonitrogen compounds	Amines	227.55	24	10	2	9	6091	2969.43	2143.01	3181.7	15196.4	9581.4	4179.16	2961.62	1795.58	2835.21	6710.12	1255.64	3637.41	1979.86	1622.52	4839.87	1771.44	4126.32	3424.56	3335.62	0.119357	0.119357
M341T414	341.189	414.152	0.667027	Pentamidine	[M+H]+	HMDB0014876	C07420				420.95	17	8	1	7	40139	35095.7	24831.3	196240	26538.9	24509.6	16894.9	79284.7	36860.6	24185.7	182633	85058	55401	92475.1	74387.4	60009.3	133843	79000.9	81496.8	78918.7	0.0183613	0.0183613
M484T46_1	484.356	45.7605	9.51196	Perifosine	[M+Na]+			Organic acids and derivatives	Organic phosphoric acids and derivatives	Phosphate esters	47.311	18	7	1	6	24156	29445.4	95327.2	91489.7	38447.3	22535.8	53735	109126	35311.5	46134.7	77317.4	26948.3	34892.4	47124.2	50208.9	24978.4	48180.7	100925	83760.2	83998	0.109896	0.109896
M135T218	135.096	218.145	1.64554	(-)-perillyl alcohol	[M+H-H2O]+		C02452	Lipids and lipid-like molecules	Prenol lipids	Monoterpenoids	219.115	22	10	3	9	13806	34565.5	52632.2	69189.6	35555.2	35457.2	88641.3	38264.4	55495.3	51394.2	41611.1	41429	30823.5	37823.4	53442.8	13966.9	49086	42790.8	43014.8	43015.2	0.00301397	0.00301397
M427T217	427.206	216.839	2.31956	Perospirone	[M+H]+			Organoheterocyclic compounds	Diazinanes	Piperazines	220.614	11	3	1	7	14474	2281.05	17704.9	15259.7	13687.6	53685.8	2954.71	12084.4	11261.8	16613.4	9307.49	23503.2	13840.3	11256.6	10065	8872.69	12078.2	12142.6	12196.9	12172.2	0.0022346	0.0022346
M350T202	350.218	202.283	4.52619	Phe-Ala-Leu	[M+H]+			Organic acids and derivatives	Carboxylic acids and derivatives	Amino acids, peptides, and analogues	203.401	21	7	3	9	9483	24359.6	33114.1	44969.6	58324.5	47288.5	58910.2	45518.3	18932.7	42712.5	28964.5	30562.9	47240.7	33166.3	24187.2	24602.7	22982.7	43985	44004.8	36489.4	0.104434	0.104434
M280T268	280.138	267.521	3.01115	Phe-asn	[M+H]+			Organic acids and derivatives	Carboxylic acids and derivatives	Amino acids, peptides, and analogues	269.31	20	9	3	8	5331	3178.69	8241.77	10372.3	6006.3	14625.6	11678.3	5236.56	11112.4	8809.9	8892.64	11436.1	6834.16	5653.73	4431.16	7489.71	6079.39	9183.82	9728.06	9188.51	0.0334022	0.0334022
M436T159_1	436.232	159.03	0.686257	Phe-Asn-Arg	[M+H]+			Organic acids and derivatives	Carboxylic acids and derivatives	Amino acids, peptides, and analogues	165.246	12	8	1	3	5268	19083.2	25394.9	23414.1	27028.1	16106.3	39997.2	43177.7	26831.9	32607.4	38632.3	24376.4	23307.3	25081.6	17653.7	9872.66	28814.5	22786.6	18221.5	22679.3	0.122719	0.122719
M294T276	294.156	276.248	3.82434	Phe-gln	[M+H]+			Organic acids and derivatives	Carboxylic acids and derivatives	Amino acids, peptides, and analogues	282.12	14	6	3	5	5137	7429.81	8271.96	16399.1	10753.5	12701.8	14659.3	7424.91	7216.76	11338	2244.64	9735.07	7775.51	7865.82	7644.53	8674.96	8169.17	8115.06	8109.75	7860.23	0.018138	0.018138
M451T390	451.245	390.033	5.20514	Phe-Glu-Arg	[M+H]+			Organic acids and derivatives	Carboxylic acids and derivatives	Amino acids, peptides, and analogues	398.516	13	4	2	7	3962	11613.3	13344	31312.6	9214.12	9055.42	26578.8	13303.3	10274.7	10474.5	16970.7	17540.6	19004.6	19624.6	12054.2	14289.1	10101.9	14126.3	14379.6	14067.8	0.0116771	0.0116771
M223T280	223.113	279.93	3.1995	Phe-gly	[M+H]+		C18481	Organic acids and derivatives	Carboxylic acids and derivatives	Amino acids, peptides, and analogues	281.81	13	8	2	3	8835	10833.9	6986.46	38574.7	8684.13	7317.72	9483.26	10624	9295.25	8921.6	16128.1	15841.4	16546.5	30460	14275.5	9877.36	10322.3	13631.5	13620.8	13368.7	0.010987	0.010987
M379T328	379.222	328.455	2.06094	Phe-Gly-Arg	[M+H]+			Organic acids and derivatives	Carboxylic acids and derivatives	Amino acids, peptides, and analogues	329.325	14	6	3	5	6069	9652.19	6872.91	9759.96	7006.11	9312.61	18385	3984.11	10338	7652.3	12067.7	6577.2	10176.8	10921.2	4043.58	2486.38	6739.14	8325.84	8274.26	7649.47	0.0465777	0.0465777
M279T169	279.179	169.183	5.09641	Phe-ile	[M+H]+			Organic acids and derivatives	Carboxylic acids and derivatives	Amino acids, peptides, and analogues	170.234	23	10	3	9	165692	110314	366813	211379	141926	381788	513881	299966	339826	266796	285266	707761	431021	126803	165070	189312	390587	235066	238974	235069	0.00954202	0.00954202
M407T281	407.28	281.402	9.01666	Phe-Leu-Lys	[M+H]+			Organic acids and derivatives	Carboxylic acids and derivatives	Amino acids, peptides, and analogues	285.297	17	5	3	7	2842	10003.2	22152.6	26723.9	3516.87	16456.2	25848.3	16189.3	19251.1	20315	19626.3	22377.1	19681.3	19770.4	16064.3	12452.4	9129.54	11614.1	10987.7	11617.8	0.0317962	0.0317962
M297T175	297.135	174.734	9.4272	Phe-met	[M+H]+			Organic acids and derivatives	Carboxylic acids and derivatives	Amino acids, peptides, and analogues	175.777	21	10	2	9	10998	26316.2	67347.4	54348	33921.8	48687	102828	55349.3	70809	48813.6	58288.6	79505.6	65972.7	30135.1	28781.8	36468	58994.8	37837.3	37943.3	29580.9	0.136608	0.136608
M180T143	180.093	143.419	4.24406	Phenacetin	[M+H]+		C07591	Benzenoids	Benzene and substituted derivatives	Anilides	145.037	12	7	1	4	32324	44076.8	63492.4	163853	75623.6	151906	32262.5	49171.8	39318.8	38174	34542.5	76473.3	35644.2	80785.4	74885.5	40628.6	29852.2	72798.5	72904.5	67208.3	0.045914	0.045914
M241T368	241.163	367.878	4.44372	Pheniramine	[M+H]+	HMDB0015557		Organoheterocyclic compounds	Pyridines and derivatives	Pheniramines	368.546	22	10	3	9	101418	30830.2	17070.5	43213.8	46305.4	539866	22677.7	21029.3	25005.2	15968.5	20611.6	44646.6	19847	31226.1	12130	49713.3	22585.2	52547.1	53996.3	52626.4	0.0153561	0.0153561
M103T259	103.057	259.25	7.86315	Phenylacetaldehyde	[M+H-H2O]+	HMDB0006236	C00601	Benzenoids	Benzene and substituted derivatives	Phenylacetaldehydes	263.104	22	10	3	9	30642	48685	131718	58432.2	65314.7	210740	135340	91704.1	128645	142104	59823	111707	96601.4	72210.1	86377.5	97137	45038	86211.7	88905.4	86234.6	0.0177768	0.0177768
M287T226_1	287.109	226.053	5.30257	Phenylacetyl-l-glutamine	[M+Na]+	HMDB0006344	C04148	Organic acids and derivatives	Carboxylic acids and derivatives	Amino acids, peptides, and analogues	227.55	17	8	1	8	1295037	242930	9733.62	989624	518452	634067	26748.5	11745.6	13821.3	30569.8	9847.58	4427.44	11720.1	977261	13491.8	578174	2453.15	261865	289045	262166	0.0575829	0.0575829
M122T162	122.1	161.933	9.43282	Phenylethylamine	[M+H]+	HMDB0012275	C05332	Benzenoids	Benzene and substituted derivatives	Phenethylamines	163.265	21	9	3	9	26198	5564.67	16528.9	15797.7	12000.7	11733.6	22275.2	63023.1	4260.32	19574.1	20867	30874	95910.1	66304.3	54148.5	62238	22689.5	32073.8	34163.1	34215.1	0.0364816	0.0364816
M313T153_1	313.164	152.819	4.98576	Phe-phe	[M+H]+			Organic acids and derivatives	Carboxylic acids and derivatives	Amino acids, peptides, and analogues	154.165	19	10	1	8	65878	102504	196588	128568	158658	301590	227518	131147	206569	126386	123837	273784	157288	103563	84798.7	174012	262502	154825	155147	154824	0.00120119	0.00120119
M263T237	263.147	236.762	1.76943	Phe-pro	[M+H]+	HMDB0011177		Organic acids and derivatives	Carboxylic acids and derivatives	Amino acids, peptides, and analogues	237.829	19	10	1	8	70226	19998.2	3227.39	22435.7	30176.7	58910.9	53939.7	19545.5	13329.8	56917.3	13815.3	18735.8	12615.9	11324.7	11392.4	15428.5	5434.34	7789.86	12221.7	8011.77	0.267326	0.267326
M381T191_1	381.193	191.277	5.48796	Phe-Ser-Lys	[M+H]+			Organic acids and derivatives	Carboxylic acids and derivatives	Amino acids, peptides, and analogues	192.382	17	9	1	7	18331	29919.2	49011.4	61747.8	42097.7	17478.9	69977.9	31059.4	30509.7	74697.8	44764.4	31238.1	35285	44176.3	56807.9	14051.4	45102.5	41892.9	42934.8	41888.7	0.01427	0.01427
M329T191	329.16	190.631	8.9649	Phe-tyr	[M+H]+			Organic acids and derivatives	Carboxylic acids and derivatives	Amino acids, peptides, and analogues	191.722	21	10	2	9	11160	10654.4	26592.9	19958.8	16955	33104.9	32889.6	20206	25636.6	21814.3	25996.9	28594.6	21933	12010.2	11167.2	16518.2	22287.7	19754.5	19827.4	19753.5	0.00214199	0.00214199
M265T183	265.163	182.575	3.6917	Phe-val	[M+H]+			Organic acids and derivatives	Carboxylic acids and derivatives	Amino acids, peptides, and analogues	183.335	22	10	3	9	22504	41859.8	82988.4	86578.7	53439.5	137801	124184	57589.3	73747.3	90849.2	58799.4	92107.7	72719.2	53211.7	39243.8	61421.9	64922.6	65133.7	66112.1	65887.8	0.0078003	0.0078003
M421T288_1	421.266	288.243	1.95895	Phe-Val-Arg	[M+H]+			Organic acids and derivatives	Carboxylic acids and derivatives	Amino acids, peptides, and analogues	289.706	20	10	1	6	3635	2963.44	9836.04	9253.56	6528.67	7118.77	20818.1	4626.33	7742.55	14025.6	7172.16	7582.05	8089.26	9540.66	4339.19	4566.51	9720.32	8983.96	9579.69	8941.77	0.0389106	0.0389106
M300T113	300.3	113.43	9.10435	Phytosphingosine	[M+H-H2O]+	HMDB0004610	C12144	Organic nitrogen compounds	Organonitrogen compounds	Amines	115.147	23	9	2	9	147176	194662	392994	38024	94076.2	172694	591685	250938	508852	286417	38888.4	98361.2	148873	97548.8	95507.6	105564	104662	167125	167114	166409	0.00245902	0.00245902
M495T437	495.144	436.739	6.20273	Picroside ii	[M+H-H2O]+			Phenylpropanoids and polyketides	Tannins	Hydrolyzable tannins	441.415	13	8	1	4	4938	8869.14	11015.3	12538.4	15030.2	23240.5	15635.5	7922.45	13808.4	11499.6	11866.4	27926.2	22232	10619.2	16687.2	9356.01	7117.7	15570.9	15960	15423.1	0.0177206	0.0177206
M209T247	209.134	247.015	6.62378	Pilocarpine	[M+H]+	HMDB0015535	C07474				248.268	21	10	3	8	6022	14893.4	11455	22937.6	13975	18881.6	10692.1	11165.2	17295.5	11537.8	14794.9	21874.1	16513.4	19791.8	23115.2	6788.08	19783.1	14079.4	13819.2	13937.6	0.00934297	0.00934297
M357T263_1	357.123	263.036	9.7771	Pioglitazone	[M+H]+	HMDB0015264	C07675				264.917	13	4	1	8	3207	12708.9	22627.3	11652.9	19118.5	16778.3	14047.7	17379.4	16966.1	13274.9	9869.25	14700.7	11636.8	10890.5	10070.2	9866.53	12543.4	16366.7	15104.6	16386.5	0.046041	0.046041
M386T444	386.139	443.55	4.42702	Pitavastatin	[M+H-2H2O]+	HMDB0041991	C13334	Organoheterocyclic compounds	Quinolines and derivatives	Phenylquinolines	451.362	12	5	1	5	20655	259320	173555	266849	205612	179389	147350	316034	282075	179690	236251	100490	239609	279330	205275	203823	63458.4	183128	182668	173107	0.0314933	0.0314933
M464T317	464.154	317.089	6.20797	Platensimycin	[M+Na]+		C20132	Benzenoids	Benzene and substituted derivatives	Benzoic acids and derivatives	318.155	12	4	2	6	3399	10079.9	20542.6	21565.1	13503.4	17660.2	22244.2	19943.8	18002.7	20718	25451.3	14128.3	19354.7	13802.1	14508.7	14774.1	23205.2	14706.4	13954.6	14393.7	0.0263149	0.0263149
M437T326	437.135	326.048	7.95528	Podofilox	[M+Na]+	HMDB0015310	C08411	Lignans, neolignans and related compounds	Lignan lactones	Podophyllotoxins	327.9	13	7	1	5	85246	15796.9	15047.9	10471.4	10814.9	240338	19405.5	27950.3	22746.3	9549.6	12363.8	19856	16551.3	12080.3	9348.5	94479.5	13404.3	14113.1	20159	21786.7	0.216374	0.216374
M593T219	593.415	218.988	2.45041	Podototarin	[M+Na]+			Lipids and lipid-like molecules	Prenol lipids	Diterpenoids	219.39	12	8	1	3	3916	9835.43	11679.8	15749.7	14889.9	12585.5	14543.8	15848.7	5958.67	13994.2	11670.4	7919.16	13156.6	8805.69	9518.38	4439.96	16594.9	13414.2	13036	13409.8	0.0163402	0.0163402
M189T36_2	189.17	36.33	7.92386	Polygodial	[M+H-CH2O2]+		C09712				50.722	23	9	3	9	45596	198854	194227	171619	517961	144713	163439	341091	178774	75847.8	683223	200897	173777	141769	163132	317878	234975	202709	233532	232805	0.0788696	0.0788696
M507T475	507.106	475.19	5.63287	Prednisolone phosphate	[M-2H+3Na]+			Lipids and lipid-like molecules	Steroids and steroid derivatives	Pregnane steroids	480.133	12	8	1	3	4684	676.914	388.223	2327.56	6790.62	17279.4	795.448	572.299	3371.24	1568.81	967.994	6211.23	2353.7	1007.97	4161.45	7796.38	804.866	4539.74	4536.17	4150.32	0.0507644	0.0507644
M221T216	221.173	215.712	8.47395	Prilocaine	[M+H]+	HMDB0014888	C07531	Organic acids and derivatives	Carboxylic acids and derivatives	Amino acids, peptides, and analogues	216.774	13	5	3	5	606685	50075.1	33060.3	13801.9	311748	13811.2	2.05748e+06	104206	24247.9	29352.6	20133.5	11687.7	123803	41514.9	45239	26414.7	15740.2	160666	160675	161908	0.00443533	0.00443533
M343T436	343.221	435.983	5.63443	Pro-Ala-Arg	[M+H]+			Organic acids and derivatives	Carboxylic acids and derivatives	Amino acids, peptides, and analogues	438.243	17	6	3	6	4670	19342.2	19580	25389.7	25995.6	31521	70935.5	29080.9	29621	33890	24894.7	24236.9	32547.7	14388.7	24483.2	53322.4	24643.4	24211.8	28209.2	28250.4	0.0862712	0.0862712
M230T354	230.121	354.017	0.965293	Pro-asn	[M+H]+			Organic acids and derivatives	Carboxylic acids and derivatives	Amino acids, peptides, and analogues	355.559	22	10	3	9	17790	25469	46327.6	74026	52278	56309.5	89669.9	42306.4	34687.5	105588	55782.4	29855.1	41955.2	55105.5	24374.2	33253.9	28054.3	35250.6	35266.6	33366.5	0.0315469	0.0315469
M386T140_1	386.197	139.767	4.64039	Pro-Asn-Arg	[M+H]+			Organic acids and derivatives	Carboxylic acids and derivatives	Amino acids, peptides, and analogues	141.229	12	5	1	6	6617	10549	36218.2	22950.6	9032.78	7930.67	12959.4	11303.8	13054.9	37821	18916	11049.2	13453.8	3837.37	20530.7	13171.7	13462.9	18163.5	16031.4	18179.6	0.0707775	0.0707775
M231T420	231.105	420.349	6.72392	Pro-Asp	[M+H]+			Organic acids and derivatives	Carboxylic acids and derivatives	Amino acids, peptides, and analogues	436.725	26	10	3	7	24469	16170.6	22643.8	47485.5	109905	25019.1	37845.7	26934.3	17262.9	29644.1	31958.2	22098.3	40381.3	31389.8	41593.8	52030.9	13473.9	26663.8	27813.6	26685.1	0.0243136	0.0243136
M244T360	244.137	360.332	1.34087	Pro-gln	[M+H]+			Organic acids and derivatives	Carboxylic acids and derivatives	Amino acids, peptides, and analogues	361.284	22	9	3	9	22827	32343.9	23060.1	68468.8	39581.6	90415.4	78645.8	32541.4	23410	52367.4	25470.9	28974.5	32253.2	24936.1	19955	22382.4	18955.5	30144	30137.6	28775	0.0265629	0.0265629
M245T413	245.121	413.233	5.77185	Pro-Glu	[M+H]+			Organic acids and derivatives	Carboxylic acids and derivatives	Amino acids, peptides, and analogues	416.376	22	10	3	9	52852	45923.8	55536.8	98235.7	137177	92236	92309.6	64498.8	46275.9	77748	72302.3	72748.7	87167.3	55616.7	70838.2	75429.4	41393.7	54048.4	56096.1	56267.4	0.022258	0.022258
M201T322	201.092	321.649	8.96956	Pro-Glu-Arg	[M+2H]2+			Organic acids and derivatives	Carboxylic acids and derivatives	Amino acids, peptides, and analogues	323.54	20	10	2	8	49104	20185.3	21779.7	8630.56	66845.5	82258.9	36135.3	42076.8	92030.4	20078.9	19974.5	57555.5	38446.8	10699.6	49796.9	38223	81549.8	42254.7	42256	41183.6	0.0147685	0.0147685
M270T397_1	270.152	397.235	1.07071	Pro-Gly-Pro	[M+H]+			Organic acids and derivatives	Carboxylic acids and derivatives	Amino acids, peptides, and analogues	399.431	16	9	1	6	7786	32761.2	26571.7	60995	24103.8	17559	15955.5	35137.6	22101.2	24810.1	44617.2	36363.2	27326.2	43372.5	32899.8	11445.8	37332.1	37225.5	43487.5	37312.4	0.0912661	0.0912661
M229T420	229.125	419.518	2.01527	Pro-hyp	[M+H]+	HMDB0006695		Organic acids and derivatives	Carboxylic acids and derivatives	Amino acids, peptides, and analogues	432.334	20	9	3	7	24599	47607.7	29344.4	36878.1	37887	50527.4	13903.7	35549	99671.3	91653.6	39697.9	141125	93181.3	62990.9	99539.8	24689.2	57027.6	84128.4	84023.5	81438.2	0.0183156	0.0183156
M193T276	193.115	276.197	9.69164	Pro-Ile-Arg	[M+2H]2+			Organic acids and derivatives	Carboxylic acids and derivatives	Amino acids, peptides, and analogues	290.89	29	9	3	9	4103	11205.2	25702.7	19583.2	8863.2	999.678	25064.7	4679.59	5124.08	23632.8	1177.73	11281.9	10407.1	25131.5	7880.02	3787.26	13664.2	14045.4	14050.6	14469	0.0171339	0.0171339
M229T363	229.163	362.712	4.17744	Pro-leu	[M+H]+			Organic acids and derivatives	Carboxylic acids and derivatives	Amino acids, peptides, and analogues	362.995	23	10	3	9	718278	242340	65782	263371	547493	2.76477e+06	63741.8	32086.9	69628	37153	30983.4	39381.2	28241.1	190434	27292.3	237229	45832.5	348011	348011	348891	0.00145889	0.00145889
M574T201_1	574.283	200.984	1.26621	Propanoic acid, 2-[[1-[3-[4-([1,1'-biphenyl]-4-ylcarbonyl)-2-propylphenoxy] propyl]-1,2,3,4-tetrahydro-5-quinolinyl]oxy]-2-methyl-	[M+H-H2O]+			Benzenoids	Benzene and substituted derivatives	Benzophenones	202.421	13	6	1	6	4417	5044.05	11249.2	7286.97	8407.12	17922.9	7153.87	4217.49	12189.9	7504.57	11469.4	11784.8	12464.3	6617.26	5290.79	3970.92	9065.4	10617.4	9763.3	10600.1	0.0472765	0.0472765
M263T218_1	263.117	217.894	2.53268	Pro-phe	[M+H]+			Organic acids and derivatives	Carboxylic acids and derivatives	Amino acids, peptides, and analogues	219.316	18	9	1	8	55276	119179	143202	239068	151679	129234	246583	9640.86	190299	221599	198044	167134	232168	154094	244859	122777	165178	172002	174345	174348	0.00779999	0.00779999
M213T414_2	213.13	414.173	3.63732	Pro-pro	[M+H]+			Organic acids and derivatives	Carboxylic acids and derivatives	Amino acids, peptides, and analogues	417.046	25	10	2	9	21783	42533.3	30316.4	48835.4	146846	148184	23204.1	64835.2	43347.2	43458.3	74353.3	90867.4	42716.3	27919.1	256943	38380.1	148356	78435	112462	112907	0.195277	0.195277
M745T400	745.432	400.135	0.0106323	Prosapogenin a	[M+Na]+			Lipids and lipid-like molecules	Steroids and steroid derivatives	Steroidal glycosides	401.06	10	7	0	3	2738	9986.08	10975.7	11221.1	3736.56	10608.9	12457.3	10819.7	12669.1	11701.6	7396.65	5624.2	7136.56	1893.56	8338.77	10281.3	10506	10287.7	10453.1	10454.9	0.0092323	0.0092323
M531T155_1	531.284	155.482	6.99553	Proscillaridin a	[M+H]+		C12816	Lipids and lipid-like molecules	Steroids and steroid derivatives	Steroid lactones	156.785	13	6	1	6	80496	174007	186409	37666.5	80004.5	167785	80797.4	115863	242078	181787	197764	303983	227240	132532	203662	212326	184995	178477	180966	180980	0.00800014	0.00800014
M301T103	301.227	103.12	4.32361	Prostaglandin d1	[M+H-3H2O]+	HMDB0005102	C06438	Lipids and lipid-like molecules	Fatty Acyls	Eicosanoids	107.947	15	6	3	6	355290	77641.3	65515.1	28192.8	169148	63432.4	41295.4	2.17979e+06	38567.3	404481	97776.5	35778.9	34230	196979	187833	8761.94	221332	239145	241034	239148	0.00454406	0.00454406
M420T233	420.284	232.559	7.58219	Prostaglandin e1 ethanolamide	[M+Na]+			Lipids and lipid-like molecules	Fatty Acyls	Eicosanoids	249.047	21	9	1	6	15639	9991.31	19943.2	18870	12190.2	3814.42	16543.8	15197.4	8707.23	25608.1	37884.2	9581	12987.5	17516.7	21014.2	6943.56	9827.97	16956.2	21182.6	16950.7	0.132967	0.132967
M339T146_1	339.263	146.337	2.03306	Prostaglandin f1.alpha.	[M+H-H2O]+	HMDB0002685	C06475	Lipids and lipid-like molecules	Fatty Acyls	Eicosanoids	156.785	14	6	1	6	602741	1946.52	2.05369e+06	463143	205755	48131.8	107692	2.56589e+06	2.70378e+06	546591	57567.9	3.99978e+06	1.51648e+06	125437	243711	2.04278e+06	162101	1.2046e+06	718802	1.20097e+06	0.268308	0.268308
M391T378	391.2	377.937	8.89048	Prostaglandin g2	[M+Na]+		C05956	Lipids and lipid-like molecules	Fatty Acyls	Eicosanoids	381.734	15	6	2	7	38269	32005.8	8833.27	227795	29883.3	18535.4	6670.31	93138.9	69947.2	11351.6	160471	69104	75128.7	82165.3	64203.6	85243	110946	65094.6	65077.9	62532.8	0.0229514	0.0229514
M217T365	217.137	365.428	2.88684	Pro-Thr	[M+H]+	HMDB0004620		Organic acids and derivatives	Carboxylic acids and derivatives	Amino acids, peptides, and analogues	365.987	21	9	3	9	302557	569183	278322	347602	233085	624849	204406	228157	1.20013e+06	457443	441017	606136	616128	544419	155430	365778	635504	375746	378341	378354	0.00397846	0.00397846
M563T153	563.288	152.807	9.87072	Protoporphyrin ix	[M+H]+	HMDB0000241	C02191	Organoheterocyclic compounds	Tetrapyrroles and derivatives	Porphyrins	153.5	11	8	0	3	20960	30827.6	34918.1	20237.1	16245.2	44004.6	19626.6	58479	92136.8	32300.8	38164.8	74173.2	48783.5	18385.3	59799.8	36779	36283.4	44633.9	46862.5	45869.7	0.0243846	0.0243846
M302T116	302.315	116.397	2.94937	Pro-Trp	[M+H]+	HMDB0000269	C00836	Organic nitrogen compounds	Organonitrogen compounds	Amines	118.006	28	9	3	9	1576758	4.97099e+06	4.94123e+06	719550	1.32931e+06	479642	3.98205e+06	420730	6.06438e+06	2.25581e+06	566006	1.54576e+06	1.54211e+06	1.45501e+06	883691	2.15248e+06	2.12765e+06	2.24206e+06	2.0485e+06	2.0112e+06	0.0589989	0.0589989
M430T291_1	430.238	291.108	8.5476	Pro-Trp-Lys	[M+H]+			Organic acids and derivatives	Carboxylic acids and derivatives	Amino acids, peptides, and analogues	293.342	22	9	1	6	6820	55105.4	43893	24429.4	36337.3	10970.7	18236.2	53446.5	17679.8	41591.8	19292.7	18444.6	25999.4	32840.4	29756.4	10089.8	64989	37940.4	31462.6	40217.3	0.124307	0.124307
M215T285_1	215.146	285.163	5.83938	Pro-val	[M+H]+			Organic acids and derivatives	Carboxylic acids and derivatives	Amino acids, peptides, and analogues	287.412	22	10	3	9	34394	14957.8	17013.7	54543.3	49746	129299	30168.8	24896.8	26226.4	31271.9	26072.8	29157.5	21652.6	30957.6	25465.8	22004.8	14161.8	27801.9	28477.4	29555.2	0.030907	0.030907
M343T417_1	343.243	416.773	2.05977	Pro-Val-Lys	[M+H]+			Organic acids and derivatives	Carboxylic acids and derivatives	Amino acids, peptides, and analogues	418.429	13	6	1	6	16032	28419.4	35846.9	33639	20657.4	12399.2	47286.4	87017.8	9477.67	34081	33861.4	11616.1	16963.7	26373	85660.5	12876.6	5718.87	43318.7	35334.5	43087.7	0.111986	0.111986
M154T187	154.102	186.761	2.02282	Pseudopelletierine	[M+H]+	HMDB0034580	C10865	Organoheterocyclic compounds	Piperidines	Piperidinones	187.822	17	8	3	6	15999	51786.3	90713.9	76830.3	48308.1	15995.4	86247.7	18519.6	26530	88596	41089.4	40395.2	30785.7	61994.8	32128.4	3922.3	70995	50644.5	45509.3	50641.9	0.0605755	0.0605755
M484T325_2	484.303	325.137	1.74225	Psychosine	[M+Na]+	HMDB0000648	C01747	Lipids and lipid-like molecules	Sphingolipids	Glycosphingolipids	329.684	10	4	0	6	5972	8656.11	3900.51	32543.6	19703.5	26970.8	14126.1	9715.17	4953.5	33772.4	27801.9	19766.5	11184.5	17349.8	16825.1	4498.8	9207.22	19636.9	19636.3	19896.7	0.00761471	0.00761471
M249T87	249.156	87.11	5.62886	Pterosin a	[M+H]+			Benzenoids	Indanes	Indanones	89.35	19	8	3	8	24949	32145.2	43469.3	30069	64616.7	32751.7	47566.9	55504	33143	21376.4	252093	37095.6	26688.9	25905.9	39991.2	26663.3	41538.7	49963	54729.1	49960.8	0.0533909	0.0533909
M121T116	121.054	115.568	0.775099	Purine	[M+H]+	HMDB0001366	C15587	Organoheterocyclic compounds	Imidazopyrimidines	Purines and purine derivatives	117.598	19	8	3	7	32537	10756.2	103534	1436.04	20874.8	10578	75131.9	89345.6	32164.3	102731	15674.1	30542	71263	12566.7	213517	5809.51	18738.2	44052.8	43483.2	43495.9	0.00744612	0.00744612
M494T314	494.212	314.011	3.05017	Puromycin	[M+Na]+		C01610	Nucleosides, nucleotides, and analogues	Purine nucleosides	Purine 3'-deoxyribonucleosides	318.041	13	8	1	4	2990	27808.3	25799.3	41820	44636.8	25907.5	26130.8	25214.4	34004.1	20653.2	45856	26635.1	40561.4	20955.5	78796.3	29901.8	25103.7	24377.5	24366	24845.1	0.0111447	0.0111447
M330T147	330.275	147.088	8.5754	Putative (3-hydroxyhexadecanoyl)glycine (aka commendamide)	[M+H]+			Organic acids and derivatives	Carboxylic acids and derivatives	Amino acids, peptides, and analogues	148.276	15	6	3	6	36941	49013.9	57710.4	61259.3	128630	123868	166312	36701.2	71382.2	133949	49472.9	57061.2	79276.7	93210.9	65505.1	31851.4	40755.4	71816.1	72346.8	71810	0.00428053	0.00428053
M469T39_1	469.342	38.934	0.136928	Pygenic acid c	[M+H-2H2O]+			Lipids and lipid-like molecules	Prenol lipids	Triterpenoids	57.914	16	8	1	6	94853	83534.3	70587.5	55097.7	203693	47397	75175.1	95254.5	30533.2	75292.1	690115	59369.1	126460	63787.2	69064.5	87774	62087.8	77275.2	81699.4	77113.8	0.0330658	0.0330658
M365T226	365.158	226.269	6.74172	Pyridaben	[M+H]+		C18614	Benzenoids	Benzene and substituted derivatives	Phenylpropanes	227.55	16	6	3	7	7682	6428.58	7842.26	12688.2	16785.7	6622.49	12251.1	13299.4	14032.6	25306.2	30706.5	12690.3	15416.2	13704.5	21509.4	17908	9377.58	9192.27	13398.4	13442.3	0.203245	0.203245
M150T98	150.059	97.911	9.2323	Pyridoxal	[M+H-H2O]+	HMDB0001545	C00250	Organoheterocyclic compounds	Pyridines and derivatives	Pyridine carboxaldehydes	99.291	22	10	3	9	44711	195784	373250	265225	428271	82091.8	366990	339076	74464.3	365087	232353	258379	335802	319389	427138	179017	196365	264564	270743	270787	0.0133258	0.0133258
M169T150	169.103	150.255	3.8683	Pyridoxamine	[M+H]+	HMDB0001431	C00534	Organoheterocyclic compounds	Pyridines and derivatives	Pyridoxamines	160.534	15	6	3	5	20275	9099.45	166886	15603.5	18398.4	9845.41	194456	82663.1	30244.3	241262	174959	22673.9	10734	172873	43593.6	11427.8	29728.7	14626.1	16880.7	14658.1	0.0839944	0.0839944
M170T107	170.086	107.466	8.77808	Pyridoxine	[M+H]+	HMDB0000239	C00314	Organoheterocyclic compounds	Pyridines and derivatives	Pyridoxines	109.079	22	10	3	9	117366	275349	348598	680282	545478	58690.4	1.23938e+06	279569	262993	442216	583108	263105	175735	721646	677339	106312	271896	456684	463358	466364	0.0107207	0.0107207
M378T509	378.21	509.267	1.32076	Pyrimidifen	[M+H]+		C18603	Benzenoids	Phenols	Tyrosols and derivatives	515.717	15	8	1	6	3327	19035.8	19932.8	51813	23602.2	10803.3	33737	15821.8	29457.9	36542.4	35596.4	28297.2	12296.7	19090.3	19380.9	22611.1	36561.3	22052.9	21035.5	21623.3	0.023676	0.023676
M201T362	201.094	361.69	2.17709	Pyroglu-Ala	[M+H]+			Organic acids and derivatives	Carboxylic acids and derivatives	Amino acids, peptides, and analogues	362.885	18	5	3	8	4980	8936.4	8321.05	13638.4	11667.4	9298.17	11161.4	17703	16039.1	15332.8	29809.3	13680.8	18784.8	21432.1	16302.3	18044.6	13502.3	12200.9	12127.1	8960.75	0.166701	0.166701
M212T294	212.11	293.551	6.35117	Pyroglu-His-Arg	[M+2H]2+			Organic acids and derivatives	Carboxylic acids and derivatives	Amino acids, peptides, and analogues	305.396	21	7	2	7	13172	13414	24000.8	27787.8	8669.87	21247.4	7104.54	24177.9	6374.37	11975.6	12249.7	17438.6	4336.82	16273	10461.2	5340.42	44876.7	12955.2	11595.2	12906.1	0.0617857	0.0617857
M243T358	243.141	358.26	6.15881	Pyroglu-Ile	[M+H]+			Organic acids and derivatives	Carboxylic acids and derivatives	Amino acids, peptides, and analogues	359.417	20	8	3	8	34268	35497.2	47654.1	53328.5	37414.4	127886	76697.9	37227	11254.4	81803.9	54094.8	44815.6	42156.8	46782	22209.8	53020.1	26764.4	37618.9	38476.2	37632.2	0.0129555	0.0129555
M227T385	227.11	385.295	9.23603	Pyroglu-pro	[M+H]+			Organic acids and derivatives	Carboxylic acids and derivatives	Amino acids, peptides, and analogues	387.017	13	8	0	5	16095	26750.4	25454.2	37844.5	40154.1	46338.6	52717.6	28599.3	35381.4	52704.3	37610.4	26502.6	37267	27195.9	15085.3	34184.1	18622	29619.6	30226	30029.1	0.0103248	0.0103248
M359T422_2	359.212	422.011	6.82723	Pyroglu-thr-lys	[M+H]+			Organic acids and derivatives	Carboxylic acids and derivatives	Amino acids, peptides, and analogues	441.319	16	8	2	6	7474	17225.8	21911.8	49607.1	6205.64	13621.8	31959.6	16917.6	10800.9	20921.8	41830.2	15145.4	8069.03	22899.7	2718.77	20666.5	30690.9	17821.1	20916.9	17788.6	0.0953617	0.0953617
M72T270_2	72.0838	270.472	7.64466	Pyrrolidine	[M+H]+	HMDB0031641					284.102	33	10	3	9	294279	656057	438495	550943	1.15683e+06	137920	579649	412856	373544	547023	490962	606079	460205	499355	822403	275144	399143	428142	428969	427067	0.0022281	0.0022281
M141T312	141.071	312.229	0.255574	(-)-quebrachitol	[M+H-3H2O]+	HMDB0034221	C08257	Organic oxygen compounds	Organooxygen compounds	Alcohols and polyols	314.761	22	10	3	9	326202	173075	602945	231201	307592	201020	718012	326366	490506	588726	133403	430960	575606	363403	1.09819e+06	203239	191086	379202	391174	379121	0.0181014	0.0181014
M384T388	384.165	387.62	8.75007	Quetiapine	[M+H]+	HMDB0005021	C07397	Organoheterocyclic compounds	Benzothiazepines	Dibenzothiazepines	389.317	14	5	2	6	7105	4179.3	9865.98	17256.1	13222	13757.9	15626.1	7051.54	8768.69	14405.6	13557.2	11180.2	13724.3	10114.2	7902.88	11856.6	8334.15	11425.7	11433.1	10928.4	0.0256873	0.0256873
M487T38	487.357	38.211	7.7983	Quillaic acid	[M+H]+		C08972	Lipids and lipid-like molecules	Prenol lipids	Triterpenoids	42.862	13	5	1	7	121055	101987	133752	133660	256736	72045.8	77028.9	205801	71751.1	69387.2	591845	45471.9	220073	103246	64244.6	155760	181679	214440	182105	215055	0.0924554	0.0924554
M174T220	174.06	220.435	0.0570338	Quinaldic acid	[M+H]+	HMDB0000842	C06325	Organoheterocyclic compounds	Quinolines and derivatives	Quinoline carboxylic acids	221.409	22	10	3	9	62134	82824	139253	6466.95	111624	52725.3	139912	89453.1	55404.1	189707	3099.75	46277.8	58856.2	6457.43	56795.5	9688.47	78624	68982.4	70799.5	68996.2	0.0150178	0.0150178
M325T403_1	325.185	402.594	2.32135	Quinine	[M+H]+	HMDB0000468	C06526				405.576	26	9	1	7	151741	139496	32564.9	486203	166284	64431.4	34024.8	70683	207114	24909.4	352579	202065	291624	262430	239748	172492	84033.2	201224	209161	209162	0.0221914	0.0221914
M146T47_2	146.064	46.8205	5.37742	Quinolin-2-ol	[M+H]+		C06415	Organoheterocyclic compounds	Quinolines and derivatives	Quinolones and derivatives	47.563	22	10	3	9	900739	830498	298757	4.66698e+06	305690	149647	2.8817e+06	814091	1.6762e+06	753962	1.16444e+06	1.16777e+06	1.56696e+06	4.04914e+06	3.41968e+06	398670	2.69243e+06	1.45334e+06	1.49208e+06	1.45426e+06	0.0150739	0.0150739
M128T47	128.053	46.823	7.24628	Quinolin-8-ol	[M+H-H2O]+		C19434	Organoheterocyclic compounds	Quinolines and derivatives	8-hydroxyquinolines	47.658	22	10	3	9	61960	64911.3	26535.4	346692	27073.7	10870.2	215924	77029.5	144732	60226.8	104779	98906.3	143522	324118	258068	35630.5	221791	130371	130392	126625	0.0167974	0.0167974
M342T290	342.128	289.609	5.14762	Rabeprazole	[M+H-H2O]+	HMDB0005026	C07864	Organoheterocyclic compounds	Benzimidazoles	Sulfinylbenzimidazoles	290.346	15	6	3	6	3663	1483.05	2150.43	5525.59	4830.36	4988.11	5235.27	5118.02	4031.97	7105.38	9801.52	5634.96	5806.93	3990.08	7205.54	2161.03	5566.27	5076.39	5288.78	5300.62	0.0241633	0.0241633
M486T203_1	486.21	202.964	0.586725	Rac-n-allyloxycarbonyl-cis-moxifloxacin acyl-.beta.-d-glucuronide allyl ester	[M+H-C9H12O6]+			Organic oxygen compounds	Organooxygen compounds	Carbohydrates and carbohydrate conjugates	204.031	14	7	1	6	5517	4971.56	8657.21	11125	8324.33	4777.27	11266.6	14799.6	6800.97	7944.22	14460.7	10041.4	10646.5	9624.75	15584.4	18299.7	8437.12	9824.65	10267.2	10573.8	0.0368433	0.0368433
M235T344	235.116	344.36	7.76426	Rac-trans-4-cotininecarboxylic acid methyl ester	[M+H]+			Organoheterocyclic compounds	Pyridines and derivatives	Pyrrolidinylpyridines	345.449	19	8	3	8	10094	32503.5	13754.6	7345.93	20178.5	16140.8	16751.5	12998.2	40353.7	16213.4	28100.7	22887.5	38178.7	19255.2	35520.8	11203	22435.7	20397.2	19123.2	19063	0.0385849	0.0385849
M362T146_1	362.317	145.59	0.22893	(r)-(+)-arachidonyl-1'-hydroxy-2'-propylamide	[M+H]+			Lipids and lipid-like molecules	Fatty Acyls	Fatty amides	155.139	19	9	1	6	8016	25825.2	4248.14	10798.1	38489.5	56586.4	8815.17	5305.55	25765.3	3451.82	9332.62	6249.04	18582	7867.3	11742.1	8686.73	12336.2	19368.2	21572.3	20078.9	0.0553096	0.0553096
M232T254	232.159	253.514	5.99391	(r)-butyrylcarnitine	[M+H]+	HMDB0002013		Lipids and lipid-like molecules	Fatty Acyls	Fatty acid esters	255.387	17	6	3	7	258702	8666.74	8507.93	19334.2	46657.1	137975	28827.6	30976.2	24835.7	26161.2	4847.8	11550.2	25397.5	10935.3	4875.04	24956.1	5952.18	698211	690861	690855	0.00612329	0.00612329
M385T233	385.229	233.258	5.98375	Resibufogenin	[M+H]+		C17058	Lipids and lipid-like molecules	Steroids and steroid derivatives	Steroid lactones	234.611	16	10	1	5	12042	32875.8	53610.5	174258	73212.8	27371.6	82662.3	49044.7	56785.4	93802.2	175396	42786.6	138215	176508	74553.7	57647.9	103614	58631.7	60063.4	58580.2	0.014247	0.014247
M304T208	304.132	207.583	6.20983	Retigabine	[M+H]+		C13826	Benzenoids	Benzene and substituted derivatives	Phenylmethylamines	215.016	14	6	3	5	4854	26053.1	8461.3	45765.2	19379.6	10493.8	11098.5	12051	7424.92	13603.6	29265.1	7407.61	14356	15251	9014.84	16835.5	12914.5	13213.8	13176.2	12461.4	0.0327389	0.0327389
M368T223	368.167	222.948	2.15091	Retrorsine n-oxide	[M+H]+		C10333				224.38	16	6	2	8	6631	6456.22	12582.9	7301.51	4852.37	9003.3	12775.4	8637.17	18318.1	22645.5	16852.9	20668.6	13819.4	12744.8	14498.5	5196.03	5969.21	10865.7	9913.47	9922.38	0.0534706	0.0534706
M385T353_1	385.23	352.651	1.27868	Rhynchophylline	[M+H]+	HMDB0037115	C09236				357.547	11	6	0	5	6845	17272.1	7266.36	32863.8	9529.2	8716.23	17383.1	19096.4	16536.5	13258.6	10279.1	17991.1	9665.79	10402.6	8626.79	14100	19618.7	17717.9	18498.2	17725.6	0.0249299	0.0249299
M267T244	267.067	243.803	3.49347	Ribavirin	[M+Na]+	HMDB0014949					245.008	22	10	3	9	26915	54013.8	66937.2	68508.4	89681.4	42221	34173.8	44852.4	62869.7	59332.8	60591	111868	78647.9	83424.3	71333	42660.9	52164.7	58563.1	59223.3	58567.4	0.00646349	0.00646349
M399T213	399.142	213.337	2.42025	(-)-riboflavin	[M+Na]+	HMDB0000244	C00255	Organoheterocyclic compounds	Pteridines and derivatives	Alloxazines and isoalloxazines	214.871	17	6	3	8	19648	41090.8	66621.1	43176.5	65666.7	49262.8	71720.5	57353.2	75228.3	55082.5	46759.4	53258.2	56708.5	47438.7	53437.6	34161.1	42582.9	48766.5	47449.7	48015.9	0.0137398	0.0137398
M377T213	377.159	213.305	6.98472	Riboflavin	[M+H]+	HMDB0000244	C00255	Organoheterocyclic compounds	Pteridines and derivatives	Alloxazines and isoalloxazines	214.231	16	6	2	8	30836	53621.8	86144	65214.9	77370.7	59602.8	100646	93250	18573.5	77831.4	79873.8	60600.6	55704.2	70753.4	67467	48154	65713.5	70490.8	70486.3	69902.4	0.00481448	0.00481448
M383T50	383.086	50.035	2.3372	Rosmarinic acid	[M+Na]+	HMDB0124941	C01850	Phenylpropanoids and polyketides	Cinnamic acids and derivatives	Hydroxycinnamic acids and derivatives	52.075	13	8	1	4	5825	6499.08	19207.9	30138	13153.7	4921.7	4485.74	9471.79	3552.51	12343.5	7348.69	6625.38	16218.1	20393.9	8731.48	3100.18	6745.61	12190.8	11659.1	11662.8	0.025845	0.025845
M517T319	517.185	318.745	8.92958	Rottlerin	[M+H]+		C10721	Phenylpropanoids and polyketides	Diarylheptanoids	Linear diarylheptanoids	331.445	20	8	1	4	10250	81782.9	80871.7	132307	160488	53538.4	83594.8	81486.2	83224	109524	148078	49111.7	164988	87103.8	85618	101125	75878.6	77059.1	74890.7	77051.1	0.0163705	0.0163705
M314T208	314.316	207.543	6.35633	R-palmitoyl-(2-methyl) ethanolamide	[M+H]+			Lipids and lipid-like molecules	Fatty Acyls	Fatty amides	209.141	18	7	3	8	9085	8359.59	6338.74	8487.95	16596.2	12254.9	6970.85	6980.69	9150.39	6536.01	22685.5	5397.21	11409.5	10103.5	4101.71	14387.1	3229.82	9437.87	9437.78	9343.31	0.00580125	0.00580125
M277T412	277.148	412.344	3.48094	Saccharopine	[M+H]+	HMDB0000279	C00449	Organic acids and derivatives	Carboxylic acids and derivatives	Amino acids, peptides, and analogues	421.22	15	8	1	5	3645	27945.8	18367.1	34750.5	40957.2	40238	67730.4	30986.4	9908.21	38489.4	37569.4	18245.3	38704.7	27689.4	47631.5	37556.7	21857.3	37054.9	37008.9	33726.1	0.0531243	0.0531243
M437T36_4	437.317	36.324	6.15445	Saikosaponin b2	[M+H-C12H24O11]+			Lipids and lipid-like molecules	Prenol lipids	Terpene glycosides	48.762	15	7	1	6	74760	143062	134051	148329	128016	90281.2	94682.8	228242	171575	98810.2	193083	113031	245176	154580	124018	177290	134143	158262	158293	152025	0.023112	0.023112
M455T85	455.333	84.832	7.66196	Saikosaponin d	[M+H-C12H22O10]+			Lipids and lipid-like molecules	Prenol lipids	Terpene glycosides	87.11	20	4	2	7	15832	33894.3	36361.4	42755.4	70088.7	28012.7	35320.4	73172.2	32619.6	43495.8	145423	88096.4	46113.4	43863.3	60027.5	46656.1	107580	62315.2	62517.6	68895.8	0.0579508	0.0579508
M577T314	577.176	313.538	3.7715	Saponarin	[M+H-H2O]+		C08064	Phenylpropanoids and polyketides	Flavonoids	Flavonoid glycosides	328.507	15	9	1	2	3337	6718.01	8691.98	8152.78	7924.79	5495.28	7595.09	6768.96	6499.12	7058.65	4484.92	3255.9	13117.7	2238.98	6094.86	5606.82	6764.34	6397.12	6396.58	6250.23	0.013335	0.013335
M336T169_1	336.181	169.061	7.04103	Senecionine	[M+H]+		C06176				170.217	19	10	1	8	23066	46647.3	53101.2	61805.4	40248.3	39889.9	69331.1	144816	50386.6	52515.2	61622.2	45705.2	58121.5	62586.6	61299.2	16303.8	56711.8	75431.5	71366.4	74492.7	0.0288546	0.0288546
M334T352	334.145	352.022	3.53327	Seneciphyllin	[M+H]+		C10391				364.536	15	9	1	4	11725	26146.8	1809.04	12748.9	12990.4	29936.3	12240.1	3124.99	26564.6	11651.7	13922.2	27388.1	20861.9	14689.3	12268.8	32995.2	22330.8	5773.9	10252.6	5704.98	0.359743	0.359743
M262T417	262.16	417.218	2.04725	Ser-Arg	[M+H]+			Organic acids and derivatives	Carboxylic acids and derivatives	Amino acids, peptides, and analogues	418.582	19	8	3	8	25624	58982	77714.3	80871.7	31523.6	196953	134628	5602.31	86478.3	107794	32126.4	82458.1	41750.1	58249.7	17712.4	115725	43990.1	72492.2	73705.7	72494.4	0.0096026	0.0096026
M291T396	291.166	396.153	3.31667	Ser-Gly-Lys	[M+H]+			Organic acids and derivatives	Carboxylic acids and derivatives	Amino acids, peptides, and analogues	397.74	13	5	2	6	7957	13465.6	22085	7719.66	23086.5	24085.7	35135.1	12315.4	10291.7	38502.3	7004.7	13398.3	18292.3	17870.9	10842.6	13013	10542.9	18527	16831.9	16816.3	0.0565338	0.0565338
M219T272	219.14	272.403	7.2796	Ser-Ile	[M+H]+			Organic acids and derivatives	Carboxylic acids and derivatives	Amino acids, peptides, and analogues	278.173	26	10	1	8	27398	35179.1	33125.2	125727	54407.1	135762	181975	56403.5	49737.5	67120	26075.8	36414.3	34938.9	23679.1	16410.2	50086.1	30956.8	43582.4	47405.9	43445.2	0.05017	0.05017
M375T362	375.247	361.748	8.32837	Ser-Leu-Arg	[M+H]+			Organic acids and derivatives	Carboxylic acids and derivatives	Amino acids, peptides, and analogues	376.006	18	7	1	9	12909	25559.2	50994.4	52373.8	25203.8	47019.4	102675	33381.9	39637.2	79872.5	31346.4	26180.9	37563.9	30737	9068.57	71699.1	11853.6	20372.6	21557.6	20394	0.0326403	0.0326403
M308T397_2	308.197	397.339	0.65847	Ser-Leu-Ile-Gly-Lys-Val-Amide	[M+2H]2+			Organic acids and derivatives	Carboxylic acids and derivatives	Amino acids, peptides, and analogues	398.657	16	7	3	6	5218	14580.9	10378.8	32032.1	17880.9	8680.23	11918.3	18627.7	15879.4	13176.2	25018	13479.5	21730.2	22988.8	13616.1	13252	21404.7	16531.4	16410.2	16408.2	0.00429057	0.00429057
M177T124	177.108	124.184	6.783	Serotonin	[M+H]+	HMDB0000259	C00780	Organoheterocyclic compounds	Indoles and derivatives	Tryptamines and derivatives	125.407	22	10	3	9	35889	53454.4	42054.8	70311.6	93841.8	27053.7	81120.4	215695	38934.4	107441	115783	175827	160603	218175	144863	64972.8	77715.8	113042	113567	113042	0.00267687	0.00267687
M253T246	253.125	245.639	9.82674	Ser-Phe	[M+H]+			Organic acids and derivatives	Carboxylic acids and derivatives	Amino acids, peptides, and analogues	250.168	23	10	2	8	10219	13930.2	31274.2	29865.3	14610	43361.7	45470.8	25460.1	18598.4	25311.6	15995.7	22869.1	19546.9	34683.8	20790.9	31151.7	24591.4	23450.8	22176.2	23464.2	0.032123	0.032123
M331T437	331.208	437.29	2.57207	Ser-Pro-Lys	[M+H]+			Organic acids and derivatives	Carboxylic acids and derivatives	Amino acids, peptides, and analogues	441.415	18	8	1	9	4030	10879.8	18283.4	19277.6	12811.4	20310.1	31315.7	10308.5	12157.5	23912.7	12446.8	11223.8	14662.9	13288.3	10389.8	20791.7	4083.53	16427.6	17352.6	16440.1	0.0316907	0.0316907
M205T292	205.125	291.599	6.10627	Ser-Val	[M+H]+			Organic acids and derivatives	Carboxylic acids and derivatives	Amino acids, peptides, and analogues	294.002	22	10	3	9	6024	3339.86	5345.43	12252	5646.07	14119.9	12510.9	3935.51	2965.39	14843.3	4134.78	3829.73	3338.58	5087.72	3249.35	6137.7	2616.64	6245.97	6512.81	6244.05	0.0244099	0.0244099
M333T396	333.225	396.153	1.91895	Ser-Val-Lys	[M+H]+			Organic acids and derivatives	Carboxylic acids and derivatives	Amino acids, peptides, and analogues	396.937	17	7	2	8	14483	12977.1	25656.8	37125.1	20165	47123.3	61036.4	18652.5	25259.3	45144.3	30000.6	14450.1	16903.6	18527.8	6240.31	20834.4	11871.8	24963.8	22856.4	22786.2	0.0525783	0.0525783
M298T99	298.104	98.587	9.95415	S-methyl-5'-thioadenosine	[M+H]+	HMDB0001173	C00170	Nucleosides, nucleotides, and analogues	5'-deoxyribonucleosides	5'-deoxy-5'-thionucleosides	100.539	17	9	1	7	123063	232334	851399	372275	694947	151069	326495	520264	918537	625486	406022	388422	464372	335509	502743	259908	316481	682399	686755	682321	0.00371101	0.00371101
M282T75	282.289	74.778	9.57975	Sphingosine	[M+H-H2O]+	HMDB0000252	C00319	Organic nitrogen compounds	Organonitrogen compounds	Amines	86.179	20	5	3	8	434214	1.59161e+06	1.41244e+06	189970	479917	958523	1.46644e+06	1.78376e+06	5.98348e+06	1.52622e+06	423116	1.19893e+06	834245	1.00171e+06	602226	2.86342e+06	293600	1.82243e+06	1.69501e+06	1.82358e+06	0.0415096	0.0415096
M144T270_2	144.107	270.01	4.56921	Stachydrine	[M+H]+	HMDB0004827	C10172	Organic acids and derivatives	Carboxylic acids and derivatives	Amino acids, peptides, and analogues	271.357	22	10	3	9	397641	357778	555113	168070	826294	1.51705e+06	461048	444668	469172	410986	136259	341043	100256	644921	379120	496011	78889.2	462947	467525	467589	0.00571139	0.00571139
M277T85	277.223	85.44	6.01854	Stearidonic acid	[M+H]+	HMDB0006547	C16300	Lipids and lipid-like molecules	Fatty Acyls	Lineolic acids and derivatives	87.412	17	10	0	7	42649	208917	226016	132058	212684	233544	282407	170870	168804	151461	226384	599822	234888	215645	183788	134080	228184	201632	202707	201625	0.00308261	0.00308261
M168T118	168.118	118.109	4.70125	Suberylglycine	[M+H-CH4O3]+	HMDB0000953		Organic acids and derivatives	Carboxylic acids and derivatives	Amino acids, peptides, and analogues	120.228	21	10	3	8	123317	170810	839137	49894.3	204040	669633	230999	139101	782094	96746.6	23297.5	70792.9	45155.9	52194.8	191725	34832.7	151194	214300	214302	219952	0.0150909	0.0150909
M405T243	405.121	243.096	7.2925	Sulfinpyrazone	[M+H]+	HMDB0015269	C07317	Benzenoids	Benzene and substituted derivatives	Phenyl sulfoxides	245.668	12	8	1	3	4552	14123.5	6283.5	7856.83	5422.03	6435.64	6322.45	6527.14	4415.37	2261.1	6263.31	11758.9	5295.34	14985	12550	7565.28	19409.7	7677.87	7090.49	7672.46	0.0451284	0.0451284
M156T364	156.107	364.178	2.22877	Swainsonine	[M+H-H2O]+		C10173				364.808	22	10	3	9	32427	59429.2	68438	124477	67572.7	11769.7	137476	35095	41141.6	145342	91306.2	42255.3	39673	94330.9	37853.6	31450.1	76812.9	59803.3	62380.4	62365	0.024115	0.024115
M422T337	422.3	337.347	0.18629	Talatisamine	[M+H]+			Lipids and lipid-like molecules	Prenol lipids	Diterpenoids	338.264	11	6	1	4	1859	653.46	5297.49	5668.53	5381.04	7265.12	7712.12	3769.2	2108.34	7761.2	8110.33	1370.06	4381.63	4882.19	4288.21	2258.53	1147.58	4109.43	3975.4	4116.07	0.0195157	0.0195157
M563T287_1	563.331	287.135	5.15274	Tandutinib	[M+H]+			Organoheterocyclic compounds	Diazinanes	Piperazines	288.941	11	5	1	5	4853	7993.39	11877.9	16414.8	10730.8	30227.6	9691.38	10779.5	4878.12	6946.55	10640.4	20057.7	13796.1	6284.74	9365.22	8984.49	14377.5	9320.07	9303.1	9802.13	0.0299043	0.0299043
M373T35_1	373.14	35.0275	3.47533	Tangeritin	[M+H]+	HMDB0030539	C10190	Phenylpropanoids and polyketides	Flavonoids	O-methylated flavonoids	35.683	12	5	1	6	129555	223271	21142.3	54818.2	84300.7	30110.3	64567.6	21860.5	25918.8	21997.4	53853.7	119222	27442.4	49989.4	18055.8	19490.1	51364	65715.1	88201.6	89196.9	0.163864	0.163864
M462T85	462.277	84.657	3.60774	Taurocholate	[M+H-3H2O]+	HMDB0000036	C05122	Lipids and lipid-like molecules	Steroids and steroid derivatives	Bile acids, alcohols and derivatives	89.35	11	8	1	2	11575	36746	44155.6	31315.1	83622.9	15325.5	65960	36494.2	23855.7	44436.9	54586.9	23856.4	50500.7	114909	30994.4	31540.7	21341.4	43657.5	43654.4	45559.4	0.024813	0.024813
M466T35_1	466.313	34.7025	4.84305	Taurolithocholate	[M-H2O+H]+		C02592	Lipids and lipid-like molecules	Steroids and steroid derivatives	Bile acids, alcohols and derivatives	39.582	14	6	1	7	158703	333194	616120	156134	299376	82003.8	211708	178938	387449	327178	192847	137087	297855	195715	158778	251630	92008.9	212752	218929	212736	0.0166242	0.0166242
M464T35_1	464.297	34.702	0.613413	Tauroursodeoxycholic acid	[M+H-2H2O]+		C16868	Lipids and lipid-like molecules	Steroids and steroid derivatives	Bile acids, alcohols and derivatives	36.305	14	6	1	7	261148	595792	838726	231867	886122	135443	554545	499292	864832	545717	255174	295818	547486	636233	337189	463619	237334	445789	445779	434564	0.014654	0.014654
M669T277_1	669.272	276.769	6.29403	Taxinine m	[M+H-H2O]+			Organic acids and derivatives	Carboxylic acids and derivatives	Pentacarboxylic acids and derivatives	282.747	10	7	0	3	2834	4739.2	5806.78	13493.5	15282.2	13082.6	10133.8	11125.7	11259.2	16425.6	21648.7	7157.55	12555.8	9627.66	11064.9	15734.1	6977.44	11863	11834.8	9978.98	0.096181	0.096181
M454T362_1	454.328	362.033	1.80208	Terfenadine	[M+H-H2O]+	HMDB0014486	C07463	Benzenoids	Benzene and substituted derivatives	Diphenylmethanes	362.574	13	8	1	4	375915	3918.47	9905.4	1861.94	11850.8	3758.36	12250.6	1.1611e+06	3797.72	5236	16429.8	10475.8	6824.42	99640	153184	1124.31	182150	94815.8	93489.1	93495.2	0.00813559	0.00813559
M607T156_1	607.328	155.787	2.92964	Terragine e	[M+Na]+						159.986	12	8	1	3	16345	17868.6	33476.8	25211.9	37563.8	23780.8	18534.2	33495.7	48463.7	36502.7	54145.9	21026.7	29613.7	20288.1	13079.2	62131.3	9829.64	23901.2	23900.6	23810.5	0.00218583	0.00218583
M289T36_1	289.191	36.3335	5.80577	Testosterone	[M+H]+	HMDB0000234	C00535	Lipids and lipid-like molecules	Steroids and steroid derivatives	Androstane steroids	42.944	18	7	3	8	28615	64732.4	35453.3	160181	52701.3	48765.1	37033.4	52834.1	103410	35489	130057	98582.4	136592	106440	44623.2	74909.1	75530.8	93297.6	110556	110590	0.0951599	0.0951599
M401T207	401.287	206.953	0.123201	Testosterone enanthate	[M+H]+	HMDB0005814	C08157	Lipids and lipid-like molecules	Steroids and steroid derivatives	Steroid esters	207.851	17	9	1	7	36517	54437.4	60166.7	17843	46680.7	69170.4	71771.9	80357.5	67323.8	59678	13294.5	40596	40461.3	37006.7	68870.8	14983.2	23131.2	44394.6	48407.8	44470.5	0.0501651	0.0501651
M205T36	205.165	36.33	3.0299	Tetradecanedioic acid	[M+H-3H2O]+	HMDB0000872		Lipids and lipid-like molecules	Fatty Acyls	Fatty acids and conjugates	44.204	17	7	2	8	49178	19948.5	40810	64432.3	362390	58765.3	69568	204556	42919.4	42565	467197	65941.3	66860.5	51636	37471.5	233844	127300	95879.5	85022.1	84396.7	0.0730116	0.0730116
M351T34_1	351.262	33.732	9.79361	Tetrahydrocorticosterone	[M+H]+	HMDB0000268	C05476	Lipids and lipid-like molecules	Steroids and steroid derivatives	Hydroxysteroids	35.708	17	9	1	7	195255	167521	172489	120488	178944	287144	195533	300872	189631	101135	235410	189106	380184	191731	135911	130778	123036	202684	202696	200068	0.00749958	0.00749958
M483T436_1	483.23	436.207	1.19611	Tetrahydro-l-biopterin	[2M+H]+	HMDB0059658	C20264	Organoheterocyclic compounds	Pteridines and derivatives	Pterins and derivatives	453.311	11	6	1	4	4839	6043.15	9234.62	9972.68	17500.3	7916.76	11773.1	12597.2	8927.56	12074.1	11214.3	11764	15717.9	9258.13	16794.8	8678.82	9681.04	10849.6	11192.4	10840.4	0.0183059	0.0183059
M275T267	275.118	266.801	9.01914	Tetranorprostaglandin j2	[M+H-2H2O]+			Organic acids and derivatives	Keto acids and derivatives	Medium-chain keto acids and derivatives	271.633	13	8	1	4	9314	11612.3	9725.3	9736.78	32504.5	12070.8	6450.75	7781.97	10934.9	10048.7	8036.62	8616.72	4253.68	8737.16	7830.77	8830.77	8494.21	12488	12279.1	12486.8	0.00968229	0.00968229
M181T61	181.078	61.334	0.415888	Theobromine	[M+H]+	HMDB0002825	C07480	Organoheterocyclic compounds	Imidazopyrimidines	Purines and purine derivatives	62.248	23	10	3	9	39432	56901.6	66195.3	29563.3	56556.1	67751.6	28717.5	34615.5	39539.5	52837	44098.1	32118	30550.9	45071.1	55174.2	34216.5	55597.2	49017.6	47352.4	47361.7	0.0200114	0.0200114
M265T335	265.123	334.844	5.35162	Thiamine	[M]+	HMDB0000235	C00378	Organoheterocyclic compounds	Diazines	Pyrimidines and pyrimidine derivatives	346.932	22	7	3	8	391155	1.10272e+06	3.15398e+06	2.63841e+06	2.14087e+06	462324	4.45868e+06	2.28913e+06	2.16359e+06	4.14559e+06	4.71152e+06	1.70276e+06	2.10207e+06	3.43213e+06	2.52147e+06	545992	1.04904e+06	2.45905e+06	2.41125e+06	2.41139e+06	0.0113543	0.0113543
M191T61	191.11	61.108	3.15228	Thr-Ala	[M+H]+			Organic acids and derivatives	Carboxylic acids and derivatives	Amino acids, peptides, and analogues	62.664	11	5	1	5	4839	18617.9	44424.1	19043.4	18805.1	16558.9	32288.5	37251.1	21261.2	36945.2	43520.9	16536.8	24490.4	24613.8	18586.2	18083.4	21852.1	22161.6	20170.3	21451.2	0.0474658	0.0474658
M390T432	390.217	431.608	5.56509	Thr-Asn-Arg	[M+H]+			Organic acids and derivatives	Carboxylic acids and derivatives	Amino acids, peptides, and analogues	447.374	20	9	1	6	11022	20591.8	33725.3	42478.7	34961.7	22657.3	53401.9	22749.3	42776.4	45667.2	28501.5	44028.8	30248.9	10779.3	8713.96	40679.4	24933.1	27255.8	27430.9	27146.8	0.00525433	0.00525433
M362T442_1	362.211	442.349	8.59845	Thr-Asn-Lys	[M+H]+			Organic acids and derivatives	Carboxylic acids and derivatives	Amino acids, peptides, and analogues	446.055	13	8	0	5	6179	8114.28	23088.9	19781.2	16769.8	25880.1	33140	14489.3	12355.7	34186.9	12855.5	17394.4	13339.2	15110.4	9602.51	15879.8	10029.4	16855.1	17315.6	16854.2	0.015649	0.015649
M377T449	377.213	449.15	4.29916	Thr-Glu-Lys	[M+H]+			Organic acids and derivatives	Carboxylic acids and derivatives	Amino acids, peptides, and analogues	454.594	17	8	1	6	7224	10055.4	19558.1	28042.3	11736.3	14211	21701.6	14522.8	9857.92	36225.9	14279.8	12750.2	19172.4	10160.5	15746.4	29127.6	9635.88	17762.2	18391.8	18312.8	0.0188899	0.0188899
M233T47	233.158	47.2995	5.90622	Thr-Ile	[M+H]+			Organic acids and derivatives	Carboxylic acids and derivatives	Amino acids, peptides, and analogues	48.173	24	9	3	9	45910	115346	207312	166751	276100	99755	344656	286470	161597	170421	319538	269045	260675	126044	158515	167545	172817	187089	187106	181987	0.0159136	0.0159136
M233T248	233.157	248.452	5.38932	Thr-Leu	[M+H]+			Organic acids and derivatives	Carboxylic acids and derivatives	Amino acids, peptides, and analogues	251.544	27	9	3	9	55942	85779.9	112868	274711	82070.2	373721	335052	119696	96120	158227	106831	201126	145243	119475	49658.8	107070	74776.5	64329.1	131192	132980	0.357348	0.357348
M361T359_1	361.253	358.636	8.24196	Thr-Leu-Lys	[M+H]+			Organic acids and derivatives	Carboxylic acids and derivatives	Amino acids, peptides, and analogues	364.656	17	9	1	6	8342	15686.5	34580.6	49677.3	18324.3	71856.9	83234.2	20636.2	20558.6	34247	26078	21406.3	17959.8	25503.6	10641.1	25345.2	18634.2	25059.6	25026.5	26260.9	0.0276366	0.0276366
M251T257	251.115	257.344	0.155669	Thr-Met	[M+H]+			Organic acids and derivatives	Carboxylic acids and derivatives	Amino acids, peptides, and analogues	259.248	17	6	3	8	5148	12570.4	14332.9	29463.5	4835.14	29770.1	21660.9	15035.1	24191.1	11421.6	11839.6	11633.8	14121.9	23469.3	7023.77	15407.3	9998.06	11897.4	11918.9	11388.4	0.0255898	0.0255898
M267T368	267.129	368.498	8.65792	Thr-Phe	[M+H]+			Organic acids and derivatives	Carboxylic acids and derivatives	Amino acids, peptides, and analogues	369.778	20	10	1	9	294817	237629	257713	581722	220789	149413	589412	195474	218308	582463	401689	185413	247444	454462	254629	165167	213323	252101	256244	251975	0.00958496	0.00958496
M377T408	377.226	408.137	8.63455	Thr-Thr-Arg	[M+H]+			Organic acids and derivatives	Carboxylic acids and derivatives	Amino acids, peptides, and analogues	409.479	16	7	3	6	5938	8986.08	15268	20291.9	14886.7	17629	29391.1	11848.1	15773.5	17047.9	13352.9	13416.7	14755.4	11406	11774.5	10890.2	13823	14882.7	14884.6	12698.7	0.0891155	0.0891155
M332T217	332.227	217.442	8.02413	Thr-Val-Leu	[M+H]+			Organic acids and derivatives	Carboxylic acids and derivatives	Amino acids, peptides, and analogues	228.029	33	10	1	8	89569	37540.7	366284	56137.4	62306.4	105080	81209.8	58235.9	84610.8	87910.8	45509.1	140015	69842.9	32512.9	50398.7	105979	47481.1	201535	151902	201760	0.155191	0.155191
M347T384	347.241	383.614	7.79063	Thr-Val-Lys	[M+H]+			Organic acids and derivatives	Carboxylic acids and derivatives	Amino acids, peptides, and analogues	398.657	25	7	3	8	12544	10278	24432.9	44741.9	9703.75	66159	70958.6	9412.15	10399.8	36232.6	10450.8	14098.2	13055.6	11383.5	5711.37	11402.7	8191.91	17842.7	19899	17899.7	0.0631422	0.0631422
M127T100	127.054	99.8535	9.18383	Thymine	[M+H]+	HMDB0000262	C00178	Organoheterocyclic compounds	Diazines	Pyrimidines and pyrimidine derivatives	101.849	22	10	3	9	244354	402422	999096	850252	426582	394874	476364	180093	601943	559494	503308	255498	393064	436863	193178	765142	287765	529889	529059	576994	0.0503171	0.0503171
M385T341_1	385.185	340.672	1.41445	Thyrotropin-releasing hormone	[M+Na]+	HMDB0060080	C03958	Organic acids and derivatives	Carboxylic acids and derivatives	Amino acids, peptides, and analogues	342.736	15	9	1	5	8578	13982.5	17534.3	64477.8	51137.3	11609.7	18646.9	27865.8	17343	14944.4	63167.1	26441.3	33677.9	82562.6	22392.7	14865	19891.2	29356.4	29685.7	28920.2	0.0130953	0.0130953
M494T287	494.332	286.82	0.777128	Tiamulin	[M+H]+		C12065	Lipids and lipid-like molecules	Prenol lipids	Diterpenoids	288.362	11	5	1	5	3211	11148.9	7040.86	28779.4	11829.6	19011	12580	10217.2	11830.7	23166.8	18476.6	7349.2	17311.9	18556.8	13796.8	8832.83	8647.63	12406.2	11761.2	12411.1	0.030657	0.030657
M468T252	468.268	252.236	1.14447	Tobramycin	[M+H]+	HMDB0014822	C00397	Organic oxygen compounds	Organooxygen compounds	Carbohydrates and carbohydrate conjugates	253.018	14	4	3	7	33711	30394	33886.9	112554	116875	11255.4	47617.6	89695	34813.3	160630	206908	32887.9	2639.36	43253.4	89856.8	103066	39566.9	62373.4	62985.2	62376.7	0.00562964	0.00562964
M258T162	258.104	161.948	9.55059	Tolmetin	[M+H]+	HMDB0014643	C07149	Organic oxygen compounds	Organooxygen compounds	Carbonyl compounds	162.647	21	9	3	9	97718	35469.6	431678	33650.5	30230.8	27793.9	77278.4	126259	146044	29017.5	33711.8	18020.7	78083.3	77483.9	21538.7	239840	27813.9	72116.9	72684.9	72280	0.00404177	0.00404177
M416T257_1	416.348	256.78	2.27594	Tomatidin	[M+H]+		C10826	Lipids and lipid-like molecules	Steroids and steroid derivatives	Steroidal alkaloids	257.978	17	9	1	7	10955	45279.3	116943	62012.8	48338.7	35096.5	66804.6	93128.7	37683.9	56737.6	64936.5	27101.4	45772.6	74202.2	61994.7	16410.3	75654.5	72616.5	64437.7	72582	0.0674331	0.0674331
M564T329_1	564.388	328.885	5.89	Torularhodin	[M]+			Lipids and lipid-like molecules	Prenol lipids	Tetraterpenoids	329.979	16	7	1	5	64322	68832.1	122299	117558	99378.5	4058.86	99982.3	26366.6	3617.19	198106	76018.5	27174.3	39795.8	111448	25586.6	10362.3	24876.3	66234.6	67456.1	66218.9	0.0106524	0.0106524
M141T252	141.106	251.559	7.45745	Trans-4-(aminomethyl)cyclohexanecarboxylic acid	[M+H-NH3]+	HMDB0014447	C12535	Organic acids and derivatives	Carboxylic acids and derivatives	Amino acids, peptides, and analogues	252.412	22	10	3	9	11127	22679.5	29884.2	30459.1	17974.4	61473.2	33471.8	21594.8	23791.4	34509.9	27215.7	24572.2	25489.2	33718.1	27616.1	19070.9	28323.7	26266	26826.6	26821.1	0.0120908	0.0120908
M115T184	115.058	183.659	5.42631	Trans-cinnamaldehyde	[M+H-H2O]+	HMDB0003441	C00903				184.386	18	8	3	7	6076	6922.95	5106.71	11131.3	15488.7	7926.11	11832.3	24081.5	5328.95	14681.4	12324.7	15158.5	16000.5	16156.2	17666.6	6573.74	8222.32	12465.8	12468.6	11985	0.0226212	0.0226212
M311T418	311.168	418.273	2.80026	Trans-crocetin	[M+H-H2O]+		C08588	Lipids and lipid-like molecules	Prenol lipids	Diterpenoids	427.072	11	5	0	5	28837	9525.78	16864.3	57534.9	26043.7	33689	24609.8	27088	8069.75	42940.2	29214.6	63679.9	12974.3	23841.4	85178.9	25702.2	130894	39339.5	37515.2	37508.4	0.0276807	0.0276807
M177T34	177.06	33.714	4.23316	Trans-ferulic acid	[M+H-H2O]+	HMDB0000954	C01494	Phenylpropanoids and polyketides	Cinnamic acids and derivatives	Hydroxycinnamic acids and derivatives	46.112	23	10	3	9	82941	198425	208277	273455	386435	320860	192412	213467	212674	235824	216735	194711	213317	297280	228700	126124	171402	198756	196725	202290	0.0141328	0.0141328
M276T54	276.29	54.072	9.11885	Trans-hydroxyperhexiline	[M+H-H2O]+			Organic oxygen compounds	Organooxygen compounds	Alcohols and polyols	55.393	33	7	3	8	26896	138343	126935	103012	131278	101526	101403	119444	121889	84818.8	156178	240325	110210	121476	121534	139202	76479.9	121607	119078	121605	0.012085	0.012085
M165T39	165.133	38.6365	2.92342	Trans-traumatic acid	[M+H-CH4O3]+	HMDB0000933	C16308	Lipids and lipid-like molecules	Fatty Acyls	Fatty acids and conjugates	48.233	34	10	3	9	22814	46898.1	58254	78309	51834.8	34169.6	53650.7	70784	64590.5	10833.2	45337.9	38197.4	65240.5	45645.6	95533.6	73223.8	114198	45804	48205.8	48898.6	0.0340924	0.0340924
M283T56	283.273	56.417	8.71683	Trans-vaccenic acid	[M+H]+	HMDB0003231	C08367	Lipids and lipid-like molecules	Fatty Acyls	Fatty acids and conjugates	58.18	27	6	3	8	67252	278124	360043	205106	99247.8	88731.5	306476	752701	438498	97166.4	158382	381239	280129	116745	330726	109351	344096	222106	222152	213126	0.0237201	0.0237201
M229T83_1	229.15	82.5655	8.40921	Traumatic Acid	[M+H]+	HMDB0000933	C16308	Lipids and lipid-like molecules	Fatty Acyls	Fatty acids and conjugates	84.8	14	8	1	5	10795	20224.8	54143.7	13662.4	17724.3	21493.9	28685	31718.7	37251.3	26454.5	110269	16072.3	35649.6	33074.9	28943.4	13091.2	37961.6	36480.6	34212.3	36541.8	0.0371411	0.0371411
M547T34_2	547.409	33.7165	8.88177	Tri-2-ethylhexyl trimellitate	[M+H]+			Benzenoids	Benzene and substituted derivatives	Benzoic acids and derivatives	35.02	14	8	1	5	66405	31341.2	54757.5	152332	144141	25868.2	27941.2	81288.1	134390	44624.7	68594.8	39672.8	53129.7	112666	29697.7	43681.3	53119.8	80736.1	80759.8	79486.4	0.00906891	0.00906891
M457T352	457.176	352.469	3.44398	Triamcinolone acetonide	[M+Na]+		C08183	Lipids and lipid-like molecules	Steroids and steroid derivatives	Hydroxysteroids	365.398	16	5	1	7	9890	101008	68299.4	72838.7	49652.6	107656	72822.2	40950	93674.3	70547.3	45160.4	69023.9	80142	83593.3	61336.8	156762	58323.3	57253.5	60311.1	57240.3	0.0303614	0.0303614
M479T210	479.229	209.533	5.96824	Triamcinolone diacetate	[M+H]+	HMDB0139638	C08184	Lipids and lipid-like molecules	Steroids and steroid derivatives	Pregnane steroids	210.3	13	7	1	5	8017	9045.17	15732.7	30052.7	21663.2	19695.3	24312.8	14516.3	15969.8	23279.4	24621.7	12713.7	22169.4	20622.4	16257	23104.9	14159.2	20745.1	22696.5	23233.8	0.0589243	0.0589243
M398T174	398.386	174.38	5.3802	Tricosanoyl ethanolamide	[M+H]+			Organic nitrogen compounds	Organonitrogen compounds	Amines	184.864	20	10	1	6	16127	1847.41	5159.1	6531.12	1475.09	1354.23	742.872	3936.65	6262.84	6372.37	8936.38	1672.32	4076.94	5238.66	6056.96	2042.98	4395.76	8947.16	6141.31	6336.19	0.219383	0.219383
M138T283	138.059	283.33	4.10191	Trigonelline	[M+H]+	HMDB0000875	C01004				294.081	21	8	3	9	401921	48219.6	23065.4	44704.4	34239.9	391617	12477.3	12203.2	72663.6	16908.4	10363.4	32896.1	14024.4	72177.8	21948	36950.5	10769.3	130239	133660	130230	0.0150551	0.0150551
M291T200	291.165	200.412	5.73683	Trimethoprim	[M+H]+	HMDB0014583	C01965	Benzenoids	Phenol ethers	Anisoles	201.72	18	9	1	8	26670	40205.1	36501.1	92934	53014.7	4847.56	43632.4	110623	14009	70460.2	25680.2	27480.7	36441.1	61276.9	16502.4	14514.7	60994.5	38949.6	38937.4	39371.2	0.0063188	0.0063188
M457T422	457.176	421.979	0.876448	Trioxsalen	[2M+H]+	HMDB0015575	C09314	Phenylpropanoids and polyketides	Coumarins and derivatives	Furanocoumarins	427.41	11	4	1	6	10295	98384.7	101063	146797	125544	207048	84740.4	101078	174488	46897.3	58600.1	83020.3	141923	140189	49451.4	130725	103409	85237.7	78807	85283.2	0.0448317	0.0448317
M329T286	329.02	285.738	1.99436	Tris(2-chloropropyl) phosphate	[M+H+2i]+			Organic acids and derivatives	Organic phosphoric acids and derivatives	Phosphate esters	287.412	11	7	0	4	12167	10929.3	13112.8	4688.69	12926.6	18002.2	13464.9	26771.4	12397.4	26006.2	11952	14211.2	4979.95	3333.2	19232.6	9971.73	12070.3	11731.1	12460.3	11728.3	0.0352289	0.0352289
M517T430	517.313	429.79	0.143858	Trp-Arg-Arg	[M+H]+			Organic acids and derivatives	Carboxylic acids and derivatives	Amino acids, peptides, and analogues	434.491	17	6	1	6	3684	12331	12803.5	8117.15	7465.37	13503.8	12998.6	9359.55	10754	22491.9	8574.13	8589.69	13429.7	7014.35	8131.42	20596	6333.58	12626.4	13973.5	12617.1	0.0597029	0.0597029
M318T182	318.193	182.416	2.11098	Trp-Ile	[M+H]+			Organic acids and derivatives	Carboxylic acids and derivatives	Amino acids, peptides, and analogues	183.335	17	6	3	8	13707	17517.4	32642	41088.4	24101.3	60692.2	51413	28947.1	31844.1	34253.4	30906.1	38608.2	28812.8	23174.7	18596.4	27014.1	23970	31191	32015.4	32097.6	0.0157832	0.0157832
M492T286	492.222	285.777	6.95496	Trp-Met-Arg	[M+H]+			Organic acids and derivatives	Carboxylic acids and derivatives	Amino acids, peptides, and analogues	291.372	11	6	1	4	3149	6766.04	7427.82	12600.3	6876.01	7642.15	9346	10326.1	7356	17152.3	16601.5	8641.93	12297.1	5516.93	9422.6	10927.6	8052.22	8460.93	8196.52	8199.32	0.0183276	0.0183276
M302T247_1	302.159	247.222	5.08511	Trp-Pro	[M+H]+			Organic acids and derivatives	Carboxylic acids and derivatives	Amino acids, peptides, and analogues	248.928	12	4	1	7	4914	18336.9	26703.8	32135.6	32143.3	32240.9	29021.7	41647.7	26307.1	32665.7	38383	35751.7	29805.1	17211.1	38876.4	33359.2	34564.4	24529.7	28480.7	28514.2	0.0843	0.0843
M443T245	443.271	245.085	1.57598	Turkesterone	[M+H-3H2O]+			Lipids and lipid-like molecules	Steroids and steroid derivatives	Bile acids, alcohols and derivatives	246.472	11	7	1	3	4179	6439.87	8459.04	15792.4	12293.8	16168.7	10071.9	10473.5	3518.92	18261.1	28779.7	7280.41	5465.35	12656.1	9959.95	9174.02	7635.16	8366.59	8292.68	8367.13	0.00513379	0.00513379
M138T209	138.096	209.173	8.7374	Tyramine	[M+H]+	HMDB0000306	C00483	Benzenoids	Benzene and substituted derivatives	Phenethylamines	210.15	22	10	3	8	10596	9411.76	23681.5	21963	53944.8	11902.9	27055.5	35935.6	8131.96	18607.1	11715.6	58376.1	33790.8	31204.1	33331.5	12449.5	43228.2	31993.6	31134.9	31131.1	0.0158131	0.0158131
M296T144_1	296.124	143.94	5.08718	Tyr-Asn	[M+H]+			Organic acids and derivatives	Carboxylic acids and derivatives	Amino acids, peptides, and analogues	146.227	12	7	1	4	3429	22956	18171	20703.3	22295	16417.7	23144.1	14067.5	17694.8	18147.9	29795.8	25967.8	15823.2	29501.4	16697	4881.38	22956.8	18556.7	16333.5	18584.8	0.0724667	0.0724667
M295T206	295.176	205.614	2.31866	Tyr-Ile	[M+H]+			Organic acids and derivatives	Carboxylic acids and derivatives	Amino acids, peptides, and analogues	206.591	17	6	3	8	60409	35707.5	78889	75969.8	47561.3	129506	106829	70889.1	90134.3	81198.5	54962.6	171682	90252.8	47497	73754	62787.1	72289.1	77471.7	80028.3	77400.7	0.0191181	0.0191181
M279T273	279.144	273.19	1.31284	Tyr-Pro	[M+H]+			Organic acids and derivatives	Carboxylic acids and derivatives	Amino acids, peptides, and analogues	275.442	22	10	3	9	11191	11596.7	15190.5	17783.7	19669.8	46481.1	44384.7	17817.4	13226.6	33497	15569.4	10292.4	17461.3	10737.9	13942.3	13666.2	10216.5	14836.8	15201.8	14836.6	0.0140912	0.0140912
M283T65	283.139	65.1145	6.96288	Tyr-Thr	[M+H]+			Organic acids and derivatives	Carboxylic acids and derivatives	Amino acids, peptides, and analogues	67.343	16	8	2	6	4377	29571.5	65333.9	21798.9	16723.6	28617.1	49962.5	68077	35675.8	21366.9	37592.3	48014.3	33139.1	18345	21952.2	27828.2	53128.9	35163.9	38578.5	35226.2	0.0537859	0.0537859
M591T250	591.328	249.719	4.615	Urobilin	[M+H]+		C05794	Organoheterocyclic compounds	Tetrapyrroles and derivatives	Bilirubins	252.084	13	9	1	1	27916	23566	20960.2	49550.7	82651.9	42448.6	37977.1	83384.4	31246.5	123946	186192	23604.9	21089	29235.3	59218.4	187877	29905.9	33718.3	36044.8	36373.3	0.0409112	0.0409112
M139T291_2	139.055	291.07	0.76337	Urocanate	[M+H]+	HMDB0000301	C00785	Organoheterocyclic compounds	Azoles	Imidazoles	293.342	22	10	3	9	335302	460991	431377	415773	297066	836494	175981	436036	892268	799317	406334	777237	357213	359330	417906	525242	624429	400731	400669	394530	0.0089353	0.0089353
M355T228	355.276	227.954	1.53891	Ursocholic acid	[M+H-3H2O]+	HMDB0000917	C17644	Lipids and lipid-like molecules	Steroids and steroid derivatives	Bile acids, alcohols and derivatives	241.663	12	4	2	6	368339	16783.4	12435.7	13138.7	24474.9	1.0468e+06	7989.69	11218.7	33105.8	32049.8	21731.8	16577.2	24008.7	7575.61	17717.8	50021.8	28190.5	90926.2	92083.2	90903	0.00739022	0.00739022
M411T35_1	411.339	35.3365	0.669512	Ursolic acid methyl ester	[M+H-C2H4O2]+			Lipids and lipid-like molecules	Prenol lipids	Triterpenoids	38.953	16	8	1	7	68523	146262	110884	141685	183422	104934	105321	162928	117024	85936.4	460716	88092.8	165406	158010	89535.3	137048	115785	137462	158857	133977	0.0939247	0.0939247
M189T257_2	189.13	257.363	8.38653	Val-Ala	[M+H]+			Organic acids and derivatives	Carboxylic acids and derivatives	Amino acids, peptides, and analogues	262.454	19	6	3	8	10719	8516.02	25964.3	29313.1	13734.9	22507.6	38182.8	16606.5	35028.4	36849.6	40774.6	36263.5	45419.1	14936.9	17394.9	14445.4	40327.9	16862.8	18055.1	16871.6	0.0397281	0.0397281
M389T450	389.207	449.789	6.10617	Val-Asp-Arg	[M+H]+			Organic acids and derivatives	Carboxylic acids and derivatives	Amino acids, peptides, and analogues	451.177	16	7	1	7	11184	22646.2	10931.1	97297	39747.1	9249.08	17168.9	56953.9	9285.84	21863.2	76375.3	36469.8	50185.3	58586.6	49902.9	29595	49939	42242.1	41309	42242.6	0.0128517	0.0128517
M189T101	189.17	101.262	1.7666	Valerenic acid	[M+H-CH2O2]+		C09743	Lipids and lipid-like molecules	Prenol lipids	Sesquiterpenoids	103.991	20	9	3	8	8942	24815.9	39195.5	29352.5	27762.6	23267.9	52107.8	81809.6	30236.3	16736.1	46984.9	27189.9	80167	18385.8	30399.4	61573.4	31021.6	39554.9	46449.3	40220.6	0.0903845	0.0903845
M247T377	247.139	377.287	1.73584	Val-Glu	[M+H]+			Organic acids and derivatives	Carboxylic acids and derivatives	Amino acids, peptides, and analogues	392.992	33	8	3	9	76937	36771.2	102201	127992	45515.6	82925.8	193785	84133.3	48817	73548.9	174164	90987.1	10205.7	127902	63327.7	47638.3	37908.6	66969.5	67115.2	77108	0.082558	0.082558
M188T331_2	188.135	330.592	5.76211	Val-Glu-Lys	[M+2H]2+			Organic acids and derivatives	Carboxylic acids and derivatives	Amino acids, peptides, and analogues	341.23	18	8	3	6	6074	8492.45	6512.03	19960.3	8451.8	9037.5	8907.3	9209.12	7608.45	9036.56	16141.2	9971.23	7986.89	17087.9	10691.9	5848.14	23867.5	8649.32	8648.11	8503.24	0.00976574	0.00976574
M274T256	274.184	255.533	4.6271	Val-Gly-Val	[M+H]+			Organic acids and derivatives	Carboxylic acids and derivatives	Amino acids, peptides, and analogues	262.532	17	8	3	6	3324	7898.24	14446.5	39496.5	10570.4	18550.9	23092.9	10989.5	8090.84	31095	10644.5	14869.1	11826.2	15408.2	10353.5	10811.5	11173.1	10324.8	10738.2	10683.7	0.0212257	0.0212257
M411T403	411.232	403.081	2.0517	Val-His-Arg	[M+H]+			Organic acids and derivatives	Carboxylic acids and derivatives	Amino acids, peptides, and analogues	409.793	15	9	1	3	8906	15941.4	41275.1	54063.2	83072.3	92173.3	30518.6	33788	70689.5	50888.1	40400.3	53886.9	58261	49179.5	54722	48609.8	97518.8	62462	45951.7	62500.9	0.167513	0.167513
M249T202	249.135	202.355	0.111644	Val-met	[M+H]+			Organic acids and derivatives	Carboxylic acids and derivatives	Amino acids, peptides, and analogues	204.031	22	10	3	9	25487	14696.7	32552.5	41166.3	24782.1	56400.7	77258.6	31187.3	28789.6	35538.3	28801.3	33463.4	36163.7	19515.5	17128.4	30474.5	24301.8	27364.1	28758.7	27370.5	0.0288642	0.0288642
M215T262	215.145	261.804	6.21119	Val-Pro	[M+H]+			Organic acids and derivatives	Carboxylic acids and derivatives	Amino acids, peptides, and analogues	263.744	19	7	3	9	12626	8963.2	14051	46700.6	19036.1	35389.8	32440	13021.1	15554.1	33867.3	14151.4	8772.07	19151.8	20066.4	11506.3	9421.06	6066.46	17575.5	19904.9	17567.3	0.0734232	0.0734232
M219T55_1	219.143	55.424	3.5778	Val-Thr	[M+H]+			Organic acids and derivatives	Carboxylic acids and derivatives	Amino acids, peptides, and analogues	56.723	19	8	3	8	9769	40201.1	62590.3	44616.5	44867.2	32977.1	69054.8	68039.9	42096.5	49489.9	99015.7	43077	57270.1	28596.9	37878.3	52036.2	42172.8	54701.8	54696.7	52219.5	0.0265755	0.0265755
M188T292	188.135	292.191	0.040044	Val-Thr-Arg	[M+2H]2+			Organic acids and derivatives	Carboxylic acids and derivatives	Amino acids, peptides, and analogues	294.876	16	7	2	7	11737	4921.32	3953.33	38394.4	7370.12	10038.1	3801.17	31061.7	4453.26	5893.87	7241.8	3392.36	2962.75	42123.8	5027.34	7959.19	5938.7	9328.46	14487.7	8486.09	0.301768	0.301768
M304T197	304.176	196.793	1.09614	Val-Trp	[M+H]+			Organic acids and derivatives	Carboxylic acids and derivatives	Amino acids, peptides, and analogues	204.954	16	8	2	6	7166	10245.2	22722.6	32759.1	17817.5	29749.3	28653.6	10581.4	15426	36596.8	22228.6	15364	23099.2	17716.9	13221.3	11511.8	12647.6	20028.6	22084.1	22079	0.0553937	0.0553937
M281T223	281.159	223.124	2.00054	Val-Tyr	[M+H]+			Organic acids and derivatives	Carboxylic acids and derivatives	Amino acids, peptides, and analogues	234.072	22	10	3	8	11547	14219	26497.1	28410.3	26947.7	45806	34148.7	19724	29170	48173.7	24923	23835.7	27759.1	18899.2	17982.8	25462.7	23661.1	25070.9	26177.9	25059.9	0.0252525	0.0252525
M217T215	217.163	214.712	6.46925	Val-Val	[M+H]+			Organic acids and derivatives	Carboxylic acids and derivatives	Amino acids, peptides, and analogues	241.891	28	10	3	9	82492	28837.6	60006.8	161624	62292	163493	268727	29306.5	27371.6	162737	42077.9	23013.7	44087.2	47793.2	20806.6	27157.4	14908.9	58856.8	61838.2	58851.8	0.0287851	0.0287851
M373T327_1	373.266	327.188	1.29577	Val-Val-Arg	[M+H]+			Organic acids and derivatives	Carboxylic acids and derivatives	Amino acids, peptides, and analogues	328.424	18	8	1	9	9905	9020.67	23032.3	27989.3	11626.7	17005.2	30292.7	8938.83	5210.4	45289.5	5766.27	8333.5	11022.9	15504.8	6142.17	9158.84	8184.22	15268.1	15268.3	14985.9	0.0107419	0.0107419
M345T342	345.261	342.334	3.31396	Val-Val-Lys	[M+H]+			Organic acids and derivatives	Carboxylic acids and derivatives	Amino acids, peptides, and analogues	345.275	15	4	3	7	5372	1306.46	10771	4419.18	4174.57	8793.61	34795	4525.31	1319.5	26642.7	2929.82	2175.22	1997.35	6559.4	1874.45	2958.7	627.967	6040.42	4403.32	4208.71	0.205988	0.205988
M392T194	392.275	193.913	1.84906	Veratramine	[M+H-H2O]+		C10829				194.992	14	5	2	7	4490	11826.7	10349.8	11114.8	11779.7	7243.85	13977	11188	9463.36	15472.2	8657.8	12270.5	18706.5	10269.2	9961.19	8802.54	10032.5	13673.7	11837.2	11817.9	0.0856633	0.0856633
M355T404_1	355.205	404.307	0.686238	Vincamine	[M+H]+		C09251				414.025	18	8	2	7	40829	28087.4	19861.7	325861	8999.25	19014.5	24447	32332.4	20536.3	15822.9	227434	54833.7	44127.9	126963	35283.6	54933.1	113724	63024.9	63001	25751.9	0.425215	0.425215
M471T351_2	471.277	350.534	8.33834	Withaferin a	[M+H]+		C08841	Lipids and lipid-like molecules	Steroids and steroid derivatives	Steroid lactones	353.075	15	5	2	8	39833	33622.4	43826.9	135158	179072	17899.7	66327.5	102776	41562.4	225361	303920	24670.7	63944.3	49540.6	80448.4	131340	46627.2	60166.2	60683	59710.5	0.00808425	0.00808425
M455T240	455.263	239.877	0.386611	Withanolide b	[M+H]+			Lipids and lipid-like molecules	Steroids and steroid derivatives	Steroid lactones	252.779	12	4	1	6	4705	3594.42	14510.3	9090.12	7845.28	11293.4	14321.9	9173.99	7098.6	8261.44	9695.79	17147.1	10011.6	3740.12	11896	8267.58	4192.13	7787.12	8069.59	7782.5	0.0208678	0.0208678
M429T350	429.157	350.175	9.75052	Wortmannin	[M+H]+		C15181	Lipids and lipid-like molecules	Steroids and steroid derivatives	Oxasteroids and derivatives	351.359	11	7	1	3	7405	13741.9	8906.86	14626.6	15711.8	9647.77	16950	9321.8	27761.6	11010.5	7525.09	7863.34	25132.1	8188.72	10845.3	20370.3	11538.6	10193.4	10376.2	10193	0.0103051	0.0103051
M447T201	447.412	200.94	4.59894	Xestospongin c	[M+H]+						201.442	14	4	3	7	47718	10347.5	18295.8	7688.17	1747.44	6525.73	14498.7	15242.1	19702.9	100809	4372.83	126340	7977.5	15173.7	43290.8	3660.61	30754.6	30163.6	29004.7	30148.4	0.0223269	0.0223269
M381T51	381.196	51.409	4.09042	(z)-3-(4-hydroxyphenyl)-n-[4-[[(e)-3-(4-hydroxyphenyl)prop-2-enoyl]amino]butyl]prop-2-enamide	[M+H]+			Phenylpropanoids and polyketides	Cinnamic acids and derivatives	Hydroxycinnamic acids and derivatives	52.59	13	3	3	7	23583	45363.4	29177.9	22473.3	141789	31305	22457.6	25302.6	31577.6	27431.2	43809.3	33470.8	36036.5	18117.2	56165.2	18547.9	83156.4	58902.1	57910.2	57884.4	0.00996422	0.00996422
M119T36	119.089	35.695	3.3618	Zerumbone	[M+H-C6H12O]+		C20262	Lipids and lipid-like molecules	Prenol lipids	Sesquiterpenoids	50.722	23	10	3	9	286555	246019	326411	234856	335335	262163	194664	358632	371968	212648	360632	283409	301289	281115	212485	317270	318087	338212	342585	338124	0.00750939	0.00750939
M191T368	191.112	368.462	1.98618	Z-ligustilide	[M+H]+						369.778	22	10	3	9	23066	16566.1	28838.2	40552.6	24609.4	14888	55507.8	21837.7	18391.7	45771.3	29167.2	16541.3	20238.3	27302.9	22189.8	12065	24174.1	23788.2	23299.7	23299.8	0.0120211	0.0120211
M325T158_1	325.283	158.273	6.64207								159.316	20	10	1	9	14272	39901.5	39046.6	23973.1	34981.8	18347.2	37661.9	34789.4	77848.3	38694.9	62066	44082.5	43212.5	32485.7	37408.1	58948.9	33859.8	39181.5	39700.7	39707.7	0.00763504	0.00763504
M497T229	497.318	229.263	2.00993					Lipids and lipid-like molecules	Steroids and steroid derivatives	Steroid esters	230.424	13	6	1	6	149381	20877	20558.4	10497.8	36964.9	909397	15082.1	20492.2	16216.3	27127	12132.4	22624.6	16384.3	13653.4	12651.4	5573.86	17394.7	91346.9	91348.8	88755	0.0165438	0.0165438
M315T159	315.261	158.679	6.67951					Lipids and lipid-like molecules	Fatty Acyls	Fatty acids and conjugates	162.608	19	8	2	8	15870	33921.6	78164.4	13868.9	25846.4	25335.7	102898	17895.9	35834.4	92419.3	48850.8	59825.5	28394.9	12489	25902.5	10299.1	11848	42027.3	37669.1	37625.1	0.0646688	0.0646688
M433T198	433.244	197.754	5.48756					Lipids and lipid-like molecules	Glycerophospholipids	Glycerophosphates	198.862	16	8	0	6	12458	10622.8	3402.72	6677.25	11484.9	6795.94	17255.2	15088.2	19525.5	13937.3	24781.3	11704.2	14290.6	10964.4	14588.1	19990	5062.7	7190.67	8213.6	7283.97	0.0747854	0.0747854
M533T154_1	533.301	154.126	6.07645					Lipids and lipid-like molecules	Glycerophospholipids	Glycerophosphoglycerols	154.825	16	7	1	8	254358	488594	23601.9	97999.9	196752	299539	331908	523286	925995	490004	411070	1.01662e+06	432128	298539	456834	713881	357792	471783	473348	473350	0.00191192	0.00191192
M449T157_1	449.279	156.746	6.43129					Lipids and lipid-like molecules	Glycerophospholipids	Glycerophosphoglycerols	172.427	15	7	1	6	230615	187036	370672	111222	149811	147711	237979	551779	488727	371067	499033	502895	377615	231208	309956	928930	215300	338534	338543	336084	0.00419602	0.00419602
M464T342_1	464.314	341.815	3.22156			HMDB0011130		Lipids and lipid-like molecules	Glycerophospholipids	Glycerophosphoethanolamines	358.063	12	6	0	5	2298	2726.42	5765.8	7355.43	6177.17	9678.18	11366.8	4903.71	5548.54	8355.05	9046.22	2829.7	2103.33	6553.21	4918.45	2796.17	3791.44	4575.67	4732.64	4576.83	0.0195086	0.0195086
M192T221	192.071	221.173	0.0863664			HMDB0035514	C22202	Organoheterocyclic compounds	Indoles and derivatives	Indolyl carboxylic acids and derivatives	225.754	21	9	3	9	99104	158155	264198	30959.7	192345	148819	330645	172151	177187	410233	10400	131956	156220	109158	200051	26950.3	224783	152444	156170	152503	0.013884	0.013884
M517T139_1	517.304	138.83	7.35189					Lipids and lipid-like molecules	Steroids and steroid derivatives	Bile acids, alcohols and derivatives	139.754	14	7	1	6	40343	139939	217703	40890.4	97398.6	108536	265166	237539	315009	218002	209511	321326	139255	92045.2	168866	166280	223817	159609	159615	161350	0.00626169	0.00626169
M208T267	208.067	266.742	3.32708			HMDB0000732	C02794	Organic oxygen compounds	Organooxygen compounds	Carbonyl compounds	268.374	21	10	2	9	58206	27117.5	55137.3	12487.8	38398	28451	85955.8	34527.2	23858.4	147620	6602.9	15618.4	27516.9	8550.52	32473.6	14169.1	27486.7	31410.6	32199.2	31413.6	0.0143465	0.0143465
M219T413	219.105	412.509	0.605247			HMDB0006248	C03740				415.696	22	10	3	9	194914	92706.5	321236	100708	144327	43586.7	239686	213694	71249.1	475888	83259	133906	226535	83413.3	208574	93340.9	79643.2	113854	119582	113954	0.028315	0.028315
M699T198_1	699.338	198.397	5.99758					Lipids and lipid-like molecules	Steroids and steroid derivatives	Steroidal glycosides	200.162	11	7	1	3	13452	3360.12	1887.28	1936.52	4848.1	2822.35	3206.17	2230.45	12821.5	4185.62	8457	4373.22	1968.97	3490.9	2069.78	16171.2	2114.62	2067.3	4187.87	3000.6	0.344483	0.344483
M453T38	453.353	38.283	1.21668			HMDB0035782	C08617	Lipids and lipid-like molecules	Prenol lipids	Triterpenoids	56.649	15	5	2	7	122729	114387	74377.1	134590	897444	141866	75791.8	379096	123802	88940.1	1.63877e+06	115087	180440	164606	52742.4	588940	102702	314019	312374	314018	0.00302934	0.00302934
M134T407	134.048	407.321	3.61785			HMDB0000191	C00049	Organic acids and derivatives	Carboxylic acids and derivatives	Amino acids, peptides, and analogues	415.036	27	10	3	9	21119	38096	80369	44117.9	38095.3	31794.7	67679.1	162112	56648.5	90638.5	61652.3	73118.6	93409.2	51726.1	134805	79960.9	69383.5	69089.1	69229.2	76795.7	0.0614959	0.0614959
M355T39_4	355.273	38.9345	3.73367			HMDB0000619	C00695	Lipids and lipid-like molecules	Steroids and steroid derivatives	Bile acids, alcohols and derivatives	48.723	16	7	1	6	139957	329018	271162	187004	141034	267563	183901	419129	448826	70012.1	161598	189206	456629	235422	107423	666667	283590	360512	321119	360903	0.0657737	0.0657737
M608T232	608.324	231.94	6.254				C11308	Organic acids and derivatives	Carboxylic acids and derivatives	Amino acids, peptides, and analogues	238.107	11	4	0	7	3183	5835.65	17338.2	9269.12	14355.1	9903.56	10171.8	6370.43	6513.69	12048.8	10237.9	10524.2	10357	8572.98	10757.2	11130.9	6102.5	10076.2	10095.9	9769.41	0.0183438	0.0183438
M391T258	391.109	258.013	2.43654			HMDB0002269	C10443	Phenylpropanoids and polyketides	Diarylheptanoids	Linear diarylheptanoids	263.104	14	4	2	8	8371	7430.31	16328.7	89881	8198.46	11996.9	10888.4	10951.8	7996.25	6137.34	8927.9	9904.45	9058.54	7247.94	8287.77	7566.73	5899.45	10439.5	8870.25	10494.3	0.0928282	0.0928282
M195T244	195.144	244.234	1.10098			HMDB0000623	C02678	Lipids and lipid-like molecules	Fatty Acyls	Fatty acids and conjugates	263.061	31	10	3	8	9206	13409.9	25306.2	27149.7	28922	6720.32	9157.81	16623.6	31529.2	59612.5	28886.8	12155.1	14935.7	21587.1	27597.1	8631.6	20636.8	14777	15217.6	14770.9	0.0171674	0.0171674
M437T39_1	437.356	38.5705	8.87851				C08942	Lipids and lipid-like molecules	Prenol lipids	Triterpenoids	54.072	18	7	1	8	248846	281642	142690	132085	700808	332381	143867	445864	43215.6	70775.3	1.92463e+06	106844	72326.8	201766	126395	476946	262056	343599	344455	336768	0.0123314	0.0123314
M299T135	299.136	135.264	1.59465			HMDB0006101	C18165	Lignans, neolignans and related compounds	Furanoid lignans	Tetrahydrofuran lignans	136.619	24	10	2	9	10791	43378.4	37089.5	53310.9	25619.8	72751.8	34766.5	20764.2	30797.3	56963.4	27870.9	33869.8	31055.9	28500.4	63570.7	23598.1	41789.5	40500.7	44363.9	40478.5	0.0535371	0.0535371
M651T285	651.272	285.05	9.37374				C10062	Organoheterocyclic compounds	Benzopyrans	1-benzopyrans	290.812	12	8	0	4	2004	5265.07	7597.19	10051.8	6078.22	6491.82	8647.74	938.831	7290.18	12647.6	13797.5	5719.73	5943.34	5220.06	7278.79	6520.25	6777.15	8268.46	8783.7	8605.21	0.0305922	0.0305922
M260T161	260.082	160.641	3.57255			HMDB0011737	C05282	Organic acids and derivatives	Carboxylic acids and derivatives	Amino acids, peptides, and analogues	176.362	23	10	3	8	16396	28705.7	17083.3	16477.4	12080.7	11184.9	22226.2	9556.85	90961.3	5483.46	5865.38	42657.2	19167.4	13216.1	10982.3	18810.4	20376.6	21178.9	21156.9	21706.6	0.0145795	0.0145795
M271T39_1	271.067	38.9855	4.27893			HMDB0003217	C06563	Phenylpropanoids and polyketides	Isoflavonoids	Isoflav-2-enes	42.787	16	8	1	5	366007	70770.7	21529.1	25047.7	25887.2	95679.5	19117.6	24995.1	47184.8	10802.4	35907.4	21876.2	19303.4	17464.6	9095.15	15845.4	16663.4	79731.1	84230.5	84257.8	0.0314926	0.0314926
M275T368	275.144	367.916	6.04601					Organic acids and derivatives	Carboxylic acids and derivatives	Amino acids, peptides, and analogues	369.158	22	10	3	8	25363	11830.8	22375.2	23116.9	9637.89	28028.5	32095.2	12320.9	19453.6	18909.1	10057.6	29164.6	21314.4	9384.4	18400	10858.6	14198.1	16192.7	16190.5	17520.9	0.0461371	0.0461371
M189T283	189.13	283.33	5.92786			HMDB0000759	C02155	Organic acids and derivatives	Carboxylic acids and derivatives	Amino acids, peptides, and analogues	293.58	21	8	3	9	18138	12435	17238.7	43384.8	17815.6	83666.2	47108.4	11931.8	19622.2	22395.4	17898.6	16527.1	19241.6	17750.1	11008.2	15108.4	12694.3	18753.6	19203.9	18749.6	0.0138161	0.0138161
M269T93	269.22	92.932	2.69453			HMDB0000672	C19615	Lipids and lipid-like molecules	Fatty Acyls	Fatty acids and conjugates	105.182	23	10	3	9	21066	105532	99483.9	37834.5	87862	150980	61321.4	106490	147643	69697.8	109515	226460	87269.6	76562.9	121163	78458.4	250086	144272	141440	141435	0.0114962	0.0114962
M243T100	243.105	99.854	6.38857			HMDB0000273	C00214	Nucleosides, nucleotides, and analogues	Pyrimidine nucleosides	Pyrimidine 2'-deoxyribonucleosides	100.712	18	4	3	9	9416	10944.5	62954.5	29063.4	11512.3	15557.8	14469.8	88435.7	11819.7	68353.7	14505	58632	67795.1	66155.9	71079.1	21034	13795.9	16629.8	15899.2	16628.1	0.0257126	0.0257126
M261T361	261.152	361.159	3.95059					Organic acids and derivatives	Carboxylic acids and derivatives	Amino acids, peptides, and analogues	362.746	18	10	1	7	77757	66304.4	134178	104231	63251.4	193103	278430	84771.9	93091.8	147248	77030.5	85684.3	130171	78019.2	63641	94218.7	64251.8	93733.5	93734.8	92229.9	0.00931516	0.00931516
M229T38	229.164	38.314	5.39223					Organic acids and derivatives	Carboxylic acids and derivatives	Amino acids, peptides, and analogues	49.281	15	6	2	6	68063	154288	105153	43834.7	53294.5	104398	57798.2	62292.2	31064.3	46598.1	129328	41749.1	39767.6	25002.9	30814.6	97365.9	19388.7	55255.3	75363.2	60280	0.164457	0.164457
M692T131	691.53	131.198	7.73474					Lipids and lipid-like molecules	Prenol lipids	Terpene glycosides	147.122	14	7	1	4	7111	11124.3	12718.1	15716.7	9053.69	9797.94	11838.7	15347.5	6717.77	12988.8	13364.7	9206.36	8837.79	26254.9	10533.9	15504.4	18784.7	11909.6	10998.9	6625.15	0.286964	0.286964
M190T188	190.057	187.755	1.34664			HMDB0000715	C01717	Organoheterocyclic compounds	Quinolines and derivatives	Quinoline carboxylic acids	189.772	14	5	3	6	20660	15183.6	9086.13	16648.3	8371.71	55756.3	15552.6	6828.54	8165.31	16660.1	8062.35	13438.9	9337.39	11044.7	8295.49	11733.5	6912.65	14674.4	15612.9	15606	0.0352878	0.0352878
M281T46	281.257	46.169	5.0922			HMDB0000673	C01595	Lipids and lipid-like molecules	Fatty Acyls	Lineolic acids and derivatives	47.563	25	10	3	9	3234814	1.7825e+06	3.60057e+06	1.50786e+06	1.24101e+06	982758	2.24478e+06	9.81351e+06	6.67066e+06	1.39854e+06	3.1832e+06	1.00481e+07	5.05637e+06	1.55224e+06	5.23235e+06	1.34392e+06	2.69363e+06	3.71675e+06	3.44763e+06	3.43254e+06	0.045271	0.045271
M277T451	277.149	451.479	5.68498			HMDB0062698	C00449	Organic acids and derivatives	Carboxylic acids and derivatives	Amino acids, peptides, and analogues	456.629	11	4	1	6	7952	18572.6	11683	38785.8	38161.7	15730.3	17165.9	16475.8	21751.2	39301.5	39696.4	15751.9	18365.5	26682	15179.2	15290.5	10365	21816.1	19388	19402.3	0.0691885	0.0691885
M311T205	311.191	204.917	2.6666			HMDB0015446	C07618	Lipids and lipid-like molecules	Steroids and steroid derivatives	Estrane steroids	206.26	13	8	1	4	10107	23164.3	14329.3	33397.5	60380.2	30272.5	81452.1	29256	32602.4	18402.9	61902.5	19148.4	17569.7	18013.5	24639.8	20537.8	24284.5	33630.4	32267.7	33688.9	0.0242244	0.0242244
M302T274_1	302.062	273.831	0.707968			HMDB0001367	C04256				274.957	11	6	1	4	8539	15266.4	25783.7	10167.6	3111.58	35242.8	21376.1	34484.8	35344.9	22373.3	32858.6	4994.59	24065.5	7941.17	5834.59	21463.6	13082.6	16140	14510.2	16162.8	0.060726	0.060726
M189T314_1	189.093	314.129	7.31979			HMDB0006029		Organic acids and derivatives	Carboxylic acids and derivatives	Amino acids, peptides, and analogues	316.641	20	10	1	9	14236	17183.2	5230.54	6254.43	14074	13438.2	7693.61	9712.28	18570.9	6262.98	8031.64	20659.6	13566.8	10026.5	8994.89	10491.4	13365.8	13158.8	12519.7	13149.4	0.0283	0.0283
M158T322	158.05	321.81	5.02386			HMDB0000812	C01042	Organic acids and derivatives	Carboxylic acids and derivatives	Amino acids, peptides, and analogues	323.364	16	7	3	6	8350	10365.5	10001.8	23653.4	4252.67	4605.17	3323.86	4113.95	12605	15198.7	1419.57	20742	2460.07	15519.2	5717.71	5003.09	5630.82	5165.54	5700.86	5141.58	0.0592609	0.0592609
M190T390	190.077	389.926	2.67104			HMDB0001138	C00624	Organic acids and derivatives	Carboxylic acids and derivatives	Amino acids, peptides, and analogues	391.617	22	10	3	9	69786	53806.9	33727.4	33400.2	53290.9	32578.4	65900.3	121600	108122	46139.3	94676.1	117855	79092.8	37663.2	81342.4	38864.3	119439	63334.5	62158	62162.6	0.010838	0.010838
M316T312	316.111	312.278	2.93942			HMDB0060493	C02713	Organic oxygen compounds	Organooxygen compounds	Carbohydrates and carbohydrate conjugates	328	25	10	2	9	75600	79735.9	71960.4	63416.1	59600	139345	43941.8	30131.2	113859	90872.8	55799.4	32716.8	81476.3	80146.3	43535.6	29082.3	53187.1	44452.1	46838.8	44265.7	0.0317534	0.0317534
M348T398	348.098	398.207	0.669126			HMDB0000833	C03410	Organic oxygen compounds	Organooxygen compounds	Carbohydrates and carbohydrate conjugates	407.033	15	8	3	4	20745	14206.2	32699.8	13769.6	14641	16751.9	11374.5	101836	21488.1	4204.14	20832.7	14631.6	40621.5	20302.2	16823.2	90607.1	11282.3	18730.2	20090.5	18606.8	0.0430086	0.0430086
M670T249	669.502	249.129	9.049			HMDB0012096		Lipids and lipid-like molecules	Sphingolipids	Phosphosphingolipids	250.168	11	8	0	2	5621	3050.01	5379.9	7909.52	4403.83	14886.8	6009.46	3301.34	6947.59	5434.51	6528.76	4872.39	8842.56	9641.59	4938	3987.29	2864.79	3929.25	4304.02	4041.07	0.0470237	0.0470237
M774T250_1	773.523	250.34	1.63161				C11311				264.923	10	7	0	3	22946	819.947	434.879	199.431	1064.46	2179.17	4742.89	243.445	4886.21	1707.97	560.468	1786.05	4285.05	1268.06	5768.94	728.228	694.737	698.589	1562.14	892.538	0.431058	0.431058
M704T176_2	703.599	175.948	6.08409			HMDB0061712		Lipids and lipid-like molecules	Sphingolipids	Phosphosphingolipids	189.336	12	4	2	6	8557	22964.9	28551.6	5205.42	11614	26187.6	6429.49	4668.7	25068.2	9037.93	20309.4	8373.03	6111.1	9235.36	2921.39	32187.9	5092.73	6383.2	10369.9	10514.1	0.257943	0.257943
M749T142	748.598	142.377	9.24111				C00350				150.228	17	7	1	4	18750	28952.2	32579.1	113397	78769.8	19149.4	4621.99	33828.6	38227.4	13772.6	59212.8	28659.4	45177.3	61273.1	30682.8	40863.5	17685	28557.2	38112.6	38027.1	0.157376	0.157376
M487T100	487.298	100.444	9.58217				C08633	Lipids and lipid-like molecules	Prenol lipids	Triterpenoids	102.637	16	6	1	6	8042	39652.4	57057.7	65784.2	58674.1	31788.5	62451.8	63866.3	41187.4	40328.1	56913.7	53385.4	93012.2	61651	39739.4	12956.3	92753.1	66971.5	66968.9	66048.4	0.00798303	0.00798303
M337T73_1	337.246	72.816	3.00493			HMDB0001483	C02314	Lipids and lipid-like molecules	Fatty Acyls	Eicosanoids	81.813	21	10	1	9	58999	39447	100342	32545.4	33464	64458.7	92807.7	141335	148766	19760.1	29322.2	160368	29411.7	30546.3	100814	35143.4	104696	24148.4	43259.4	27107.1	0.326507	0.326507
M353T110	353.241	110.339	9.43657			HMDB0001335	C01312	Lipids and lipid-like molecules	Fatty Acyls	Eicosanoids	113.837	13	7	1	4	45474	85238.1	84124	31021.5	60040.4	72123	136721	234781	84933.6	78294.9	41279.9	179576	141392	73669.8	60268.1	67724.4	72133.8	69180.8	79116.2	81505.8	0.0853276	0.0853276
M245T245	245.087	244.74	2.01458				C02067				262.417	24	10	2	8	11241	15936.3	47073.2	83593.3	42047.5	67714.5	45122.8	26886.2	27320.6	31543.4	36033.5	37332.7	30491.9	37513.8	29770	87055.6	24287.1	33296	33951	33272.8	0.0114917	0.0114917
M149T259	149.064	259.303	5.15911			HMDB0000694	C03196	Organic acids and derivatives	Hydroxy acids and derivatives	Short-chain hydroxy acids and derivatives	262.454	22	10	3	9	6884	11766	30995.7	14797	17903.8	53114.9	30607.9	23698.3	34719.9	35805.8	14668.7	27072.8	23946.5	17333.6	21718.2	25462.3	11385	21344.9	20865.1	20865.2	0.0131753	0.0131753
M126T293	126.026	292.839	5.61288			HMDB0000251	C00245	Organic acids and derivatives	Organic sulfonic acids and derivatives	Organosulfonic acids and derivatives	295.312	27	10	3	9	72665	62912.8	40670.1	70425	49393.9	229674	13865.5	39175	18196.5	12105.4	16328.5	22627.2	10650.4	81672.9	24704.8	49200.6	19782.5	52783.4	51749.7	52432.6	0.0100463	0.0100463
M235T410	235.099	409.614	1.56612					Organic acids and derivatives	Carboxylic acids and derivatives	Amino acids, peptides, and analogues	418.429	29	9	3	9	6935	5550.22	22769.9	37941.6	21942.9	6441.2	20238.3	14400.1	6352.38	18433	10340.3	5486.72	17029.6	7446.14	11752.9	10939.7	4101.44	6824.11	7787.94	7811.42	0.075372	0.075372
M249T420	249.116	420.213	7.02023					Organic acids and derivatives	Carboxylic acids and derivatives	Amino acids, peptides, and analogues	436.725	19	7	1	6	107457	9798.03	27052.7	16371.9	13785.7	7085.2	20335.4	10065.5	15797.4	23049.4	22801	16995.2	20943.4	5682.67	23368.5	15019.7	15388.6	466031	506050	505764	0.0467362	0.0467362
M221T89	221.121	88.964	9.18888					Organic acids and derivatives	Carboxylic acids and derivatives	Amino acids, peptides, and analogues	90.176	22	10	3	9	13275	32536.3	64781.9	45962.8	44220.9	25426	110707	78951.6	35532.9	52805.1	60958.2	46273.4	77333.5	35851.9	35350.3	41038.6	43583	49754.1	49916.4	49610	0.00308015	0.00308015
M365T365	365.116	364.749	6.77664			HMDB0000975	C01083	Organic oxygen compounds	Organooxygen compounds	Carbohydrates and carbohydrate conjugates	365.252	15	7	1	6	43494	35812.9	23087.2	156566	48759.5	133521	54197.4	26356.4	43799.6	26119.7	72318.8	29771.1	35399.5	30163.3	20570.5	116217	32639.6	125024	126492	125044	0.00670804	0.00670804
M181T369	181.128	368.534	1.71922			HMDB0000888		Lipids and lipid-like molecules	Fatty Acyls	Fatty acids and conjugates	369.778	21	10	2	9	11142	7305.78	11767.8	14376.2	10497.9	4258.98	25585.5	10351.4	8640.38	20539.3	12320	6173.34	8272.51	10513.1	9567.63	3647.73	9969.38	9854.55	9340.64	9354.66	0.0307613	0.0307613
M113T86	113.038	86.0285	3.15184			HMDB0000300	C00106	Organoheterocyclic compounds	Diazines	Pyrimidines and pyrimidine derivatives	87.4	22	10	3	9	82132	170232	365913	131690	218584	219814	196555	252473	276107	277528	87174.1	262209	317485	172060	225121	191386	204340	203383	206263	203366	0.00816201	0.00816201
M233T384_3	233.12	383.514	5.36761					Organic acids and derivatives	Carboxylic acids and derivatives	Amino acids, peptides, and analogues	394.42	22	8	3	9	26180	11575.7	16697.6	29086.6	19351.9	23303.2	65448.1	10233.7	11652.1	50585.6	15471.8	27762.4	13177.3	12525.3	6502.09	15499.9	17980.3	14769.9	15507.2	15502	0.0277997	0.0277997
M153T220	153.045	220.151	2.74411			HMDB0000292	C00385	Organoheterocyclic compounds	Imidazopyrimidines	Purines and purine derivatives	221.946	22	10	3	9	61717	115294	323131	230784	213457	162971	247326	229528	221607	320608	168242	235985	300736	175390	278489	157667	176717	209437	213932	209475	0.0122517	0.0122517
M387T32_1	387.228	32.1935									57.559	18	5	3	5	6527921	5.66933e+06	19025.4	6.22623e+06	16403.5	250769	9851.48	6.09826e+06	5.46081e+06	10482.9	5.6312e+06	5.54022e+06	28111.7	4395.53	9704.69	6.90632e+06	9993.3	27713.4	29287.4	27609.3	0.0333372	0.0333372
M310T34	310.32	33.716									34.373	21	10	2	9	3554679	2.17799e+06	2.10982e+06	4.40859e+06	2.64471e+06	2.44358e+06	5.22033e+06	1.65259e+06	2.82774e+06	2.71396e+06	1.38445e+06	2.94205e+06	1.91399e+06	1.72175e+06	1.88371e+06	2.33895e+06	1.35678e+06	2.14357e+06	2.10535e+06	2.10427e+06	0.0105708	0.0105708
M283T26	283.253	26.315									35.683	18	6	3	7	3487639	55528.9	49651	96743.5	58692.5	24218.6	5.45366e+06	39056.7	5.70368e+06	58064.3	87627.3	12230.3	4.73131e+06	48728.1	3.7018e+06	52454	21985.9	54216.3	54529.3	46459.8	0.0883582	0.0883582
M415T36_1	415.222	35.691									36.338	15	9	1	5	3288756	2.66834e+06	3.43104e+06	2.60569e+06	2.41618e+06	8.15799e+06	1.63787e+06	3.31796e+06	3.77051e+06	2.25454e+06	3.24958e+06	3.00365e+06	3.09693e+06	2.76713e+06	1.94839e+06	2.89311e+06	3.34904e+06	4.04504e+06	4.04528e+06	4.01242e+06	0.00468524	0.00468524
M159T263_2	159.154	263.038									263.744	27	10	3	9	2791293	671577	821323	10337.1	1.0789e+06	364095	9.91497e+06	1.05547e+06	227115	109679	13228.6	119913	1.12638e+06	61360.9	339080	434456	84633.6	1.2758e+06	1.29156e+06	1.27844e+06	0.00658461	0.00658461
M162T353	162.058	353.115									355.003	10	5	0	5	2534176	14907.6	51908	3658.43	7.73499e+06	15451.6	319890	482961	23763.4	146067	1895.88	121996	12251.7	4988.09	19841.3	875078	25167.7	1.19742e+07	1.19722e+07	1.18184e+07	0.00749764	0.00749764
M595T279	595.364	278.793									280.216	12	8	1	3	2452616	1.07643e+06	1.11681e+06	5.27087e+06	5.74427e+06	250365	2.46976e+06	3.04935e+06	1.20508e+06	9.86393e+06	8.76018e+06	671712	3.18018e+06	1.53245e+06	4.04674e+06	3.12271e+06	1.84816e+06	3.19876e+06	3.36405e+06	3.39349e+06	0.0316287	0.0316287
M280T34	280.273	34.371									34.438	21	9	3	9	2452467	2.75422e+06	3.02318e+06	4.23629e+06	3.40738e+06	2.61527e+06	2.68377e+06	2.63881e+06	4.02832e+06	2.22006e+06	2.14889e+06	3.23601e+06	2.95446e+06	2.49817e+06	2.01932e+06	2.81364e+06	2.56467e+06	3.14506e+06	3.07496e+06	3.07468e+06	0.0130899	0.0130899
M173T243	173.17	243.35									244.958	24	10	2	9	2354992	406405	422178	69491.7	1.29929e+06	306767	1.05868e+07	782432	45455.8	327812	48871.4	87064.1	595596	227891	478211	262176	163352	1.08686e+06	1.08687e+06	1.09419e+06	0.00388152	0.00388152
M485T34_1	485.301	33.723									33.808	13	7	1	5	2000367	1.33447e+06	1.75593e+06	2.05862e+06	1.654e+06	65748.7	32833.6	136662	124443	749150	80039.1	66541.4	1.59834e+06	77623.7	347509	73354.4	1.19438e+06	1.93937e+06	1.837e+06	1.83671e+06	0.0316317	0.0316317
M440T200_2	440.293	200.333									201.442	16	6	2	8	1931088	2.0115e+06	4.0074e+06	692643	2.28024e+06	402637	2.84444e+06	3.11265e+06	2.06037e+06	1.47099e+06	4.09464e+06	1.19989e+06	2.42216e+06	1.81902e+06	2.28832e+06	2.86765e+06	1.23384e+06	1.97066e+06	2.00419e+06	1.97068e+06	0.00976389	0.00976389
M385T44	385.223	43.622									47.658	18	9	1	8	1880547	105070	62371.8	45276.8	107350	9.02723e+06	41556.4	26963.7	26618.2	30497.3	96185.5	42995.9	69912.2	42820.9	120723	39153.8	58361	804804	797055	777369	0.0178342	0.0178342
M274T53_2	274.284	53.123									55.393	38	10	3	9	1580367	1.44773e+07	6.93145e+06	6.49477e+06	6.59085e+06	5.64546e+06	5.77555e+06	6.16331e+06	1.1606e+07	4.74237e+06	8.14811e+06	7.97885e+06	6.17299e+06	7.73189e+06	6.67697e+06	8.03368e+06	4.06978e+06	6.84054e+06	6.87098e+06	6.84039e+06	0.00257165	0.00257165
M284T34_1	284.304	34.3675									34.438	20	10	1	9	1546015	2.05717e+06	1.73723e+06	1.39596e+06	1.56282e+06	2.40276e+06	1.64039e+06	948725	2.1051e+06	1.99741e+06	1.12962e+06	1.87081e+06	1.44437e+06	1.34806e+06	1.32009e+06	2.21707e+06	1.72105e+06	1.35643e+06	1.35667e+06	1.29581e+06	0.0262441	0.0262441
M284T26	284.258	26.3295									36.324	14	6	3	5	1546015	18254.9	18646	1.02072e+06	17711	1.95513e+06	1.34988e+06	23589.5	1.16677e+06	19162.4	24999.6	1.51074e+06	1.17083e+06	46977.1	925551	12806.9	4792.38	11954.7	12959.1	12934.5	0.045415	0.045415
M160T389	160.102	388.937									389.915	14	5	3	6	1515234	9200.04	4669.09	24371.7	321919	238821	2.57237e+06	7992.75	12465.6	6955.15	20980.7	289902	244348	14800.9	169580	1.0905e+06	14467.3	9586.86	8672.74	8665.53	0.0590368	0.0590368
M187T225	187.186	225.336									226.404	22	10	3	9	1501122	271082	184240	62595.2	654673	152028	6.35657e+06	627521	51612.7	157517	15636.7	68821.9	611689	236939	470070	204241	188855	593449	590635	593446	0.00274066	0.00274066
M520T193	520.298	193.307									194.835	13	4	1	8	1451650	10591.3	16081	11749.3	23539	20108.2	13226.3	17235.8	357284	9219.76	30387.9	23479.8	240185	116219	15091.1	150640	15119.2	18810.5	18540.9	18810.8	0.00831801	0.00831801
M235T300	234.925	300.378									301.608	18	10	1	7	1450074	3.65941e+06	6.18295e+06	7.6395e+06	7.9412e+06	315186	9.09902e+06	7.36746e+06	6.97034e+06	9.75881e+06	8.8512e+06	4.4445e+06	6.29539e+06	5.32525e+06	6.7815e+06	8.55788e+06	5.69732e+06	6.02007e+06	6.07595e+06	6.0205e+06	0.00532176	0.00532176
M299T38	299.267	37.642									48.209	30	10	1	7	1401868	1.25473e+06	1.79789e+06	2.26889e+06	1.9793e+06	613668	1.33491e+06	1.87315e+06	1.26402e+06	683872	2.37278e+06	2.08835e+06	2.95724e+06	1.7091e+06	1.78849e+06	2.44465e+06	1.51495e+06	1.54021e+06	1.58211e+06	1.53945e+06	0.0157103	0.0157103
M314T37	314.317	36.948									38.97	16	6	3	7	1384368	777742	669077	328512	218033	506533	505390	180550	1.1404e+06	221888	198090	555080	781238	379843	307925	809523	544966	412670	455296	412968	0.0574378	0.0574378
M441T42_1	441.217	42.1825									42.311	16	6	1	8	1284838	1.80028e+06	697621	787018	7.42339e+06	1.59257e+06	767659	1.58157e+06	298867	975664	1.24068e+06	752364	1.07691e+06	372006	1.1653e+06	84882.7	2.05999e+06	2.09984e+06	2.08882e+06	2.08872e+06	0.00305536	0.00305536
M450T37	450.283	37.0465									38.268	12	6	0	6	1236081	52803.9	42021.9	36686.5	27387.2	16752.9	11101.4	18387.2	8712.54	13338.3	35713.7	19258.1	46531.8	55096.3	17358.4	18080.7	13222.8	1.8648e+06	1.1659e+06	1.87174e+06	0.24816	0.24816
M569T32_1	568.546	32.459									33.188	13	7	1	5	1175944	1.51282e+06	1.79993e+06	684480	972334	462528	806502	1.99813e+06	1.25688e+06	973375	696660	1.31892e+06	954955	1.31149e+06	1.45702e+06	671631	942318	1.80104e+06	1.23558e+06	1.71926e+06	0.192775	0.192775
M429T32_1	429.383	31.772									31.819	15	9	1	5	1092690	1.58238e+06	2.04761e+06	2.24838e+06	1.33391e+06	863348	1.82135e+06	2.17351e+06	2.45291e+06	1.83246e+06	2.14952e+06	1.5794e+06	2.31417e+06	2.63951e+06	1.96315e+06	1.9635e+06	1.24421e+06	1.79475e+06	1.79492e+06	1.76084e+06	0.0110056	0.0110056
M433T34_1	433.217	33.7205									50.072	12	7	1	3	1061813	32336.4	22516.4	44481.7	16600.3	17273.4	13363.2	14600.4	103602	28416.2	3899.19	23697.7	27355.6	60995.5	85970.2	16981.1	28387.9	1.43765e+06	1.40368e+06	1.40373e+06	0.0138478	0.0138478
M265T226	265.127	225.944									226.701	12	4	1	7	1047863	291799	65566.5	771012	441191	563130	59901.6	53407.1	68525.3	72131.6	54159.8	60863.8	66535.9	681072	64402.7	432786	50949.5	294081	299877	294130	0.0112568	0.0112568
M300T36	300.299	36.334									38.97	20	9	2	9	1041319	661392	838638	142875	226444	982270	494737	301644	1.44232e+06	299618	190505	469510	578263	278184	285132	1.3184e+06	398855	471607	460472	454625	0.0186638	0.0186638
M441T55_1	441.216	55.362									56.063	16	7	1	8	1041196	1.40408e+06	625331	755902	6.77666e+06	1.57075e+06	576852	1.49923e+06	425913	776105	1.29542e+06	645091	1.00022e+06	325449	969024	82602	1.8313e+06	1.82212e+06	1.80139e+06	1.80122e+06	0.00664748	0.00664748
M332T123_1	332.341	123.404									128.648	22	10	1	9	1040859	975700	35236.6	75833.8	2.59312e+06	4.45515e+06	3893.54	380232	462402	396675	254461	191637	308451	1.02566e+06	829451	502645	100811	430296	608924	607482	0.187132	0.187132
M663T30_2	663.479	30.459									34.376	12	5	1	6	1012173	388155	521207	682035	418812	167003	491886	894478	665617	382672	387501	377768	716020	671051	758125	889113	374583	1.36492e+06	1.36717e+06	1.35959e+06	0.00285538	0.00285538
M429T34_1	429.346	33.722									35.732	14	9	1	4	974357	1.89824e+06	2.74628e+06	318878	1.7434e+06	115117	207686	3.0402e+06	191805	301924	410290	187892	327615	485957	203913	263358	1.92821e+06	1.74828e+06	638590	1.75748e+06	0.465708	0.465708
M247T434	247.138	433.832									435.922	18	8	3	7	959390	62730	63163.6	115207	169419	97756.4	33981.6	52804.9	33774.6	70027.7	131394	35054.6	44878.7	1.94908e+06	62513.6	33075.4	26338.6	143132	147347	143153	0.0167936	0.0167936
M357T111	357.293	110.968									113.356	15	5	3	7	949464	1.31596e+06	5.97721e+06	490233	225639	214658	205050	1.24013e+06	5.23483e+06	371300	395504	639042	1.37607e+06	250332	210461	1.49345e+06	556839	1.2411e+06	1.23388e+06	1.24111e+06	0.00336659	0.00336659
M515T39_3	515.348	38.9395									48.102	12	8	1	2	945626	1.45619e+06	2.49799e+06	2.26377e+06	67099.3	1.63804e+06	2.46017e+06	2.23009e+06	2.31231e+06	34442.2	293242	36902.2	90470.6	77635.5	2.49596e+06	36701	19282.8	1.57648e+06	578871	1.57795e+06	0.463178	0.463178
M313T157_1	313.283	156.719									175.188	29	10	1	8	912305	710899	1.34e+06	497542	530166	514634	863698	2.15627e+06	1.77421e+06	1.3897e+06	1.74745e+06	2.32964e+06	1.63042e+06	902700	1.14873e+06	3.66085e+06	756405	1.2361e+06	1.2519e+06	1.23622e+06	0.00731781	0.00731781
M253T47	253.26	46.765									47.563	27	10	3	9	897727	1.29265e+06	2.39368e+06	682252	518782	355064	1.70604e+06	3.26142e+06	2.7516e+06	625277	702549	3.35127e+06	2.01e+06	1.08841e+06	1.10074e+06	554577	991994	1.65623e+06	1.70858e+06	1.70827e+06	0.0178206	0.0178206
M132T345_3	132.106	344.63									349.229	10	6	0	4	862391	95429.9	251844	582098	513809	16868.2	146498	16722	376873	73255.9	20085.3	16785.2	159191	356226	26337.4	1.67637e+06	15617.3	2.40394e+06	2.45459e+06	2.40488e+06	0.0119669	0.0119669
M467T194	467.263	193.835									195.642	10	7	0	3	816484	3643.66	13825	6582.35	17247.8	27086	13809.4	16003.9	86858.1	4977.51	5664.03	3610.8	43030.4	4625.21	7647.85	490262	3767.93	24100.3	30918.2	24529	0.14401	0.14401
M485T84	485.34	83.819									85.317	12	6	1	5	802724	88515.3	23633.8	52905.7	331529	225340	52248.3	164152	48533.4	23133.6	5.19041e+06	24882	62210.3	52009.5	28780.5	51617.4	61543.3	158537	215085	181319	0.153808	0.153808
M596T278_1	596.377	278.26									278.858	12	4	1	7	800700	377454	388976	1.72508e+06	1.85733e+06	89733.9	819967	1.04591e+06	385448	3.21081e+06	2.83738e+06	229951	865020	495956	1.41321e+06	980354	612820	1.07377e+06	1.12536e+06	1.07424e+06	0.0271764	0.0271764
M672T38_1	671.584	37.64									38.442	11	5	1	5	784246	30123.2	43880.2	42631.6	32561.6	23248.3	44986.2	23722	262147	805245	30558.8	13095.4	26354.9	27635.5	14688.7	36394.1	37875.4	186715	187343	180713	0.0197918	0.0197918
M269T338	269.008	337.991									339.276	20	8	3	9	737514	1.94275e+06	362159	560512	70582.7	121457	27751.1	602516	1.10975e+06	28187.3	13119.4	936416	703632	152167	893793	627896	4.22368e+06	591644	591637	597042	0.00525469	0.00525469
M136T143	136.066	143.079									144.316	15	7	2	6	715506	2.71337e+06	1.81948e+06	2.4571e+06	2.72784e+06	2.26572e+06	3.38727e+06	893888	1.69496e+06	903134	4.77503e+06	3.12924e+06	1.19082e+06	2.74027e+06	1.23067e+06	1.31018e+06	2.68556e+06	2.11636e+06	2.14951e+06	2.11628e+06	0.00900968	0.00900968
M136T147	136.091	146.946									148.93	15	6	3	6	715506	6749.61	71334.6	1.24961e+06	13426.5	59617.7	2.13735e+06	8844.96	82312.6	2734.59	3.44038e+06	4700.03	3940.13	2.25691e+06	17060.2	1.04356e+06	5655.51	17587.3	16873.1	16869.5	0.0241629	0.0241629
M439T36_5	439.372	36.327									38.953	16	7	2	7	714058	314678	191591	179324	467854	1.17423e+06	205235	376583	260380	124260	590014	182514	318963	203585	167402	441714	252553	311296	311693	288169	0.0443462	0.0443462
M353T152	353.317	152.239									153.515	19	8	2	9	712437	742628	598607	95668.1	171378	509111	223640	1.38136e+06	2.85538e+06	534117	908203	3.21476e+06	1.48586e+06	416943	1.84257e+06	834224	1.01636e+06	1.07704e+06	1.07813e+06	1.07704e+06	0.000584418	0.000584418
M333T300	332.902	300.37									301.608	15	9	1	5	707146	1.67537e+06	2.85816e+06	3.484e+06	3.84755e+06	104477	4.16265e+06	3.59288e+06	2.95937e+06	4.65872e+06	4.37742e+06	1.94031e+06	2.89536e+06	2.46933e+06	3.13165e+06	3.95848e+06	2.82617e+06	2.82164e+06	2.82317e+06	2.85706e+06	0.00706454	0.00706454
M636T31	635.572	31.308									38.255	13	5	1	7	699445	78330.1	65101	109562	156517	91833.9	94979	20765.7	187641	100634	68637.2	13087.3	66834.9	21562.7	19529.7	130357	2854.26	79682.3	79587.7	76216.6	0.0251501	0.0251501
M305T136	305.196	135.768									137.279	20	8	3	9	691183	686358	1.69437e+06	2.86359e+06	380506	78765.4	608210	1.78106e+06	801540	5.63371e+06	1.18978e+06	405368	902159	1.3175e+06	1.7968e+06	1.09575e+06	244822	1.51934e+06	1.51933e+06	1.51091e+06	0.00321038	0.00321038
M783T140_1	782.596	139.817									141.584	17	5	1	5	689436	210243	127590	213601	575253	270463	46553.5	210654	355333	63303.8	829347	89055.6	306235	168701	170160	407587	75373.2	515475	544898	531819	0.0277761	0.0277761
M446T32_1	446.413	31.783									32.568	16	7	1	8	651744	579564	934370	1.06343e+06	473059	224514	839377	484197	268517	554895	727406	373219	897649	953122	547172	336643	134661	759847	747302	759856	0.00958822	0.00958822
M476T198	476.295	197.758									198.715	13	3	3	7	644728	539149	862878	237793	586779	220185	821105	798819	1.02763e+06	644720	801514	565418	639313	572489	561779	1.22853e+06	475927	573312	602852	573745	0.0290271	0.0290271
M176T358_2	176.134	358.096									359.005	21	9	3	9	640654	235754	13206.7	1.52503e+06	992635	86131.2	26798.5	310265	486403	20722.5	2.34093e+06	473610	762406	546819	555421	1.12094e+06	1.17816e+06	667370	673102	673122	0.00493936	0.00493936
M379T176_1	379.305	175.7									176.503	16	9	1	6	617227	540296	1.29996e+06	280757	506992	931869	1.50368e+06	1.76675e+06	805846	1.14252e+06	239350	460979	621575	608004	1.15622e+06	151232	260821	751324	770387	751006	0.0146509	0.0146509
M527T33_1	526.529	33.1025									33.742	12	8	1	3	611832	437500	367528	515313	578666	92130.1	417555	203788	353616	395674	401288	515007	514319	702333	469574	171649	286702	313814	465975	467013	0.212106	0.212106
M326T38	326.28	37.644									38.97	17	8	2	7	590818	116092	144395	149295	673699	42014	326938	283729	253140	338973	122342	95823.5	157462	331237	131447	102933	53226.1	208744	198116	198321	0.0301275	0.0301275
M486T38	486.347	38.2985									46.243	10	5	0	5	590252	27272.4	21864.5	51654.4	557204	44541.3	17684	87000.4	63400.8	18811.8	116293	27498.9	592161	9272.75	146451	26754.5	27565.4	633503	633293	615117	0.0168261	0.0168261
M297T54	297.156	54.3375									55.44	16	6	3	7	573330	25433.1	48741.5	52491.5	31235.2	29383.3	46048.8	49762.7	1.80905e+06	34590.7	68374.3	51116.8	739095	224751	34742.2	54924.1	36863.3	49453.3	54342.2	49068.2	0.0577004	0.0577004
M288T39_3	288.299	38.914									38.994	20	9	3	8	571103	534299	540161	440081	430046	640312	532854	407334	416110	495527	304859	337131	331701	256577	463049	476451	675503	652704	664385	652909	0.0101813	0.0101813
M297T39	297.252	38.933									48.611	23	7	3	8	567191	564438	1.88619e+06	173624	276503	1.22989e+06	375748	1.54436e+06	259091	129810	359800	1.80887e+06	333614	252526	963232	487245	1.37201e+06	606312	608640	608650	0.00221555	0.00221555
M277T50_2	277.224	50.466									52.094	18	10	1	7	543841	3.40078e+06	811085	536174	580904	1.61756e+06	436263	937392	1.54985e+06	287062	696352	1.58054e+06	1.25921e+06	682870	903064	1.25855e+06	564816	1.22038e+06	1.45708e+06	1.21614e+06	0.10625	0.10625
M235T77	235.115	77.055									87.4	24	10	3	9	541988	2.04935e+06	3.22439e+06	66167.6	4.28832e+06	169081	2.99688e+06	178900	683307	2.98533e+06	27319.5	83882.6	197029	116773	92908.6	800931	45090.2	1.26533e+06	1.26537e+06	1.24885e+06	0.00755924	0.00755924
M235T70	235.137	69.9225									71.372	18	8	3	7	541988	21953.7	60676.1	70759.2	2.67984e+06	33470.7	70112.7	92308.9	375606	30669	88041	61707.2	185058	44935.5	36811.1	61960.6	64613.9	42105.2	39453.1	42125.2	0.0372798	0.0372798
M371T88	371.271	87.75									88.728	17	6	3	8	529859	1.06629e+06	1.34839e+06	363102	79957.1	366891	43946	123677	2.74584e+06	66525.4	218905	87034.2	377763	31274.1	32883.3	3.8643e+06	156535	671380	667356	667417	0.00344852	0.00344852
M196T381	196.104	380.604									382.487	22	10	3	9	524786	419401	43272.8	1.48584e+06	618933	104623	78905.8	653345	585226	61987.8	1.03084e+06	530930	791883	844618	452915	629609	638772	420379	431205	420585	0.0146008	0.0146008
M321T39_4	321.254	39.121									57.994	21	6	3	9	521824	624107	598657	20173.6	259907	309162	864983	1.48957e+06	29174	169978	221385	1.70512e+06	43250.1	37820.9	1.05697e+06	52433.4	837102	769526	766741	766741	0.00209433	0.00209433
M404T37	404.22	36.9615									37.005	16	7	1	8	521524	737020	540466	658528	471877	610527	392448	554471	509881	488856	557545	478544	638057	582674	496872	654858	477994	614481	614741	592388	0.0211312	0.0211312
M290T90	290.279	90.2185									93.979	22	10	3	9	508084	1.22294e+06	1.50199e+06	927184	4.27901e+06	3.3678e+06	1.34887e+06	2.55952e+06	1.06707e+06	5.25517e+06	695067	2.61287e+06	1.779e+06	2.7507e+06	2.17735e+06	1.13474e+06	719402	2.11936e+06	2.11935e+06	2.10585e+06	0.00368563	0.00368563
M570T32_1	569.541	32.4365									33.074	10	8	0	2	507077	935710	908416	120151	538071	99348.4	813002	897370	186041	184215	96419.8	513287	170373	315806	256143	118311	562476	764881	605094	767252	0.130466	0.130466
M446T34_1	446.384	34.0625									35.052	14	7	1	6	498848	326510	1.4009e+06	222775	257406	101430	91298.5	864215	347175	256619	297762	155798	1.29536e+06	218120	100640	246809	194451	794653	624502	794619	0.133113	0.133113
M137T301_2	136.944	300.969									301.631	22	10	3	9	497910	1.73957e+06	2.74034e+06	3.1087e+06	3.36779e+06	340525	3.69446e+06	3.03978e+06	3.01487e+06	3.99746e+06	3.55243e+06	2.09566e+06	2.63233e+06	2.43268e+06	2.93761e+06	3.37621e+06	2.46065e+06	2.60652e+06	2.62969e+06	2.62182e+06	0.00449903	0.00449903
M187T338	187.001	338.024									338.726	21	9	3	9	495608	1.36222e+06	316831	488393	74853.8	121954	27029.9	491282	866000	32125.1	14913.8	728569	579977	142389	705913	544084	2.76057e+06	488645	491647	491697	0.00356269	0.00356269
M413T32_1	413.386	32.4215									33.073	14	9	1	4	493226	696596	751346	459757	321398	343346	636686	371260	471546	534288	253381	300954	534106	547308	408515	237827	411569	426688	426753	418510	0.0111814	0.0111814
M295T38	295.237	37.649									40.893	15	7	2	6	491494	1.64549e+06	1.55028e+06	532395	511810	936354	861024	1.99407e+06	1.12128e+06	318219	1.42993e+06	3.65506e+06	1.20036e+06	767407	1.26325e+06	698636	2.51025e+06	1.54169e+06	1.63855e+06	1.50169e+06	0.0450905	0.0450905
M535T35_1	534.504	35.02									35.068	13	7	1	5	482578	448822	277409	184524	582848	82626.2	761214	355207	332588	193631	757799	494592	205049	484138	398547	417775	485715	435936	444310	433866	0.012624	0.012624
M277T50_1	277.189	50.095									51.483	13	5	3	5	473909	3.0067e+06	30734.5	87623.9	90087.5	1.4309e+06	781256	76600.8	2.06284e+06	32612.5	639126	1.99206e+06	54109.1	31531.4	28366	2.26158e+06	845412	56933.1	56807.4	76622	0.179718	0.179718
M267T298	267.12	297.849									300.352	19	8	3	8	472926	153042	42730.2	95350.3	182087	1.64546e+06	20912.3	17828	21532.9	13017.2	10933	21011.8	13038.4	87480.8	15786.9	70659.5	16670.1	196546	190698	193002	0.0152314	0.0152314
M430T32_2	430.387	31.771									31.816	14	9	1	4	470981	734204	941491	1.02709e+06	625999	401865	933860	833840	886990	822256	942447	685915	954414	1.085e+06	851415	785617	471868	790840	768461	768293	0.016716	0.016716
M468T196	468.323	195.853									196.932	13	7	1	5	466641	350455	561360	237333	602940	90112.2	336545	298383	501671	329981	982998	368938	332317	488326	334291	223928	319955	355716	359081	350056	0.0128503	0.0128503
M263T36	263.21	36.335									44.189	17	7	3	7	461204	32440.3	26808.3	13708.3	54676.7	54667.5	1.70478e+06	117751	2.29766e+06	30704.1	112222	45541	2.09987e+06	30011.3	31566.1	45256.3	24856	30919	36532.5	36610.6	0.09409	0.09409
M145T68	145.138	68.079									69.352	20	8	3	9	446808	393006	419888	9183.62	851373	120286	3.7406e+06	437619	35824	374752	47008.5	93991.6	271388	38173.3	361144	117405	99498.9	559471	555412	559493	0.00421017	0.00421017
M651T31_1	650.549	31.11									31.308	11	7	1	3	445236	55192.7	69498.3	94615.3	127552	53984.5	63098.2	43808.5	42351.2	336011	83723.6	14942.2	154148	164864	18641.2	93025.5	10663.1	96550.1	92459.5	96448.5	0.0245177	0.0245177
M464T186_1	464.324	185.774									186.522	14	9	1	4	444325	281919	1.14384e+06	300379	316830	140320	410087	890255	954951	566109	772619	676116	569682	443280	436084	757733	264059	545308	545410	537043	0.00884898	0.00884898
M355T127	355.274	127.167									132.699	19	8	2	9	440386	1.57806e+06	4.02695e+06	348300	124986	1.10548e+06	149588	317217	5.28753e+06	92802.8	228876	293089	3.01288e+06	188242	70091	6.31135e+06	241529	1.52967e+06	1.62798e+06	1.62824e+06	0.0356282	0.0356282
M633T32_1	632.503	31.771									33.066	11	8	1	2	439553	193313	179570	371901	419439	88358.1	174423	116142	54443.2	202122	315218	159759	214857	402381	332318	94154.2	103005	231208	229547	234881	0.0117715	0.0117715
M532T30	532.456	30.4615									30.678	12	5	1	6	438704	328736	643558	584523	442727	403114	565161	570294	682132	520687	339446	401369	519497	399286	693646	558033	414948	649537	649678	624685	0.0224371	0.0224371
M543T36_1	542.526	36.33									36.361	11	7	1	3	432836	347972	486921	249170	377021	165256	463096	352751	388284	180154	242677	290898	271181	510082	237609	100356	310089	397880	387023	398369	0.0162623	0.0162623
M240T398	240.095	397.834									409.461	27	9	3	9	431904	266976	404756	20942.4	457594	202475	788524	464201	99565.2	837201	32049.5	47745.7	53009.9	16563.2	7881.97	43390.1	15348.1	222325	223601	222325	0.00330577	0.00330577
M162T86	162.061	85.651									87.253	17	6	3	8	429742	881163	274485	1.9135e+06	339337	204439	3.67397e+06	1.46516e+06	1.67767e+06	377921	350451	1.83576e+06	3.15777e+06	2.44798e+06	3.76457e+06	633604	3.02856e+06	1.55599e+06	1.56946e+06	1.55611e+06	0.00495948	0.00495948
M365T264	365.219	263.734									265.627	19	8	2	9	420096	319024	605872	629272	307881	481410	661456	541390	597486	878977	210957	513577	477749	654544	927488	180930	513966	443830	460006	443926	0.0207271	0.0207271
M424T190	424.296	190.193									199.663	17	7	1	8	419674	521870	876557	190522	590995	94378.1	957131	707500	406030	1.06999e+06	949992	423150	892351	612026	715919	372824	420782	547022	554279	547009	0.00763288	0.00763288
M257T33	257.198	33.404									38.994	20	9	3	8	417922	55021.1	102642	66957.5	43784.9	48700.9	73514	105813	49541.3	43791.8	103499	68851.1	76297.5	49766.1	68731.5	51647.7	64401.8	98207	95505.6	98273	0.016224	0.016224
M619T31_1	618.503	31.4475									35.629	12	3	2	7	412596	106958	104216	312494	227670	150923	95990.7	89755.6	18416.5	112986	264858	144934	209423	302646	265494	161300	78989.4	183934	198131	184623	0.0423792	0.0423792
M618T36	618.445	35.68									36.982	11	7	1	3	412596	300448	218985	174555	96391	419904	288607	222780	101155	64964.7	120319	282354	308486	185672	349523	60917.9	116121	218855	160923	233712	0.188071	0.188071
M316T116	316.332	115.569									117.336	18	7	3	8	412344	1.31731e+06	1.12035e+06	285255	687122	137152	1.11573e+06	153995	1.62012e+06	666269	260134	631977	566303	566693	337797	354499	1.02458e+06	798863	803512	803529	0.00335301	0.00335301
M288T39_1	288.261	38.925									46.824	13	6	1	6	411422	1.04225e+06	67027	60525	106881	120404	1.03999e+06	833967	56520.1	140094	606856	91559.3	667032	103796	911959	52532.9	30407	747990	411909	745293	0.304319	0.304319
M582T37	581.538	36.899									38.314	11	7	0	4	402355	7117.19	37345.8	20828.9	31904.9	18079.5	26517.1	42588.6	94917.8	248123	21331.2	41739.7	27031.3	24423.7	28330	36598.8	56103.9	35274.4	42934	34164.3	0.12748	0.12748
M234T418	234.142	417.731									419.113	16	8	3	5	391516	153048	29657.9	923399	348071	28393.7	37753	237392	178107	8371.15	699464	205539	261943	677625	233941	147803	414624	242720	242688	234967	0.0186029	0.0186029
M518T191_1	518.332	190.952									200.953	14	8	1	5	390486	1389.59	398088	370672	502568	856680	126510	917876	1.00858e+06	442906	1.07695e+06	1.08644e+06	761458	459262	604026	1.43692e+06	214604	232914	589338	594111	0.438813	0.438813
M306T36	306.255	36.33									42.234	13	6	2	5	389261	12860.7	109923	71182.4	170865	3455.96	97942.9	6278.95	4926.47	55981.3	127451	13794	9023.98	9428.2	11606.1	100621	9782.8	37103	24754.2	19087.7	0.341412	0.341412
M207T37_1	207.068	36.9875									48.795	16	8	3	4	387955	31330.7	18578.2	25057	28902.2	10838.3	20332.8	76389.4	28833.5	23199.3	90261.7	36550.4	10976.1	496753	91695.1	13514.7	14930.9	44744.3	44745.6	45261	0.00663369	0.00663369
M299T101	299.264	100.559									106.729	23	10	1	7	386030	350473	1.72741e+06	147215	148371	599258	640241	912782	1.67919e+06	248190	168552	985270	514093	63764	742849	287098	1.25969e+06	588428	588786	590396	0.00177904	0.00177904
M313T198_1	313.283	197.758									198.862	19	10	1	8	381703	421158	829907	182070	456062	180935	745856	746304	759609	538275	615096	433163	557235	442485	407036	1.15572e+06	346197	471185	491237	491687	0.0241572	0.0241572
M142T263	142.127	263.02									263.744	27	10	3	9	380528	90784	118817	9732.8	160646	55462.5	1.2911e+06	148201	35483.2	20502.6	15208.2	47137.1	170548	15303.5	52354	66176.2	16530.6	179414	181462	181513	0.00662249	0.00662249
M309T31	309.253	31.0835									31.78	18	7	3	8	375120	703374	441808	135014	164442	101517	254219	656363	308120	127217	305706	801863	927568	241203	775684	129636	361802	431811	432259	418463	0.0183363	0.0183363
M212T390	212.06	389.957									391.617	22	10	3	9	374405	255505	101318	151638	284926	122172	256477	522897	620660	174645	599462	667178	484765	197141	449135	174145	596829	273405	285336	270229	0.0288253	0.0288253
M564T33_1	563.566	33.089									33.742	13	7	1	5	373888	188102	316492	253416	348681	287441	227768	255656	281507	252140	171541	391176	428935	330466	179038	329721	206136	231461	220840	227861	0.0238251	0.0238251
M379T207	379.305	206.824									207.851	17	9	1	7	364543	299305	616292	91634.8	313100	716143	738932	845394	401527	779840	69810.9	232680	325269	192255	647101	76480.8	115181	399348	395121	395117	0.00615744	0.00615744
M533T33_1	532.522	33.0715									33.71	12	7	1	4	363571	704972	882321	200856	110359	78362.3	58213.6	641602	271524	158242	92353.5	193750	68688.2	214060	201294	734011	550750	580557	252275	585328	0.403888	0.403888
M136T170	136.052	169.692									173.085	14	4	3	7	363239	130160	317982	151087	109019	69050.7	2206.13	416373	16811.9	2568.4	1.02193e+06	1.04752e+06	354822	149078	442111	139873	611805	61502	59981.7	59898	0.0149333	0.0149333
M321T39_2	321.193	38.964									49.455	17	6	3	7	361953	33011.3	50186.7	32549.2	27829.9	56885.1	26589.8	120766	1.09882e+06	36646.5	43576.9	28726.7	699497	574953	20564.2	128751	31756.5	61469.1	62552.1	62975.7	0.012465	0.012465
M187T32	187.103	32.451									33.116	14	5	3	6	360734	40728.8	24154	26447.8	37317.3	40079	27795.9	65147.5	47419.5	24337.7	36253.1	26757.9	31264	42688.5	64813.5	29022.8	30758.3	448644	435530	437764	0.0159221	0.0159221
M488T185_2	488.332	184.839									185.237	14	4	3	7	359476	84375.7	133547	89293	38099.7	139545	19351.8	216675	194668	36194.9	146999	54773.8	128712	1367.25	37452.8	849177	40660.9	139967	145363	139974	0.0219619	0.0219619
M383T35	383.378	34.981									36.338	21	9	3	8	355575	76103	87776.4	66874.1	80310.3	42134	150978	447756	44411.1	200005	56998.2	67523.5	204633	46299.8	275143	94575.9	14745.1	102817	105987	101535	0.0221543	0.0221543
M256T43	256.123	43.449									44.933	17	8	3	6	352047	125364	70849.4	26131.9	59588.9	141493	36116.6	51258.5	18701.8	48380.9	23856.7	12373.8	48277.8	21133.9	33139	24096.2	59463	30625.6	27793.3	27675.1	0.0582055	0.0582055
M340T39_1	340.184	38.9395									39.121	18	10	1	7	350366	177788	128356	75140.9	183766	33263.8	62345.4	235671	336667	108134	195710	164014	108162	101642	136176	549190	128473	171919	171806	176346	0.0149352	0.0149352
M175T400_2	175.077	399.582									401.576	22	10	3	9	350279	242711	567011	195532	172316	78353.5	304704	1.17674e+06	580530	388870	349438	660232	583058	370395	275491	374762	208835	354275	358233	354268	0.00643208	0.00643208
M217T34_1	217.112	34.371									35.019	15	8	1	6	348885	60561.1	56020.2	52366.2	58091.1	92826.3	86339.8	102850	44832.3	62393.8	54607.8	46785	40732.4	47270.4	91122.6	54805.4	73577.2	488054	487904	473042	0.0178551	0.0178551
M294T36_2	294.252	36.3145									36.338	18	8	2	8	344856	73632.5	71891.3	118582	79340.8	88509.5	131582	87677.2	414144	86801.3	93077.9	114513	138416	70997.8	100428	101184	104362	94353.5	99758.4	157440	0.298398	0.298398
M290T78	290.279	77.659									80.546	18	6	3	9	342476	884381	709986	418360	2.09482e+06	2.15978e+06	879399	1.17149e+06	631464	2.00303e+06	411941	1.43666e+06	772646	1.41536e+06	1.4059e+06	540791	443902	1.11263e+06	1.13012e+06	1.10618e+06	0.0110982	0.0110982
M279T74	279.241	74.0665									82.423	18	8	2	8	341332	1.30372e+06	2.37282e+06	419470	557421	1.98816e+06	555276	2.22853e+06	3.83569e+06	352593	699542	2.92274e+06	1.35995e+06	588430	2.0356e+06	572318	2.90798e+06	1.15139e+06	1.17584e+06	1.1762e+06	0.0121769	0.0121769
M427T33	427.37	33.07									50.765	17	6	2	8	341069	572332	683035	637786	676862	361200	465550	841606	751513	627906	1.10109e+06	467265	767268	976898	548122	572782	521043	632471	631699	623224	0.00815457	0.00815457
M585T33	584.543	33.0945									33.734	12	7	1	4	340423	173872	193595	262087	263643	54388	298835	153854	225697	172233	310498	345915	268516	547478	251591	140734	203097	293387	287188	273217	0.0363025	0.0363025
M597T36_1	596.543	35.673									38.255	13	7	1	5	339216	45170.4	23186.7	70320.7	36285.4	31819.3	54691	49135.1	66895	18687.8	48440.3	65067.7	72716.3	65611.5	51992.1	50076.8	21996.3	31934.5	30668.7	20567.5	0.224704	0.224704
M174T310_2	174.13	309.684									320.25	23	10	3	9	336437	262616	47967.3	695311	321003	339306	59603.1	234900	172161	80817.1	656630	275770	526754	387070	469405	350662	373362	302976	322066	303010	0.035597	0.035597
M250T38_1	250.119	38.299									38.974	19	10	1	8	333170	203445	425214	151012	235846	169054	333284	304934	280825	327069	209466	219301	363630	207728	332559	269314	298464	246786	256193	278851	0.0632462	0.0632462
M529T300	528.861	300.206									301.596	13	8	1	4	332342	547612	1.12651e+06	1.33166e+06	1.52017e+06	13338.7	1.78492e+06	1.45944e+06	1.08e+06	1.91635e+06	1.82558e+06	646477	1.07019e+06	913990	1.22887e+06	1.57163e+06	1.05835e+06	1.06897e+06	1.06908e+06	1.09084e+06	0.011704	0.011704
M673T38	672.585	38.3625									45.453	12	4	1	7	326555	47118.7	223128	41616.5	28938.5	16226.6	24606.5	91987.1	161368	405510	11268.7	32262.4	50399.4	30901	21218.6	61284.7	41621.3	129419	133328	129490	0.0171076	0.0171076
M507T33_1	506.505	33.0715									33.742	14	8	1	5	325542	209037	205262	148685	247777	26715.2	361042	185226	273383	176056	206226	195550	146862	257989	216311	126936	113073	210577	214930	210566	0.0118687	0.0118687
M502T34_1	502.341	33.808									50.828	13	6	2	5	324478	187136	336473	407184	227752	24668.3	25753.8	45470.1	9689.9	149285	70135.5	98370	463148	87477.6	101718	31557.1	296906	335784	330968	335787	0.0083234	0.0083234
M411T60_1	411.202	59.696									60.228	17	9	1	7	321708	599644	272068	213954	2.01452e+06	487122	173164	345835	216479	214618	384334	246839	332308	110008	540063	36865.8	757971	584824	584856	575879	0.0088922	0.0088922
M309T32	309.161	31.7925									44.201	16	6	2	6	317304	3574.1	9720	10253.1	14252.6	3447.24	8575.08	12778.5	9433.68	30213	123696	4870.49	6882.3	123867	287014	4259.98	7101.97	14795.4	17687.9	14128.1	0.12179	0.12179
M230T328_2	230.194	328.245									329.306	21	8	3	9	315647	1.00043e+06	946845	757256	1.42701e+06	1.39739e+06	2.49666e+06	673027	702022	1.97319e+06	531787	1.08108e+06	1.3558e+06	541753	1.48486e+06	363596	1.79606e+06	1.04314e+06	1.05391e+06	1.05399e+06	0.00594208	0.00594208
M642T131	641.534	130.618									131.925	11	4	1	6	313766	737551	1.52249e+06	240761	1.04262e+06	240068	810191	1.0033e+06	163686	557914	537133	238048	717791	1.14672e+06	521644	571387	234803	658847	664463	658837	0.00491184	0.00491184
M556T34	556.499	34.376									38.265	10	7	0	3	313738	37946.6	26862.1	15654.5	31452.7	165928	54275.9	29707.3	11639.3	19772.8	20585.2	167186	21326.8	36007.4	18252.3	59019.3	19120.8	76565.3	98075.1	74128.5	0.158926	0.158926
M476T188	476.271	188.2									198.404	13	4	3	6	312777	9294.47	16265.6	37545.9	9007.24	16369.7	17167.7	15123.5	27245.7	19585.9	30794.7	4642.63	22667.6	13749.5	12849.7	29110.1	12520.1	11773.5	11740.6	12320.2	0.027256	0.027256
M321T146	321.254	146.33									159.819	17	8	3	6	309691	68709.4	112839	48905.5	204767	63155.9	114725	2.59893e+06	95791.6	537044	68434.2	31593.4	178629	125787	206624	66605.3	204900	230595	229429	230582	0.00290773	0.00290773
M267T36	267.133	35.732									48.475	21	8	3	8	308319	360079	410380	421776	317282	449959	249558	383145	383412	320041	395962	369654	396650	377568	348751	493039	299574	554542	561426	550893	0.00962577	0.00962577
M299T159_1	299.266	159.3									160.058	24	10	1	8	305281	262547	316969	301252	266200	107160	404858	697077	500696	484617	1.25745e+06	816768	1.09207e+06	540808	598004	1.1493e+06	804574	565942	572290	566065	0.00638959	0.00638959
M299T161	299.315	161.305									172.423	18	6	3	5	305281	218810	278842	55484.6	19872.8	76962.9	32310.7	8471.32	398842	10406.5	28851.9	8317.43	922212	29924.4	7925.73	1.08264e+06	7415.66	13701.1	14051.3	14043.8	0.0143578	0.0143578
M571T36_1	570.555	35.679									36.335	13	10	1	2	298911	346909	304354	143161	344254	197787	138768	61603.5	138509	154083	123283	232889	192614	308000	200526	44805.5	12815.3	225987	230520	225893	0.0116267	0.0116267
M74T182	74.0993	182.351									184.835	22	10	3	9	297205	4.44858e+06	3.85232e+06	3.30649e+06	3.08524e+06	3.05287e+06	4.13789e+06	3.63999e+06	2.42157e+06	2.72297e+06	2.88473e+06	4.1043e+06	2.5359e+06	2.76371e+06	3.13746e+06	2.51072e+06	4.45424e+06	3.16924e+06	3.39494e+06	3.38848e+06	0.0387277	0.0387277
M326T117	326.386	117.451									120.228	27	9	1	7	296235	273342	84185.5	23744.8	1.10501e+06	442597	20172.6	31862	218072	259548	27355	77444.4	24408	86989.6	105214	76350.5	10391.5	210779	220998	221029	0.0271553	0.0271553
M411T33_1	411.375	33.071									36.305	16	7	1	8	295467	564966	687457	588791	499782	343263	522629	581410	576122	667525	692660	450051	622714	665648	486965	470367	432735	572840	572845	550387	0.0229319	0.0229319
M432T36_1	432.247	35.72									36.335	16	9	1	6	294519	253492	248793	223823	211151	313488	150610	317020	254637	187509	249562	196871	249917	200499	146986	222656	247710	363829	335329	335316	0.0477286	0.0477286
M432T37	432.332	36.899									39.481	15	8	1	6	294519	38245.3	341599	31981.6	37742.4	25157.5	229046	70540.4	36733.1	19613.6	90318.6	215719	51419.8	49277.4	14808	16906.3	16429.6	361199	162313	370239	0.394484	0.394484
M296T36_1	296.268	35.6745									36.332	20	10	1	8	291600	297844	329059	435390	292679	247359	520999	388627	337567	263361	220155	408170	261563	263574	241962	305089	298708	349333	349371	337807	0.0192923	0.0192923
M123T312_2	123.059	312.389									314.761	22	10	3	9	291463	118149	620537	154077	255847	104265	713429	325568	366994	514528	43828.2	395054	538637	273540	1.03646e+06	159291	151975	350013	356715	351154	0.0101683	0.0101683
M330T39	330.252	38.964									43.525	13	4	3	6	291202	373341	38256.5	251789	12472.9	33040.2	36834.5	57015	358995	46172.9	287794	62854.8	239247	384871	446057	36179.6	36378.7	43189.8	43166.1	37239	0.0832285	0.0832285
M355T194	355.306	193.883									194.992	17	9	1	7	290107	37968.3	24902.7	25319.7	20258.7	1.9115e+06	26942.1	26362.8	31626.3	25313.3	24202.9	34426.4	23537.5	42732.9	51457.6	8024.47	25612	88105.8	58825.7	88221.8	0.216094	0.216094
M462T200	462.277	200.333									201.442	14	5	2	7	289173	366254	502678	143504	415989	116999	418176	390772	397286	275431	656476	239483	470943	379283	423937	615540	202436	323262	332453	323481	0.0160672	0.0160672
M436T198	436.296	197.746									199.512	26	6	1	8	288984	292223	606246	112000	305439	97836	477303	523411	504646	349734	472392	429479	342382	289922	271374	666086	254662	341364	344103	342294	0.00406507	0.00406507
M507T152	507.323	152.174									153.515	14	7	1	6	288536	187810	480449	26910.4	49754.2	136465	49696.6	795415	1.07944e+06	134239	220693	703924	601061	110760	444583	166245	250978	417163	372053	411485	0.0613881	0.0613881
M445T32_1	445.379	31.793									32.568	15	8	1	6	286897	389099	459122	507431	437213	235683	329054	588592	568860	478928	623125	317912	554398	611874	410751	547174	319289	432020	438781	429928	0.0106725	0.0106725
M128T291	128.111	291.465									292.138	22	10	3	9	284642	248251	279999	10792.3	429831	205142	1.691e+06	307706	115726	83282.3	10009.5	37269.4	461924	28494.6	135121	126096	45120.5	346500	348999	346493	0.00415994	0.00415994
M425T32_1	425.317	32.424									35.68	16	8	1	7	283196	168553	341758	474318	199529	117387	164611	399900	227652	190508	384337	175288	401043	382313	180690	185191	166964	319372	311501	311549	0.0144218	0.0144218
M146T220_2	146.064	220.488									225.754	22	10	3	9	282586	332526	624408	27113.4	489458	237526	658676	369883	276000	871726	12087.3	205392	279367	61033.9	263849	38055.1	355126	295604	300599	295648	0.00965798	0.00965798
M653T252_1	653.371	252.195									252.838	11	7	1	3	281888	163584	169358	586157	696649	34732.2	211301	469533	176518	1.00167e+06	1.39753e+06	113888	314134	247846	481277	648964	228661	362950	375034	362894	0.0190561	0.0190561
M336T252	336.239	252.032									255.46	16	6	2	8	281015	13937.1	33228.6	5856.45	6489.32	1.88484e+06	20395.2	17523	38776.5	21115.2	29213.3	15726.8	15042.2	36609.2	8207.87	4482.52	7696.04	105570	99839.4	99954.7	0.0321844	0.0321844
M246T520	246.188	519.721									526.82	20	10	1	8	279389	227761	767849	103093	171922	1.39162e+06	2.28893e+06	467311	769414	383449	204237	511790	775432	56483	637633	467901	1.24724e+06	635305	647237	635207	0.0108215	0.0108215
M298T37	298.32	36.973									37.539	17	7	2	8	277963	98696.6	103148	124095	30075.7	52823.3	85235.6	26303.6	199198	115774	148804	72854.9	96728.2	137714	34241.8	97521.1	87641.5	126459	103923	100987	0.126169	0.126169
M385T36_3	385.32	36.338									37.072	15	8	1	6	275013	131622	99935	69027.7	100444	28434.5	46292.1	90181.6	639017	69329.5	95730.7	79011.2	72017.3	119699	62787.8	69565.8	74537.2	163838	149062	163606	0.0532915	0.0532915
M451T36_1	451.3	35.708									38.27	13	6	1	6	270541	48489.1	45238.7	88010.7	64912.5	56095.4	80997.8	83860.7	83756.2	82912.2	102483	70732.4	110664	98136.2	65976.2	77141.9	65127.2	488347	327826	492911	0.215469	0.215469
M159T171_2	159.033	171.117									183.335	32	10	3	9	267167	294456	1.21291e+06	289961	365522	580742	866486	912689	707882	1.07805e+06	608335	1.35075e+06	1.23547e+06	465242	1.2657e+06	298183	1.01988e+06	546298	553174	546271	0.00725098	0.00725098
M421T35	421.358	35.0195									36.332	16	9	1	6	265635	138254	129453	95168.4	112473	501405	95152.3	182167	78281.5	82432.1	182168	88695.2	141112	130177	103605	81284.5	117932	156635	156580	148381	0.030869	0.030869
M547T153	547.326	152.546									165.142	12	3	2	7	262929	323119	299994	65111.4	77284.3	250268	120179	633953	9150.12	274780	389177	1.15048e+06	39150.5	179349	737835	380566	400184	455243	461561	461571	0.00794534	0.00794534
M338T42_1	338.28	42.194									42.862	22	10	1	8	262431	259717	255183	179691	199744	396178	232129	311495	406627	119828	287588	304646	372091	300769	189056	486243	256047	299039	296795	300039	0.00556392	0.00556392
M152T528_1	151.631	528.387									532.78	21	9	3	8	261415	35354.3	79183.7	22482.4	30524.6	2.74544e+06	80890.6	78919.6	33666	2.20137e+06	45404.3	75320.7	54832.2	34999.3	24436	2633.49	9300.31	285648	268357	284996	0.0350407	0.0350407
M320T142	320.303	141.709									142.874	19	10	1	8	261189	1.08829e+06	67141.2	47924.7	1.27974e+06	1.23537e+06	16408.4	126877	219544	75130.4	290383	93350.9	353523	153039	145356	193117	201107	343292	345889	346385	0.00481187	0.00481187
M494T181	494.37	181.487									189.707	16	9	1	5	259414	39974.8	87985	42192.9	21405.2	76438	6817.91	110130	130718	23832.1	102125	42982.3	68183.1	64861.3	21981.5	766500	6006.63	74042.9	75308.2	74060.5	0.0097416	0.0097416
[truncated: 6,585 more rows]

## Sheet: neg
ID	m/z	rt(s)	PPM	Name	adduct	HMDB	KEGG	SuperClass	Class	SubClass	rtmax	npeaks	control	QC	T2DM	maxint	MT01	MT02	MT03	MT04	MT05	MT06	MT07	MT08	Control1	Control2	Control3	Control4	Control5	Control6	Control7	Control8	QC-1	QC-2	QC-3	RSD	QCRSD
[truncated: 6,842 more rows]
